# Supplementary material
Source: publisher figshare collection journal article supplement (https://gsajournals.figshare.com/ndownloader/files/22015047)
Supplement: Supplementary file 1 [file 22015047]

## Sheet: List_of_genes
gene_id	gene_description	gene_name	baseMeanCPM_KT_30	baseMeanCPM_V_30	FC	logFC	logCPM	LR	PValue	FDR	transcript_count	gene_biotype	zfin_id_id	Entrez_id	Uniprot_id	go_id	go_term	go_ontology	interpro_family	interpro_family_description	goslim_goa_accession	goslim_goa_description	kegg_path_enzyme
ENSONIG00000016380			0	3.50686	-511.087	-8.99742	0.17381	55.3644	1.00135e-13	1.77138e-09	1	protein_coding				GO:0005515	protein binding	molecular_function			GO:0003674	molecular_function
ENSONIG00000006279	palmitoyltransferase ZDHHC3	zgc:77880	7.18169	17.9253	-2.49799	-1.32077	3.34119	32.2275	1.37134e-08	0.000121295	2	protein_coding	ZDB-GENE-040426-1901	100707932	I3JGC1;I3JGC2	GO:0016020;GO:0016021;GO:0016740;GO:0016746;GO:0019706	membrane;integral component of membrane;transferase activity;transferase activity, transferring acyl groups;protein-cysteine S-palmitoyltransferase activity	cellular_component;molecular_function	PTHR22883_SF21	PALMITOYLTRANSFERASE EC_2.3.1.225	GO:0005575;GO:0016746	cellular_component;transferase activity, transferring acyl groups
ENSONIG00000016075	ribosomal protein S27a	rps27a	234.317	436.394	-1.86196	-0.896825	8.50823	29.7241	4.98111e-08	0.00029372	1	protein_coding	ZDB-GENE-030131-10018			GO:0005840;GO:0006412;GO:0003735;GO:0005515	ribosome;translation;structural constituent of ribosome;protein binding	cellular_component;biological_process;molecular_function	PTHR10666_SF99	UBIQUITIN 40S RIBOSOMAL S27A PRECURSOR[CONTAINS UBIQUITIN; 40S RIBOSOMAL S27A]	GO:0003674;GO:0005198;GO:0003735;GO:0009058;GO:0034641;GO:0006412;GO:0032991;GO:0005575;GO:0043226;GO:0005840	molecular_function;structural molecule activity;structural constituent of ribosome;biosynthetic process;cellular nitrogen compound metabolic process;translation;protein-containing complex;cellular_component;organelle;ribosome
ENSONIG00000013990	C-X-C motif chemokine 10		26.6724	10.9209	2.44576	1.29028	4.19052	27.4122	1.64387e-07	0.000415429	1	protein_coding		100697780	I3K8Z1	GO:0008009;GO:0006935;GO:0006955;GO:0005576;GO:0006952;GO:0060326	chemokine activity;chemotaxis;immune response;extracellular region;defense response;cell chemotaxis	molecular_function;biological_process;cellular_component			GO:0005575;GO:0005576;GO:0002376;GO:0040011;GO:0006950;GO:0048870	cellular_component;extracellular region;immune system process;locomotion;response to stress;cell motility
ENSONIG00000015497			22.023	38.774	-1.75594	-0.812245	4.80121	28.3347	1.02053e-07	0.000415429	4	protein_coding			I3KEF6;I3KEF5;I3KEF7;I3KEF4	GO:0004842;GO:0007166;GO:0005509;GO:0001784;GO:0023051;GO:0016567	ubiquitin-protein transferase activity;cell surface receptor signaling pathway;calcium ion binding;phosphotyrosine residue binding;regulation of signaling;protein ubiquitination	molecular_function;biological_process	PTHR23007_SF3	E3 UBIQUITIN LIGASE CBL B EC_2.3.2.27 CASITAS B LINEAGE LYMPHOMA PROTO ONCOGENE B RING TYPE E3 UBIQUITIN TRANSFERASE CBL B SH3 BINDING CBL B SIGNAL TRANSDUCTION CBL B	GO:0003674;GO:0043167;GO:0007165;GO:0006464	molecular_function;ion binding;signal transduction;cellular protein modification process
ENSONIG00000016967	trafficking protein particle complex subunit 6B		229.522	154.159	1.48805	0.573426	7.61893	27.4406	1.61991e-07	0.000415429	1	protein_coding		100707247	I3KJV1	GO:0048193;GO:0043087	Golgi vesicle transport;regulation of GTPase activity	biological_process	PTHR12817	TRAFFICKING PARTICLE COMPLEX SUBUNIT TRAPP COMPLEX SUBUNIT	GO:0008150;GO:0006810;GO:0016192	biological_process;transport;vesicle-mediated transport
ENSONIG00000025501			0.948819	17.9423	-18.7168	-4.22626	2.52429	27.5197	1.55501e-07	0.000415429	2	lincRNA
ENSONIG00000000803	delta-type opioid receptor	oprm1	353.95	215.753	1.64027	0.713935	8.17972	26.4199	2.747e-07	0.000607431	1	protein_coding	ZDB-GENE-010125-1	100712332	I3IWN1	GO:0004979;GO:0004985;GO:0016021;GO:0007186;GO:0004930;GO:0016020;GO:0007165;GO:0007218;GO:0038046;GO:0038047;GO:0038003;GO:0071315;GO:0005887	beta-endorphin receptor activity;opioid receptor activity;integral component of membrane;G protein-coupled receptor signaling pathway;G protein-coupled receptor activity;membrane;signal transduction;neuropeptide signaling pathway;enkephalin receptor activity;morphine receptor activity;opioid receptor signaling pathway;cellular response to morphine;integral component of plasma membrane	molecular_function;cellular_component;biological_process	PTHR24229_SF7	MU TYPE OPIOID RECEPTOR M OR 1 MOR 1	GO:0003674;GO:0007165;GO:0005575	molecular_function;signal transduction;cellular_component
ENSONIG00000006283	ribosomal protein L23	rpl23	196.859	330.476	-1.67868	-0.747323	8.15322	25.96	3.48562e-07	0.000685119	2	protein_coding	ZDB-GENE-030131-8756	100701640	I3JGC8;I3JGC7	GO:0005840;GO:0006412;GO:0003735	ribosome;translation;structural constituent of ribosome	cellular_component;biological_process;molecular_function	PTHR11761_SF8	60S RIBOSOMAL L23	GO:0003674;GO:0005198;GO:0003735;GO:0009058;GO:0034641;GO:0006412;GO:0032991;GO:0005575;GO:0043226;GO:0005840	molecular_function;structural molecule activity;structural constituent of ribosome;biosynthetic process;cellular nitrogen compound metabolic process;translation;protein-containing complex;cellular_component;organelle;ribosome
ENSONIG00000018515	ribosomal protein S24	rps24	105.649	211.992	-2.00575	-1.00415	7.44413	25.2421	5.05676e-07	0.00089454	1	protein_coding	ZDB-GENE-040109-5	100700493	I3KQB5	GO:0005622;GO:0005840;GO:0006412;GO:0003735;GO:0060215;GO:0060216	intracellular;ribosome;translation;structural constituent of ribosome;primitive hemopoiesis;definitive hemopoiesis	cellular_component;biological_process;molecular_function	PTHR10496	40S RIBOSOMAL S24	GO:0003674;GO:0005198;GO:0003735;GO:0009058;GO:0034641;GO:0006412;GO:0032991;GO:0005575;GO:0043226;GO:0005840;GO:0005622;GO:0048856	molecular_function;structural molecule activity;structural constituent of ribosome;biosynthetic process;cellular nitrogen compound metabolic process;translation;protein-containing complex;cellular_component;organelle;ribosome;intracellular;anatomical structure development
ENSONIG00000023302			17.3012	29.4902	-1.70121	-0.766562	4.5467	24.9885	5.76726e-07	0.000927481	2	lincRNA
ENSONIG00000000435	ribosomal protein S12	rps12	87.3784	162.07	-1.85402	-0.890654	7.10731	24.3343	8.09827e-07	0.00110199	1	protein_coding	ZDB-GENE-030131-8951			GO:0005622;GO:0005840;GO:0006412;GO:0003735	intracellular;ribosome;translation;structural constituent of ribosome	cellular_component;biological_process;molecular_function	PTHR11843	40S RIBOSOMAL S12	GO:0003674;GO:0005198;GO:0003735;GO:0009058;GO:0034641;GO:0006412;GO:0032991;GO:0005575;GO:0043226;GO:0005840;GO:0005622	molecular_function;structural molecule activity;structural constituent of ribosome;biosynthetic process;cellular nitrogen compound metabolic process;translation;protein-containing complex;cellular_component;organelle;ribosome;intracellular
ENSONIG00000008663	transporter 1, ATP binding cassette subfamily B member	tap1	23.7847	12.8686	1.85296	0.889835	4.18116	24.3426	8.0635e-07	0.00110199	2	protein_coding	ZDB-GENE-050517-43	100701175	I3JPU7;I3JPU6	GO:0030176;GO:0042626;GO:0016887;GO:0055085;GO:0016021;GO:0005524;GO:0015433;GO:0042287;GO:0046979;GO:0002479;GO:0042825;GO:0016020;GO:0000166;GO:0042886	integral component of endoplasmic reticulum membrane;ATPase activity, coupled to transmembrane movement of substances;ATPase activity;transmembrane transport;integral component of membrane;ATP binding;peptide antigen-transporting ATPase activity;MHC protein binding;TAP2 binding;antigen processing and presentation of exogenous peptide antigen via MHC class I, TAP-dependent;TAP complex;membrane;nuc…	cellular_component;molecular_function;biological_process	PTHR24221_SF3	ANTIGEN PEPTIDE TRANSPORTER 1 APT1 ATP BINDING CASSETTE SUB FAMILY B MEMBER 2 PEPTIDE TRANSPORTER TAP1	GO:0003674;GO:0043167;GO:0005575;GO:0006810;GO:0055085;GO:0016887;GO:0022857;GO:0002376;GO:0032991	molecular_function;ion binding;cellular_component;transport;transmembrane transport;ATPase activity;transmembrane transporter activity;immune system process;protein-containing complex
ENSONIG00000000900	60S ribosomal protein L19	rpl19	215.503	355.001	-1.64703	-0.719871	8.27158	23.6574	1.15103e-06	0.00145441	1	protein_coding	ZDB-GENE-040426-2290	100709589	I3IWZ8	GO:0022625;GO:0005622;GO:0003723;GO:0005840;GO:0006412;GO:0003735	cytosolic large ribosomal subunit;intracellular;RNA binding;ribosome;translation;structural constituent of ribosome	cellular_component;molecular_function;biological_process	PTHR10722	60S RIBOSOMAL L19	GO:0003674;GO:0005198;GO:0003735;GO:0009058;GO:0034641;GO:0006412;GO:0032991;GO:0005575;GO:0043226;GO:0005840;GO:0003723;GO:0005622	molecular_function;structural molecule activity;structural constituent of ribosome;biosynthetic process;cellular nitrogen compound metabolic process;translation;protein-containing complex;cellular_component;organelle;ribosome;RNA binding;intracellular
ENSONIG00000018877			48.2747	31.3163	1.54047	0.623367	5.30444	23.0515	1.57717e-06	0.00186001	1	protein_coding				GO:0016021	integral component of membrane	cellular_component	PTHR11266_SF9	MPV17 M LP HOMOLOG M LPH	GO:0005575	cellular_component
ENSONIG00000002634	fatty acid binding protein 11a	fabp11a	31.7831	55.9761	-1.75743	-0.813465	5.51442	22.5167	2.08329e-06	0.00230334	1	protein_coding	ZDB-GENE-040912-132			GO:0008289;GO:0001654	lipid binding;eye development	molecular_function;biological_process	PTHR11955_SF80	FATTY ACID BINDING	GO:0003674;GO:0008289;GO:0048856	molecular_function;lipid binding;anatomical structure development
ENSONIG00000002488	ribosomal protein L36A	rpl36a	91.5533	213.401	-2.33003	-1.22035	7.43469	21.301	3.92526e-06	0.00315627	1	protein_coding	ZDB-GENE-020423-1			GO:0005622;GO:0005840;GO:0006412;GO:0003735;GO:0043009;GO:0051726	intracellular;ribosome;translation;structural constituent of ribosome;chordate embryonic development;regulation of cell cycle	cellular_component;biological_process;molecular_function	PTHR10369_SF5	60S RIBOSOMAL L36A	GO:0003674;GO:0005198;GO:0003735;GO:0009058;GO:0034641;GO:0006412;GO:0032991;GO:0005575;GO:0043226;GO:0005840;GO:0005622;GO:0048856;GO:0009790	molecular_function;structural molecule activity;structural constituent of ribosome;biosynthetic process;cellular nitrogen compound metabolic process;translation;protein-containing complex;cellular_component;organelle;ribosome;intracellular;anatomical structure development;embryo development
ENSONIG00000003387	ribosomal protein L12	rpl12	101.597	202.644	-1.99402	-0.995677	7.35253	21.3204	3.88571e-06	0.00315627	1	protein_coding	ZDB-GENE-030131-5297			GO:0005840;GO:0006412;GO:0003735	ribosome;translation;structural constituent of ribosome	cellular_component;biological_process;molecular_function	PTHR11661_SF2	60S RIBOSOMAL L12	GO:0003674;GO:0005198;GO:0003735;GO:0009058;GO:0034641;GO:0006412;GO:0032991;GO:0005575;GO:0043226;GO:0005840	molecular_function;structural molecule activity;structural constituent of ribosome;biosynthetic process;cellular nitrogen compound metabolic process;translation;protein-containing complex;cellular_component;organelle;ribosome
ENSONIG00000004031	retinoid-binding protein 7	rbp7b	0.308681	1.50955	-5.18577	-2.37456	0.0804742	21.5927	3.37125e-06	0.00315627	1	protein_coding	ZDB-GENE-081022-134	100704699	I3J892	GO:0008289	lipid binding	molecular_function	PTHR11955_SF77	RETINOID BINDING 7 CELLULAR RETINOIC ACID BINDING 4 CRABP4 CRBP4 CELLULAR RETINOIC ACID BINDING IV CRABP IV	GO:0003674;GO:0008289	molecular_function;lipid binding
ENSONIG00000006510			1.53426	0	223.449	7.8038	-0.68241	21.4419	3.64723e-06	0.00315627	1	protein_coding
ENSONIG00000012509	ribosomal protein L17	rpl17	180.99	321.605	-1.77641	-0.828967	8.08998	21.3213	3.88391e-06	0.00315627	1	protein_coding	ZDB-GENE-030131-8585	100707041	I3K3Q3	GO:0005622;GO:0005840;GO:0006412;GO:0003735;GO:0015934	intracellular;ribosome;translation;structural constituent of ribosome;large ribosomal subunit	cellular_component;biological_process;molecular_function	PTHR11593	60S RIBOSOMAL L17	GO:0003674;GO:0005198;GO:0003735;GO:0009058;GO:0034641;GO:0006412;GO:0032991;GO:0005575;GO:0043226;GO:0005840;GO:0005622	molecular_function;structural molecule activity;structural constituent of ribosome;biosynthetic process;cellular nitrogen compound metabolic process;translation;protein-containing complex;cellular_component;organelle;ribosome;intracellular
ENSONIG00000018863	ribosomal protein S15a	rps15a	118.53	253.891	-2.14122	-1.09843	7.69483	21.7186	3.1572e-06	0.00315627	1	protein_coding	ZDB-GENE-030131-8708	100698782	I3KRK7	GO:0005840;GO:0006412;GO:0003735;GO:0007420;GO:0030218;GO:0043009;GO:0051726	ribosome;translation;structural constituent of ribosome;brain development;erythrocyte differentiation;chordate embryonic development;regulation of cell cycle	cellular_component;biological_process;molecular_function	PTHR11758	40S RIBOSOMAL	GO:0003674;GO:0005198;GO:0003735;GO:0009058;GO:0034641;GO:0006412;GO:0032991;GO:0005575;GO:0043226;GO:0005840;GO:0048856;GO:0002376;GO:0042592;GO:0030154;GO:0009790	molecular_function;structural molecule activity;structural constituent of ribosome;biosynthetic process;cellular nitrogen compound metabolic process;translation;protein-containing complex;cellular_component;organelle;ribosome;anatomical structure development;immune system process;homeostatic process;cell differentiation;embryo development
ENSONIG00000023151			12.3688	19.4897	-1.57092	-0.651612	4.00987	21.0701	4.42777e-06	0.00340553	2	lincRNA
ENSONIG00000009685			34.8826	59.4457	-1.70213	-0.767337	5.53158	20.9562	4.69912e-06	0.00346364	1	protein_coding				GO:0005515	protein binding	molecular_function	PTHR11571_SF101	GLUTATHIONE S TRANSFERASE EC_2.5.1.18 GST A4 4 GST GLUTATHIONE S TRANSFERASE GST	GO:0003674	molecular_function
ENSONIG00000011225	spleen associated tyrosine kinase	syk	37.2429	26.0409	1.42892	0.514923	4.99608	20.8228	5.03786e-06	0.00356479	2	protein_coding	ZDB-GENE-040702-3	100693670	I3JZ30;I3JZ29	GO:0004715;GO:0004713;GO:0035556;GO:0005737;GO:0006468;GO:0004672;GO:0005524;GO:0016740;GO:0000166;GO:0016301;GO:0016310;GO:0018108;GO:0001946;GO:0090050	non-membrane spanning protein tyrosine kinase activity;protein tyrosine kinase activity;intracellular signal transduction;cytoplasm;protein phosphorylation;protein kinase activity;ATP binding;transferase activity;nucleotide binding;kinase activity;phosphorylation;peptidyl-tyrosine phosphorylation;lymphangiogenesis;positive regulation of cell migration involved in sprouting angiogenesis	molecular_function;biological_process;cellular_component	PTHR24418_SF79	TYROSINE KINASE SYK EC_2.7.10.2 SPLEEN TYROSINE KINASE	GO:0003674;GO:0043167;GO:0016301;GO:0006464;GO:0005575;GO:0005737;GO:0007165;GO:0048646	molecular_function;ion binding;kinase activity;cellular protein modification process;cellular_component;cytoplasm;signal transduction;anatomical structure formation involved in morphogenesis	04660+2.7.10.2
ENSONIG00000001057	somatostatin 1, tandem duplicate 1	sst1.1	10.267	19.766	-1.92151	-0.94224	4.00758	20.6385	5.54684e-06	0.00377398	1	protein_coding	ZDB-GENE-030131-4743			GO:0005179;GO:0005576;GO:0010469	hormone activity;extracellular region;regulation of signaling receptor activity	molecular_function;cellular_component;biological_process	PTHR10558	SOMATOSTATIN SOMATOSTATIN SOMATOSTATIN	GO:0005575;GO:0005576;GO:0003674;GO:0008150	cellular_component;extracellular region;molecular_function;biological_process
ENSONIG00000007508	ribosomal protein L37	rpl37	33.7741	84.4316	-2.49784	-1.32068	6.08382	20.409	6.25341e-06	0.00409714	1	protein_coding	ZDB-GENE-040625-39			GO:0005622;GO:0005840;GO:0006412;GO:0003735;GO:0046872;GO:0003723;GO:0019843	intracellular;ribosome;translation;structural constituent of ribosome;metal ion binding;RNA binding;rRNA binding	cellular_component;biological_process;molecular_function	PTHR10768_SF1	60S RIBOSOMAL L37	GO:0003674;GO:0005198;GO:0003735;GO:0009058;GO:0034641;GO:0006412;GO:0032991;GO:0005575;GO:0043226;GO:0005840;GO:0005622;GO:0043167;GO:0003723;GO:0019843	molecular_function;structural molecule activity;structural constituent of ribosome;biosynthetic process;cellular nitrogen compound metabolic process;translation;protein-containing complex;cellular_component;organelle;ribosome;intracellular;ion binding;RNA binding;rRNA binding
ENSONIG00000006539	ribosomal protein L18	rpl18	122.347	216.172	-1.76636	-0.820779	7.52602	20.1467	7.17256e-06	0.00450318	1	protein_coding		100534549	P69091	GO:0005622;GO:0005840;GO:0006412;GO:0003735;GO:0005737;GO:0005783;GO:0005829;GO:0002181;GO:0005791;GO:0022625;GO:0042788	intracellular;ribosome;translation;structural constituent of ribosome;cytoplasm;endoplasmic reticulum;cytosol;cytoplasmic translation;rough endoplasmic reticulum;cytosolic large ribosomal subunit;polysomal ribosome	cellular_component;biological_process;molecular_function	PTHR10934	60S RIBOSOMAL L18	GO:0003674;GO:0005198;GO:0003735;GO:0009058;GO:0034641;GO:0006412;GO:0032991;GO:0005575;GO:0043226;GO:0005840;GO:0005622;GO:0005737;GO:0005783;GO:0005829	molecular_function;structural molecule activity;structural constituent of ribosome;biosynthetic process;cellular nitrogen compound metabolic process;translation;protein-containing complex;cellular_component;organelle;ribosome;intracellular;cytoplasm;endoplasmic reticulum;cytosol
ENSONIG00000014692	ribosomal protein, large P2	rplp2	103.352	231.511	-2.23914	-1.16295	7.58469	20.0267	7.63682e-06	0.00450318	1	protein_coding	ZDB-GENE-031018-2			GO:0006414;GO:0005622;GO:0005840;GO:0003735	translational elongation;intracellular;ribosome;structural constituent of ribosome	biological_process;cellular_component;molecular_function	PTHR21141_SF5	60S ACIDIC RIBOSOMAL P2	GO:0003674;GO:0005198;GO:0003735;GO:0032991;GO:0005575;GO:0043226;GO:0005840;GO:0005622;GO:0009058	molecular_function;structural molecule activity;structural constituent of ribosome;protein-containing complex;cellular_component;organelle;ribosome;intracellular;biosynthetic process
ENSONIG00000020785	tubulin folding cofactor C	tbcc	31.5956	22.0131	1.43482	0.52087	4.77064	20.0274	7.63421e-06	0.00450318	1	protein_coding	ZDB-GENE-041008-103			GO:0015631;GO:0000902;GO:0007023;GO:0000166;GO:0005525	tubulin binding;cell morphogenesis;post-chaperonin tubulin folding pathway;nucleotide binding;GTP binding	molecular_function;biological_process	PTHR15139	TUBULIN SPECIFIC CHAPERONE C TUBULIN FOLDING COFACTOR C CFC	GO:0006457;GO:0000902;GO:0003674;GO:0008092;GO:0043167	protein folding;cell morphogenesis;molecular_function;cytoskeletal protein binding;ion binding
ENSONIG00000025951			1.08338	0	158.085	7.30456	-1.06482	19.926	8.04982e-06	0.00459359	1	lincRNA
ENSONIG00000000019	exportin 1 (CRM1 homolog, yeast) a	xpo1a	85.7546	62.8253	1.36464	0.448522	6.20884	19.753	8.81237e-06	0.00476151	2	protein_coding	ZDB-GENE-050309-201		I3ITT5;I3ITT4	GO:0005049;GO:0006886;GO:0008536;GO:0005634;GO:0051168;GO:0007420	nuclear export signal receptor activity;intracellular protein transport;Ran GTPase binding;nucleus;nuclear export;brain development	molecular_function;biological_process;cellular_component	PTHR11223	EXPORTIN 1 CHROMOSOME REGION MAINTENANCE 1	GO:0006810;GO:0003674;GO:0006913;GO:0005575;GO:0043226;GO:0005634;GO:0048856	transport;molecular_function;nucleocytoplasmic transport;cellular_component;organelle;nucleus;anatomical structure development
ENSONIG00000014130	ribosomal protein L21	rpl21	139.599	297.994	-2.13421	-1.0937	7.91969	19.7379	8.8824e-06	0.00476151	1	protein_coding	ZDB-GENE-030131-8512	100711190	I3K9H1	GO:0005622;GO:0005840;GO:0006412;GO:0003735	intracellular;ribosome;translation;structural constituent of ribosome	cellular_component;biological_process;molecular_function	PTHR20981	60S RIBOSOMAL L21	GO:0003674;GO:0005198;GO:0003735;GO:0009058;GO:0034641;GO:0006412;GO:0032991;GO:0005575;GO:0043226;GO:0005840;GO:0005622	molecular_function;structural molecule activity;structural constituent of ribosome;biosynthetic process;cellular nitrogen compound metabolic process;translation;protein-containing complex;cellular_component;organelle;ribosome;intracellular
ENSONIG00000022008	small nucleolar RNA, H/ACA box 74B	RF00090	0.318173	1.90249	-5.67296	-2.5041	0.341611	19.6575	9.26371e-06	0.00481985	1	snoRNA
ENSONIG00000003560	ribosomal protein L13a	rpl13a	247.395	389.195	-1.57288	-0.653407	8.42333	19.4798	1.01669e-05	0.00513865	1	protein_coding	ZDB-GENE-030131-168	100708460	I3J6J1	GO:0005840;GO:0006412;GO:0003735;GO:0015934	ribosome;translation;structural constituent of ribosome;large ribosomal subunit	cellular_component;biological_process;molecular_function	PTHR11545_SF3	60S RIBOSOMAL	GO:0003674;GO:0005198;GO:0003735;GO:0009058;GO:0034641;GO:0006412;GO:0032991;GO:0005575;GO:0043226;GO:0005840	molecular_function;structural molecule activity;structural constituent of ribosome;biosynthetic process;cellular nitrogen compound metabolic process;translation;protein-containing complex;cellular_component;organelle;ribosome
ENSONIG00000019760	lysine (K)-specific methyltransferase 2Ba	kmt2ba	22.605	36.3805	-1.6051	-0.682662	4.85546	19.4171	1.05064e-05	0.00516273	1	protein_coding	ZDB-GENE-060503-376			GO:0008270;GO:0005634;GO:0003677;GO:0005515;GO:0016740;GO:0046872;GO:0008168;GO:0032259;GO:0018024;GO:0034968	zinc ion binding;nucleus;DNA binding;protein binding;transferase activity;metal ion binding;methyltransferase activity;methylation;histone-lysine N-methyltransferase activity;histone lysine methylation	molecular_function;cellular_component;biological_process	PTHR22884_SF318	HISTONE LYSINE N METHYLTRANSFERASE TRITHORAX EC_2.1.1.43	GO:0003674;GO:0003677;GO:0005575;GO:0043226;GO:0005634;GO:0043167;GO:0008168;GO:0006464	molecular_function;DNA binding;cellular_component;organelle;nucleus;ion binding;methyltransferase activity;cellular protein modification process	00310+2.1.1.43
ENSONIG00000016166	ribosomal protein S19	rps19	134.263	242.495	-1.80541	-0.852326	7.6869	19.2154	1.16765e-05	0.00558265	1	protein_coding	ZDB-GENE-040426-1716			GO:0005622;GO:0005840;GO:0006412;GO:0003735;GO:0030218;GO:0035284;GO:0042541;GO:0043009;GO:0045088;GO:0045646;GO:0048821;GO:0072332	intracellular;ribosome;translation;structural constituent of ribosome;erythrocyte differentiation;brain segmentation;hemoglobin biosynthetic process;chordate embryonic development;regulation of innate immune response;regulation of erythrocyte differentiation;erythrocyte development;intrinsic apoptotic signaling pathway by p53 class mediator	cellular_component;biological_process;molecular_function	PTHR11710_SF1	40S RIBOSOMAL S19	GO:0003674;GO:0005198;GO:0003735;GO:0009058;GO:0034641;GO:0006412;GO:0032991;GO:0005575;GO:0043226;GO:0005840;GO:0005622;GO:0002376;GO:0042592;GO:0030154;GO:0048856;GO:0009790;GO:0008150;GO:0007165	molecular_function;structural molecule activity;structural constituent of ribosome;biosynthetic process;cellular nitrogen compound metabolic process;translation;protein-containing complex;cellular_component;organelle;ribosome;intracellular;immune system process;homeostatic process;cell differentiation;anatomical structure development;embryo development;biological_process;signal transduction
ENSONIG00000019064	ribosomal protein S26	rps26	105.212	221.021	-2.09995	-1.07036	7.51765	19.1039	1.23789e-05	0.00576272	1	protein_coding	ZDB-GENE-030131-8606	100700449	I3KSA7	GO:0005622;GO:0005840;GO:0006412;GO:0003735	intracellular;ribosome;translation;structural constituent of ribosome	cellular_component;biological_process;molecular_function	PTHR12538	40S RIBOSOMAL S26	GO:0003674;GO:0005198;GO:0003735;GO:0009058;GO:0034641;GO:0006412;GO:0032991;GO:0005575;GO:0043226;GO:0005840;GO:0005622	molecular_function;structural molecule activity;structural constituent of ribosome;biosynthetic process;cellular nitrogen compound metabolic process;translation;protein-containing complex;cellular_component;organelle;ribosome;intracellular
ENSONIG00000001300	ribosomal protein S11	si:dkey-159f12.2	149.963	296.332	-1.97552	-0.982232	7.94506	18.9252	1.35942e-05	0.00601202	1	protein_coding	ZDB-GENE-081105-168	100696602	I3IYF1	GO:0005622;GO:0005840;GO:0006412;GO:0003735	intracellular;ribosome;translation;structural constituent of ribosome	cellular_component;biological_process;molecular_function	PTHR10744_SF6	40S RIBOSOMAL S11	GO:0003674;GO:0005198;GO:0003735;GO:0009058;GO:0034641;GO:0006412;GO:0032991;GO:0005575;GO:0043226;GO:0005840;GO:0005622	molecular_function;structural molecule activity;structural constituent of ribosome;biosynthetic process;cellular nitrogen compound metabolic process;translation;protein-containing complex;cellular_component;organelle;ribosome;intracellular
ENSONIG00000009071	transmembrane protein 169	tmem169b	163.644	109.535	1.49381	0.578995	7.06263	18.9279	1.35756e-05	0.00601202	1	protein_coding	ZDB-GENE-141211-51	100711037	I3JRB4	GO:0016020;GO:0016021	membrane;integral component of membrane	cellular_component	PTHR31777	TRANSMEMBRANE 169	GO:0005575	cellular_component
ENSONIG00000015488	ARFGEF family member 3	arfgef3	27.9256	48.1918	-1.72292	-0.784855	5.11584	18.6396	1.57903e-05	0.00681294	1	protein_coding	ZDB-GENE-081107-37			GO:0032012;GO:0005086	regulation of ARF protein signal transduction;ARF guanyl-nucleotide exchange factor activity	biological_process;molecular_function	TF638465	BREFELDIN A INHIBITED GUANINE NUCLEOTIDE EXCHANGE 3 ARFGEF FAMILY MEMBER 3	GO:0003674	molecular_function
ENSONIG00000002672	ribosomal protein L30	rpl30	146.724	258.487	-1.76137	-0.816696	7.83816	18.4626	1.73269e-05	0.00682859	1	protein_coding	ZDB-GENE-030131-8657	100710306	I3J3A6	GO:0005622;GO:0003723;GO:0005840;GO:0006412;GO:0003735	intracellular;RNA binding;ribosome;translation;structural constituent of ribosome	cellular_component;molecular_function;biological_process	PTHR11449	60S RIBOSOMAL L30	GO:0003674;GO:0005198;GO:0003735;GO:0009058;GO:0034641;GO:0006412;GO:0032991;GO:0005575;GO:0043226;GO:0005840;GO:0003723;GO:0005622	molecular_function;structural molecule activity;structural constituent of ribosome;biosynthetic process;cellular nitrogen compound metabolic process;translation;protein-containing complex;cellular_component;organelle;ribosome;RNA binding;intracellular
ENSONIG00000010495	ribosomal protein S15	rps15	167.986	269.943	-1.60662	-0.684033	7.91953	18.5279	1.67439e-05	0.00682859	1	protein_coding	ZDB-GENE-030131-9092			GO:0015935;GO:0003723;GO:0005840;GO:0006412;GO:0003735;GO:0043009	small ribosomal subunit;RNA binding;ribosome;translation;structural constituent of ribosome;chordate embryonic development	cellular_component;molecular_function;biological_process	PTHR11880	40S RIBOSOMAL S15	GO:0003674;GO:0005198;GO:0003735;GO:0009058;GO:0034641;GO:0006412;GO:0032991;GO:0005575;GO:0043226;GO:0005840;GO:0003723;GO:0048856;GO:0009790	molecular_function;structural molecule activity;structural constituent of ribosome;biosynthetic process;cellular nitrogen compound metabolic process;translation;protein-containing complex;cellular_component;organelle;ribosome;RNA binding;anatomical structure development;embryo development
ENSONIG00000012247	ribosomal protein L31	rpl31	206.94	406.63	-1.96455	-0.974201	8.44092	18.4878	1.70997e-05	0.00682859	1	protein_coding	ZDB-GENE-060331-121		I3K2S9	GO:0005622;GO:0005840;GO:0006412;GO:0003735	intracellular;ribosome;translation;structural constituent of ribosome	cellular_component;biological_process;molecular_function	PTHR10956	60S RIBOSOMAL L31	GO:0003674;GO:0005198;GO:0003735;GO:0009058;GO:0034641;GO:0006412;GO:0032991;GO:0005575;GO:0043226;GO:0005840;GO:0005622	molecular_function;structural molecule activity;structural constituent of ribosome;biosynthetic process;cellular nitrogen compound metabolic process;translation;protein-containing complex;cellular_component;organelle;ribosome;intracellular
ENSONIG00000015448	ribosomal protein L14	rpl14	109.86	221.304	-2.01372	-1.00986	7.511	18.4578	1.73706e-05	0.00682859	1	protein_coding	ZDB-GENE-030131-2085	100534449	I3KE93	GO:0005622;GO:0003723;GO:0005840;GO:0006412;GO:0003735	intracellular;RNA binding;ribosome;translation;structural constituent of ribosome	cellular_component;molecular_function;biological_process	PTHR11127	60S RIBOSOMAL L14	GO:0003674;GO:0005198;GO:0003735;GO:0009058;GO:0034641;GO:0006412;GO:0032991;GO:0005575;GO:0043226;GO:0005840;GO:0003723;GO:0005622	molecular_function;structural molecule activity;structural constituent of ribosome;biosynthetic process;cellular nitrogen compound metabolic process;translation;protein-containing complex;cellular_component;organelle;ribosome;RNA binding;intracellular
ENSONIG00000017676	60S ribosomal protein L26	rpl26	200.734	343.813	-1.71246	-0.776071	8.23165	18.3041	1.883e-05	0.00724138	1	protein_coding	ZDB-GENE-040426-2117	100708525	I3KME3	GO:0005622;GO:0005840;GO:0006412;GO:0003735;GO:0015934;GO:0007634;GO:0060059	intracellular;ribosome;translation;structural constituent of ribosome;large ribosomal subunit;optokinetic behavior;embryonic retina morphogenesis in camera-type eye	cellular_component;biological_process;molecular_function	PTHR11143	60S RIBOSOMAL L26	GO:0003674;GO:0005198;GO:0003735;GO:0009058;GO:0034641;GO:0006412;GO:0032991;GO:0005575;GO:0043226;GO:0005840;GO:0005622	molecular_function;structural molecule activity;structural constituent of ribosome;biosynthetic process;cellular nitrogen compound metabolic process;translation;protein-containing complex;cellular_component;organelle;ribosome;intracellular
ENSONIG00000000006	ribosomal protein S16	rps16	134.971	231.942	-1.71796	-0.780694	7.68445	18.1569	2.03427e-05	0.00749714	1	protein_coding	ZDB-GENE-050506-107	100703910	I3ITR9	GO:0005840;GO:0006412;GO:0003735	ribosome;translation;structural constituent of ribosome	cellular_component;biological_process;molecular_function	PTHR21569_SF4	40S RIBOSOMAL S16	GO:0003674;GO:0005198;GO:0003735;GO:0009058;GO:0034641;GO:0006412;GO:0032991;GO:0005575;GO:0043226;GO:0005840	molecular_function;structural molecule activity;structural constituent of ribosome;biosynthetic process;cellular nitrogen compound metabolic process;translation;protein-containing complex;cellular_component;organelle;ribosome
ENSONIG00000005440	ribosomal protein S25	rps25	197.735	368.255	-1.86192	-0.896789	8.30867	18.1655	2.02516e-05	0.00749714	1	protein_coding	ZDB-GENE-040426-1788						PTHR12850	40S RIBOSOMAL S25
ENSONIG00000012015	Rho family GTPase 3	rnd3a	165.417	123.653	1.33708	0.419083	7.15914	17.9451	2.27366e-05	0.00820836	1	protein_coding	ZDB-GENE-010319-40	100690802	I3K1X9	GO:0007264;GO:0003924;GO:0005622;GO:0005525;GO:0000166	small GTPase mediated signal transduction;GTPase activity;intracellular;GTP binding;nucleotide binding	biological_process;molecular_function;cellular_component	PTHR24072_SF24	RHO RELATED GTP BINDING RHOE PRECURSOR RHO FAMILY GTPASE 3 RHO RELATED GTP BINDING RHO8 RND3	GO:0003674;GO:0043167;GO:0005575;GO:0005622;GO:0003924;GO:0007165	molecular_function;ion binding;cellular_component;intracellular;GTPase activity;signal transduction
ENSONIG00000001184	glycine receptor, beta b	glrbb	248.793	193.773	1.2835	0.360085	7.77277	17.7478	2.52204e-05	0.00850426	1	protein_coding	ZDB-GENE-040801-106			GO:0045211;GO:0006821;GO:0016934;GO:0034220;GO:0005230;GO:0005216;GO:0006811;GO:0004888;GO:0016021;GO:0016020;GO:1902476;GO:0034613;GO:0060079	postsynaptic membrane;chloride transport;extracellularly glycine-gated chloride channel activity;ion transmembrane transport;extracellular ligand-gated ion channel activity;ion channel activity;ion transport;transmembrane signaling receptor activity;integral component of membrane;membrane;chloride transmembrane transport;cellular protein localization;excitatory postsynaptic potential	cellular_component;biological_process;molecular_function	PTHR18945_SF29	GLYCINE RECEPTOR SUBUNIT BETA PRECURSOR GLYCINE RECEPTOR 58 KDA SUBUNIT	GO:0005575;GO:0003674;GO:0006810;GO:0022857;GO:0055085;GO:0008150	cellular_component;molecular_function;transport;transmembrane transporter activity;transmembrane transport;biological_process
ENSONIG00000004876	ribosomal protein L23a	rpl23a	287.355	475.514	-1.65455	-0.726443	8.73712	17.4925	2.88443e-05	0.00850426	1	protein_coding	ZDB-GENE-030131-7479	100705596	I3JB93	GO:0005622;GO:0005840;GO:0006412;GO:0003735;GO:0031016;GO:0051726	intracellular;ribosome;translation;structural constituent of ribosome;pancreas development;regulation of cell cycle	cellular_component;biological_process;molecular_function	PTHR11620_SF9	60S RIBOSOMAL L23A	GO:0003674;GO:0005198;GO:0003735;GO:0009058;GO:0034641;GO:0006412;GO:0032991;GO:0005575;GO:0043226;GO:0005840;GO:0005622;GO:0048856	molecular_function;structural molecule activity;structural constituent of ribosome;biosynthetic process;cellular nitrogen compound metabolic process;translation;protein-containing complex;cellular_component;organelle;ribosome;intracellular;anatomical structure development
ENSONIG00000005934	ribosomal protein L13	rpl13	198.588	352.864	-1.7765	-0.829041	8.22475	17.5566	2.78879e-05	0.00850426	1	protein_coding	ZDB-GENE-031007-1	100712089	I3JF29	GO:0005622;GO:0005840;GO:0006412;GO:0003735;GO:0051726	intracellular;ribosome;translation;structural constituent of ribosome;regulation of cell cycle	cellular_component;biological_process;molecular_function	PTHR11722	60S RIBOSOMAL L13	GO:0003674;GO:0005198;GO:0003735;GO:0009058;GO:0034641;GO:0006412;GO:0032991;GO:0005575;GO:0043226;GO:0005840;GO:0005622	molecular_function;structural molecule activity;structural constituent of ribosome;biosynthetic process;cellular nitrogen compound metabolic process;translation;protein-containing complex;cellular_component;organelle;ribosome;intracellular
ENSONIG00000007401	ribosomal protein S18	rps18	162.658	279.972	-1.72064	-0.782944	7.94376	17.6792	2.61465e-05	0.00850426	1	protein_coding	ZDB-GENE-020419-20	100699803	I3JKD8	GO:0005622;GO:0003723;GO:0003676;GO:0005840;GO:0006412;GO:0003735;GO:0051726	intracellular;RNA binding;nucleic acid binding;ribosome;translation;structural constituent of ribosome;regulation of cell cycle	cellular_component;molecular_function;biological_process	PTHR10871	40S RIBOSOMAL S18	GO:0003674;GO:0005198;GO:0003735;GO:0009058;GO:0034641;GO:0006412;GO:0032991;GO:0005575;GO:0043226;GO:0005840;GO:0003723;GO:0005622	molecular_function;structural molecule activity;structural constituent of ribosome;biosynthetic process;cellular nitrogen compound metabolic process;translation;protein-containing complex;cellular_component;organelle;ribosome;RNA binding;intracellular
ENSONIG00000014266	ribosomal protein L24	rpl24	112.369	207.144	-1.8429	-0.88198	7.43735	17.5223	2.83964e-05	0.00850426	1	protein_coding	ZDB-GENE-020419-25	100707648	I3K9Y8				PTHR10792	RIBOSOMAL L24
ENSONIG00000016242	frizzled related protein	frzb	12.2851	19.8522	-1.61809	-0.694293	3.96714	17.6956	2.59224e-05	0.00850426	1	protein_coding	ZDB-GENE-990715-1	100710778	I3KH54	GO:0005515;GO:0005576;GO:0007275;GO:0016055;GO:0035988	protein binding;extracellular region;multicellular organism development;Wnt signaling pathway;chondrocyte proliferation	molecular_function;cellular_component;biological_process	PTHR11309_SF83	FRIZZLED RELATED	GO:0003674;GO:0005575;GO:0005576;GO:0048856;GO:0007165;GO:0008283	molecular_function;cellular_component;extracellular region;anatomical structure development;signal transduction;cell population proliferation
ENSONIG00000017987	60S ribosomal protein L22		64.198	122.471	-1.90624	-0.930733	6.70177	17.6222	2.69425e-05	0.00850426	1	protein_coding		100699599		GO:0005622;GO:0005840;GO:0006412;GO:0003735	intracellular;ribosome;translation;structural constituent of ribosome	cellular_component;biological_process;molecular_function	PTHR10064_SF2	60S RIBOSOMAL L22	GO:0003674;GO:0005198;GO:0003735;GO:0009058;GO:0034641;GO:0006412;GO:0032991;GO:0005575;GO:0043226;GO:0005840;GO:0005622	molecular_function;structural molecule activity;structural constituent of ribosome;biosynthetic process;cellular nitrogen compound metabolic process;translation;protein-containing complex;cellular_component;organelle;ribosome;intracellular
ENSONIG00000019509	ras-related protein Rab-37		99.4445	72.5193	1.37104	0.455271	6.41721	17.4968	2.87796e-05	0.00850426	1	protein_coding		100707685	I3KTW1	GO:0003924;GO:0005525	GTPase activity;GTP binding	molecular_function	PTHR24073_SF381	RAS RELATED RAB 37 PRECURSOR	GO:0003674;GO:0043167;GO:0003924	molecular_function;ion binding;GTPase activity
ENSONIG00000021883	RNA, 7SK small nuclear	RF00100	11.611	36.0995	-3.10486	-1.63453	4.76039	17.6784	2.61584e-05	0.00850426	1	misc_RNA
ENSONIG00000022844			15.2969	30.5415	-1.99379	-0.995511	4.28624	17.5816	2.75245e-05	0.00850426	1	lincRNA
ENSONIG00000022881			0.442839	1.62389	-3.57688	-1.8387	0.400452	17.7687	2.49452e-05	0.00850426	1	lincRNA
ENSONIG00000006857	ribosomal protein L8	rpl8	184.438	277.322	-1.5033	-0.588135	7.95314	17.3165	3.16435e-05	0.0090871	1	protein_coding	ZDB-GENE-040426-1670	100706674	I3JIF9	GO:0003723;GO:0005840;GO:0006412;GO:0003735;GO:0015934	RNA binding;ribosome;translation;structural constituent of ribosome;large ribosomal subunit	molecular_function;cellular_component;biological_process	PTHR13691	RIBOSOMAL	GO:0003674;GO:0005198;GO:0003735;GO:0009058;GO:0034641;GO:0006412;GO:0032991;GO:0005575;GO:0043226;GO:0005840;GO:0003723	molecular_function;structural molecule activity;structural constituent of ribosome;biosynthetic process;cellular nitrogen compound metabolic process;translation;protein-containing complex;cellular_component;organelle;ribosome;RNA binding
ENSONIG00000014744	ribosomal protein S10	rps10	196.077	306.604	-1.56341	-0.644697	8.11871	17.3042	3.18485e-05	0.0090871	2	protein_coding	ZDB-GENE-040426-1481	100708197	I3KBR9;I3KBR8				PTHR12146_SF1	40S RIBOSOMAL S10
ENSONIG00000016452	G protein-activated inward rectifier potassium channel 1	kcnj19b	87.0361	65.0399	1.338	0.420079	6.27227	17.2383	3.29717e-05	0.00925824	2	protein_coding	ZDB-GENE-121214-60	100690095	I3KHX6;I3KHX7	GO:0015467;GO:0005242;GO:0006813;GO:0016021;GO:0016020;GO:0005244;GO:0006811;GO:0034220;GO:0034765;GO:0071805	G-protein activated inward rectifier potassium channel activity;inward rectifier potassium channel activity;potassium ion transport;integral component of membrane;membrane;voltage-gated ion channel activity;ion transport;ion transmembrane transport;regulation of ion transmembrane transport;potassium ion transmembrane transport	molecular_function;biological_process;cellular_component	PTHR11767	INWARD RECTIFIER POTASSIUM CHANNEL INWARD RECTIFIER K + CHANNEL POTASSIUM CHANNEL INWARDLY RECTIFYING SUBFAMILY J MEMBER	GO:0005575;GO:0006810;GO:0022857;GO:0003674;GO:0055085	cellular_component;transport;transmembrane transporter activity;molecular_function;transmembrane transport
ENSONIG00000010857			5.48957	9.53666	-1.73747	-0.796985	2.97245	17.1275	3.49532e-05	0.00951266	1	protein_coding				GO:0006351;GO:0003899	transcription, DNA-templated;DNA-directed 5'-3' RNA polymerase activity	biological_process;molecular_function			GO:0016779;GO:0009058;GO:0034641	nucleotidyltransferase activity;biosynthetic process;cellular nitrogen compound metabolic process
ENSONIG00000017838	ribosomal protein S14	rps14	137.723	269.709	-1.95788	-0.969295	7.81613	17.133	3.48515e-05	0.00951266	1	protein_coding	ZDB-GENE-030131-8631	100696222	I3KMZ3	GO:0005840;GO:0006412;GO:0003735;GO:0043009;GO:0043249;GO:0048821	ribosome;translation;structural constituent of ribosome;chordate embryonic development;erythrocyte maturation;erythrocyte development	cellular_component;biological_process;molecular_function	PTHR11759_SF1	40S RIBOSOMAL S14	GO:0003674;GO:0005198;GO:0003735;GO:0009058;GO:0034641;GO:0006412;GO:0032991;GO:0005575;GO:0043226;GO:0005840;GO:0048856;GO:0009790;GO:0021700	molecular_function;structural molecule activity;structural constituent of ribosome;biosynthetic process;cellular nitrogen compound metabolic process;translation;protein-containing complex;cellular_component;organelle;ribosome;anatomical structure development;embryo development;developmental maturation
ENSONIG00000024746			0.217059	1.03471	-4.49716	-2.16901	-0.500851	17.0532	3.63475e-05	0.00974222	1	lincRNA
ENSONIG00000000629	peptidyl-prolyl cis-trans isomerase	ppiab	123.918	196.77	-1.5872	-0.666485	7.40638	16.967	3.80358e-05	0.0098949	1	protein_coding	ZDB-GENE-030131-7459	100699155	I3IW09	GO:0000413;GO:0003755;GO:0006457;GO:0016853	protein peptidyl-prolyl isomerization;peptidyl-prolyl cis-trans isomerase activity;protein folding;isomerase activity	biological_process;molecular_function	PTHR11071_SF191	PEPTIDYL PROLYL CIS TRANS ISOMERASE PPIASE EC_5.2.1.8 CYCLOPHILIN CYCLOSPORIN A BINDING EGCYP 1 ROTAMASE	GO:0006457;GO:0016853;GO:0006464	protein folding;isomerase activity;cellular protein modification process
ENSONIG00000024667			1.73395	0.316713	5.36874	2.42458	-0.0438663	16.97	3.79744e-05	0.0098949	1	lincRNA
ENSONIG00000001662			0.401549	1.66546	-4.15651	-2.05537	0.322789	16.8349	4.07755e-05	0.0104539	1	protein_coding							PTHR15002_SF0	RIBOSOMAL BIOGENESIS LAS1L LAS1 HOMOLOG
ENSONIG00000017358	ribosomal protein L32	rpl32	175.874	321.445	-1.82723	-0.869658	8.11602	16.6438	4.50979e-05	0.0113969	1	protein_coding	ZDB-GENE-060331-105			GO:0005622;GO:0005840;GO:0006412;GO:0003735	intracellular;ribosome;translation;structural constituent of ribosome	cellular_component;biological_process;molecular_function	PTHR23413_SF7	60S RIBOSOMAL L32 RIBOSOMAL 49	GO:0003674;GO:0005198;GO:0003735;GO:0009058;GO:0034641;GO:0006412;GO:0032991;GO:0005575;GO:0043226;GO:0005840;GO:0005622	molecular_function;structural molecule activity;structural constituent of ribosome;biosynthetic process;cellular nitrogen compound metabolic process;translation;protein-containing complex;cellular_component;organelle;ribosome;intracellular
ENSONIG00000004296	ribosomal protein S23	rps23	142.146	277.237	-1.94983	-0.963345	7.8866	16.5355	4.77474e-05	0.0115866	1	protein_coding	ZDB-GENE-080220-50	100690746	I3J976	GO:0015935;GO:0005840;GO:0006412;GO:0003735	small ribosomal subunit;ribosome;translation;structural constituent of ribosome	cellular_component;biological_process;molecular_function	PTHR11652_SF14	40S RIBOSOMAL S23	GO:0003674;GO:0005198;GO:0003735;GO:0009058;GO:0034641;GO:0006412;GO:0032991;GO:0005575;GO:0043226;GO:0005840	molecular_function;structural molecule activity;structural constituent of ribosome;biosynthetic process;cellular nitrogen compound metabolic process;translation;protein-containing complex;cellular_component;organelle;ribosome
ENSONIG00000010625	calcium-binding protein 7		119.358	91.6782	1.30244	0.381212	6.70521	16.5329	4.78138e-05	0.0115866	1	protein_coding		100703466	I3JWW3	GO:0005509;GO:0016020;GO:0016021;GO:0046872	calcium ion binding;membrane;integral component of membrane;metal ion binding	molecular_function;cellular_component	PTHR23050_SF22	CALCIUM BINDING 7 CABP7 CALNEURON II CALNEURON 2	GO:0003674;GO:0043167;GO:0005575	molecular_function;ion binding;cellular_component
ENSONIG00000020134	charged multivesicular body protein 3	chmp3	80.7823	53.0788	1.52137	0.605373	6.20388	16.5344	4.77753e-05	0.0115866	1	protein_coding	ZDB-GENE-040426-2600	100706149	I3KW69	GO:0007034	vacuolar transport	biological_process	PTHR10476	CHARGED MULTIVESICULAR BODY CHROMATIN MODIFYING	GO:0006810;GO:0007034	transport;vacuolar transport
ENSONIG00000018086			55.2735	76.2711	-1.38053	-0.465218	6.08902	16.3733	5.20125e-05	0.0124338	1	protein_coding			I3KNU2	GO:0006629;GO:0016020;GO:0016021	lipid metabolic process;membrane;integral component of membrane	biological_process;cellular_component	PTHR19353	ACYL DESATURASE DELTA FATTY ACID DESATURASE DELTA FATTY ACID DESATURASE	GO:0006629;GO:0005575	lipid metabolic process;cellular_component
ENSONIG00000026856			0.457089	2.57504	-5.67959	-2.50579	0.279749	16.3246	5.33654e-05	0.0125871	1	lincRNA
ENSONIG00000000434	survival motor neuron domain containing 1	smndc1	185.94	143.696	1.29367	0.371472	7.41886	16.208	5.67546e-05	0.0132104	1	protein_coding	ZDB-GENE-030131-614	100697211	I3IVB0	GO:0006397;GO:0005737;GO:0003723;GO:0005634	mRNA processing;cytoplasm;RNA binding;nucleus	biological_process;cellular_component;molecular_function	PTHR12664	SURVIVAL OF MOTOR NEURON RELATED SPLICING FACTOR 30 SURVIVAL MOTOR NEURON DOMAIN CONTAINING 1	GO:0005575;GO:0043226;GO:0005634;GO:0003674;GO:0003723;GO:0005737;GO:0034641;GO:0006397	cellular_component;organelle;nucleus;molecular_function;RNA binding;cytoplasm;cellular nitrogen compound metabolic process;mRNA processing
ENSONIG00000014882	ribosomal protein S21	rps21	65.5643	147.817	-2.25331	-1.17205	6.92881	16.1282	5.91963e-05	0.0132555	1	protein_coding	ZDB-GENE-040426-1102	100701551	I3KC87	GO:0005622;GO:0005840;GO:0006412;GO:0003735	intracellular;ribosome;translation;structural constituent of ribosome	cellular_component;biological_process;molecular_function	PTHR10442_SF0	40S RIBOSOMAL S21	GO:0003674;GO:0005198;GO:0003735;GO:0009058;GO:0034641;GO:0006412;GO:0032991;GO:0005575;GO:0043226;GO:0005840;GO:0005622	molecular_function;structural molecule activity;structural constituent of ribosome;biosynthetic process;cellular nitrogen compound metabolic process;translation;protein-containing complex;cellular_component;organelle;ribosome;intracellular
ENSONIG00000019959	potassium channel tetramerization domain containing 5	kctd5a	125.812	94.3172	1.3331	0.41478	6.79602	16.1367	5.89305e-05	0.0132555	1	protein_coding	ZDB-GENE-030131-727	100696055	I3KVJ3	GO:0051260;GO:0005515	protein homooligomerization;protein binding	biological_process;molecular_function	PTHR14958_SF12	BTB/POZ DOMAIN CONTAINING KCTD5	GO:0003674;GO:0022607;GO:0065003	molecular_function;cellular component assembly;protein-containing complex assembly
ENSONIG00000024770			0.387141	1.64465	-4.14296	-2.05066	-0.144741	16.1692	5.79273e-05	0.0132555	1	lincRNA
ENSONIG00000007486	ribosomal protein L28	rpl28	223.064	358.34	-1.60624	-0.683689	8.33027	16.0358	6.21562e-05	0.0137443	1	protein_coding	ZDB-GENE-040930-10	100704095	I3JKP6	GO:0005622;GO:0005840;GO:0006412;GO:0003735;GO:0043009	intracellular;ribosome;translation;structural constituent of ribosome;chordate embryonic development	cellular_component;biological_process;molecular_function	PTHR10544_SF0	60S RIBOSOMAL L28	GO:0003674;GO:0005198;GO:0003735;GO:0009058;GO:0034641;GO:0006412;GO:0032991;GO:0005575;GO:0043226;GO:0005840;GO:0005622;GO:0048856;GO:0009790	molecular_function;structural molecule activity;structural constituent of ribosome;biosynthetic process;cellular nitrogen compound metabolic process;translation;protein-containing complex;cellular_component;organelle;ribosome;intracellular;anatomical structure development;embryo development
ENSONIG00000013655	tetratricopeptide repeat protein 39B	ttc39b	32.2292	22.6716	1.42277	0.508697	4.80256	15.8975	6.68668e-05	0.0146034	2	protein_coding	ZDB-GENE-170303-3	100696033	I3K7T3;I3K7T2	GO:0005515	protein binding	molecular_function	PTHR31859	TETRATRICOPEPTIDE REPEAT TPR REPEAT	GO:0003674	molecular_function
ENSONIG00000012496	protein phosphatase 1 regulatory subunit 3B	ppp1r3b	0.880958	0.168434	4.96847	2.3128	-0.310212	15.8091	7.00641e-05	0.0149329	1	protein_coding	ZDB-GENE-030131-5496	100700587	I3K3N9	GO:0000164;GO:0019888;GO:0005515;GO:0005981;GO:0005975;GO:0043666;GO:0005977	protein phosphatase type 1 complex;protein phosphatase regulator activity;protein binding;regulation of glycogen catabolic process;carbohydrate metabolic process;regulation of phosphoprotein phosphatase activity;glycogen metabolic process	cellular_component;molecular_function;biological_process	PTHR12307_SF13	PHOSPHATASE 1 REGULATORY SUBUNIT 3B	GO:0003674;GO:0008150;GO:0030234;GO:0032991;GO:0005575;GO:0005975;GO:0006091	molecular_function;biological_process;enzyme regulator activity;protein-containing complex;cellular_component;carbohydrate metabolic process;generation of precursor metabolites and energy
ENSONIG00000014275	ornithine carbamoyltransferase	otc	2.13167	5.99719	-2.79241	-1.48151	1.85076	15.8286	6.93449e-05	0.0149329	1	protein_coding	ZDB-GENE-070912-422	100708459	I3K9Z9	GO:0006520;GO:0016597;GO:0016743;GO:0016740	cellular amino acid metabolic process;amino acid binding;carboxyl- or carbamoyltransferase activity;transferase activity	biological_process;molecular_function	PTHR11405_SF1	ORNITHINE CARBAMOYLTRANSFERASE MITOCHONDRIAL PRECURSOR EC_2.1.3.3 ORNITHINE TRANSCARBAMYLASE OTCASE	GO:0044281;GO:0006520;GO:0003674;GO:0043167	small molecule metabolic process;cellular amino acid metabolic process;molecular_function;ion binding	00220+2.1.3.3
ENSONIG00000007736	ribosomal protein L36	rpl36	256.947	512.348	-1.99371	-0.995458	8.77207	15.6723	7.53204e-05	0.0158621	1	protein_coding	ZDB-GENE-040622-2			GO:0005622;GO:0005840;GO:0006412;GO:0003735;GO:0007420;GO:0051726	intracellular;ribosome;translation;structural constituent of ribosome;brain development;regulation of cell cycle	cellular_component;biological_process;molecular_function	PTHR10114_SF1	60S RIBOSOMAL L36	GO:0003674;GO:0005198;GO:0003735;GO:0009058;GO:0034641;GO:0006412;GO:0032991;GO:0005575;GO:0043226;GO:0005840;GO:0005622;GO:0048856	molecular_function;structural molecule activity;structural constituent of ribosome;biosynthetic process;cellular nitrogen compound metabolic process;translation;protein-containing complex;cellular_component;organelle;ribosome;intracellular;anatomical structure development
ENSONIG00000012814	peptidylprolyl isomerase B	ppib	130.07	173.558	-1.33342	-0.415136	7.29245	15.5823	7.899e-05	0.0164392	1	protein_coding	ZDB-GENE-040426-1955	100710408	I3K4T4	GO:0000413;GO:0003755;GO:0006457;GO:0016853	protein peptidyl-prolyl isomerization;peptidyl-prolyl cis-trans isomerase activity;protein folding;isomerase activity	biological_process;molecular_function	PTHR11071_SF63	PEPTIDYL PROLYL CIS TRANS ISOMERASE B PRECURSOR PPIASE B EC_5.2.1.8 CYCLOPHILIN B ROTAMASE B S CYCLOPHILIN SCYLP	GO:0006457;GO:0016853;GO:0006464	protein folding;isomerase activity;cellular protein modification process
ENSONIG00000011175	Rho guanine nucleotide exchange factor (GEF) 28a	arhgef28a	3.59751	7.26191	-2.00177	-1.00127	2.30459	15.4954	8.27053e-05	0.0170123	1	protein_coding	ZDB-GENE-060531-28			GO:0005085;GO:0035556;GO:0035023;GO:0005089;GO:0046872;GO:0007030;GO:0007160;GO:0060415	guanyl-nucleotide exchange factor activity;intracellular signal transduction;regulation of Rho protein signal transduction;Rho guanyl-nucleotide exchange factor activity;metal ion binding;Golgi organization;cell-matrix adhesion;muscle tissue morphogenesis	molecular_function;biological_process	PTHR22825_SF4	RHO GUANINE NUCLEOTIDE EXCHANGE FACTOR 28.190 KDA GUANINE NUCLEOTIDE EXCHANGE FACTOR P190 RHOGEF P190RHOGEF RHO GUANINE NUCLEOTIDE EXCHANGE FACTOR	GO:0003674;GO:0007165;GO:0043167;GO:0007155	molecular_function;signal transduction;ion binding;cell adhesion
ENSONIG00000011286	ribosomal protein L7a	RPL7A	346.245	506.505	-1.46271	-0.548646	8.84596	15.4272	8.5747e-05	0.0174352	1	protein_coding		100693537	I3JZB0	GO:1990904;GO:0042254	ribonucleoprotein complex;ribosome biogenesis	cellular_component;biological_process	PTHR23105_SF29	60S RIBOSOMAL L7A	GO:0042254;GO:0032991;GO:0005575	ribosome biogenesis;protein-containing complex;cellular_component
ENSONIG00000001431	FAT atypical cadherin 4	FAT4	16.555	27.5943	-1.66557	-0.736012	4.39946	15.3616	8.87762e-05	0.0177488	1	protein_coding		100712359	I3IYW2	GO:0007155;GO:0007156;GO:0005886;GO:0005509;GO:0016020;GO:0016021	cell adhesion;homophilic cell adhesion via plasma membrane adhesion molecules;plasma membrane;calcium ion binding;membrane;integral component of membrane	biological_process;cellular_component;molecular_function	PTHR24026_SF41	PROTOCADHERIN FAT 4 PRECURSOR FAT TUMOR SUPPRESSOR HOMOLOG 4 FAT CADHERIN FAT J	GO:0005575;GO:0003674;GO:0043167;GO:0005886;GO:0007155	cellular_component;molecular_function;ion binding;plasma membrane;cell adhesion
ENSONIG00000020185	proto-oncogene c-Fos	fosaa	24.1772	14.0684	1.71506	0.778257	4.31138	15.3505	8.92959e-05	0.0177488	1	protein_coding	ZDB-GENE-131121-552	100711598	I3KWD4	GO:0006357;GO:0003700;GO:0006355;GO:0003677	regulation of transcription by RNA polymerase II;DNA-binding transcription factor activity;regulation of transcription, DNA-templated;DNA binding	biological_process;molecular_function	PTHR23351_SF22	UNCHARACTERIZED	GO:0003674;GO:0003677;GO:0003700	molecular_function;DNA binding;DNA-binding transcription factor activity
ENSONIG00000018356	ribosomal protein S8	rps8a	340.068	504.59	-1.48364	-0.569141	8.85628	15.2966	9.18799e-05	0.0180595	1	protein_coding	ZDB-GENE-030131-8626	100693356	I3KPR7	GO:0005622;GO:0005840;GO:0006412;GO:0003735	intracellular;ribosome;translation;structural constituent of ribosome	cellular_component;biological_process;molecular_function	PTHR10394	40S RIBOSOMAL S8	GO:0003674;GO:0005198;GO:0003735;GO:0009058;GO:0034641;GO:0006412;GO:0032991;GO:0005575;GO:0043226;GO:0005840;GO:0005622	molecular_function;structural molecule activity;structural constituent of ribosome;biosynthetic process;cellular nitrogen compound metabolic process;translation;protein-containing complex;cellular_component;organelle;ribosome;intracellular
ENSONIG00000006321	S100 calcium binding protein A10b	s100a10b	6.27072	12.09	-1.92514	-0.944964	3.39642	15.1773	9.78737e-05	0.0190262	1	protein_coding	ZDB-GENE-040426-1937			GO:0042127;GO:0005509;GO:0048306;GO:0046872	regulation of cell population proliferation;calcium ion binding;calcium-dependent protein binding;metal ion binding	biological_process;molecular_function	PTHR11639_SF58	S100 A12 CALCIUM BINDING IN AMNIOTIC FLUID 1 CAAF1 CALGRANULIN C CAGC EXTRACELLULAR NEWLY IDENTIFIED RAGE BINDING EN RAGE S100 CALCIUM BINDING A12	GO:0003674;GO:0043167	molecular_function;ion binding
ENSONIG00000001111	VIP peptides	VIP	61.5205	40.3235	1.52485	0.608664	5.70421	15.0798	0.000103063	0.0198172	1	protein_coding		100705021	I3IXR7	GO:0005179;GO:0005576;GO:0010469;GO:0048255;GO:0070459	hormone activity;extracellular region;regulation of signaling receptor activity;mRNA stabilization;prolactin secretion	molecular_function;cellular_component;biological_process	PTHR11213	GROWTH HORMONE RELEASING FACTOR GRF GROWTH HORMONE RELEASING HORMONE GHRH	GO:0005575;GO:0005576;GO:0003674;GO:0008150;GO:0006810	cellular_component;extracellular region;molecular_function;biological_process;transport
ENSONIG00000016564	CD40 molecule, TNF receptor superfamily member 5	cd40	63.7193	45.874	1.389	0.474043	5.79034	15.0309	0.000105768	0.0201186	1	protein_coding	ZDB-GENE-090313-95			GO:0005515;GO:0016020;GO:0016021	protein binding;membrane;integral component of membrane	molecular_function;cellular_component	PTHR23097_SF92	RECEPTOR SUPERFAMILY MEMBER 5	GO:0003674;GO:0005575	molecular_function;cellular_component
ENSONIG00000001704	kisspeptin-2	kiss2	1.3734	4.10528	-2.98518	-1.57782	1.55912	14.9951	0.00010779	0.0202852	1	protein_coding		100694550	G3LVK4
ENSONIG00000012741	ubiquitin A-52 residue ribosomal protein fusion product 1	uba52	140.762	256.372	-1.82075	-0.86453	7.80918	14.886	0.000114206	0.0212663	1	protein_coding	ZDB-GENE-051023-7			GO:0005840;GO:0006412;GO:0003735;GO:0005515	ribosome;translation;structural constituent of ribosome;protein binding	cellular_component;biological_process;molecular_function	PTHR10666_SF93	UBIQUITIN 60S RIBOSOMAL L40 PRECURSOR UBIQUITIN A 52 RESIDUE RIBOSOMAL FUSION PRODUCT 1 [CONTAINS UBIQUITIN; 60S RIBOSOMAL L40 ]	GO:0003674;GO:0005198;GO:0003735;GO:0009058;GO:0034641;GO:0006412;GO:0032991;GO:0005575;GO:0043226;GO:0005840	molecular_function;structural molecule activity;structural constituent of ribosome;biosynthetic process;cellular nitrogen compound metabolic process;translation;protein-containing complex;cellular_component;organelle;ribosome
ENSONIG00000009185	calcium channel, voltage-dependent, beta 2b	cacnb2b	27.915	19.4733	1.43565	0.521707	4.55101	14.8089	0.000118972	0.0216241	2	protein_coding	ZDB-GENE-050208-129			GO:0005891;GO:0070588;GO:0005245;GO:0005515	voltage-gated calcium channel complex;calcium ion transmembrane transport;voltage-gated calcium channel activity;protein binding	cellular_component;biological_process;molecular_function	PTHR11824	VOLTAGE DEPENDENT L TYPE CALCIUM CHANNEL SUBUNIT BETA CALCIUM CHANNEL VOLTAGE DEPENDENT SUBUNIT BETA	GO:0003674;GO:0022857;GO:0006810;GO:0055085;GO:0032991;GO:0005575	molecular_function;transmembrane transporter activity;transport;transmembrane transport;protein-containing complex;cellular_component
ENSONIG00000009739	ribosomal protein L27	rpl27	103.456	186.942	-1.80623	-0.852981	7.35439	14.7959	0.000119794	0.0216241	1	protein_coding	ZDB-GENE-030131-4343	100711912	I3JTN7	GO:0005622;GO:0005840;GO:0006412;GO:0003735;GO:0030218	intracellular;ribosome;translation;structural constituent of ribosome;erythrocyte differentiation	cellular_component;biological_process;molecular_function	PTHR10497	60S RIBOSOMAL L27	GO:0003674;GO:0005198;GO:0003735;GO:0009058;GO:0034641;GO:0006412;GO:0032991;GO:0005575;GO:0043226;GO:0005840;GO:0005622;GO:0002376;GO:0042592;GO:0030154	molecular_function;structural molecule activity;structural constituent of ribosome;biosynthetic process;cellular nitrogen compound metabolic process;translation;protein-containing complex;cellular_component;organelle;ribosome;intracellular;immune system process;homeostatic process;cell differentiation
ENSONIG00000012669	cell division cycle 26	cdc26	1.79371	4.27452	-2.36032	-1.23898	1.78902	14.8054	0.000119194	0.0216241	1	protein_coding	ZDB-GENE-040822-18	100699054	I3K4A0	GO:0030071;GO:0005680;GO:0031145;GO:0000278;GO:0007346	regulation of mitotic metaphase/anaphase transition;anaphase-promoting complex;anaphase-promoting complex-dependent catabolic process;mitotic cell cycle;regulation of mitotic cell cycle	biological_process;cellular_component	TF101057	ANAPHASE PROMOTING COMPLEX SUBUNIT CDC26 CELL DIVISION CYCLE 26 HOMOLOG	GO:0032991;GO:0005575;GO:0009056;GO:0000278;GO:0007049	protein-containing complex;cellular_component;catabolic process;mitotic cell cycle;cell cycle
ENSONIG00000012073			5.88493	10.4683	-1.7794	-0.831388	2.8042	14.6981	0.000126172	0.0222569	2	protein_coding							PTHR23250	TECTONIN BETA PROPELLER REPEAT CONTAINING 1
ENSONIG00000017688	G protein-coupled receptor, class C, group 5, member Bb	gprc5bb	805.305	624.608	1.28921	0.366483	9.42309	14.69	0.000126716	0.0222569	2	protein_coding	ZDB-GENE-090313-75			GO:0016021;GO:0007186;GO:0004930;GO:0016020	integral component of membrane;G protein-coupled receptor signaling pathway;G protein-coupled receptor activity;membrane	cellular_component;biological_process;molecular_function	PTHR14511	G COUPLED RECEPTOR FAMILY C GROUP 5 MEMBER RETINOIC ACID INDUCED GENE RAIG	GO:0003674;GO:0007165;GO:0005575	molecular_function;signal transduction;cellular_component
ENSONIG00000018767			8.10832	4.40992	1.82642	0.869018	2.85077	14.6847	0.000127075	0.0222569	1	protein_coding				GO:0003676	nucleic acid binding	molecular_function	PTHR24409_SF11	ZINC FINGER	GO:0003674	molecular_function
ENSONIG00000003384	C-C motif chemokine 2		69.7414	99.9817	-1.4331	-0.519142	6.45993	14.5572	0.000135966	0.0235808	1	protein_coding		100694826	I3J5X2	GO:0008009;GO:0006955;GO:0005576;GO:0060326	chemokine activity;immune response;extracellular region;cell chemotaxis	molecular_function;biological_process;cellular_component			GO:0005575;GO:0005576;GO:0002376;GO:0048870;GO:0040011	cellular_component;extracellular region;immune system process;cell motility;locomotion
ENSONIG00000002300	contactin-3	cntn3a.2	23.1487	37.8715	-1.63386	-0.708285	4.82303	14.4475	0.000144121	0.0247524	1	protein_coding	ZDB-GENE-090312-57	100703160	I3J1Y2	GO:0005515	protein binding	molecular_function	PTHR10489_SF505	CONTACTIN	GO:0003674	molecular_function
ENSONIG00000018790	interferon-induced protein 44		1.5894	0.408395	3.88041	1.95621	0.303559	14.2459	0.000160414	0.0272858	1	protein_coding		100690833	I3KRB2	GO:0005525	GTP binding	molecular_function	PTHR14241_SF1	INTERFERON INDUCED 44	GO:0003674;GO:0043167	molecular_function;ion binding
ENSONIG00000019723	S100 calcium binding protein A10a	s100a10a	11.2769	19.4363	-1.71729	-0.780134	4.15582	14.1923	0.000165047	0.0278065	1	protein_coding	ZDB-GENE-041010-35			GO:0042127;GO:0005509;GO:0048306;GO:0046872;GO:0005634;GO:0005737	regulation of cell population proliferation;calcium ion binding;calcium-dependent protein binding;metal ion binding;nucleus;cytoplasm	biological_process;molecular_function;cellular_component	PTHR11639_SF60	S100 S100 CALCIUM BINDING	GO:0003674;GO:0043167;GO:0005575;GO:0043226;GO:0005634;GO:0005737	molecular_function;ion binding;cellular_component;organelle;nucleus;cytoplasm
ENSONIG00000000615	ribosomal protein L22	rpl22	48.6689	76.0648	-1.56138	-0.642821	6.10659	14.1186	0.000171642	0.0281143	1	protein_coding	ZDB-GENE-051113-276			GO:0005622;GO:0005840;GO:0006412;GO:0003735	intracellular;ribosome;translation;structural constituent of ribosome	cellular_component;biological_process;molecular_function	PTHR10064_SF2	60S RIBOSOMAL L22	GO:0003674;GO:0005198;GO:0003735;GO:0009058;GO:0034641;GO:0006412;GO:0032991;GO:0005575;GO:0043226;GO:0005840;GO:0005622	molecular_function;structural molecule activity;structural constituent of ribosome;biosynthetic process;cellular nitrogen compound metabolic process;translation;protein-containing complex;cellular_component;organelle;ribosome;intracellular
ENSONIG00000005846	serine/threonine-protein phosphatase PP1-beta catalytic subunit	PPP1CB	522.106	399.399	1.30709	0.386364	8.81252	14.1271	0.00017086	0.0281143	1	protein_coding		100692170	I3JES4	GO:0072357;GO:0000164;GO:0004722;GO:0016787;GO:0046872;GO:0004721;GO:0006470	PTW/PP1 phosphatase complex;protein phosphatase type 1 complex;protein serine/threonine phosphatase activity;hydrolase activity;metal ion binding;phosphoprotein phosphatase activity;protein dephosphorylation	cellular_component;molecular_function;biological_process	PTHR11668_SF204	SERINE/THREONINE PHOSPHATASE PP1 BETA CATALYTIC SUBUNIT PP 1B EC_3.1.3.16 EC_3.1.3.- 53	GO:0016791;GO:0032991;GO:0005575;GO:0003674;GO:0043167;GO:0006464	phosphatase activity;protein-containing complex;cellular_component;molecular_function;ion binding;cellular protein modification process	04660+3.1.3.16;04658+3.1.3.16
ENSONIG00000006465	dual specificity protein phosphatase 3		231.354	166.179	1.3917	0.476852	7.59294	14.135	0.00017015	0.0281143	1	protein_coding		102077703	I3JH09	GO:0008138;GO:0016791;GO:0016311;GO:0006470;GO:0004725;GO:0016787;GO:0035335	protein tyrosine/serine/threonine phosphatase activity;phosphatase activity;dephosphorylation;protein dephosphorylation;protein tyrosine phosphatase activity;hydrolase activity;peptidyl-tyrosine dephosphorylation	molecular_function;biological_process	PTHR10159_SF307	DUAL SPECIFICITY PHOSPHATASE 3 EC_3.1.3.16 EC_3.1.3.- 48 VACCINIA H1 RELATED PHOSPHATASE VHR	GO:0016791;GO:0006464	phosphatase activity;cellular protein modification process	04660+3.1.3.16;04658+3.1.3.16
ENSONIG00000012752	ribosomal protein S9	rps9	246.987	368.468	-1.49167	-0.57693	8.36856	14.0908	0.000174192	0.0282702	1	protein_coding	ZDB-GENE-010724-15	100694704	I3K4K6	GO:0015935;GO:0005622;GO:0003723;GO:0006412;GO:0003735;GO:0019843;GO:0005840	small ribosomal subunit;intracellular;RNA binding;translation;structural constituent of ribosome;rRNA binding;ribosome	cellular_component;molecular_function;biological_process	TF621919	40S RIBOSOMAL S9	GO:0003674;GO:0005198;GO:0003735;GO:0009058;GO:0034641;GO:0006412;GO:0003723;GO:0005575;GO:0005622;GO:0032991;GO:0019843;GO:0043226;GO:0005840	molecular_function;structural molecule activity;structural constituent of ribosome;biosynthetic process;cellular nitrogen compound metabolic process;translation;RNA binding;cellular_component;intracellular;protein-containing complex;rRNA binding;organelle;ribosome
ENSONIG00000001263	ribosomal protein S3	rps3	145.11	237.886	-1.63903	-0.712842	7.69197	13.953	0.000187443	0.0292373	1	protein_coding	ZDB-GENE-030131-8494	100696630		GO:0015935;GO:0003723;GO:0005840;GO:0006412;GO:0003735;GO:0030218;GO:0043009	small ribosomal subunit;RNA binding;ribosome;translation;structural constituent of ribosome;erythrocyte differentiation;chordate embryonic development	cellular_component;molecular_function;biological_process	PTHR11760	40S RIBOSOMAL S3	GO:0003674;GO:0005198;GO:0003735;GO:0009058;GO:0034641;GO:0006412;GO:0032991;GO:0005575;GO:0043226;GO:0005840;GO:0003723;GO:0002376;GO:0042592;GO:0030154;GO:0048856;GO:0009790	molecular_function;structural molecule activity;structural constituent of ribosome;biosynthetic process;cellular nitrogen compound metabolic process;translation;protein-containing complex;cellular_component;organelle;ribosome;RNA binding;immune system process;homeostatic process;cell differentiation;anatomical structure development;embryo development
ENSONIG00000005609	ATM interactor	atmin	137.086	102.323	1.34006	0.422293	6.85178	13.992	0.000183593	0.0292373	1	protein_coding	ZDB-GENE-030616-220	100701811	I3JDW9	GO:0003676	nucleic acid binding	molecular_function	PTHR10593_SF10	ATM INTERACTOR ATM/ATR SUBSTRATE CHK2 INTERACTING ZINC FINGER ASCIZ	GO:0003674	molecular_function
ENSONIG00000007988	ribosomal protein L38	rpl38	65.9229	146.784	-2.22562	-1.15421	6.99575	13.9607	0.000186671	0.0292373	1	protein_coding	ZDB-GENE-030131-8752		I3JMG5	GO:0005622;GO:0005840;GO:0006412;GO:0003735;GO:0043009	intracellular;ribosome;translation;structural constituent of ribosome;chordate embryonic development	cellular_component;biological_process;molecular_function	PTHR10965_SF0	60S RIBOSOMAL L38	GO:0003674;GO:0005198;GO:0003735;GO:0009058;GO:0034641;GO:0006412;GO:0032991;GO:0005575;GO:0043226;GO:0005840;GO:0005622;GO:0048856;GO:0009790	molecular_function;structural molecule activity;structural constituent of ribosome;biosynthetic process;cellular nitrogen compound metabolic process;translation;protein-containing complex;cellular_component;organelle;ribosome;intracellular;anatomical structure development;embryo development
ENSONIG00000008360	heme binding protein 1		85.4635	64.1241	1.33471	0.416531	6.25886	13.9432	0.000188414	0.0292373	1	protein_coding		100694852	I3JNR8				PTHR11220_SF2	HEME BINDING 1
ENSONIG00000025968			2.35982	0.208996	10.881	3.44374	0.0645483	13.957	0.00018704	0.0292373	2	lincRNA
ENSONIG00000004628	periostin	postna	10.5472	5.55014	1.89596	0.922925	2.94374	13.9214	0.000190619	0.0293221	2	protein_coding	ZDB-GENE-091113-23	100695303	I3JAD8;I3JAD9	GO:0005515	protein binding	molecular_function	PTHR10900	PRECURSOR	GO:0003674	molecular_function
ENSONIG00000005624	glutamate receptor ionotropic, kainate 1	grik1b	32.8545	21.1024	1.55654	0.638344	4.7429	13.8626	0.000196675	0.0299929	2	protein_coding	ZDB-GENE-070821-1	100705871	I3JDY9;I3JDZ0	GO:0038023;GO:0005216;GO:0004970;GO:0006811;GO:0016020;GO:0016021;GO:0034220;GO:0005886;GO:0030054;GO:0035235;GO:0045202;GO:0045211	signaling receptor activity;ion channel activity;ionotropic glutamate receptor activity;ion transport;membrane;integral component of membrane;ion transmembrane transport;plasma membrane;cell junction;ionotropic glutamate receptor signaling pathway;synapse;postsynaptic membrane	molecular_function;biological_process;cellular_component	PTHR18966_SF36	GLUTAMATE RECEPTOR IONOTROPIC KAINATE 1 PRECURSOR GLUK1 GLUTAMATE RECEPTOR 5 GLUR 5 GLUR5	GO:0005575;GO:0006810;GO:0022857;GO:0003674;GO:0055085;GO:0005886;GO:0007165	cellular_component;transport;transmembrane transporter activity;molecular_function;transmembrane transport;plasma membrane;signal transduction
ENSONIG00000014956	NIPBL, cohesin loading factor		25.5879	36.6417	-1.4328	-0.518836	4.92197	13.8097	0.000202294	0.0305862	2	protein_coding		100691634	I3KCI3;I3KCI4	GO:0010468;GO:0003682;GO:0005634;GO:0007049	regulation of gene expression;chromatin binding;nucleus;cell cycle	biological_process;molecular_function;cellular_component	PTHR21704	NIPPED B SCC2 HOMOLOG	GO:0003674;GO:0005575;GO:0043226;GO:0005634;GO:0007049	molecular_function;cellular_component;organelle;nucleus;cell cycle
ENSONIG00000005229	neuropeptide FF-amide peptide precursor		10.9748	17.6996	-1.60676	-0.684154	3.93089	13.7734	0.000206234	0.0309176	1	protein_coding		100692906	I3JCH9	GO:0005184;GO:0005102;GO:0010469	neuropeptide hormone activity;signaling receptor binding;regulation of signaling receptor activity	molecular_function;biological_process	PTHR15044	PRO FMRFAMIDE RELATED NEUROPEPTIDE FF PRECURSOR FMRFAMIDE RELATED PEPTIDES [CONTAINS NEUROPEPTIDE SF NPSF ; NEUROPEPTIDE FF NPFF ; NEUROPEPTIDE AF NPAF ]	GO:0003674;GO:0008150	molecular_function;biological_process
ENSONIG00000012455			2.8826	5.27646	-1.82745	-0.869834	2.15782	13.7314	0.0002109	0.0313515	1	protein_coding							PTHR15907_SF34	UNCHARACTERIZED
ENSONIG00000022297			14.1646	34.9029	-2.46376	-1.30086	4.5034	13.6134	0.000224581	0.033107	1	lincRNA
ENSONIG00000000786	synapse differentiation-inducing gene protein 1-like	syndig1l	265.031	209.443	1.26503	0.339174	7.88467	13.5761	0.00022908	0.0332166	1	protein_coding	ZDB-GENE-041001-116	100700169	I3IWK6	GO:0016021;GO:0016020	integral component of membrane;membrane	cellular_component	PTHR14768	SYNAPSE DIFFERENTIATION INDUCING GENE 1 DISPANIN SUBFAMILY C MEMBER TRANSMEMBRANE	GO:0005575	cellular_component
ENSONIG00000017968	ribosomal protein S20	RPS20	130.418	221.209	-1.69562	-0.761811	7.63837	13.5815	0.000228425	0.0332166	1	protein_coding		100696588	I3KNE6	GO:0015935;GO:0005622;GO:0003723;GO:0005840;GO:0006412;GO:0003735	small ribosomal subunit;intracellular;RNA binding;ribosome;translation;structural constituent of ribosome	cellular_component;molecular_function;biological_process	PTHR11700_SF8	40S RIBOSOMAL S20	GO:0003674;GO:0005198;GO:0003735;GO:0009058;GO:0034641;GO:0006412;GO:0032991;GO:0005575;GO:0043226;GO:0005840;GO:0003723;GO:0005622	molecular_function;structural molecule activity;structural constituent of ribosome;biosynthetic process;cellular nitrogen compound metabolic process;translation;protein-containing complex;cellular_component;organelle;ribosome;RNA binding;intracellular
ENSONIG00000010985	cytochrome b5 reductase 2	cyb5r2	11.1834	18.8019	-1.6793	-0.747856	3.89049	13.4431	0.000245915	0.0353678	1	protein_coding	ZDB-GENE-060825-83			GO:0055114;GO:0016491;GO:0016020;GO:0016021;GO:0004128;GO:0001878	oxidation-reduction process;oxidoreductase activity;membrane;integral component of membrane;cytochrome-b5 reductase activity, acting on NAD(P)H;response to yeast	biological_process;molecular_function;cellular_component	PTHR19370_SF80	NADH CYTOCHROME B5 REDUCTASE 3 B5R CYTOCHROME B5 REDUCTASE EC_1.6.2.2 DIAPHORASE 1 [CONTAINS NADH CYTOCHROME B5 REDUCTASE 3 MEMBRANE BOUND FORM; NADH CYTOCHROME B5 REDUCTASE 3 SOLUBLE FORM]	GO:0016491;GO:0005575	oxidoreductase activity;cellular_component
ENSONIG00000009861	mutS homolog 6	msh6	20.0416	27.528	-1.37276	-0.457075	4.59185	13.3937	0.000252471	0.0357539	1	protein_coding	ZDB-GENE-020905-3	100710916	I3JU46	GO:0005524;GO:0030983;GO:0006298;GO:0003677;GO:0000166;GO:0006281;GO:0006974;GO:0003690;GO:0032137;GO:0043570	ATP binding;mismatched DNA binding;mismatch repair;DNA binding;nucleotide binding;DNA repair;cellular response to DNA damage stimulus;double-stranded DNA binding;guanine/thymine mispair binding;maintenance of DNA repeat elements	molecular_function;biological_process	PTHR11361_SF31	DNA MISMATCH REPAIR MSH6	GO:0003674;GO:0043167;GO:0003677;GO:0006259;GO:0006950;GO:0034641;GO:0051276	molecular_function;ion binding;DNA binding;DNA metabolic process;response to stress;cellular nitrogen compound metabolic process;chromosome organization
ENSONIG00000014384	ribosomal protein L6	rpl6	339.337	494.525	-1.45713	-0.54313	8.8196	13.3924	0.000252642	0.0357539	1	protein_coding	ZDB-GENE-030131-8671	100699139	I3KAE2	GO:0005622;GO:0005840;GO:0006412;GO:0003735;GO:0031016;GO:0043009	intracellular;ribosome;translation;structural constituent of ribosome;pancreas development;chordate embryonic development	cellular_component;biological_process;molecular_function	PTHR10715_SF0	60S RIBOSOMAL L6	GO:0003674;GO:0005198;GO:0003735;GO:0009058;GO:0034641;GO:0006412;GO:0032991;GO:0005575;GO:0043226;GO:0005840;GO:0005622;GO:0048856;GO:0009790	molecular_function;structural molecule activity;structural constituent of ribosome;biosynthetic process;cellular nitrogen compound metabolic process;translation;protein-containing complex;cellular_component;organelle;ribosome;intracellular;anatomical structure development;embryo development
ENSONIG00000001481			5.36665	9.16865	-1.69788	-0.763736	2.8653	13.3456	0.000259031	0.0363672	2	protein_coding				GO:0004864;GO:0007165;GO:0032515	protein phosphatase inhibitor activity;signal transduction;negative regulation of phosphoprotein phosphatase activity	molecular_function;biological_process	PTHR15417_SF4	PHOSPHATASE 1 REGULATORY SUBUNIT 1C	GO:0007165;GO:0003674;GO:0008150;GO:0030234	signal transduction;molecular_function;biological_process;enzyme regulator activity
ENSONIG00000001755	cornichon family AMPA receptor auxiliary protein 2	cnih2	131.251	96.7605	1.35659	0.439987	6.76938	13.2987	0.000265591	0.0369945	1	protein_coding	ZDB-GENE-050320-96	100706298	I3J009	GO:0016192;GO:0016020;GO:0016021	vesicle-mediated transport;membrane;integral component of membrane	biological_process;cellular_component	PTHR12290	CORNICHON HOMOLOG CNIH CORNICHON FAMILY AMPA RECEPTOR AUXILIARY	GO:0006810;GO:0016192;GO:0005575	transport;vesicle-mediated transport;cellular_component
ENSONIG00000007608	G protein subunit gamma 10	gng10	1.9512	3.96034	-2.02439	-1.01749	1.80901	13.2724	0.000269344	0.0372242	1	protein_coding	ZDB-GENE-091020-1	100698239	I3JL46	GO:0005834;GO:0003924;GO:0007186;GO:0016020;GO:0007165;GO:0005886	heterotrimeric G-protein complex;GTPase activity;G protein-coupled receptor signaling pathway;membrane;signal transduction;plasma membrane	cellular_component;molecular_function;biological_process	PTHR13809	GUANINE NUCLEOTIDE BINDING SUBUNIT GAMMA	GO:0007165;GO:0003924;GO:0032991;GO:0005575;GO:0005886	signal transduction;GTPase activity;protein-containing complex;cellular_component;plasma membrane
ENSONIG00000022344			2.41524	0.833962	2.87375	1.52294	0.733342	13.2543	0.00027195	0.037293	1	lincRNA
ENSONIG00000004302	inositol hexakisphosphate kinase 1	ip6k1	6.3727	10.8182	-1.68319	-0.751197	3.10901	13.1782	0.000283232	0.0375976	1	protein_coding	ZDB-GENE-110317-2			GO:0032958;GO:0016301;GO:0016740;GO:0016310	inositol phosphate biosynthetic process;kinase activity;transferase activity;phosphorylation	biological_process;molecular_function	PTHR12400_SF50	INOSITOL HEXAKISPHOSPHATE KINASE 1 INSP6 KINASE 1 EC_2.7.4.21 INOSITOL HEXAPHOSPHATE KINASE 1	GO:0016301;GO:0009058;GO:0044281	kinase activity;biosynthetic process;small molecule metabolic process
ENSONIG00000008577	neuronal pentraxin receptor a	nptxra	445.626	326.846	1.36327	0.447072	8.55281	13.1623	0.000285632	0.0375976	1	protein_coding	ZDB-GENE-050208-280			GO:0016020;GO:0016021	membrane;integral component of membrane	cellular_component	PTHR19277	PRECURSOR	GO:0005575	cellular_component
ENSONIG00000008686	neuronal cell adhesion molecule	NRCAM (1 of many)	104.383	140.85	-1.34877	-0.43164	6.89793	13.1783	0.000283214	0.0375976	2	protein_coding			I3JPX3;I3JPX2	GO:0005515;GO:0016020;GO:0016021	protein binding;membrane;integral component of membrane	molecular_function;cellular_component	PTHR10489_SF554	NEURONAL CELL ADHESION MOLECULE PRECURSOR NR CAM NEURONAL SURFACE BRAVO NGCAM RELATED CELL ADHESION MOLECULE NG CAM RELATED	GO:0003674;GO:0005575	molecular_function;cellular_component
ENSONIG00000008992	ribosomal protein L9	rpl9	117.481	203.15	-1.72881	-0.789783	7.46552	13.1945	0.00028077	0.0375976	1	protein_coding	ZDB-GENE-030131-8646	100703191	I3JR13	GO:0005622;GO:0005840;GO:0006412;GO:0003735;GO:0019843	intracellular;ribosome;translation;structural constituent of ribosome;rRNA binding	cellular_component;biological_process;molecular_function	PTHR11655	60S RIBOSOMAL L9	GO:0003674;GO:0005198;GO:0003735;GO:0009058;GO:0034641;GO:0006412;GO:0032991;GO:0005575;GO:0043226;GO:0005840;GO:0005622;GO:0003723;GO:0019843	molecular_function;structural molecule activity;structural constituent of ribosome;biosynthetic process;cellular nitrogen compound metabolic process;translation;protein-containing complex;cellular_component;organelle;ribosome;intracellular;RNA binding;rRNA binding
ENSONIG00000009211	vigilin	hdlbpb	27.9469	37.3941	-1.33716	-0.419171	4.96855	13.1406	0.00028897	0.0375976	2	protein_coding	ZDB-GENE-030131-6822	100709441	I3JRT9;I3JRU0	GO:0003723;GO:0003676	RNA binding;nucleic acid binding	molecular_function	PTHR10627_SF30	UNKNOWN	GO:0003674;GO:0003723	molecular_function;RNA binding
ENSONIG00000011864	ribosomal protein L10a	rpl10a	242.233	343.908	-1.41957	-0.505452	8.3175	13.1427	0.000288641	0.0375976	1	protein_coding	ZDB-GENE-030131-2025	100702190	I3K1E0	GO:0003723;GO:0006412;GO:0003735;GO:0015934;GO:0005840	RNA binding;translation;structural constituent of ribosome;large ribosomal subunit;ribosome	molecular_function;biological_process;cellular_component	PTHR23105_SF36	60S RIBOSOMAL L10A	GO:0003674;GO:0005198;GO:0003735;GO:0009058;GO:0034641;GO:0006412;GO:0003723;GO:0032991;GO:0005575;GO:0043226;GO:0005840	molecular_function;structural molecule activity;structural constituent of ribosome;biosynthetic process;cellular nitrogen compound metabolic process;translation;RNA binding;protein-containing complex;cellular_component;organelle;ribosome
ENSONIG00000015706	cytochrome c oxidase copper chaperone	cox17	15.1931	24.7463	-1.62243	-0.698155	4.47837	13.1356	0.000289734	0.0375976	1	protein_coding	ZDB-GENE-040912-91	100689881	I3KF71	GO:0005507;GO:0005758;GO:0006825;GO:0016531;GO:0046688	copper ion binding;mitochondrial intermembrane space;copper ion transport;copper chaperone activity;response to copper ion	molecular_function;cellular_component;biological_process	TF628970	UNCHARACTERIZED	GO:0005575;GO:0003674;GO:0043167;GO:0006810	cellular_component;molecular_function;ion binding;transport
ENSONIG00000019363	HIRA interacting protein 3	hirip3	0.822614	2.56513	-3.11283	-1.63823	0.754496	13.1127	0.0002933	0.0375976	3	protein_coding	ZDB-GENE-030131-5753	100702213	I3KTC5;I3KTC7;I3KTC6	GO:0007420	brain development	biological_process	PTHR15410	HIRA INTERACTING 3	GO:0048856	anatomical structure development
ENSONIG00000019693	PHD finger protein 5A	phf5a	10.0779	18.3444	-1.8118	-0.857427	4.01149	13.1189	0.000292327	0.0375976	1	protein_coding	ZDB-GENE-021219-3	100699529	I3KUJ0				PTHR13120	PHD FINGER DOMAIN CONTAINING 5A PHD FINGER DOMAIN 5A SPLICING FACTOR 3B ASSOCIATED 14 KDA S B
ENSONIG00000000770	ATR serine/threonine kinase	atr	4.6569	7.85747	-1.67249	-0.741995	2.57742	13.0871	0.000297336	0.0378408	1	protein_coding	ZDB-GENE-070912-458			GO:0016301;GO:0004674;GO:0005515;GO:0016740;GO:0000166;GO:0005524;GO:0016310;GO:0003140;GO:0006468;GO:0008630;GO:0035469;GO:0060271;GO:1901207	kinase activity;protein serine/threonine kinase activity;protein binding;transferase activity;nucleotide binding;ATP binding;phosphorylation;determination of left/right asymmetry in lateral mesoderm;protein phosphorylation;intrinsic apoptotic signaling pathway in response to DNA damage;determination of pancreatic left/right asymmetry;cilium assembly;regulation of heart looping	molecular_function;biological_process	PTHR11139_SF64	SERINE/THREONINE KINASE ATR EC_2.7.11.1 ATAXIA TELANGIECTASIA AND RAD3 RELATED	GO:0003674;GO:0016301;GO:0043167;GO:0048856;GO:0006464;GO:0006950;GO:0007165;GO:0022607	molecular_function;kinase activity;ion binding;anatomical structure development;cellular protein modification process;response to stress;signal transduction;cellular component assembly	04151+2.7.11.1;04150+2.7.11.1;05165+2.7.11.1;04926+2.7.11.1;04714+2.7.11.1;05170+2.7.11.1;05163+2.7.11.1
ENSONIG00000007120	2'-deoxynucleoside 5'-phosphate N-hydrolase 1	dnph1	8.34322	12.7889	-1.53084	-0.614327	3.45945	12.9462	0.00032057	0.0403344	1	protein_coding	ZDB-GENE-081107-5	100710623	I3JJD8	GO:0070694;GO:0009159;GO:0005634;GO:0005737;GO:0016787;GO:0016798;GO:0008152;GO:0009117;GO:0016799;GO:0009116	deoxyribonucleoside 5'-monophosphate N-glycosidase activity;deoxyribonucleoside monophosphate catabolic process;nucleus;cytoplasm;hydrolase activity;hydrolase activity, acting on glycosyl bonds;metabolic process;nucleotide metabolic process;hydrolase activity, hydrolyzing N-glycosyl compounds;nucleoside metabolic process	molecular_function;biological_process;cellular_component	PTHR15364	2' DEOXYNUCLEOSIDE 5' PHOSPHATE N HYDROLASE 1 EC_3.2.2.-	GO:0016798;GO:0009058;GO:0044281;GO:0009056;GO:0034641;GO:0034655;GO:0005575;GO:0043226;GO:0005634;GO:0005737;GO:0008150	hydrolase activity, acting on glycosyl bonds;biosynthetic process;small molecule metabolic process;catabolic process;cellular nitrogen compound metabolic process;nucleobase-containing compound catabolic process;cellular_component;organelle;nucleus;cytoplasm;biological_process
ENSONIG00000007506	profilin-1	pfn1	27.9151	38.4861	-1.37715	-0.461686	5.1562	12.9408	0.00032149	0.0403344	1	protein_coding	ZDB-GENE-031002-33	100700117	I3JKS3	GO:0030833;GO:0030036;GO:0003779;GO:0055113;GO:0060027	regulation of actin filament polymerization;actin cytoskeleton organization;actin binding;epiboly involved in gastrulation with mouth forming second;convergent extension involved in gastrulation	biological_process;molecular_function	PTHR13936	PROFILIN PROFILIN	GO:0003674;GO:0008092;GO:0007010	molecular_function;cytoskeletal protein binding;cytoskeleton organization
ENSONIG00000011721	transmembrane protein 184C	TMEM184C (1 of many)	60.7016	47.3194	1.28366	0.360264	5.78402	12.9193	0.000325205	0.0405132	1	protein_coding			I3K0W6	GO:0016020;GO:0016021	membrane;integral component of membrane	cellular_component	PTHR23423_SF10	TRANSMEMBRANE 184C TRANSMEMBRANE 34	GO:0005575	cellular_component
ENSONIG00000022415			1.55269	4.01923	-2.56554	-1.35926	1.3654	12.8926	0.000329882	0.0405251	1	lincRNA
ENSONIG00000023000			2.76266	5.74619	-2.05068	-1.0361	1.96191	12.9015	0.000328316	0.0405251	2	lincRNA
ENSONIG00000002986	60S acidic ribosomal protein P2	rplp2l	144.692	240.026	-1.65831	-0.729714	7.74558	12.8774	0.000332582	0.0405751	1	protein_coding	ZDB-GENE-070327-2	100691806	I3J4E9	GO:0006414;GO:0005622;GO:0005840;GO:0006412;GO:0003735;GO:0043009	translational elongation;intracellular;ribosome;translation;structural constituent of ribosome;chordate embryonic development	biological_process;cellular_component;molecular_function	PTHR21141_SF5	60S ACIDIC RIBOSOMAL P2	GO:0003674;GO:0005198;GO:0003735;GO:0009058;GO:0034641;GO:0006412;GO:0032991;GO:0005575;GO:0043226;GO:0005840;GO:0005622;GO:0048856;GO:0009790	molecular_function;structural molecule activity;structural constituent of ribosome;biosynthetic process;cellular nitrogen compound metabolic process;translation;protein-containing complex;cellular_component;organelle;ribosome;intracellular;anatomical structure development;embryo development
ENSONIG00000003284	kelch domain-containing protein 8A	klhdc8a	99.6248	70.0235	1.42215	0.508076	6.40764	12.8614	0.000335424	0.0406415	1	protein_coding	ZDB-GENE-120810-3	100707086		GO:0005515	protein binding	molecular_function	PTHR24412_SF145	KELCH DOMAIN CONTAINING 8A	GO:0003674	molecular_function
ENSONIG00000022734			0.531307	1.7845	-3.307	-1.72552	0.201692	12.8374	0.000339755	0.0408862	1	lincRNA
ENSONIG00000000829	ribosomal protein S29	rps29	62.496	139.962	-2.23869	-1.16265	6.91426	12.7993	0.00034675	0.0408934	1	protein_coding	ZDB-GENE-040622-5	100703241	I3IWR4	GO:0008270;GO:0005622;GO:0005840;GO:0006412;GO:0003735;GO:0001525;GO:0001570;GO:0030218;GO:0043009;GO:0048821;GO:0051726;GO:0060218;GO:0072332	zinc ion binding;intracellular;ribosome;translation;structural constituent of ribosome;angiogenesis;vasculogenesis;erythrocyte differentiation;chordate embryonic development;erythrocyte development;regulation of cell cycle;hematopoietic stem cell differentiation;intrinsic apoptotic signaling pathway by p53 class mediator	molecular_function;cellular_component;biological_process	PTHR12010_SF4	RIBOSOMAL S29	GO:0003674;GO:0005198;GO:0003735;GO:0009058;GO:0034641;GO:0006412;GO:0032991;GO:0005575;GO:0043226;GO:0005840;GO:0005622;GO:0043167;GO:0048646;GO:0030154;GO:0002376;GO:0042592;GO:0048856;GO:0009790;GO:0007165	molecular_function;structural molecule activity;structural constituent of ribosome;biosynthetic process;cellular nitrogen compound metabolic process;translation;protein-containing complex;cellular_component;organelle;ribosome;intracellular;ion binding;anatomical structure formation involved in morphogenesis;cell differentiation;immune system process;homeostatic process;anatomical structure develo…
ENSONIG00000015837	K(lysine) acetyltransferase 6A	kat6a	47.1388	67.2389	-1.42434	-0.510296	5.75316	12.8101	0.00034475	0.0408934	1	protein_coding	ZDB-GENE-021022-3			GO:0070776;GO:0003713;GO:0016573;GO:0004402;GO:0006334;GO:0000786;GO:0005634;GO:0006355;GO:0003677;GO:0048513;GO:0043966;GO:0046872;GO:1903508;GO:0001502;GO:0009880;GO:0009952;GO:0010172;GO:0014036;GO:0048703;GO:0048706;GO:0051216;GO:0000790	MOZ/MORF histone acetyltransferase complex;transcription coactivator activity;histone acetylation;histone acetyltransferase activity;nucleosome assembly;nucleosome;nucleus;regulation of transcription, DNA-templated;DNA binding;animal organ development;histone H3 acetylation;metal ion binding;positive regulation of nucleic acid-templated transcription;cartilage condensation;embryonic pattern speci…	cellular_component;molecular_function;biological_process	PTHR10615_SF26	HISTONE ACETYLTRANSFERASE KAT6A EC_2.3.1.48 MOZ YBF2/SAS3 SAS2 AND TIP60 3 MYST 3 MONOCYTIC LEUKEMIA ZINC FINGER HOMOLOG MONOCYTIC LEUKEMIA ZINC FINGER	GO:0003674;GO:0003677;GO:0005575;GO:0043226;GO:0005634;GO:0032991;GO:0022607;GO:0065003;GO:0016746;GO:0006464;GO:0048856;GO:0043167;GO:0009790	molecular_function;DNA binding;cellular_component;organelle;nucleus;protein-containing complex;cellular component assembly;protein-containing complex assembly;transferase activity, transferring acyl groups;cellular protein modification process;anatomical structure development;ion binding;embryo development
ENSONIG00000024474			17.9904	12.6465	1.42183	0.507754	3.92208	12.8145	0.000343935	0.0408934	1	lincRNA
ENSONIG00000007788	trio Rho guanine nucleotide exchange factor	TRIO	299.861	409.132	-1.3639	-0.447736	8.42052	12.7217	0.000361429	0.0409851	1	protein_coding		100707006	I3JLR7	GO:0005085;GO:0035023;GO:0005089;GO:0004674;GO:0006468;GO:0004672;GO:0005524;GO:0005515;GO:0016301;GO:0016310	guanyl-nucleotide exchange factor activity;regulation of Rho protein signal transduction;Rho guanyl-nucleotide exchange factor activity;protein serine/threonine kinase activity;protein phosphorylation;protein kinase activity;ATP binding;protein binding;kinase activity;phosphorylation	molecular_function;biological_process	PTHR22826_SF104	TRIPLE FUNCTIONAL DOMAIN EC_2.7.11.1	GO:0003674;GO:0043167;GO:0016301;GO:0006464	molecular_function;ion binding;kinase activity;cellular protein modification process	04151+2.7.11.1;04150+2.7.11.1;05165+2.7.11.1;04926+2.7.11.1;04714+2.7.11.1;05170+2.7.11.1;05163+2.7.11.1
ENSONIG00000009369			24.9924	34.6204	-1.37952	-0.464163	4.83662	12.7268	0.000360449	0.0409851	1	protein_coding			I3JSC7	GO:0016021;GO:0016020	integral component of membrane;membrane	cellular_component	PTHR14948_SF20	PROLINE RICH TRANSMEMBRANE 2 DISPANIN SUBFAMILY B MEMBER 3 DSPB3	GO:0005575	cellular_component
ENSONIG00000017630	eukaryotic translation elongation factor 1 beta 2	eef1b2	70.4994	122.471	-1.73694	-0.796552	6.7114	12.7693	0.000352348	0.0409851	1	protein_coding	ZDB-GENE-030131-7310			GO:0006414;GO:0003746;GO:0005853;GO:0006412	translational elongation;translation elongation factor activity;eukaryotic translation elongation factor 1 complex;translation	biological_process;molecular_function;cellular_component	PTHR11595	ELONGATION FACTOR 1 EF 1	GO:0003674;GO:0003723;GO:0009058;GO:0008135;GO:0032991;GO:0005575;GO:0034641;GO:0006412	molecular_function;RNA binding;biosynthetic process;translation factor activity, RNA binding;protein-containing complex;cellular_component;cellular nitrogen compound metabolic process;translation
ENSONIG00000017661	60S ribosomal protein L22-like 1	rpl22l1	15.8768	25.7919	-1.62237	-0.698106	4.56597	12.7488	0.000356237	0.0409851	1	protein_coding	ZDB-GENE-060804-3	100699889	I3KMC4	GO:0005622;GO:0005840;GO:0006412;GO:0003735;GO:0003723;GO:0060216	intracellular;ribosome;translation;structural constituent of ribosome;RNA binding;definitive hemopoiesis	cellular_component;biological_process;molecular_function	PTHR10064_SF1	60S RIBOSOMAL L22 1	GO:0003674;GO:0005198;GO:0003735;GO:0009058;GO:0034641;GO:0006412;GO:0032991;GO:0005575;GO:0043226;GO:0005840;GO:0005622;GO:0003723;GO:0048856	molecular_function;structural molecule activity;structural constituent of ribosome;biosynthetic process;cellular nitrogen compound metabolic process;translation;protein-containing complex;cellular_component;organelle;ribosome;intracellular;RNA binding;anatomical structure development
ENSONIG00000018192	interferon-induced protein with tetratricopeptide repeats 1		5.34769	0.946303	5.64106	2.49597	1.72237	12.7403	0.000357864	0.0409851	1	protein_coding		102079419		GO:0005515	protein binding	molecular_function	PTHR10271	INTERFERON INDUCED WITH TETRATRICOPEPTIDE REPEATS IFIT INTERFERON INDUCED KDA IFI	GO:0003674	molecular_function
ENSONIG00000019243	ribosomal protein L5	rpl5b	250.51	383.605	-1.53122	-0.614684	8.399	12.7825	0.000349874	0.0409851	1	protein_coding	ZDB-GENE-040625-93	100708520	I3KSX1	GO:0005622;GO:0005840;GO:0006412;GO:0003735;GO:0008097	intracellular;ribosome;translation;structural constituent of ribosome;5S rRNA binding	cellular_component;biological_process;molecular_function	PTHR23410	60S RIBOSOMAL L5	GO:0003674;GO:0005198;GO:0003735;GO:0009058;GO:0034641;GO:0006412;GO:0032991;GO:0005575;GO:0043226;GO:0005840;GO:0005622;GO:0003723;GO:0019843	molecular_function;structural molecule activity;structural constituent of ribosome;biosynthetic process;cellular nitrogen compound metabolic process;translation;protein-containing complex;cellular_component;organelle;ribosome;intracellular;RNA binding;rRNA binding
ENSONIG00000003849	lysosomal alpha-glucosidase	si:ch73-12o23.1	102.15	81.6276	1.25193	0.324155	6.49337	12.6071	0.000384283	0.0431909	1	protein_coding	ZDB-GENE-130530-749	100695517	I3J7K9	GO:0030246;GO:0004553;GO:0005975;GO:0003824;GO:0016020;GO:0016021;GO:0016787;GO:0016798;GO:0008152	carbohydrate binding;hydrolase activity, hydrolyzing O-glycosyl compounds;carbohydrate metabolic process;catalytic activity;membrane;integral component of membrane;hydrolase activity;hydrolase activity, acting on glycosyl bonds;metabolic process	molecular_function;biological_process;cellular_component	PTHR22762_SF57	LYSOSOMAL ALPHA GLUCOSIDASE	GO:0003674;GO:0005975;GO:0016798;GO:0005575;GO:0008150	molecular_function;carbohydrate metabolic process;hydrolase activity, acting on glycosyl bonds;cellular_component;biological_process
ENSONIG00000015660	ADP-ribosylation factor GTPase activating protein 2	arfgap2	57.4301	43.2732	1.32849	0.409784	5.67937	12.5999	0.000385763	0.0431909	1	protein_coding	ZDB-GENE-051120-177			GO:0005096;GO:0046872;GO:0043547	GTPase activator activity;metal ion binding;positive regulation of GTPase activity	molecular_function;biological_process	PTHR23180_SF194	ADP RIBOSYLATION FACTOR GTPASE ACTIVATING 2 ARF GAP 2 GTPASE ACTIVATING ZNF289 ZINC FINGER 289	GO:0003674;GO:0030234;GO:0043167	molecular_function;enzyme regulator activity;ion binding
ENSONIG00000009122	keratin, type I cytoskeletal 18	krt18a.1	140.514	176.934	-1.25917	-0.332474	7.31146	12.5687	0.000392265	0.0433698	1	protein_coding	ZDB-GENE-030411-6	100692632	I3JRH6	GO:0005882;GO:0005198	intermediate filament;structural molecule activity	cellular_component;molecular_function	PTHR23239_SF124	KERATIN TYPE I CYTOSKELETAL 18 CYTOKERATIN 18 CK 18 KERATIN 18 K18	GO:0003674;GO:0005198;GO:0005575	molecular_function;structural molecule activity;cellular_component
ENSONIG00000009780	ER membrane protein complex subunit 10	emc10	63.0477	81.4837	-1.29155	-0.3691	6.24047	12.5698	0.00039203	0.0433698	1	protein_coding	ZDB-GENE-030131-9045	100690636	I3JTU3				TF650600	ER MEMBRANE COMPLEX SUBUNIT 10 PRECURSOR
ENSONIG00000007346	dehydrogenase/reductase X-linked		34.5282	23.5689	1.46245	0.548391	4.92481	12.5478	0.000396683	0.0435859	2	protein_coding		100705640	I3JK77;I3JK76				PTHR24320_SF50	PROBABLE OXIDOREDUCTASE ENV9 EC_1.1.1.- LATE ENDOSOME AND VACUOLE INTERFACE 9
ENSONIG00000011852	ribosomal protein S4 X-linked	rps4x	201.47	328.252	-1.62907	-0.70405	8.15306	12.5198	0.000402666	0.0439701	1	protein_coding	ZDB-GENE-040927-19	100709648	I3K1C5	GO:0005622;GO:0003723;GO:0005840;GO:0006412;GO:0003735;GO:0019843;GO:0007420;GO:0043009	intracellular;RNA binding;ribosome;translation;structural constituent of ribosome;rRNA binding;brain development;chordate embryonic development	cellular_component;molecular_function;biological_process	PTHR11581	40S RIBOSOMAL S4	GO:0003674;GO:0005198;GO:0003735;GO:0009058;GO:0034641;GO:0006412;GO:0032991;GO:0005575;GO:0043226;GO:0005840;GO:0003723;GO:0005622;GO:0019843;GO:0048856;GO:0009790	molecular_function;structural molecule activity;structural constituent of ribosome;biosynthetic process;cellular nitrogen compound metabolic process;translation;protein-containing complex;cellular_component;organelle;ribosome;RNA binding;intracellular;rRNA binding;anatomical structure development;embryo development
ENSONIG00000007641	kelch like family member 8	klhl8	70.4867	54.2179	1.29959	0.378061	5.98256	12.4939	0.000408289	0.0443106	1	protein_coding	ZDB-GENE-070209-226	100700118	I3JL85	GO:0031463;GO:0016567;GO:0005515	Cul3-RING ubiquitin ligase complex;protein ubiquitination;protein binding	cellular_component;biological_process;molecular_function	PTHR24412_SF138	KELCH 8	GO:0003674;GO:0006464;GO:0032991;GO:0005575	molecular_function;cellular protein modification process;protein-containing complex;cellular_component
ENSONIG00000012756	leukocyte receptor cluster (LRC) member 8	leng8	73.2825	99.6408	-1.35925	-0.44281	6.33629	12.4753	0.000412369	0.0444805	3	protein_coding	ZDB-GENE-070410-6						PTHR12436_SF4	LEUKOCYTE RECEPTOR CLUSTER MEMBER 8
ENSONIG00000025397			14.1635	21.9681	-1.543	-0.625742	4.18252	12.4405	0.000420123	0.0450423	1	lincRNA
ENSONIG00000005058	family with sequence similarity 168 member A	fam168a	55.8633	73.8327	-1.32035	-0.400918	6.07334	12.383	0.00043325	0.0461698	2	protein_coding	ZDB-GENE-060825-128	100705307	I3JBX1;I3JBX2				PTHR31844	MYELIN ASSOCIATED NEURITE OUTGROWTH INHIBITOR MANI
ENSONIG00000002309	fatty acid-binding protein, heart	fabp3	154.628	204.367	-1.32128	-0.401939	7.57961	12.3436	0.000442511	0.0461885	1	protein_coding	ZDB-GENE-020318-2	100698043	I3J1Z5	GO:0008289;GO:0001947;GO:0007507;GO:0043009	lipid binding;heart looping;heart development;chordate embryonic development	molecular_function;biological_process	PTHR11955_SF61	FATTY ACID BINDING PROTEIN HEART FATTY ACID BINDING 3 HEART TYPE FATTY ACID BINDING H FABP	GO:0003674;GO:0008289;GO:0048856;GO:0009790	molecular_function;lipid binding;anatomical structure development;embryo development
ENSONIG00000004350	tumor protein, translationally-controlled 1	tpt1	354.196	599.958	-1.69378	-0.760245	9.00062	12.353	0.000440271	0.0461885	1	protein_coding	ZDB-GENE-990603-10	100699383	I3J9E2				PTHR11991	TRANSLATIONALLY CONTROLLED TUMOR HOMOLOG TCTP
ENSONIG00000007904	arginine and glutamate rich 1	arglu1a	56.0971	75.6071	-1.34574	-0.4284	6.01042	12.37	0.000436282	0.0461885	1	protein_coding	ZDB-GENE-040426-2914	100708724	I3JM68				PTHR31711_SF1	ARGININE AND GLUTAMATE RICH 1
ENSONIG00000009081	defender against cell death 1	dad1	45.8255	67.1342	-1.46262	-0.548558	5.95728	12.3269	0.00044648	0.0461885	1	protein_coding	ZDB-GENE-060503-233	100712496	I3JRC5	GO:0016021;GO:0004579;GO:0008250;GO:0016020;GO:0006486;GO:0005783;GO:0005789	integral component of membrane;dolichyl-diphosphooligosaccharide-protein glycotransferase activity;oligosaccharyltransferase complex;membrane;protein glycosylation;endoplasmic reticulum;endoplasmic reticulum membrane	cellular_component;molecular_function;biological_process	PTHR10705	DOLICHYL DIPHOSPHOOLIGOSACCHARIDE GLYCOSYLTRANSFERASE SUBUNIT DAD1 OLIGOSACCHARYL TRANSFERASE SUBUNIT DAD1 DEFENDER AGAINST CELL DEATH 1 DAD 1	GO:0005575;GO:0016757;GO:0032991;GO:0006464;GO:0043226;GO:0005783	cellular_component;transferase activity, transferring glycosyl groups;protein-containing complex;cellular protein modification process;organelle;endoplasmic reticulum
ENSONIG00000019041	protein kinase C delta	prkcda	151.889	119.542	1.27037	0.345245	7.05318	12.3284	0.000446126	0.0461885	1	protein_coding	ZDB-GENE-030131-6503	100698031	I3KS76	GO:0004697;GO:0035556;GO:0004674;GO:0006468;GO:0004672;GO:0005524;GO:0005634;GO:0016740;GO:0000166;GO:0005737;GO:0016301;GO:0016310;GO:0006915;GO:0046872;GO:0007049;GO:0048471	protein kinase C activity;intracellular signal transduction;protein serine/threonine kinase activity;protein phosphorylation;protein kinase activity;ATP binding;nucleus;transferase activity;nucleotide binding;cytoplasm;kinase activity;phosphorylation;apoptotic process;metal ion binding;cell cycle;perinuclear region of cytoplasm	molecular_function;biological_process;cellular_component	PTHR24352_SF32	KINASE C DELTA TYPE EC_2.7.11.13 TYROSINE KINASE PRKCD EC_2.7.10.- 2 NPKC DELTA [CONTAINS KINASE C DELTA TYPE REGULATORY SUBUNIT; KINASE C DELTA TYPE CATALYTIC SUBUNIT SPHINGOSINE DEPENDENT KINASE 1 SDK1 ]	GO:0003674;GO:0043167;GO:0016301;GO:0006464;GO:0007165;GO:0005575;GO:0043226;GO:0005634;GO:0005737;GO:0008219;GO:0007049	molecular_function;ion binding;kinase activity;cellular protein modification process;signal transduction;cellular_component;organelle;nucleus;cytoplasm;cell death;cell cycle	04070+2.7.11.13
ENSONIG00000008980	polypeptide N-acetylgalactosaminyltransferase 13	galnt13	111.608	86.1749	1.2957	0.373734	6.62515	12.273	0.000459558	0.047265	1	protein_coding	ZDB-GENE-091204-444	100707286	I3JQZ8	GO:0016020;GO:0016021;GO:0016740;GO:0016757;GO:0030246;GO:0006486;GO:0005794;GO:0000139	membrane;integral component of membrane;transferase activity;transferase activity, transferring glycosyl groups;carbohydrate binding;protein glycosylation;Golgi apparatus;Golgi membrane	cellular_component;molecular_function;biological_process	PTHR11675_SF21	POLYPEPTIDE N ACETYLGALACTOSAMINYLTRANSFERASE 13 EC_2.4.1.41 POLYPEPTIDE GALNAC TRANSFERASE 13 GALNAC T13 PP GANTASE 13 UDP ACETYLGALACTOSAMINYLTRANSFERASE 13 UDP GALNAC:POLYPEPTIDE N ACETYLGALACTOSAMINYLTRANSFERASE 13	GO:0005575;GO:0016757;GO:0003674;GO:0006464;GO:0043226;GO:0005794	cellular_component;transferase activity, transferring glycosyl groups;molecular_function;cellular protein modification process;organelle;Golgi apparatus
ENSONIG00000007360	zinc finger protein 423	si:ch211-216l23.1	29.491	39.4677	-1.33484	-0.416662	5.06345	12.1041	0.000503124	0.0511572	2	protein_coding	ZDB-GENE-060503-121			GO:0003676	nucleic acid binding	molecular_function	PTHR24385_SF49	ZINC FINGER 423 OLF1/EBF ASSOCIATED ZINC FINGER SMAD AND OLF INTERACTING ZINC FINGER	GO:0003674	molecular_function
ENSONIG00000025158			4.70209	12.5464	-2.66129	-1.41213	3.05771	12.1038	0.000503185	0.0511572	1	lincRNA
ENSONIG00000005941	RNA binding motif protein 33a	rbm33a	43.0507	59.7595	-1.38516	-0.47005	5.64098	12.0746	0.000511132	0.0516682	3	protein_coding	ZDB-GENE-140106-90			GO:0003676	nucleic acid binding	molecular_function	PTHR22014	RNA BINDING 33 PROLINE RICH 8 RNA BINDING MOTIF 33	GO:0003674	molecular_function
ENSONIG00000012005	family with sequence similarity 3 member A	fam3a	132.053	103.786	1.27241	0.347565	6.89913	12.0439	0.000519619	0.0522276	1	protein_coding	ZDB-GENE-040426-1772	100707728	I3K1W7	GO:0045721;GO:0046890	negative regulation of gluconeogenesis;regulation of lipid biosynthetic process	biological_process	PTHR14592	PRECURSOR
ENSONIG00000007284	calpain 8	capn8	0.884636	2.64959	-2.98241	-1.57648	0.55673	11.9983	0.000532478	0.0524445	1	protein_coding	ZDB-GENE-050522-279			GO:0005622;GO:0006508;GO:0004198;GO:0005509;GO:0051493;GO:0008233;GO:0008234;GO:0016787	intracellular;proteolysis;calcium-dependent cysteine-type endopeptidase activity;calcium ion binding;regulation of cytoskeleton organization;peptidase activity;cysteine-type peptidase activity;hydrolase activity	cellular_component;biological_process;molecular_function	PTHR10183_SF268	CALPAIN 2 CATALYTIC SUBUNIT EC_3.4.22.53 CALCIUM ACTIVATED NEUTRAL PROTEINASE 2 CANP 2 CALPAIN M TYPE CALPAIN 2 LARGE SUBUNIT MILLIMOLAR CALPAIN M CALPAIN	GO:0003674;GO:0043167;GO:0005575;GO:0005622;GO:0008233	molecular_function;ion binding;cellular_component;intracellular;peptidase activity
ENSONIG00000007292	fatty acid synthase	fasn	104.722	134.202	-1.28046	-0.35666	6.86373	12.0106	0.000528982	0.0524445	1	protein_coding	ZDB-GENE-030131-7802			GO:0016788;GO:0016740;GO:0009058;GO:0003824;GO:0016491;GO:0004312;GO:0031177;GO:0055114;GO:0061959	hydrolase activity, acting on ester bonds;transferase activity;biosynthetic process;catalytic activity;oxidoreductase activity;fatty acid synthase activity;phosphopantetheine binding;oxidation-reduction process;response to (R)-carnitine	molecular_function;biological_process	PTHR11712_SF227	FATTY ACID SYNTHASE EC_2.3.1.85 [INCLUDES [ACYL CARRIER PROTEIN] S ACETYLTRANSFERASE EC_2.3.1.- 38 ; [ACYL CARRIER PROTEIN] S MALONYLTRANSFERASE EC_2.3.-.- 1 39 ; 3 OXOACYL [ACYL CARRIER PROTEIN] SYNTHASE EC 2.3.1.41 ; 3 OXOACYL [ACYL CARRIER PROTEIN] REDUCTASE EC 1.1.1.- 100 ; 3 HYDROXYACYL [ACYL CARRIER PROTEIN] DEHYDRATASE EC 4.2.-.- 1 59 ; ENOYL [ACYL CARRIER PROTEIN] REDUCTASE EC 1 3 1 39 ; …	GO:0016491;GO:0003674;GO:0009058;GO:0016746;GO:0043167	oxidoreductase activity;molecular_function;biosynthetic process;transferase activity, transferring acyl groups;ion binding	00780+1.1.1.100+4.2.1.59+2.3.1.41;00061+1.1.1.100+2.3.1.85+2.3.1.39+4.2.1.59+2.3.1.41+3.1.2.14
ENSONIG00000007358	CCR4-NOT transcription complex, subunit 1	cnot1	98.6404	137.297	-1.39115	-0.476276	6.88579	11.9943	0.000533636	0.0524445	1	protein_coding	ZDB-GENE-040915-1			GO:0006417;GO:0030015	regulation of translation;CCR4-NOT core complex	biological_process;cellular_component	PTHR13162	CCR4 NOT TRANSCRIPTION COMPLEX SUBUNIT 1 CCR4 ASSOCIATED FACTOR 1	GO:0032991;GO:0005575	protein-containing complex;cellular_component
ENSONIG00000011301	calcium-binding mitochondrial carrier protein SCaMC-2-B	slc25a25b	188.566	147.027	1.28223	0.358659	7.36513	12.0144	0.000527902	0.0524445	2	protein_coding	ZDB-GENE-060526-340	100697124	I3JZD0;I3JZD1	GO:0005743;GO:0055085;GO:0022857;GO:0005509;GO:0016020;GO:0016021	mitochondrial inner membrane;transmembrane transport;transmembrane transporter activity;calcium ion binding;membrane;integral component of membrane	cellular_component;biological_process;molecular_function	PTHR24089_SF222	CALCIUM BINDING MITOCHONDRIAL CARRIER SCAMC 2 SMALL CALCIUM BINDING MITOCHONDRIAL CARRIER 2 SOLUTE CARRIER FAMILY 25 MEMBER 25	GO:0003674;GO:0043167;GO:0022857;GO:0006810;GO:0055085;GO:0005575	molecular_function;ion binding;transmembrane transporter activity;transport;transmembrane transport;cellular_component
ENSONIG00000002436	si:ch211-221f10.2	si:ch211-221f10.2	8.69221	15.1156	-1.73192	-0.792374	3.51409	11.9678	0.000541277	0.0529016	1	protein_coding	ZDB-GENE-140106-124		I3J2F8	GO:0042626;GO:0016887;GO:0055085;GO:0016021;GO:0005524;GO:0016020;GO:0000166	ATPase activity, coupled to transmembrane movement of substances;ATPase activity;transmembrane transport;integral component of membrane;ATP binding;membrane;nucleotide binding	molecular_function;biological_process;cellular_component	PTHR24223_SF196	MULTIDRUG RESISTANCE ASSOCIATED 5 ATP BINDING CASSETTE SUB FAMILY C MEMBER 5 MULTI SPECIFIC ORGANIC ANION TRANSPORTER C MOAT C SMRP	GO:0003674;GO:0043167;GO:0005575;GO:0006810;GO:0055085;GO:0016887;GO:0022857	molecular_function;ion binding;cellular_component;transport;transmembrane transport;ATPase activity;transmembrane transporter activity
ENSONIG00000000709	kinesin family member 17	kif17	10.4526	4.58566	2.27264	1.18437	3.27993	11.8756	0.000568746	0.0538027	1	protein_coding	ZDB-GENE-080724-12			GO:0007018;GO:0008017;GO:0003777;GO:0005524;GO:0000166;GO:0005874;GO:0030030;GO:0035845;GO:0042462;GO:0005871;GO:0005930;GO:0036064	microtubule-based movement;microtubule binding;microtubule motor activity;ATP binding;nucleotide binding;microtubule;cell projection organization;photoreceptor cell outer segment organization;eye photoreceptor cell development;kinesin complex;axoneme;ciliary basal body	biological_process;molecular_function;cellular_component	PTHR24115_SF415	KINESIN	GO:0003674;GO:0043167;GO:0008092;GO:0005575;GO:0048856;GO:0032991;GO:0005815	molecular_function;ion binding;cytoskeletal protein binding;cellular_component;anatomical structure development;protein-containing complex;microtubule organizing center
ENSONIG00000004857			17.141	23.5886	-1.3733	-0.457647	4.38043	11.9255	0.000553697	0.0538027	1	protein_coding				GO:0003723;GO:0003676	RNA binding;nucleic acid binding	molecular_function	PTHR10548_SF10	PROBABLE SPLICING FACTOR ARGININE/SERINE RICH 3 CESF2 CESF2/ASF	GO:0003674;GO:0003723	molecular_function;RNA binding
ENSONIG00000007578	SVOP-like	svopl	1.36202	0.499697	2.72522	1.44637	0.19755	11.8837	0.00056628	0.0538027	1	protein_coding	ZDB-GENE-041114-109			GO:0055085;GO:0016021;GO:0016020	transmembrane transport;integral component of membrane;membrane	biological_process;cellular_component	PTHR24064_SF175	TRANSPORTER SVOPL SVOP	GO:0005575;GO:0006810;GO:0055085	cellular_component;transport;transmembrane transport
ENSONIG00000008244			0.996054	2.9304	-2.91195	-1.54199	1.00006	11.9061	0.000559498	0.0538027	1	protein_coding				GO:0005515	protein binding	molecular_function	PTHR24109	LEUCINE RICH REPEAT CONTAINING 31	GO:0003674	molecular_function
ENSONIG00000017753	ribosomal protein L11	rpl11	273.55	392.05	-1.43293	-0.518965	8.51767	11.8966	0.000562371	0.0538027	1	protein_coding	ZDB-GENE-040625-147			GO:0005622;GO:0005840;GO:0006412;GO:0003735;GO:0006915;GO:0030097;GO:0030218;GO:0042541;GO:0042593;GO:0043009;GO:0045088;GO:0048821	intracellular;ribosome;translation;structural constituent of ribosome;apoptotic process;hemopoiesis;erythrocyte differentiation;hemoglobin biosynthetic process;glucose homeostasis;chordate embryonic development;regulation of innate immune response;erythrocyte development	cellular_component;biological_process;molecular_function	PTHR11994	60S RIBOSOMAL L11	GO:0003674;GO:0005198;GO:0003735;GO:0009058;GO:0034641;GO:0006412;GO:0032991;GO:0005575;GO:0043226;GO:0005840;GO:0005622;GO:0008219;GO:0048856;GO:0002376;GO:0042592;GO:0030154;GO:0009790	molecular_function;structural molecule activity;structural constituent of ribosome;biosynthetic process;cellular nitrogen compound metabolic process;translation;protein-containing complex;cellular_component;organelle;ribosome;intracellular;cell death;anatomical structure development;immune system process;homeostatic process;cell differentiation;embryo development
ENSONIG00000024680			57.4945	81.4218	-1.41382	-0.499594	6.09956	11.8778	0.000568065	0.0538027	1	lincRNA
ENSONIG00000003062	glyoxalase I	glo1	46.1274	62.0813	-1.34469	-0.427277	5.81656	11.8655	0.000571822	0.053806	1	protein_coding	ZDB-GENE-030722-9	100710103	I3J4P3	GO:0004462;GO:0046872;GO:0016829	lactoylglutathione lyase activity;metal ion binding;lyase activity	molecular_function	PTHR10374_SF2	LACTOYLGLUTATHIONE LYASE EC_4.4.1.5 ALDOKETOMUTASE GLYOXALASE I GLX I KETONE ALDEHYDE MUTASE METHYLGLYOXALASE S D LACTOYLGLUTATHIONE METHYLGLYOXAL LYASE	GO:0003674;GO:0043167;GO:0016829	molecular_function;ion binding;lyase activity	00620+4.4.1.5
ENSONIG00000006746	endothelin-1		0.790094	2.03975	-2.53255	-1.34059	0.518732	11.8352	0.000581219	0.0538312	2	protein_coding		100694625	I3JI26;I3JI25	GO:0019229;GO:0042310;GO:0005576	regulation of vasoconstriction;vasoconstriction;extracellular region	biological_process;cellular_component	PTHR13874	ENDOTHELIN 1 PRECURSOR PREPROENDOTHELIN 1 PPET1 [CONTAINS BIG ENDOTHELIN 1]	GO:0005575;GO:0005576;GO:0003013	cellular_component;extracellular region;circulatory system process
ENSONIG00000018130			6.15258	10.5704	-1.71103	-0.774863	2.98592	11.8524	0.000575881	0.0538312	1	protein_coding				GO:0016020;GO:0016021	membrane;integral component of membrane	cellular_component	TF658590	UNCHARACTERIZED	GO:0005575	cellular_component
ENSONIG00000018366	phosphoglycerate mutase 1		203.175	164.385	1.2352	0.304745	7.57108	11.8425	0.000578948	0.0538312	1	protein_coding		100692737	I3KPS8	GO:0016868;GO:0006096;GO:0003824;GO:0004619;GO:0016853;GO:0004082	intramolecular transferase activity, phosphotransferases;glycolytic process;catalytic activity;phosphoglycerate mutase activity;isomerase activity;bisphosphoglycerate mutase activity	molecular_function;biological_process	PTHR11931	PHOSPHOGLYCERATE MUTASE EC_5.4.2.11 EC_5.4.2.- 4 BPG DEPENDENT PGAM	GO:0003674;GO:0009058;GO:0044281;GO:0005975;GO:0009056;GO:0006091;GO:0034641;GO:0051186;GO:0034655;GO:0016853	molecular_function;biosynthetic process;small molecule metabolic process;carbohydrate metabolic process;catabolic process;generation of precursor metabolites and energy;cellular nitrogen compound metabolic process;cofactor metabolic process;nucleobase-containing compound catabolic process;isomerase activity	00680+5.4.2.11;00010+5.4.2.11;00260+5.4.2.11
ENSONIG00000000248	small nuclear ribonucleoprotein polypeptides B and B1	snrpb	15.8083	28.323	-1.79064	-0.840477	4.30434	11.7539	0.000607152	0.0553635	1	protein_coding	ZDB-GENE-040426-1819	100700782	I3IUM7	GO:0005634;GO:0003723	nucleus;RNA binding	cellular_component;molecular_function	PTHR10701_SF2	SMALL NUCLEAR RIBONUCLEOPROTEIN ASSOCIATED B' SNRNP B' SNRPB' SM B' SM B' SMB'	GO:0005575;GO:0043226;GO:0005634;GO:0003674;GO:0003723	cellular_component;organelle;nucleus;molecular_function;RNA binding
ENSONIG00000002903	TM2 domain containing 3	tm2d3	183.024	145.029	1.26115	0.334737	7.34863	11.7641	0.000603853	0.0553635	1	protein_coding	ZDB-GENE-070620-20	100705811	I3J444	GO:0016020;GO:0016021	membrane;integral component of membrane	cellular_component	PTHR21016_SF2	TM2 DOMAIN CONTAINING PRECURSOR	GO:0005575	cellular_component
ENSONIG00000017025	signal transducing adaptor molecule 2	stam2	80.2981	62.1456	1.29088	0.368354	6.16331	11.7609	0.000604883	0.0553635	2	protein_coding	ZDB-GENE-041114-64	100698169	I3KK28;I3KK29	GO:0006886;GO:0005515;GO:0005623	intracellular protein transport;protein binding;cell	biological_process;molecular_function;cellular_component	PTHR13856_SF25	SIGNAL TRANSDUCING ADAPTER MOLECULE 2 STAM 2	GO:0003674;GO:0006810;GO:0005575;GO:0005623	molecular_function;transport;cellular_component;cell
ENSONIG00000011302	galactosylgalactosylxylosylprotein 3-beta-glucuronosyltransferase 1	B3GAT1 (1 of many)	46.1311	32.2971	1.42664	0.512624	5.27956	11.7215	0.000617813	0.0560467	1	protein_coding		100708222	I3JZD2	GO:0015018;GO:0016020;GO:0016021;GO:0016740;GO:0006486;GO:0005794;GO:0000139;GO:0046872	galactosylgalactosylxylosylprotein 3-beta-glucuronosyltransferase activity;membrane;integral component of membrane;transferase activity;protein glycosylation;Golgi apparatus;Golgi membrane;metal ion binding	molecular_function;cellular_component;biological_process	PTHR10896_SF21	GALACTOSYLGALACTOSYLXYLOSYLPROTEIN 3 BETA GLUCURONOSYLTRANSFERASE 1 EC_2.4.1.135 BETA 1 3 GLUCURONYLTRANSFERASE 1 GLUCURONOSYLTRANSFERASE P GLCAT P UDP GLCUA:GLYCOPROTEIN BETA 1 3 GLUCURONYLTRANSFERASE GLCUAT P	GO:0005575;GO:0016757;GO:0006464;GO:0043226;GO:0005794;GO:0003674;GO:0043167	cellular_component;transferase activity, transferring glycosyl groups;cellular protein modification process;organelle;Golgi apparatus;molecular_function;ion binding
ENSONIG00000019438	ribosomal protein lateral stalk subunit P0	rplp0	551.862	797.895	-1.44578	-0.531852	9.485	11.6926	0.000627502	0.0566353	1	protein_coding	ZDB-GENE-000629-1	100534569	I3KTM3	GO:0042254;GO:0005622;GO:0005840	ribosome biogenesis;intracellular;ribosome	biological_process;cellular_component	PTHR21141_SF3	60S ACIDIC RIBOSOMAL P0	GO:0005575;GO:0005622;GO:0042254;GO:0032991;GO:0043226;GO:0005840	cellular_component;intracellular;ribosome biogenesis;protein-containing complex;organelle;ribosome
ENSONIG00000017923	ribosomal protein L10	rpl10	220.806	312.971	-1.41703	-0.502874	8.17476	11.6763	0.000633022	0.0568434	1	protein_coding	ZDB-GENE-030131-8656	100697190	I3KN95	GO:0005622;GO:0005840;GO:0006412;GO:0003735;GO:0045182;GO:0006417;GO:0007420;GO:1990403	intracellular;ribosome;translation;structural constituent of ribosome;translation regulator activity;regulation of translation;brain development;embryonic brain development	cellular_component;biological_process;molecular_function	PTHR11726	60S RIBOSOMAL L10	GO:0003674;GO:0005198;GO:0003735;GO:0009058;GO:0034641;GO:0006412;GO:0032991;GO:0005575;GO:0043226;GO:0005840;GO:0005622;GO:0048856	molecular_function;structural molecule activity;structural constituent of ribosome;biosynthetic process;cellular nitrogen compound metabolic process;translation;protein-containing complex;cellular_component;organelle;ribosome;intracellular;anatomical structure development
ENSONIG00000001326	fatty acid-binding protein, brain	fabp7a	83.1186	127.311	-1.53069	-0.614185	6.84273	11.6644	0.000637082	0.0569191	1	protein_coding	ZDB-GENE-000627-1	100690908	I3IYI6	GO:0008289	lipid binding	molecular_function	PTHR11955_SF57	FATTY ACID BINDING PROTEIN BRAIN BRAIN TYPE FATTY ACID BINDING B FABP FATTY ACID BINDING 7	GO:0003674;GO:0008289	molecular_function;lipid binding
ENSONIG00000008652	corepressor interacting with RBPJ, 1	si:ch73-167c12.2	15.171	21.5073	-1.41297	-0.498732	4.18453	11.6419	0.000644826	0.0570349	1	protein_coding	ZDB-GENE-100922-268		I3JPT3	GO:0003714;GO:1903507	transcription corepressor activity;negative regulation of nucleic acid-templated transcription	molecular_function;biological_process	PTHR13151	COREPRESSOR INTERACTING WITH RBPJ 1 CBF1 INTERACTING COREPRESSOR	GO:0003674	molecular_function
ENSONIG00000016533	inter-alpha-trypsin inhibitor heavy chain family member 6	itih6	1.781	0.496453	3.58323	1.84126	0.662802	11.644	0.000644098	0.0570349	2	protein_coding	ZDB-GENE-050603-1	100700703	I3KI76;I3KI77	GO:0004867;GO:0030212;GO:0010951	serine-type endopeptidase inhibitor activity;hyaluronan metabolic process;negative regulation of endopeptidase activity	molecular_function;biological_process	PTHR10338_SF10	INTER ALPHA TRYPSIN INHIBITOR HEAVY CHAIN H6 PRECURSOR INTER ALPHA TRYPSIN INHIBITOR HEAVY CHAIN H5 INTER ALPHA INHIBITOR H5	GO:0003674;GO:0030234;GO:0044281	molecular_function;enzyme regulator activity;small molecule metabolic process
ENSONIG00000013940	glutathione S-transferase theta-1	gstt1a	2.27313	5.06332	-2.23944	-1.16314	1.99101	11.5799	0.000666689	0.0575304	1	protein_coding	ZDB-GENE-031001-13	100692070	I3K8S6	GO:0005515;GO:0004364	protein binding;glutathione transferase activity	molecular_function	PTHR11260_SF177	GLUTATHIONE S TRANSFERASE THETA 1	GO:0003674;GO:0016765	molecular_function;transferase activity, transferring alkyl or aryl (other than methyl) groups	00480+2.5.1.18;00980+2.5.1.18;00983+2.5.1.18;00982+2.5.1.18
ENSONIG00000014529	ribosomal protein S6	rps6	253.631	346.069	-1.36427	-0.448124	8.33635	11.5905	0.000662901	0.0575304	1	protein_coding	ZDB-GENE-040801-8	100707655	I3KAY7	GO:0005622;GO:0005840;GO:0006412;GO:0003735	intracellular;ribosome;translation;structural constituent of ribosome	cellular_component;biological_process;molecular_function	PTHR11502	40S RIBOSOMAL S6	GO:0003674;GO:0005198;GO:0003735;GO:0009058;GO:0034641;GO:0006412;GO:0032991;GO:0005575;GO:0043226;GO:0005840;GO:0005622	molecular_function;structural molecule activity;structural constituent of ribosome;biosynthetic process;cellular nitrogen compound metabolic process;translation;protein-containing complex;cellular_component;organelle;ribosome;intracellular
ENSONIG00000017705	La ribonucleoprotein domain family member 4B	LARP4B	13.156	20.7501	-1.57355	-0.654027	4.06065	11.6155	0.000654052	0.0575304	2	protein_coding		100692573	I3KMH9;I3KMI0	GO:0003676;GO:0003723	nucleic acid binding;RNA binding	molecular_function	PTHR22792_SF43	LA RELATED 4B LA RIBONUCLEOPROTEIN DOMAIN FAMILY MEMBER 4B LA RIBONUCLEOPROTEIN DOMAIN FAMILY MEMBER 5 LA RELATED 5	GO:0003674;GO:0003723	molecular_function;RNA binding
ENSONIG00000018968	capping actin protein, gelsolin like	capgb	6.69642	10.7289	-1.61311	-0.689843	3.18137	11.5832	0.000665493	0.0575304	1	protein_coding	ZDB-GENE-030131-8541	100699618	I3KRY6	GO:0051016;GO:0051015	barbed-end actin filament capping;actin filament binding	biological_process;molecular_function	PTHR11977_SF13	MACROPHAGE CAPPING ACTIN REGULATORY CAP G	GO:0003674;GO:0008092	molecular_function;cytoskeletal protein binding
ENSONIG00000019224	mago homolog, exon junction complex subunit	magoh	50.1959	70.3433	-1.39913	-0.484532	6.04666	11.6023	0.000658689	0.0575304	1	protein_coding	ZDB-GENE-041216-1	100698665	I3KSV1	GO:0008380;GO:0005634;GO:0035145	RNA splicing;nucleus;exon-exon junction complex	biological_process;cellular_component	PTHR12638	MAGO NASHI HOMOLOG	GO:0005575;GO:0043226;GO:0005634;GO:0034641;GO:0032991	cellular_component;organelle;nucleus;cellular nitrogen compound metabolic process;protein-containing complex
ENSONIG00000003773	retinal Mueller cells isomerohydrolase	rpe65b	13.8229	9.14249	1.50993	0.594481	3.56556	11.5559	0.000675342	0.0578458	1	protein_coding	ZDB-GENE-050410-16	100694376	I3J7A6	GO:0016702;GO:0055114;GO:0046872	oxidoreductase activity, acting on single donors with incorporation of molecular oxygen, incorporation of two atoms of oxygen;oxidation-reduction process;metal ion binding	molecular_function;biological_process	PTHR10543	RETINOID ISOMEROHYDROLASE EC_3.1.1.64 ALL TRANS RETINYL PALMITATE HYDROLASE MESO ZEAXANTHIN ISOMERASE EC_5.3.3.- RETINAL PIGMENT EPITHELIUM SPECIFIC 65 KDA RETINOL ISOMERASE	GO:0003674;GO:0043167	molecular_function;ion binding
ENSONIG00000013848	dpy-19 like 4	DPY19L4	39.6526	30.1094	1.31598	0.396142	5.1763	11.5517	0.000676884	0.0578458	1	protein_coding		100691367	I3K8G7	GO:0016021;GO:0016020	integral component of membrane;membrane	cellular_component	PTHR31488	PROBABLE C MANNOSYLTRANSFERASE DP EC_2.4.1.- DPY 19 DPY 19 HOMOLOG	GO:0005575	cellular_component
ENSONIG00000011361	glucosamine-6-phosphate deaminase 2		50.5568	38.1768	1.32288	0.403682	5.51115	11.5071	0.000693293	0.0589035	1	protein_coding		100698532	I3JZK4	GO:0005975;GO:0006044;GO:0004342;GO:0005737;GO:0016787	carbohydrate metabolic process;N-acetylglucosamine metabolic process;glucosamine-6-phosphate deaminase activity;cytoplasm;hydrolase activity	biological_process;molecular_function;cellular_component	PTHR11280	GLUCOSAMINE 6 PHOSPHATE ISOMERASE EC_3.5.99.6 GLUCOSAMINE 6 PHOSPHATE DEAMINASE GNPDA GLCN6P DEAMINASE	GO:0005975;GO:0016853;GO:0005575;GO:0005737	carbohydrate metabolic process;isomerase activity;cellular_component;cytoplasm	00520+3.5.99.6
ENSONIG00000022376			18.5508	26.6351	-1.4355	-0.521551	4.51107	11.5001	0.00069592	0.0589035	1	lincRNA
ENSONIG00000013283	transmembrane protein 208	zgc:77041	19.3715	26.3703	-1.36211	-0.445843	4.54662	11.4691	0.000707614	0.059608	1	protein_coding	ZDB-GENE-040426-2523	100692840	I3K6G2	GO:0016020;GO:0016021	membrane;integral component of membrane	cellular_component	PTHR13505	TRANSMEMBRANE 208	GO:0005575	cellular_component
ENSONIG00000017694	polycystic kidney disease 1a	pkd1a	17.3443	25.755	-1.48376	-0.569262	4.4278	11.4547	0.000713144	0.0597892	1	protein_coding	ZDB-GENE-100707-1			GO:0001822;GO:0016021;GO:0005515;GO:0016020;GO:0001889;GO:0001946;GO:0032965;GO:0048793	kidney development;integral component of membrane;protein binding;membrane;liver development;lymphangiogenesis;regulation of collagen biosynthetic process;pronephros development	biological_process;cellular_component;molecular_function	PTHR10877_SF118	POLYCYSTIC KIDNEY DISEASE 1 FRAGMENT	GO:0003674;GO:0005575;GO:0048856;GO:0048646	molecular_function;cellular_component;anatomical structure development;anatomical structure formation involved in morphogenesis
ENSONIG00000001626	small integral membrane protein 8	smim8	15.4602	23.4671	-1.51698	-0.601206	4.43741	11.4125	0.000729512	0.060873	1	protein_coding	ZDB-GENE-050522-423			GO:0016020;GO:0016021	membrane;integral component of membrane	cellular_component	PTHR14274	SMALL INTEGRAL MEMBRANE 8	GO:0005575	cellular_component
ENSONIG00000012302	attractin	atrn	52.8029	71.8969	-1.3599	-0.443502	5.90668	11.3776	0.000743361	0.0617374	1	protein_coding	ZDB-GENE-090312-21			GO:0005515;GO:0016020;GO:0016021	protein binding;membrane;integral component of membrane	molecular_function;cellular_component	PTHR10574_SF223	ATTRACTIN PRECURSOR	GO:0003674;GO:0005575	molecular_function;cellular_component
ENSONIG00000006305	ephrin-A1b	efna1b	55.1845	42.5231	1.29581	0.373858	5.57713	11.3407	0.000758261	0.0626806	1	protein_coding	ZDB-GENE-041007-5			GO:0048013;GO:0046875;GO:0016020	ephrin receptor signaling pathway;ephrin receptor binding;membrane	biological_process;molecular_function;cellular_component	PTHR11304_SF19	EPHRIN A1 PRECURSOR EPH RELATED RECEPTOR TYROSINE KINASE LIGAND 1 LERK 1 IMMEDIATE EARLY RESPONSE B61 [CONTAINS EPHRIN A1 SECRETED FORM]	GO:0005575;GO:0003674;GO:0007165	cellular_component;molecular_function;signal transduction
ENSONIG00000001074	cholesterol 24-hydroxylase	cyp46a1.4	32.8241	24.2107	1.35303	0.436193	4.89385	11.3171	0.000767955	0.0631866	1	protein_coding	ZDB-GENE-040426-1224	100704054	I3IXM3	GO:0006707;GO:0033781;GO:0020037;GO:0016705;GO:0005506;GO:0055114;GO:0016020;GO:0016021;GO:0016491;GO:0046872;GO:0004497	cholesterol catabolic process;cholesterol 24-hydroxylase activity;heme binding;oxidoreductase activity, acting on paired donors, with incorporation or reduction of molecular oxygen;iron ion binding;oxidation-reduction process;membrane;integral component of membrane;oxidoreductase activity;metal ion binding;monooxygenase activity	biological_process;molecular_function;cellular_component	PTHR24293	CHOLESTEROL 24 HYDROXYLASE CH24H EC_1.14.14.25 CYTOCHROME P450 46A1	GO:0003674;GO:0043167;GO:0016491;GO:0044281;GO:0009056;GO:0006629;GO:0005575	molecular_function;ion binding;oxidoreductase activity;small molecule metabolic process;catabolic process;lipid metabolic process;cellular_component	00120+1.14.14.25
ENSONIG00000015876	synuclein, gamma b (breast cancer-specific protein 1)	sncgb	140.428	183.025	-1.3031	-0.381948	7.379	11.2736	0.000786167	0.0643856	1	protein_coding	ZDB-GENE-050522-235			GO:0008345;GO:0071542	larval locomotory behavior;dopaminergic neuron differentiation	biological_process	PTHR13820	SYNUCLEIN	GO:0030154	cell differentiation
ENSONIG00000015052	coiled-coil serine-rich protein 1	ccser1	13.9397	20.0735	-1.43851	-0.524574	4.04522	11.2604	0.000791793	0.0645476	1	protein_coding	ZDB-GENE-081104-422						PTHR22461	SERINE RICH COILED COIL DOMAIN CONTAINING COILED COIL SERINE RICH
ENSONIG00000007366	cerebellin 1 precursor	cbln1	546.287	432.745	1.2621	0.33583	8.89076	11.23	0.000804875	0.0650148	1	protein_coding	ZDB-GENE-040718-226	100695969	I3JK99	GO:0005515	protein binding	molecular_function	PTHR22923_SF5	CEREBELLIN 1 PRECURSOR PRECEREBELLIN [CONTAINS CEREBELLIN CER ; [DES SER1] CEREBELLIN DES CEREBELLIN ]	GO:0003674	molecular_function
ENSONIG00000016034	glycine receptor alpha 2	glra2	62.9386	50.7887	1.24015	0.310517	5.82992	11.2328	0.000803637	0.0650148	2	protein_coding	ZDB-GENE-090407-1	100693907	I3KGF3;I3KGF2	GO:0022824;GO:0016594;GO:0034220;GO:0005230;GO:0005216;GO:0005887;GO:0006811;GO:0004888;GO:0016021;GO:0016020;GO:0005886	transmitter-gated ion channel activity;glycine binding;ion transmembrane transport;extracellular ligand-gated ion channel activity;ion channel activity;integral component of plasma membrane;ion transport;transmembrane signaling receptor activity;integral component of membrane;membrane;plasma membrane	molecular_function;biological_process;cellular_component	PTHR18945_SF28	GLYCINE RECEPTOR SUBUNIT ALPHA 2 PRECURSOR	GO:0005575;GO:0003674;GO:0006810;GO:0022857;GO:0055085;GO:0043167;GO:0005886	cellular_component;molecular_function;transport;transmembrane transporter activity;transmembrane transport;ion binding;plasma membrane
ENSONIG00000015528	ribosomal protein L27a	RPL27A	90.1413	148.893	-1.65111	-0.723433	7.02237	11.1917	0.000821642	0.0660675	2	protein_coding				GO:0005622;GO:0005840;GO:0006412;GO:0003735;GO:0015934	intracellular;ribosome;translation;structural constituent of ribosome;large ribosomal subunit	cellular_component;biological_process;molecular_function	PTHR11721	60S RIBOSOMAL L27A	GO:0003674;GO:0005198;GO:0003735;GO:0009058;GO:0034641;GO:0006412;GO:0032991;GO:0005575;GO:0043226;GO:0005840;GO:0005622	molecular_function;structural molecule activity;structural constituent of ribosome;biosynthetic process;cellular nitrogen compound metabolic process;translation;protein-containing complex;cellular_component;organelle;ribosome;intracellular
ENSONIG00000002351	C-C motif chemokine 17		89.3128	68.7408	1.29777	0.376038	6.37316	11.1781	0.000827683	0.0662521	2	protein_coding		100708142	I3J251;I3J250	GO:0008009;GO:0006955;GO:0005576;GO:0060326	chemokine activity;immune response;extracellular region;cell chemotaxis	molecular_function;biological_process;cellular_component			GO:0005575;GO:0005576;GO:0002376;GO:0048870;GO:0040011	cellular_component;extracellular region;immune system process;cell motility;locomotion
ENSONIG00000018030	cullin associated and neddylation dissociated 1	cand1	47.812	62.4025	-1.30364	-0.382551	5.75489	11.1636	0.000834188	0.066472	1	protein_coding	ZDB-GENE-040426-2872	100708269	I3KNM6	GO:0010265	SCF complex assembly	biological_process	PTHR12696	CULLIN ASSOCIATED NEDD8 DISSOCIATED 1 CULLIN ASSOCIATED AND NEDDYLATION DISSOCIATED 1	GO:0022607;GO:0065003	cellular component assembly;protein-containing complex assembly
ENSONIG00000000180	mitogen-activated protein kinase 6	mapk6	143.039	196.499	-1.37319	-0.457532	7.44202	11.1551	0.000837996	0.066476	2	protein_coding	ZDB-GENE-050420-7	100709832	I3IUE3;I3IUE4	GO:0004707;GO:0006468;GO:0004672;GO:0005524;GO:0000165	MAP kinase activity;protein phosphorylation;protein kinase activity;ATP binding;MAPK cascade	molecular_function;biological_process	PTHR24055_SF171	MITOGEN ACTIVATED KINASE 6 MAP KINASE 6 MAPK 6 EC_2.7.11.24 EXTRACELLULAR SIGNAL REGULATED KINASE 3 ERK 3	GO:0003674;GO:0043167;GO:0016301;GO:0006464;GO:0007165	molecular_function;ion binding;kinase activity;cellular protein modification process;signal transduction	04150+2.7.11.24
ENSONIG00000000059	TTK protein kinase	ttk	5.79459	2.7224	2.1136	1.0797	2.15712	11.1238	0.000852281	0.066611	2	protein_coding	ZDB-GENE-030123-1	100698249	I3ITY1;I3ITY2	GO:0051304;GO:0007093;GO:0004712;GO:0006468;GO:0004672;GO:0005524;GO:0005515	chromosome separation;mitotic cell cycle checkpoint;protein serine/threonine/tyrosine kinase activity;protein phosphorylation;protein kinase activity;ATP binding;protein binding	biological_process;molecular_function	PTHR22974	SERINE/THREONINE KINASE TOUSLED EC_2.7.11.1 TOUSLED KINASE	GO:0003674;GO:0043167;GO:0016301;GO:0006464	molecular_function;ion binding;kinase activity;cellular protein modification process
ENSONIG00000009676	glutathione S-transferase	gsta	22.3234	52.3512	-2.3446	-1.22934	5.04893	11.1286	0.000850048	0.066611	1	protein_coding		100534426	A8WE65	GO:0004364;GO:0005515;GO:0016740	glutathione transferase activity;protein binding;transferase activity	molecular_function	PTHR11571_SF101	GLUTATHIONE S TRANSFERASE EC_2.5.1.18 GST A4 4 GST GLUTATHIONE S TRANSFERASE GST	GO:0003674;GO:0016765	molecular_function;transferase activity, transferring alkyl or aryl (other than methyl) groups	00480+2.5.1.18;00980+2.5.1.18;00983+2.5.1.18;00982+2.5.1.18
ENSONIG00000012780	complement component C7	c7b	7.064	12.7739	-1.82385	-0.866985	3.21204	11.1184	0.00085476	0.066611	2	protein_coding	ZDB-GENE-021120-1	100697225	I3K4P3;I3K4P4	GO:0006956;GO:0006955;GO:0005515;GO:0005579	complement activation;immune response;protein binding;membrane attack complex	biological_process;molecular_function;cellular_component	PTHR19325_SF312	COMPLEMENT COMPONENT C7 PRECURSOR	GO:0003674;GO:0002376;GO:0032991;GO:0005575	molecular_function;immune system process;protein-containing complex;cellular_component
ENSONIG00000026732			0.402845	1.8232	-4.49293	-2.16766	-0.0937119	11.1232	0.000852558	0.066611	1	lincRNA
ENSONIG00000014432	potassium voltage-gated channel interacting protein 3	KCNIP3	49.5416	39.4247	1.25496	0.327636	5.49028	11.0753	0.000874874	0.0678795	1	protein_coding			I3KAK1	GO:0005509;GO:0016020;GO:0016021	calcium ion binding;membrane;integral component of membrane	molecular_function;cellular_component	PTHR23055_SF61	CALSENILIN A TYPE POTASSIUM CHANNEL MODULATORY 3 DRE ANTAGONIST MODULATOR DREAM KV CHANNEL INTERACTING 3 KCHIP3	GO:0003674;GO:0043167;GO:0005575	molecular_function;ion binding;cellular_component
ENSONIG00000012720	transcription factor 4	TCF4	37.1111	52.3696	-1.40775	-0.493394	5.46297	11.0647	0.000879851	0.0679676	2	protein_coding				GO:0046983	protein dimerization activity	molecular_function	PTHR11793_SF10	TRANSCRIPTION FACTOR 4 TCF 4 CLASS HELIX LOOP HELIX IMMUNOGLOBULIN TRANSCRIPTION FACTOR 2 ITF 2 SL3 3 ENHANCER FACTOR 2 SEF 2	GO:0003674	molecular_function
ENSONIG00000005772	protein FAM162B	fam162a	198.519	245.116	-1.23481	-0.304285	7.79609	11.0488	0.000887467	0.068083	2	protein_coding	ZDB-GENE-030131-8307	100698117	I3JEI2;I3JEI1	GO:0016020;GO:0016021	membrane;integral component of membrane	cellular_component	PTHR13674	AMBIGUOUS	GO:0005575	cellular_component
ENSONIG00000010223	transglutaminase 2, like	tgm2l (1 of many)	67.0131	97.4475	-1.45436	-0.540384	6.41871	11.0375	0.000892891	0.068083	1	protein_coding	ZDB-GENE-050420-97			GO:0018149;GO:0003810;GO:0046872	peptide cross-linking;protein-glutamine gamma-glutamyltransferase activity;metal ion binding	biological_process;molecular_function	PTHR11590	GLUTAMINE GAMMA GLUTAMYLTRANSFERASE EC_2.3.2.13 TRANSGLUTAMINASE TG TGASE TRANSGLUTAMINASE TGASE	GO:0016746;GO:0006464;GO:0003674;GO:0043167	transferase activity, transferring acyl groups;cellular protein modification process;molecular_function;ion binding
ENSONIG00000012808	tight junction protein 2a (zona occludens 2)	tjp2a	19.7584	26.4789	-1.34208	-0.424476	4.57812	11.0444	0.000889542	0.068083	2	protein_coding	ZDB-GENE-070925-2			GO:0005923;GO:0005515;GO:0016020;GO:0016021	bicellular tight junction;protein binding;membrane;integral component of membrane	cellular_component;molecular_function	PTHR13865_SF26	TIGHT JUNCTION ZO 2 TIGHT JUNCTION 2 ZONA OCCLUDENS 2 ZONULA OCCLUDENS 2	GO:0003674;GO:0005575	molecular_function;cellular_component
ENSONIG00000016692	limbic system associated membrane protein	LSAMP	213.192	160.851	1.326	0.407086	7.59722	11.0108	0.000905827	0.068171	1	protein_coding			I3KIT4				PTHR19831_SF10	LIMBIC SYSTEM ASSOCIATED MEMBRANE PRECURSOR
ENSONIG00000017545	NADH:ubiquinone oxidoreductase subunit B6	ndufb6	35.251	49.692	-1.40841	-0.494066	5.5572	11.0076	0.000907377	0.068171	1	protein_coding	ZDB-GENE-040426-1781	100707916	I3KLX8	GO:0006120;GO:0005747	mitochondrial electron transport, NADH to ubiquinone;mitochondrial respiratory chain complex I	biological_process;cellular_component	PTHR15083	NADH DEHYDROGENASE [UBIQUINONE] 1 BETA SUBCOMPLEX SUBUNIT 6 COMPLEX I B17 CI B17 NADH UBIQUINONE OXIDOREDUCTASE B17 SUBUNIT	GO:0044281;GO:0006091;GO:0034641;GO:0032991;GO:0005575	small molecule metabolic process;generation of precursor metabolites and energy;cellular nitrogen compound metabolic process;protein-containing complex;cellular_component
ENSONIG00000018462	cathepsin Z		52.4565	41.3891	1.26653	0.340881	5.55173	11.004	0.000909154	0.068171	2	protein_coding		100696456	I3KQ47;I3KQ48	GO:0008234;GO:0006508	cysteine-type peptidase activity;proteolysis	molecular_function;biological_process	PTHR12411_SF14	CATHEPSIN Z PRECURSOR EC_3.4.18.1	GO:0008233	peptidase activity
ENSONIG00000023379			23.0092	33.2	-1.43909	-0.525159	4.93309	11.0034	0.00090946	0.068171	2	lincRNA
ENSONIG00000002046	ATP synthase peripheral stalk subunit d	atp5pd	47.4695	63.6175	-1.34003	-0.422268	5.85838	10.9384	0.000941935	0.0694738	1	protein_coding	ZDB-GENE-040426-1658			GO:0000276;GO:0015986;GO:0015078;GO:0016020;GO:0006811;GO:0005739;GO:0005743	mitochondrial proton-transporting ATP synthase complex, coupling factor F(o);ATP synthesis coupled proton transport;proton transmembrane transporter activity;membrane;ion transport;mitochondrion;mitochondrial inner membrane	cellular_component;biological_process;molecular_function	PTHR12700	ATP SYNTHASE SUBUNIT D MITOCHONDRIAL	GO:0022857;GO:0003674;GO:0009058;GO:0044281;GO:0006810;GO:0034641;GO:0055085;GO:0032991;GO:0005575;GO:0043226;GO:0005739	transmembrane transporter activity;molecular_function;biosynthetic process;small molecule metabolic process;transport;cellular nitrogen compound metabolic process;transmembrane transport;protein-containing complex;cellular_component;organelle;mitochondrion
ENSONIG00000007133	QKI, KH domain containing, RNA binding b	qkib	27.5161	36.6882	-1.33371	-0.415444	4.99661	10.9385	0.000941847	0.0694738	1	protein_coding	ZDB-GENE-081028-54			GO:0003723;GO:0003676	RNA binding;nucleic acid binding	molecular_function	PTHR11208_SF36	QUAKING	GO:0003674;GO:0003723	molecular_function;RNA binding
ENSONIG00000007470	ribosomal protein L18a	rpl18a	224.952	318.704	-1.41654	-0.502375	8.22236	10.9294	0.000946477	0.0694738	1	protein_coding	ZDB-GENE-040426-1071	100706131	I3JKM3	GO:0005840;GO:0006412;GO:0003735	ribosome;translation;structural constituent of ribosome	cellular_component;biological_process;molecular_function	PTHR10052	60S RIBOSOMAL L18A	GO:0003674;GO:0005198;GO:0003735;GO:0009058;GO:0034641;GO:0006412;GO:0032991;GO:0005575;GO:0043226;GO:0005840	molecular_function;structural molecule activity;structural constituent of ribosome;biosynthetic process;cellular nitrogen compound metabolic process;translation;protein-containing complex;cellular_component;organelle;ribosome
ENSONIG00000012074			182.914	142.091	1.28652	0.363477	7.31559	10.9598	0.00093109	0.0694738	1	protein_coding				GO:0016020;GO:0016021	membrane;integral component of membrane	cellular_component	PTHR19325_SF6	SUSHI DOMAIN CONTAINING 6 PRECURSOR	GO:0005575	cellular_component
ENSONIG00000015413	spectrin beta chain, non-erythrocytic 1	SPTBN1 (1 of many)	417.788	541.633	-1.29609	-0.374168	8.86286	10.934	0.00094417	0.0694738	2	protein_coding		100711069	I3KE47;I3KE46	GO:0008091;GO:0005200;GO:0005543;GO:0003779;GO:0005515;GO:0005737;GO:0005856;GO:0007010;GO:0051693	spectrin;structural constituent of cytoskeleton;phospholipid binding;actin binding;protein binding;cytoplasm;cytoskeleton;cytoskeleton organization;actin filament capping	cellular_component;molecular_function;biological_process	PTHR11915_SF226	SPECTRIN BETA CHAIN NON ERYTHROCYTIC 1 BETA II SPECTRIN FODRIN BETA CHAIN	GO:0003674;GO:0008092;GO:0043167;GO:0008289;GO:0005198;GO:0005575;GO:0043226;GO:0005856;GO:0005737;GO:0007010	molecular_function;cytoskeletal protein binding;ion binding;lipid binding;structural molecule activity;cellular_component;organelle;cytoskeleton;cytoplasm;cytoskeleton organization
ENSONIG00000001063	dihydropyrimidinase-related protein 5	dpysl5a	161.608	121.901	1.32534	0.406364	7.20736	10.8458	0.000990202	0.0720851	1	protein_coding	ZDB-GENE-030131-3136	100703967	I3IXK8	GO:0007399;GO:0007411;GO:0008017;GO:0016810;GO:0005737;GO:0016787	nervous system development;axon guidance;microtubule binding;hydrolase activity, acting on carbon-nitrogen (but not peptide) bonds;cytoplasm;hydrolase activity	biological_process;molecular_function;cellular_component	PTHR11647	DIHYDROPYRIMIDINASE RELATED DRP	GO:0005575;GO:0005737;GO:0016810;GO:0003674;GO:0008092;GO:0048856	cellular_component;cytoplasm;hydrolase activity, acting on carbon-nitrogen (but not peptide) bonds;molecular_function;cytoskeletal protein binding;anatomical structure development
ENSONIG00000009933	mitogen-activated protein kinase 11	mapk11	145.484	113.515	1.28173	0.358095	7.00909	10.8459	0.000990167	0.0720851	1	protein_coding	ZDB-GENE-040625-75	100700904	I3JUE1	GO:0004707;GO:0006468;GO:0004672;GO:0005524;GO:0016740;GO:0000166;GO:0004674;GO:0016301;GO:0016310;GO:0000165	MAP kinase activity;protein phosphorylation;protein kinase activity;ATP binding;transferase activity;nucleotide binding;protein serine/threonine kinase activity;kinase activity;phosphorylation;MAPK cascade	molecular_function;biological_process	PTHR24055_SF109	MITOGEN ACTIVATED KINASE 11 MAP KINASE 11 MAPK 11 EC_2.7.11.24 MITOGEN ACTIVATED KINASE P38 BETA MAP KINASE P38 BETA P38B	GO:0003674;GO:0043167;GO:0016301;GO:0006464;GO:0007165	molecular_function;ion binding;kinase activity;cellular protein modification process;signal transduction	04150+2.7.11.24
ENSONIG00000008464	ring-box 1	rbx1	35.3753	52.9893	-1.49655	-0.581641	5.63702	10.8011	0.00101439	0.0735435	2	protein_coding	ZDB-GENE-041008-106	100696705	I3JP47;I3JP46	GO:0008270	zinc ion binding	molecular_function	PTHR11210_SF20	RING BOX 1	GO:0003674;GO:0043167	molecular_function;ion binding
ENSONIG00000002078			4.73406	7.91472	-1.66111	-0.732146	2.59905	10.7439	0.00104624	0.0740316	1	protein_coding							PTHR15132	SNRNA ACTIVATING COMPLEX SUBUNIT 2 SNAPC SUBUNIT 2 SMALL NUCLEAR RNA ACTIVATING COMPLEX POLYPEPTIDE 2 SNRNA ACTIVATING COMPLEX 45 KDA SUBUNIT SNAPC 45 KDA SUBUNIT
ENSONIG00000006862	spectrin, beta, non-erythrocytic 1	sptbn1	167.967	212.753	-1.26593	-0.340193	7.56133	10.763	0.00103552	0.0740316	2	protein_coding	ZDB-GENE-031006-3		I3JIG6;I3JIG5	GO:0008091;GO:0005200;GO:0003779;GO:0005515;GO:0005737;GO:0005856;GO:0007010;GO:0051693;GO:0005543	spectrin;structural constituent of cytoskeleton;actin binding;protein binding;cytoplasm;cytoskeleton;cytoskeleton organization;actin filament capping;phospholipid binding	cellular_component;molecular_function;biological_process	PTHR11915_SF226	SPECTRIN BETA CHAIN NON ERYTHROCYTIC 1 BETA II SPECTRIN FODRIN BETA CHAIN	GO:0003674;GO:0008092;GO:0005198;GO:0005575;GO:0043226;GO:0005856;GO:0005737;GO:0007010;GO:0043167;GO:0008289	molecular_function;cytoskeletal protein binding;structural molecule activity;cellular_component;organelle;cytoskeleton;cytoplasm;cytoskeleton organization;ion binding;lipid binding
ENSONIG00000007495	stress-associated endoplasmic reticulum protein 1	zgc:85858	7.11678	11.3482	-1.58746	-0.666723	3.27515	10.776	0.00102825	0.0740316	1	protein_coding	ZDB-GENE-040426-2333	106096424	I3JKQ9	GO:0005783;GO:0016020;GO:0016021;GO:0015031;GO:0005789	endoplasmic reticulum;membrane;integral component of membrane;protein transport;endoplasmic reticulum membrane	cellular_component;biological_process	PTHR15601_SF3	STRESS ASSOCIATED ENDOPLASMIC RETICULUM	GO:0005575;GO:0043226;GO:0005783;GO:0006810	cellular_component;organelle;endoplasmic reticulum;transport
ENSONIG00000014288	telomeric repeat binding factor 1	terf1	0.401105	1.29435	-3.11507	-1.63926	-0.212531	10.7737	0.00102954	0.0740316	2	protein_coding	ZDB-GENE-090612-2	100706372	I3KA16;I3KA17	GO:0042803;GO:0005634;GO:0003677;GO:0000723;GO:0000784;GO:0042162;GO:0007049;GO:0000781;GO:0003691	protein homodimerization activity;nucleus;DNA binding;telomere maintenance;nuclear chromosome, telomeric region;telomeric DNA binding;cell cycle;chromosome, telomeric region;double-stranded telomeric DNA binding	molecular_function;cellular_component;biological_process	PTHR21717_SF14	TELOMERIC REPEAT BINDING FACTOR 1 TTAGGG REPEAT BINDING FACTOR 1	GO:0003674;GO:0003677;GO:0005575;GO:0043226;GO:0005634;GO:0051276;GO:0006259;GO:0034641;GO:0042592;GO:0007049	molecular_function;DNA binding;cellular_component;organelle;nucleus;chromosome organization;DNA metabolic process;cellular nitrogen compound metabolic process;homeostatic process;cell cycle
ENSONIG00000024931			6.9246	3.29205	2.1195	1.08372	2.39411	10.7452	0.00104548	0.0740316	3	lincRNA
ENSONIG00000026416			13.9654	20.9279	-1.50043	-0.585375	4.15726	10.7494	0.00104313	0.0740316	1	lincRNA
ENSONIG00000003175	solute carrier family 7 member 6	slc7a6	7.05627	3.17633	2.20909	1.14345	2.33937	10.6994	0.00107168	0.0753719	1	protein_coding	ZDB-GENE-000607-21	100705016	I3J538	GO:0055085;GO:0022857;GO:0016020;GO:0016021	transmembrane transport;transmembrane transporter activity;membrane;integral component of membrane	biological_process;molecular_function;cellular_component	PTHR11785_SF213	Y+L AMINO ACID TRANSPORTER 2 SOLUTE CARRIER FAMILY 7 MEMBER 6 Y + L TYPE AMINO ACID TRANSPORTER 2 Y+LAT2 Y+LAT 2	GO:0005575;GO:0022857;GO:0003674;GO:0006810;GO:0055085	cellular_component;transmembrane transporter activity;molecular_function;transport;transmembrane transport
ENSONIG00000012048	nucleosome assembly protein 1 like 1	nap1l1	132.662	179.123	-1.34954	-0.432472	7.31309	10.692	0.00107602	0.0753719	1	protein_coding	ZDB-GENE-030516-2	100698068	I3K217	GO:0006334;GO:0005634;GO:0001878	nucleosome assembly;nucleus;response to yeast	biological_process;cellular_component	PTHR11875_SF34	NUCLEOSOME ASSEMBLY 1	GO:0005575;GO:0043226;GO:0005634;GO:0022607;GO:0065003	cellular_component;organelle;nucleus;cellular component assembly;protein-containing complex assembly
ENSONIG00000015698	NADH:ubiquinone oxidoreductase subunit AB1	ndufab1b	58.713	77.8007	-1.32421	-0.405129	6.18503	10.6886	0.00107796	0.0753719	1	protein_coding	ZDB-GENE-030131-4437	100705793	I3KF61	GO:0006633	fatty acid biosynthetic process	biological_process	PTHR20863_SF5	ACYL CARRIER PROTEIN MITOCHONDRIAL PRECURSOR ACP NADH UBIQUINONE OXIDOREDUCTASE 9.6 KDA SUBUNIT	GO:0009058;GO:0044281;GO:0006629	biosynthetic process;small molecule metabolic process;lipid metabolic process
ENSONIG00000007254	sulfotransferase family 2, cytosolic sulfotransferase 3	sult2st3 (1 of many)	6.4992	2.67678	2.40289	1.26477	2.51094	10.6649	0.00109188	0.0760447	1	protein_coding	ZDB-GENE-061117-4			GO:0008146;GO:0016740	sulfotransferase activity;transferase activity	molecular_function	PTHR11783_SF49	SULFOTRANSFERASE EC_2.8.2.-
ENSONIG00000005218	glycerophosphodiester phosphodiesterase domain-containing protein 5	gdpd5b	106.822	85.2378	1.25333	0.325762	6.59404	10.6373	0.00110831	0.0764133	2	protein_coding	ZDB-GENE-030131-6028	100707261	I3JCG3;I3JCG2	GO:0008889;GO:0006629;GO:0008081;GO:0016020;GO:0016021;GO:0003401;GO:0005886	glycerophosphodiester phosphodiesterase activity;lipid metabolic process;phosphoric diester hydrolase activity;membrane;integral component of membrane;axis elongation;plasma membrane	molecular_function;biological_process;cellular_component	PTHR23344_SF6	GLYCEROPHOSPHODIESTER PHOSPHODIESTERASE DOMAIN CONTAINING 5 EC_3.1.4.11 GLYCEROPHOSPHODIESTER PHOSPHODIESTERASE 2	GO:0006629;GO:0005575;GO:0040007;GO:0005886	lipid metabolic process;cellular_component;growth;plasma membrane
ENSONIG00000010120	methylsterol monooxygenase 1	msmo1	41.0968	53.0411	-1.29014	-0.367524	5.50502	10.6342	0.00111013	0.0764133	2	protein_coding	ZDB-GENE-040426-2670			GO:0005506;GO:0055114;GO:0016491;GO:0008610;GO:0016020;GO:0016021	iron ion binding;oxidation-reduction process;oxidoreductase activity;lipid biosynthetic process;membrane;integral component of membrane	molecular_function;biological_process;cellular_component	PTHR11863_SF22	METHYLSTEROL MONOOXYGENASE EC_1.14.18.9 C 4 METHYLSTEROL OXIDASE	GO:0016491;GO:0003674;GO:0043167;GO:0009058;GO:0006629;GO:0005575	oxidoreductase activity;molecular_function;ion binding;biosynthetic process;lipid metabolic process;cellular_component
ENSONIG00000012603	LIM domain transcription factor LMO4.1	lmo4a	49.793	38.6108	1.28784	0.36495	5.52211	10.6343	0.0011101	0.0764133	1	protein_coding	ZDB-GENE-010702-1	100706721	I3K418	GO:0046872;GO:0030900;GO:0031076	metal ion binding;forebrain development;embryonic camera-type eye development	molecular_function;biological_process	PTHR24208_SF82	LIM DOMAIN TRANSCRIPTION FACTOR LMO4 1 LIM DOMAIN ONLY 4 1 LMO 4 1	GO:0003674;GO:0043167;GO:0048856	molecular_function;ion binding;anatomical structure development
ENSONIG00000007537	major facilitator superfamily domain containing 8	mfsd8	33.4633	25.586	1.3083	0.387696	4.93054	10.5438	0.00116581	0.0772404	1	protein_coding	ZDB-GENE-060818-29			GO:0005215;GO:0055085;GO:0016021;GO:0016020	transporter activity;transmembrane transport;integral component of membrane;membrane	molecular_function;biological_process;cellular_component	PTHR24003_SF41	MAJOR FACILITATOR SUPERFAMILY DOMAIN CONTAINING 8	GO:0005575;GO:0006810;GO:0055085;GO:0003674	cellular_component;transport;transmembrane transport;molecular_function
ENSONIG00000013963	RNA binding motif protein X-linked 2		9.31772	13.6962	-1.46514	-0.55104	3.59562	10.5953	0.00113373	0.0772404	1	protein_coding		100697480	I3K8V4	GO:0003676;GO:0003723	nucleic acid binding;RNA binding	molecular_function	TF657469	UNCHARACTERIZED	GO:0003674;GO:0003723	molecular_function;RNA binding
ENSONIG00000014713	histocompatibility minor 13	hm13	33.3722	42.3151	-1.266	-0.34028	5.2804	10.5601	0.00115555	0.0772404	1	protein_coding	ZDB-GENE-020802-3	100708258	I3KBM7	GO:0004190;GO:0016021;GO:0016020;GO:0006508;GO:0043523	aspartic-type endopeptidase activity;integral component of membrane;membrane;proteolysis;regulation of neuron apoptotic process	molecular_function;cellular_component;biological_process	PTHR12174_SF23	MINOR HISTOCOMPATIBILITY ANTIGEN H13 EC_3.4.23.- PRESENILIN 3 SIGNAL PEPTIDE PEPTIDASE	GO:0005575;GO:0008233	cellular_component;peptidase activity
ENSONIG00000016081	DnaJ heat shock protein family (Hsp40) member B12	dnajb12b	109.487	84.9066	1.28918	0.366458	6.5998	10.562	0.00115434	0.0772404	1	protein_coding	ZDB-GENE-070410-128	100695991	I3KGL3	GO:0016020;GO:0016021	membrane;integral component of membrane	cellular_component	PTHR24077_SF233	DNAJ HOMOLOG SUBFAMILY B MEMBER 12	GO:0005575	cellular_component
ENSONIG00000017697	ring finger protein 44	rnf44	228.309	178.783	1.27626	0.351925	7.6471	10.5464	0.00116415	0.0772404	1	protein_coding	ZDB-GENE-060929-604	100711196	I3KMH1				PTHR14155_SF79	RING FINGER 44
ENSONIG00000017893	zinc finger, DHHC-type containing 15b	zdhhc15b	40.0284	31.7052	1.26302	0.336883	5.2166	10.5746	0.0011465	0.0772404	1	protein_coding	ZDB-GENE-061110-106			GO:0016020;GO:0016021;GO:0016740;GO:0016746;GO:0019706;GO:0008270;GO:0018230;GO:0030900;GO:0045234;GO:0071542;GO:0030173	membrane;integral component of membrane;transferase activity;transferase activity, transferring acyl groups;protein-cysteine S-palmitoyltransferase activity;zinc ion binding;peptidyl-L-cysteine S-palmitoylation;forebrain development;protein palmitoleylation;dopaminergic neuron differentiation;integral component of Golgi membrane	cellular_component;molecular_function;biological_process	PTHR22883_SF6	PALMITOYLTRANSFERASE ZDHHC15 EC_2.3.1.225 ZINC FINGER DHHC DOMAIN CONTAINING 15 DHHC 15	GO:0005575;GO:0016746;GO:0003674;GO:0043167;GO:0006464;GO:0048856;GO:0030154	cellular_component;transferase activity, transferring acyl groups;molecular_function;ion binding;cellular protein modification process;anatomical structure development;cell differentiation
ENSONIG00000019507	calmodulin 2		766.851	1046.89	-1.36504	-0.448945	9.89677	10.5561	0.00115803	0.0772404	1	protein_coding		100707644;100705435;100691629;100690903	I3KTV9	GO:0019722;GO:0005509	calcium-mediated signaling;calcium ion binding	biological_process;molecular_function	PTHR23050_SF155	CALMODULIN	GO:0003674;GO:0043167;GO:0007165	molecular_function;ion binding;signal transduction
ENSONIG00000020215	ribosomal protein L35	rpl35	191.278	350.904	-1.83417	-0.875126	8.28722	10.5728	0.00114761	0.0772404	1	protein_coding	ZDB-GENE-020419-2	100711334	I3KWH2	GO:0005622;GO:0005840;GO:0006412;GO:0003735;GO:0030218;GO:0043009;GO:0051726	intracellular;ribosome;translation;structural constituent of ribosome;erythrocyte differentiation;chordate embryonic development;regulation of cell cycle	cellular_component;biological_process;molecular_function	PTHR13872_SF3	60S RIBOSOMAL L35	GO:0003674;GO:0005198;GO:0003735;GO:0009058;GO:0034641;GO:0006412;GO:0032991;GO:0005575;GO:0043226;GO:0005840;GO:0005622;GO:0002376;GO:0042592;GO:0030154;GO:0048856;GO:0009790	molecular_function;structural molecule activity;structural constituent of ribosome;biosynthetic process;cellular nitrogen compound metabolic process;translation;protein-containing complex;cellular_component;organelle;ribosome;intracellular;immune system process;homeostatic process;cell differentiation;anatomical structure development;embryo development
ENSONIG00000022509			15.5285	24.0353	-1.54982	-0.6321	4.14601	10.603	0.00112902	0.0772404	3	lincRNA
ENSONIG00000023816			3.5179	5.95278	-1.69213	-0.758842	2.29439	10.5562	0.00115801	0.0772404	1	lincRNA
ENSONIG00000020161	CLOCK-interacting pacemaker a	cipca	29.8249	22.5468	1.32291	0.403719	4.71843	10.5335	0.00117229	0.0773797	1	protein_coding	ZDB-GENE-120928-5			GO:0045892;GO:0042754	negative regulation of transcription, DNA-templated;negative regulation of circadian rhythm	biological_process	TF332579	CLOCK INTERACTING PACEMAKER CLOCK INTERACTING CIRCADIAN
ENSONIG00000026982			4.21619	1.82901	2.29841	1.20064	1.66524	10.5152	0.00118394	0.0778586	1	lincRNA
ENSONIG00000003110			36.6705	19.1788	1.91475	0.937154	4.77687	10.4993	0.00119419	0.077953	1	protein_coding				GO:0004540;GO:0003723;GO:0030374;GO:0090501;GO:1903508	ribonuclease activity;RNA binding;nuclear receptor transcription coactivator activity;RNA phosphodiester bond hydrolysis;positive regulation of nucleic acid-templated transcription	molecular_function;biological_process	PTHR10887_SF344	HELICASE WITH ZINC FINGER 2 TRANSCRIPTIONAL COACTIVATOR	GO:0003674;GO:0003723;GO:0004518;GO:0034641	molecular_function;RNA binding;nuclease activity;cellular nitrogen compound metabolic process
ENSONIG00000015838	non-specific cytotoxic cell receptor protein 1	nccrp1	9.60314	15.1248	-1.57368	-0.654143	3.56941	10.5041	0.00119107	0.077953	1	protein_coding	ZDB-GENE-000210-13		I3KFP2				PTHR12125_SF1	F BOX ONLY 50 NCC RECEPTOR 1 NCCRP 1 NON SPECIFIC CYTOTOXIC CELL RECEPTOR 1
ENSONIG00000021392			1.967	4.36242	-2.18692	-1.1289	1.52131	10.472	0.00121199	0.0788238	1	protein_coding				GO:0005515;GO:0005975;GO:0005977	protein binding;carbohydrate metabolic process;glycogen metabolic process	molecular_function;biological_process	PTHR12307_SF7	PHOSPHATASE 1 REGULATORY SUBUNIT 3E	GO:0003674;GO:0005975;GO:0006091	molecular_function;carbohydrate metabolic process;generation of precursor metabolites and energy
ENSONIG00000002576	profilin 2	pfn2	144.4	194.505	-1.34622	-0.428911	7.45317	10.425	0.0012432	0.0792462	2	protein_coding	ZDB-GENE-040115-4	100707933	I3J2Y8;I3J2Y7	GO:0030833;GO:0030036;GO:0003779	regulation of actin filament polymerization;actin cytoskeleton organization;actin binding	biological_process;molecular_function	PTHR13936	PROFILIN PROFILIN	GO:0003674;GO:0008092;GO:0007010	molecular_function;cytoskeletal protein binding;cytoskeleton organization
ENSONIG00000010307	ribosomal protein L15	rpl15	224.603	301.091	-1.34063	-0.42291	8.15168	10.4399	0.0012332	0.0792462	1	protein_coding	ZDB-GENE-040801-183	100697988	I3JVR4	GO:0005622;GO:0005840;GO:0006412;GO:0003735	intracellular;ribosome;translation;structural constituent of ribosome	cellular_component;biological_process;molecular_function	PTHR11847	60S RIBOSOMAL L15	GO:0003674;GO:0005198;GO:0003735;GO:0009058;GO:0034641;GO:0006412;GO:0032991;GO:0005575;GO:0043226;GO:0005840;GO:0005622	molecular_function;structural molecule activity;structural constituent of ribosome;biosynthetic process;cellular nitrogen compound metabolic process;translation;protein-containing complex;cellular_component;organelle;ribosome;intracellular
ENSONIG00000013855			0.791892	0.242449	3.23146	1.69219	-0.494131	10.4218	0.00124536	0.0792462	1	protein_coding
ENSONIG00000016072	bone morphogenetic protein receptor, type IAa	bmpr1aa	4.40674	8.68324	-1.96149	-0.971947	2.62065	10.4427	0.00123137	0.0792462	1	protein_coding	ZDB-GENE-000502-1			GO:0007178;GO:0004675;GO:0006468;GO:0004672;GO:0005524;GO:0016020;GO:0016021;GO:0016740;GO:0000166;GO:0004674;GO:0016301;GO:0016310	transmembrane receptor protein serine/threonine kinase signaling pathway;transmembrane receptor protein serine/threonine kinase activity;protein phosphorylation;protein kinase activity;ATP binding;membrane;integral component of membrane;transferase activity;nucleotide binding;protein serine/threonine kinase activity;kinase activity;phosphorylation	biological_process;molecular_function;cellular_component	PTHR23255_SF50	BONE MORPHOGENETIC RECEPTOR TYPE 1A PRECURSOR BMP TYPE 1A RECEPTOR BMPR 1A EC_2.7.11.30 ACTIVIN RECEPTOR KINASE 3 ALK 3 SERINE/THREONINE KINASE RECEPTOR R5 SKR5 CD292 ANTIGEN	GO:0005575;GO:0003674;GO:0043167;GO:0016301;GO:0006464;GO:0007165	cellular_component;molecular_function;ion binding;kinase activity;cellular protein modification process;signal transduction
ENSONIG00000018638			60.1424	48.7225	1.23305	0.302236	5.79417	10.4268	0.00124199	0.0792462	1	protein_coding				GO:0003676;GO:0003723	nucleic acid binding;RNA binding	molecular_function	PTHR13968_SF16	RNA BINDING RALY	GO:0003674;GO:0003723	molecular_function;RNA binding
ENSONIG00000023958			7.98732	11.7952	-1.47405	-0.559787	3.32503	10.4452	0.0012297	0.0792462	1	lincRNA
ENSONIG00000017312	vacuolar protein sorting 13 homolog D (S. cerevisiae)	vps13d	64.2059	90.4127	-1.40696	-0.49258	6.20874	10.4127	0.0012515	0.0793514	1	protein_coding	ZDB-GENE-050912-1			GO:0005515	protein binding	molecular_function	PTHR16166	VACUOLAR SORTING ASSOCIATED 13	GO:0003674	molecular_function
ENSONIG00000002956	transmembrane protein 165	tmem165	30.3544	23.3834	1.29751	0.375748	4.7875	10.3792	0.00127442	0.0796628	1	protein_coding	ZDB-GENE-030131-3222			GO:0016020;GO:0016021;GO:0001649;GO:0002062;GO:0006487;GO:0048703;GO:0051216;GO:0060536	membrane;integral component of membrane;osteoblast differentiation;chondrocyte differentiation;protein N-linked glycosylation;embryonic viscerocranium morphogenesis;cartilage development;cartilage morphogenesis	cellular_component;biological_process	PTHR12608	TRANSMEMBRANE 165 PRECURSOR TRANSMEMBRANE TPARL	GO:0005575;GO:0030154;GO:0048856;GO:0006464;GO:0009790	cellular_component;cell differentiation;anatomical structure development;cellular protein modification process;embryo development
ENSONIG00000003182	myosin XVAb	myo15ab	3.21167	6.55355	-2.02764	-1.0198	2.01742	10.3823	0.00127232	0.0796628	2	protein_coding	ZDB-GENE-090312-149			GO:0016459;GO:0003774;GO:0005856;GO:0005524;GO:0005515;GO:0000166;GO:0003779	myosin complex;motor activity;cytoskeleton;ATP binding;protein binding;nucleotide binding;actin binding	cellular_component;molecular_function	PTHR13140_SF351	UNCONVENTIONAL MYOSIN XV UNCONVENTIONAL MYOSIN 15	GO:0003674;GO:0043167;GO:0005575;GO:0043226;GO:0005856;GO:0032991;GO:0008092	molecular_function;ion binding;cellular_component;organelle;cytoskeleton;protein-containing complex;cytoskeletal protein binding
ENSONIG00000015902	cytochrome c oxidase subunit 7A2 like	cox7a2l	12.3742	18.3975	-1.47755	-0.563202	4.09526	10.3912	0.00126617	0.0796628	1	protein_coding	ZDB-GENE-030131-7691			GO:0004129;GO:0009055;GO:0005746;GO:0016020;GO:0016021;GO:0022900;GO:1902600	cytochrome-c oxidase activity;electron transfer activity;mitochondrial respirasome;membrane;integral component of membrane;electron transport chain;proton transmembrane transport	molecular_function;cellular_component;biological_process	PTHR10510_SF2	CYTOCHROME C OXIDASE SUBUNIT 7A RELATED PROTEIN MITOCHONDRIAL PRECURSOR CYTOCHROME C OXIDASE SUBUNIT VIIA RELATED	GO:0016491;GO:0022857;GO:0003674;GO:0005575;GO:0006091;GO:0006810;GO:0055085	oxidoreductase activity;transmembrane transporter activity;molecular_function;cellular_component;generation of precursor metabolites and energy;transport;transmembrane transport
ENSONIG00000024232			0.511656	1.59363	-3.13959	-1.65057	0.269585	10.3862	0.0012696	0.0796628	2	lincRNA
ENSONIG00000004248	POZ/BTB and AT hook containing zinc finger 1	patz1	10.5542	14.9144	-1.41015	-0.495847	3.68028	10.3554	0.00129097	0.0798507	2	protein_coding	ZDB-GENE-111223-4	100707364	I3J909;I3J908	GO:0003676;GO:0005515;GO:0016020;GO:0016021	nucleic acid binding;protein binding;membrane;integral component of membrane	molecular_function;cellular_component	PTHR11389_SF320	POZ AT HOOK AND ZINC FINGER CONTAINING 1 BTB/POZ DOMAIN ZINC FINGER TRANSCRIPTION FACTOR KINASE A RI SUBUNIT ALPHA ASSOCIATED ZINC FINGER AND BTB DOMAIN CONTAINING 19 ZINC FINGER 278 ZINC FINGER SARCOMA GENE	GO:0003674;GO:0005575	molecular_function;cellular_component
ENSONIG00000017056	nascent polypeptide associated complex subunit alpha	naca	394.412	529.613	-1.34267	-0.425102	8.93445	10.3621	0.00128628	0.0798507	1	protein_coding	ZDB-GENE-020423-4			GO:0005854;GO:0030239;GO:0060216;GO:0005634;GO:0005737	nascent polypeptide-associated complex;myofibril assembly;definitive hemopoiesis;nucleus;cytoplasm	cellular_component;biological_process	PTHR21713_SF3	NASCENT POLYPEPTIDE ASSOCIATED COMPLEX SUBUNIT ALPHA NAC ALPHA ALPHA NAC	GO:0032991;GO:0005575;GO:0007010;GO:0022607;GO:0048856;GO:0048646;GO:0043226;GO:0005634;GO:0005737	protein-containing complex;cellular_component;cytoskeleton organization;cellular component assembly;anatomical structure development;anatomical structure formation involved in morphogenesis;organelle;nucleus;cytoplasm
ENSONIG00000018688	androgen-induced gene 1 protein	pex3	68.1316	54.7085	1.24447	0.315536	5.99375	10.3602	0.00128762	0.0798507	1	protein_coding	ZDB-GENE-040426-979	100703533	I3KQY0	GO:0007031;GO:0005779	peroxisome organization;integral component of peroxisomal membrane	biological_process;cellular_component	TF628365	PEROXISOMAL BIOGENESIS FACTOR	GO:0005575	cellular_component
ENSONIG00000009189	signal transducing adaptor molecule (SH3 domain and ITAM motif) 1	stam	348.814	281.145	1.24049	0.310911	8.25601	10.3446	0.00129853	0.0798767	2	protein_coding	ZDB-GENE-031118-123			GO:0006886;GO:0005515;GO:0005623	intracellular protein transport;protein binding;cell	biological_process;molecular_function;cellular_component	PTHR13856_SF26	SIGNAL TRANSDUCING ADAPTER MOLECULE 1 STAM 1	GO:0003674;GO:0006810;GO:0005575;GO:0005623	molecular_function;transport;cellular_component;cell
ENSONIG00000019471	ketohexokinase	khk	31.1272	43.0101	-1.383	-0.467799	5.17448	10.3419	0.00130042	0.0798767	2	protein_coding	ZDB-GENE-040718-381	100700794	I3KTR5;I3KTR6	GO:0016773;GO:0006000;GO:0004454;GO:0046835	phosphotransferase activity, alcohol group as acceptor;fructose metabolic process;ketohexokinase activity;carbohydrate phosphorylation	molecular_function;biological_process	PTHR10584_SF177	KETOHEXOKINASE EC_2.7.1.3 HEPATIC FRUCTOKINASE	GO:0044281;GO:0005975;GO:0016301	small molecule metabolic process;carbohydrate metabolic process;kinase activity	00051+2.7.1.3
ENSONIG00000002326	ribosomal protein S2	rps2	314.425	416.274	-1.32392	-0.404811	8.6113	10.2879	0.00133908	0.0819667	1	protein_coding	ZDB-GENE-040426-2454	100693457	I3J219	GO:0015935;GO:0003723;GO:0005840;GO:0006412;GO:0003735;GO:1990904	small ribosomal subunit;RNA binding;ribosome;translation;structural constituent of ribosome;ribonucleoprotein complex	cellular_component;molecular_function;biological_process	PTHR13718_SF4	40S RIBOSOMAL S2	GO:0003674;GO:0005198;GO:0003735;GO:0009058;GO:0034641;GO:0006412;GO:0032991;GO:0005575;GO:0043226;GO:0005840;GO:0003723	molecular_function;structural molecule activity;structural constituent of ribosome;biosynthetic process;cellular nitrogen compound metabolic process;translation;protein-containing complex;cellular_component;organelle;ribosome;RNA binding
ENSONIG00000017758			436.02	577.566	-1.32453	-0.405483	9.04301	10.268	0.00135356	0.0825675	1	protein_coding				GO:0006414;GO:0003746;GO:0003924;GO:0005525;GO:0000166	translational elongation;translation elongation factor activity;GTPase activity;GTP binding;nucleotide binding	biological_process;molecular_function	PTHR23115_SF104	ELONGATION FACTOR 1 ALPHA 1 EF 1 ALPHA 1 ELONGATION FACTOR TU EF TU EUKARYOTIC ELONGATION FACTOR 1 A 1 EEF1A 1	GO:0003674;GO:0043167;GO:0003924;GO:0003723;GO:0009058;GO:0008135	molecular_function;ion binding;GTPase activity;RNA binding;biosynthetic process;translation factor activity, RNA binding
ENSONIG00000002814	ribosomal protein lateral stalk subunit P1	rplp1	221.234	365.599	-1.65226	-0.724441	8.37095	10.2323	0.00138	0.0830636	1	protein_coding	ZDB-GENE-030131-8663	100692069	I3J3T8	GO:0006414;GO:0005622;GO:0005840;GO:0003735;GO:0030218	translational elongation;intracellular;ribosome;structural constituent of ribosome;erythrocyte differentiation	biological_process;cellular_component;molecular_function	PTHR21141_SF30	60S ACIDIC RIBOSOMAL P1	GO:0003674;GO:0005198;GO:0003735;GO:0032991;GO:0005575;GO:0043226;GO:0005840;GO:0005622;GO:0009058;GO:0002376;GO:0042592;GO:0030154	molecular_function;structural molecule activity;structural constituent of ribosome;protein-containing complex;cellular_component;organelle;ribosome;intracellular;biosynthetic process;immune system process;homeostatic process;cell differentiation
ENSONIG00000003186	transmembrane and coiled-coil domains 3	tmco3	60.9639	46.434	1.31213	0.39191	5.69852	10.2354	0.00137768	0.0830636	2	protein_coding	ZDB-GENE-071030-1	100691360	I3J556;I3J555	GO:0015299;GO:0006812;GO:0055085;GO:0016021;GO:0016020;GO:1902600	solute:proton antiporter activity;cation transport;transmembrane transport;integral component of membrane;membrane;proton transmembrane transport	molecular_function;biological_process;cellular_component	PTHR16254_SF14	TRANSMEMBRANE AND COILED COIL DOMAIN CONTAINING 3 PRECURSOR	GO:0005575;GO:0006810;GO:0055085;GO:0022857;GO:0003674	cellular_component;transport;transmembrane transport;transmembrane transporter activity;molecular_function
ENSONIG00000016910	lysosome membrane protein 2	scarb2a	19.5121	28.2876	-1.44808	-0.534137	4.5351	10.2305	0.0013814	0.0830636	1	protein_coding	ZDB-GENE-020419-29	100709098	I3KJM8	GO:0005044;GO:0016020;GO:0005764;GO:0016021;GO:0006898	scavenger receptor activity;membrane;lysosome;integral component of membrane;receptor-mediated endocytosis	molecular_function;cellular_component;biological_process	PTHR11923	SENSORY NEURON MEMBRANE 1	GO:0005575;GO:0003674;GO:0005773;GO:0043226;GO:0005764;GO:0006810;GO:0016192	cellular_component;molecular_function;vacuole;organelle;lysosome;transport;vesicle-mediated transport
ENSONIG00000023353			5.9941	9.41239	-1.56337	-0.644658	2.94115	10.2254	0.00138518	0.0830636	1	lincRNA
ENSONIG00000026129			1.57621	4.18339	-2.63218	-1.39626	1.51484	10.2478	0.00136848	0.0830636	1	lincRNA
ENSONIG00000009689	desmoglein-2		24.3817	16.3549	1.48534	0.570793	4.37287	10.2069	0.00139913	0.0835179	2	protein_coding		102081358	I3JTH4;I3JTH5	GO:0007155;GO:0007156;GO:0005886;GO:0005509;GO:0016020;GO:0016021	cell adhesion;homophilic cell adhesion via plasma membrane adhesion molecules;plasma membrane;calcium ion binding;membrane;integral component of membrane	biological_process;cellular_component;molecular_function	PTHR24025	PRECURSOR	GO:0005575;GO:0003674;GO:0043167;GO:0005886;GO:0007155	cellular_component;molecular_function;ion binding;plasma membrane;cell adhesion
ENSONIG00000020491			1.99237	0.327419	6.10924	2.61099	0.263799	10.2029	0.00140219	0.0835179	1	protein_coding							PTHR31025	UNCHARACTERIZED
ENSONIG00000016893	post-GPI attachment to proteins factor 2	PGAP2 (1 of many)	103.027	80.3326	1.28205	0.358449	6.54187	10.152	0.00144147	0.0855692	1	protein_coding		100712494	I3KJK5	GO:0000139;GO:0016020;GO:0016021	Golgi membrane;membrane;integral component of membrane	cellular_component	PTHR12892	POST GPI ATTACHMENT TO PROTEINS FACTOR 2	GO:0005575	cellular_component
ENSONIG00000017603	fibroblast growth factor 20-like	fgf20b	0.286274	1.02055	-3.40954	-1.76958	-0.273921	10.1444	0.00144737	0.085632	1	protein_coding		100711879	H2E8V7	GO:0005576;GO:0008543;GO:0005104;GO:0008083;GO:0010469;GO:0048703	extracellular region;fibroblast growth factor receptor signaling pathway;fibroblast growth factor receptor binding;growth factor activity;regulation of signaling receptor activity;embryonic viscerocranium morphogenesis	cellular_component;biological_process;molecular_function	PTHR11486_SF72	FIBROBLAST GROWTH FACTOR 20 FGF 20	GO:0003674;GO:0007165;GO:0005575;GO:0005576;GO:0008150;GO:0048856;GO:0009790	molecular_function;signal transduction;cellular_component;extracellular region;biological_process;anatomical structure development;embryo development
ENSONIG00000009675	transmembrane protein 14A	zgc:163080	23.7429	33.7403	-1.41692	-0.502757	4.98706	10.1333	0.00145615	0.0858641	1	protein_coding	ZDB-GENE-070410-137	100706629	I3JTF8	GO:0016020;GO:0016021	membrane;integral component of membrane	cellular_component	PTHR12668_SF11	TRANSMEMBRANE 14A	GO:0005575	cellular_component
ENSONIG00000020174	iron-sulfur cluster assembly 2	isca2	5.12184	8.65426	-1.67898	-0.747588	2.75988	10.1208	0.00146605	0.0861606	1	protein_coding	ZDB-GENE-131121-486	100705964	I3KWC1	GO:0051536;GO:0005198;GO:0097428	iron-sulfur cluster binding;structural molecule activity;protein maturation by iron-sulfur cluster transfer	molecular_function;biological_process	PTHR10072_SF26	IRON SULFUR CLUSTER ASSEMBLY 2 HOMOLOG MITOCHONDRIAL PRECURSOR HESB DOMAIN CONTAINING 1	GO:0003674;GO:0005198;GO:0051604	molecular_function;structural molecule activity;protein maturation
ENSONIG00000002752	lysine (K)-specific methyltransferase 2Bb	kmt2bb	24.636	32.8277	-1.32972	-0.411124	4.81141	10.0986	0.00148384	0.0869174	2	protein_coding	ZDB-GENE-080521-1			GO:0008270;GO:0005634;GO:0003677;GO:0005515;GO:0016740;GO:0046872;GO:0008168;GO:0032259;GO:0018024;GO:0034968	zinc ion binding;nucleus;DNA binding;protein binding;transferase activity;metal ion binding;methyltransferase activity;methylation;histone-lysine N-methyltransferase activity;histone lysine methylation	molecular_function;cellular_component;biological_process	PTHR22884_SF318	HISTONE LYSINE N METHYLTRANSFERASE TRITHORAX EC_2.1.1.43	GO:0003674;GO:0003677;GO:0005575;GO:0043226;GO:0005634;GO:0043167;GO:0008168;GO:0006464	molecular_function;DNA binding;cellular_component;organelle;nucleus;ion binding;methyltransferase activity;cellular protein modification process	00310+2.1.1.43
ENSONIG00000006400	regulation of nuclear pre-mRNA domain containing 2b	rprd2b	25.0531	34.713	-1.38072	-0.465419	4.89083	10.0842	0.00149545	0.0873087	1	protein_coding	ZDB-GENE-110719-1						PTHR12460	REGULATION OF NUCLEAR PRE DOMAIN CONTAINING 1A CYCLIN DEPENDENT KINASE INHIBITOR 2B RELATED P15INK4B RELATED
ENSONIG00000021138			3.65719	1.6129	2.27736	1.18737	1.53085	10.0697	0.00150726	0.0877087	1	protein_coding				GO:0008270;GO:0005515;GO:0046872	zinc ion binding;protein binding;metal ion binding	molecular_function	PTHR25462_SF201	TRIM	GO:0003674;GO:0043167	molecular_function;ion binding
ENSONIG00000003225	vacuolar protein sorting 13 homolog C		79.4107	107.731	-1.35543	-0.438755	6.48355	10.0605	0.00151478	0.0878573	2	protein_coding		100707950	I3J5B0;I3J5A9				PTHR16166	VACUOLAR SORTING ASSOCIATED 13
ENSONIG00000004155	spermidine/spermine N1-acetyltransferase family member 2b	sat2b	23.9064	16.2869	1.46415	0.550059	4.43739	9.9713	0.00158999	0.0916188	1	protein_coding	ZDB-GENE-040718-292						PTHR10545	DIAMINE ACETYLTRANSFERASE 1 EC_2.3.1.57 POLYAMINE N ACETYLTRANSFERASE 1 PUTRESCINE ACETYLTRANSFERASE SPERMIDINE/SPERMINE N 1 ACETYLTRANSFERASE 1 SSAT SSAT 1			00330+2.3.1.57
ENSONIG00000017848	NADH:ubiquinone oxidoreductase subunit A12	ndufa12	35.499	52.3839	-1.47402	-0.559757	5.57505	9.97243	0.00158901	0.0916188	1	protein_coding	ZDB-GENE-050828-1	100704883	I3KN05	GO:0009055;GO:0016020;GO:0008137;GO:0055114;GO:0005739;GO:0005743;GO:0022900;GO:0070469	electron transfer activity;membrane;NADH dehydrogenase (ubiquinone) activity;oxidation-reduction process;mitochondrion;mitochondrial inner membrane;electron transport chain;respirasome	molecular_function;cellular_component;biological_process	PTHR12910_SF2	NADH DEHYDROGENASE [UBIQUINONE] 1 ALPHA SUBCOMPLEX SUBUNIT 12 COMPLEX I B17 2 CI B17 2 CIB17 2 NADH UBIQUINONE OXIDOREDUCTASE SUBUNIT B17 2	GO:0005575;GO:0016491;GO:0043226;GO:0005739;GO:0006091	cellular_component;oxidoreductase activity;organelle;mitochondrion;generation of precursor metabolites and energy
ENSONIG00000008480	thyrotrophic embryonic factor b	tefb	68.8433	94.3995	-1.37151	-0.455766	6.33759	9.93796	0.00161905	0.0929904	1	protein_coding	ZDB-GENE-050522-224			GO:0006357;GO:0003700;GO:0006355;GO:0071482	regulation of transcription by RNA polymerase II;DNA-binding transcription factor activity;regulation of transcription, DNA-templated;cellular response to light stimulus	biological_process;molecular_function	PTHR11988_SF24	THYROTROPH EMBRYONIC FACTOR	GO:0003674;GO:0003700	molecular_function;DNA-binding transcription factor activity
ENSONIG00000002558	lysosomal-associated membrane protein 2	lamp2	249.931	310.347	-1.24132	-0.311875	8.14994	9.92489	0.00163059	0.0930488	2	protein_coding	ZDB-GENE-030729-9			GO:0016020;GO:0016021;GO:0005764;GO:0005765	membrane;integral component of membrane;lysosome;lysosomal membrane	cellular_component	PTHR11506	LYSOSOME ASSOCIATED MEMBRANE GLYCOPROTEIN PRECURSOR LAMP LYSOSOME ASSOCIATED MEMBRANE CD107 ANTIGEN FAMILY MEMBER ANTIGEN	GO:0005575;GO:0005773;GO:0043226;GO:0005764	cellular_component;vacuole;organelle;lysosome
ENSONIG00000006986	huntingtin interacting protein K	hypk	8.92299	14.7794	-1.64779	-0.720531	3.72682	9.92929	0.00162669	0.0930488	1	protein_coding	ZDB-GENE-080515-6						PTHR31184	HUNTINGTIN INTERACTING K HUNTINGTIN YEAST PARTNER K
ENSONIG00000006460	retinol-binding protein 1		6.71635	10.7148	-1.59013	-0.669145	3.19711	9.90502	0.00164828	0.0937561	1	protein_coding		100709185	I3JH03	GO:0008289	lipid binding	molecular_function	PTHR11955_SF63	RETINOL BINDING 1	GO:0003674;GO:0008289	molecular_function;lipid binding
ENSONIG00000025528			69.2372	55.9036	1.23943	0.309678	5.98106	9.86965	0.00168027	0.0952693	1	lincRNA
ENSONIG00000004497	L-amino-acid oxidase-like		1.33343	0.0628221	18.4041	4.20195	-0.786416	9.86325	0.00168613	0.0952958	1	protein_coding		100707943	I3J9X4	GO:0055114;GO:0016491	oxidation-reduction process;oxidoreductase activity	biological_process;molecular_function	PTHR10742_SF235	L AMINO ACID OXIDASE PRECURSOR LAAO LAO EC_1.4.3.2	GO:0016491	oxidoreductase activity
ENSONIG00000003885	centrosomal protein 41	cep41	54.0419	41.8766	1.29146	0.369005	5.57239	9.82573	0.00172087	0.0969497	2	protein_coding	ZDB-GENE-040704-35	100696728	I3J7Q5;I3J7Q4	GO:0070740;GO:0018095;GO:0035082;GO:0060271	tubulin-glutamic acid ligase activity;protein polyglutamylation;axoneme assembly;cilium assembly	molecular_function;biological_process	PTHR13253_SF53	CENTROSOMAL OF 41 KDA CEP41 TESTIS SPECIFIC GENE A14	GO:0016874;GO:0006464;GO:0007010;GO:0022607	ligase activity;cellular protein modification process;cytoskeleton organization;cellular component assembly
ENSONIG00000001390	heparan sulfate glucosamine 3-O-sulfotransferase 2	hs3st2	32.7853	24.1899	1.35676	0.44017	4.8829	9.79253	0.00175222	0.0977816	2	protein_coding	ZDB-GENE-070202-7	100699275	I3IYR3;I3IYR4	GO:0008146;GO:0016020;GO:0016021;GO:0016740	sulfotransferase activity;membrane;integral component of membrane;transferase activity	molecular_function;cellular_component	PTHR10605_SF10	HEPARAN SULFATE GLUCOSAMINE 3 O SULFOTRANSFERASE 2 EC_2.8.2.29 HEPARAN SULFATE D GLUCOSAMINYL 3 O SULFOTRANSFERASE 2 HEPARAN SULFATE 3 O SULFOTRANSFERASE 2	GO:0005575	cellular_component
ENSONIG00000006166	sodium channel, voltage-gated, type III, beta	scn3b	89.5073	70.9198	1.2621	0.335822	6.32005	9.79331	0.00175148	0.0977816	1	protein_coding	ZDB-GENE-070920-2			GO:0001518;GO:0017080;GO:0006814;GO:0016020;GO:0016021	voltage-gated sodium channel complex;sodium channel regulator activity;sodium ion transport;membrane;integral component of membrane	cellular_component;molecular_function;biological_process	PTHR10546	SODIUM CHANNEL SUBUNIT BETA PRECURSOR	GO:0006810;GO:0003674;GO:0032991;GO:0005575	transport;molecular_function;protein-containing complex;cellular_component
ENSONIG00000012274	putative helicase mov-10-B.2	mov10b.2	10.2057	3.39362	3.01125	1.59036	2.85024	9.79931	0.00174577	0.0977816	2	protein_coding	ZDB-GENE-060526-371	100711843	I3K2W3;I3K2W4	GO:0003723;GO:0032575;GO:0035194	RNA binding;ATP-dependent 5'-3' RNA helicase activity;posttranscriptional gene silencing by RNA	molecular_function;biological_process	PTHR10887_SF326	HELICASE MOV 10 EC_3.6.4.13	GO:0003674;GO:0003723;GO:0016887;GO:0004386	molecular_function;RNA binding;ATPase activity;helicase activity
ENSONIG00000002168	ribosomal modification protein rimK-like family member A	rimkla	113.165	89.6489	1.2627	0.33651	6.63339	9.77307	0.00177087	0.0985114	1	protein_coding	ZDB-GENE-040912-20			GO:0006464;GO:0005524;GO:0046872;GO:0000166	cellular protein modification process;ATP binding;metal ion binding;nucleotide binding	biological_process;molecular_function	PTHR21621	BETA CITRYLGLUTAMATE SYNTHASE B EC_6.3.1.17 N ACETYL ASPARTYLGLUTAMATE SYNTHETASE B NAAG SYNTHETASE B NAAGS EC_6.3.2.- 41 RIBOSOMAL S6 MODIFICATION B	GO:0003674;GO:0043167;GO:0006464	molecular_function;ion binding;cellular protein modification process
ENSONIG00000004468	dedicator of cytokinesis 3	dock3	90.8649	125.69	-1.38204	-0.466802	6.67628	9.76028	0.00178323	0.0988883	1	protein_coding	ZDB-GENE-100624-1			GO:0005085;GO:0007264;GO:0005515	guanyl-nucleotide exchange factor activity;small GTPase mediated signal transduction;protein binding	molecular_function;biological_process	PTHR23317_SF66	DEDICATOR OF CYTOKINESIS 3 MODIFIER OF CELL ADHESION PRESENILIN BINDING PBP	GO:0003674;GO:0007165	molecular_function;signal transduction
ENSONIG00000017186	zinc finger DHHC-type containing 7	zdhhc7	14.9206	10.3979	1.42988	0.515891	3.68288	9.70845	0.00183423	0.101399	1	protein_coding	ZDB-GENE-040718-346	100693376	I3KKM9	GO:0016020;GO:0016021;GO:0016740;GO:0016746;GO:0019706	membrane;integral component of membrane;transferase activity;transferase activity, transferring acyl groups;protein-cysteine S-palmitoyltransferase activity	cellular_component;molecular_function	PTHR22883_SF49	PALMITOYLTRANSFERASE ZDHHC7 EC_2.3.1.225 ZINC FINGER DHHC DOMAIN CONTAINING 7	GO:0005575;GO:0016746	cellular_component;transferase activity, transferring acyl groups
ENSONIG00000010070			1472.4	1213.4	1.21339	0.279049	10.4097	9.67474	0.00186819	0.102842	2	protein_coding				GO:0004843;GO:0005622;GO:0006511;GO:0005515;GO:0016874;GO:0016787;GO:0016579;GO:0008233;GO:0008234;GO:0006508;GO:0036459	thiol-dependent ubiquitin-specific protease activity;intracellular;ubiquitin-dependent protein catabolic process;protein binding;ligase activity;hydrolase activity;protein deubiquitination;peptidase activity;cysteine-type peptidase activity;proteolysis;thiol-dependent ubiquitinyl hydrolase activity	molecular_function;cellular_component;biological_process	PTHR15551;PTHR10589_SF19	LIM AND CALPONIN HOMOLOGY DOMAINS CONTAINING 1;UBIQUITIN CARBOXYL TERMINAL HYDROLASE ISOZYME L1 PRECURSOR UCH L1 EC_3.4.19.12 EC 6 NEURON CYTOPLASMIC 9 5 PGP 9 5 PGP9 5 UBIQUITIN THIOESTERASE L1	GO:0003674;GO:0009056;GO:0005575;GO:0005622;GO:0006464;GO:0016874;GO:0008233	molecular_function;catabolic process;cellular_component;intracellular;cellular protein modification process;ligase activity;peptidase activity
ENSONIG00000021455	tripartite motif-containing protein 16-like		1.30587	0.506169	2.57299	1.36345	-0.0195063	9.67103	0.00187196	0.102842	1	protein_coding		109203634;109194468		GO:0008270;GO:0005515;GO:0046872	zinc ion binding;protein binding;metal ion binding	molecular_function	PTHR25462_SF201	TRIM	GO:0003674;GO:0043167	molecular_function;ion binding
ENSONIG00000003924	G2 and S-phase expressed 1		0.960223	0.184377	5.03866	2.33304	-0.260714	9.644	0.00189971	0.10339	4	protein_coding		100698065	I3J7V3;I3J7V6;I3J7V4;I3J7V5				PTHR21584	PROLINE/SERINE RICH COILED COIL 1
ENSONIG00000004138	40S ribosomal protein S17	zgc:114188	219.545	311.259	-1.41752	-0.503373	8.20397	9.63906	0.00190483	0.10339	1	protein_coding	ZDB-GENE-050320-15	100691912	I3J8M4	GO:0005622;GO:0005840;GO:0006412;GO:0003735	intracellular;ribosome;translation;structural constituent of ribosome	cellular_component;biological_process;molecular_function	PTHR10732	40S RIBOSOMAL S17	GO:0003674;GO:0005198;GO:0003735;GO:0009058;GO:0034641;GO:0006412;GO:0032991;GO:0005575;GO:0043226;GO:0005840;GO:0005622	molecular_function;structural molecule activity;structural constituent of ribosome;biosynthetic process;cellular nitrogen compound metabolic process;translation;protein-containing complex;cellular_component;organelle;ribosome;intracellular
ENSONIG00000007087	C-myc promoter-binding protein	DENND4A	39.8672	56.0615	-1.40413	-0.489674	5.52036	9.62936	0.00191491	0.10339	2	protein_coding		100702482	I3JJA0;I3JJ99	GO:0005515	protein binding	molecular_function	PTHR12296_SF16	C MYC PROMOTER BINDING DENN DOMAIN CONTAINING 4A	GO:0003674	molecular_function
ENSONIG00000007097	cullin 7	CUL7	33.6464	44.3825	-1.31531	-0.395404	5.26316	9.62916	0.00191512	0.10339	1	protein_coding			I3JJB0	GO:0006511;GO:0031625	ubiquitin-dependent protein catabolic process;ubiquitin protein ligase binding	biological_process;molecular_function	PTHR22771	CULLIN CUL	GO:0009056;GO:0003674;GO:0019899	catabolic process;molecular_function;enzyme binding
ENSONIG00000012945	syntaxin binding protein 1	stxbp1a	213.564	278.1	-1.30159	-0.380279	7.93192	9.62734	0.00191702	0.10339	2	protein_coding	ZDB-GENE-050626-106	100710030	I3K589;I3K588	GO:0006904;GO:0016192	vesicle docking involved in exocytosis;vesicle-mediated transport	biological_process	PTHR11679_SF35	SYNTAXIN BINDING 1 N SEC1 UNC 18 HOMOLOG 1 UNC18 1 UNC 18 HOMOLOG A UNC 18A	GO:0006810;GO:0016192	transport;vesicle-mediated transport
ENSONIG00000025355			1.70793	3.43814	-1.98191	-0.986892	1.27842	9.65051	0.00189299	0.10339	1	lincRNA
ENSONIG00000026519			3.89767	7.73604	-1.96718	-0.976128	2.2671	9.61663	0.00192823	0.103679	1	lincRNA
ENSONIG00000001602			0.952508	0.207243	4.44863	2.15336	-0.219095	9.57803	0.0019692	0.104925	1	protein_coding				GO:0098609;GO:0016020	cell-cell adhesion;membrane	biological_process;cellular_component	PTHR13771_SF9	INTERCELLULAR ADHESION MOLECULE 3 PRECURSOR ICAM 3 CD50 ANTIGEN	GO:0005575;GO:0007155	cellular_component;cell adhesion
ENSONIG00000006845	dpy-30 histone methyltransferase complex regulatory subunit	dpy30	6.94996	12.7775	-1.8306	-0.872313	3.46429	9.5798	0.0019673	0.104925	1	protein_coding	ZDB-GENE-040718-136			GO:0048188;GO:0044666;GO:0035162	Set1C/COMPASS complex;MLL3/4 complex;embryonic hemopoiesis	cellular_component;biological_process	TF627358	DPY 30 HOMOLOG DPY 30 DPY 30L	GO:0032991;GO:0005575;GO:0048856	protein-containing complex;cellular_component;anatomical structure development
ENSONIG00000017925	GATA binding protein 3	gata3	10.4822	16.5778	-1.57762	-0.657748	3.76188	9.58146	0.00196552	0.104925	1	protein_coding	ZDB-GENE-990415-82	100706217	I3KN97	GO:0000976;GO:0008270;GO:0043565;GO:0003700;GO:0005634;GO:0006355;GO:0045582;GO:0046872;GO:0008284;GO:0008543;GO:0021514;GO:0031101;GO:0042246;GO:0043049;GO:0048702;GO:0050769;GO:0060788;GO:0061026;GO:0071696;GO:2001224	transcription regulatory region sequence-specific DNA binding;zinc ion binding;sequence-specific DNA binding;DNA-binding transcription factor activity;nucleus;regulation of transcription, DNA-templated;positive regulation of T cell differentiation;metal ion binding;positive regulation of cell population proliferation;fibroblast growth factor receptor signaling pathway;ventral spinal cord interneu…	molecular_function;cellular_component;biological_process	PTHR10071_SF106	TRANS ACTING T CELL SPECIFIC TRANSCRIPTION FACTOR GATA 3 GATA BINDING FACTOR 3	GO:0005575;GO:0043226;GO:0005634;GO:0003674;GO:0003700;GO:0003677;GO:0043167;GO:0007165;GO:0048856;GO:0030154;GO:0040007;GO:0048646;GO:0009790	cellular_component;organelle;nucleus;molecular_function;DNA-binding transcription factor activity;DNA binding;ion binding;signal transduction;anatomical structure development;cell differentiation;growth;anatomical structure formation involved in morphogenesis;embryo development
ENSONIG00000001283	eukaryotic translation initiation factor 3 subunit K	eif3k	15.1868	22.8752	-1.50109	-0.586006	4.36958	9.56818	0.00197979	0.105172	1	protein_coding	ZDB-GENE-050417-45	100697615	I3IYD0	GO:0006446;GO:0043022;GO:0005737;GO:0005852;GO:0003743;GO:0005634;GO:0001732;GO:0002183;GO:0006412;GO:0006413;GO:0016282;GO:0033290;GO:0003723	regulation of translational initiation;ribosome binding;cytoplasm;eukaryotic translation initiation factor 3 complex;translation initiation factor activity;nucleus;formation of cytoplasmic translation initiation complex;cytoplasmic translational initiation;translation;translational initiation;eukaryotic 43S preinitiation complex;eukaryotic 48S preinitiation complex;RNA binding	biological_process;molecular_function;cellular_component	PTHR13022	EUKARYOTIC TRANSLATION INITIATION FACTOR 3 SUBUNIT K EIF3K EIF 3 P25	GO:0003674;GO:0003723;GO:0008135;GO:0005575;GO:0005737;GO:0032991;GO:0043226;GO:0005634;GO:0022607;GO:0022618;GO:0065003;GO:0009058;GO:0034641;GO:0006412	molecular_function;RNA binding;translation factor activity, RNA binding;cellular_component;cytoplasm;protein-containing complex;organelle;nucleus;cellular component assembly;ribonucleoprotein complex assembly;protein-containing complex assembly;biosynthetic process;cellular nitrogen compound metabolic process;translation
ENSONIG00000009651	adenosine kinase	adka	84.536	67.9531	1.24391	0.314886	6.26231	9.55901	0.00198971	0.105383	2	protein_coding	ZDB-GENE-030425-3	100693415	I3JTD0;I3JTD1	GO:0016773;GO:0006166;GO:0004001;GO:0006167	phosphotransferase activity, alcohol group as acceptor;purine ribonucleoside salvage;adenosine kinase activity;AMP biosynthetic process	molecular_function;biological_process	PTHR10584_SF24	ADENOSINE KINASE AK EC_2.7.1.20 ADENOSINE 5' PHOSPHOTRANSFERASE	GO:0009058;GO:0044281;GO:0034641;GO:0016301	biosynthetic process;small molecule metabolic process;cellular nitrogen compound metabolic process;kinase activity	00230+2.7.1.20
ENSONIG00000002145	si:dkey-117i10.1	si:dkey-117i10.1	7.84969	0.372575	20.7114	4.37235	2.32809	9.53526	0.00201562	0.106246	1	protein_coding	ZDB-GENE-091204-371			GO:0005834;GO:0003924;GO:0007186;GO:0016020;GO:0007165;GO:0005886	heterotrimeric G-protein complex;GTPase activity;G protein-coupled receptor signaling pathway;membrane;signal transduction;plasma membrane	cellular_component;molecular_function;biological_process	PTHR13809	GUANINE NUCLEOTIDE BINDING SUBUNIT GAMMA	GO:0007165;GO:0003924;GO:0032991;GO:0005575;GO:0005886	signal transduction;GTPase activity;protein-containing complex;cellular_component;plasma membrane
ENSONIG00000004996	VPS53, GARP complex subunit	vps53	60.3028	48.1218	1.25403	0.326577	5.71117	9.51838	0.00203424	0.106246	1	protein_coding	ZDB-GENE-041114-199	100703960	I3JBP4	GO:0042147;GO:0000938;GO:0005829	retrograde transport, endosome to Golgi;GARP complex;cytosol	biological_process;cellular_component	PTHR12820	VACUOLAR SORTING ASSOCIATED 53	GO:0006810;GO:0016192;GO:0032991;GO:0005575;GO:0005829	transport;vesicle-mediated transport;protein-containing complex;cellular_component;cytosol
ENSONIG00000009251	calcium/calmodulin-dependent 3',5'-cyclic nucleotide phosphodiesterase 1C		185.684	150.08	1.23684	0.306659	7.37715	9.53178	0.00201944	0.106246	1	protein_coding		100712431	I3JRY9	GO:0008081;GO:0004114;GO:0007165;GO:0016787;GO:0046872	phosphoric diester hydrolase activity;3',5'-cyclic-nucleotide phosphodiesterase activity;signal transduction;hydrolase activity;metal ion binding	molecular_function;biological_process	PTHR11347_SF32	CALCIUM/CALMODULIN DEPENDENT 3' 5' CYCLIC NUCLEOTIDE PHOSPHODIESTERASE 1C CAM PDE 1C 3' 5' CYCLIC AMP PHOSPHODIESTERASE EC_3.1.4.- 3' 5' CYCLIC GMP PHOSPHODIESTERASE EC_3.1.4.35	GO:0007165;GO:0003674;GO:0043167	signal transduction;molecular_function;ion binding	00230+3.1.4.17
ENSONIG00000019045	ATP binding cassette subfamily A member 5	ABCA5	33.9227	45.9194	-1.35083	-0.433844	5.30657	9.51677	0.00203603	0.106246	2	protein_coding			I3KS81;I3KS82	GO:0042626;GO:0016887;GO:0055085;GO:0016021;GO:0005524;GO:0030301;GO:0016020;GO:0000166	ATPase activity, coupled to transmembrane movement of substances;ATPase activity;transmembrane transport;integral component of membrane;ATP binding;cholesterol transport;membrane;nucleotide binding	molecular_function;biological_process;cellular_component	PTHR19229_SF100	ATP BINDING CASSETTE SUB FAMILY A MEMBER 5	GO:0003674;GO:0043167;GO:0005575;GO:0006810;GO:0055085;GO:0016887;GO:0022857	molecular_function;ion binding;cellular_component;transport;transmembrane transport;ATPase activity;transmembrane transporter activity
ENSONIG00000019934	cytochrome c oxidase subunit 6B1	cox6b1	59.2345	86.2292	-1.454	-0.540027	6.27993	9.52248	0.0020297	0.106246	1	protein_coding	ZDB-GENE-040718-448	100692674	I3KVG2	GO:0005739	mitochondrion	cellular_component	PTHR11387_SF14	CYTOCHROME C OXIDASE SUBUNIT	GO:0005575;GO:0043226;GO:0005739	cellular_component;organelle;mitochondrion
ENSONIG00000021966			2.17488	3.91604	-1.7851	-0.836003	1.74801	9.47234	0.00208593	0.10853	1	miRNA
ENSONIG00000003714	ADAM metallopeptidase domain 17a	adam17a	347.553	277.786	1.25101	0.323097	8.28403	9.46176	0.002098	0.108837	2	protein_coding	ZDB-GENE-030131-2862			GO:0004222;GO:0008237;GO:0006508;GO:0016020;GO:0016021	metalloendopeptidase activity;metallopeptidase activity;proteolysis;membrane;integral component of membrane	molecular_function;biological_process;cellular_component	PTHR11905_SF121	DISINTEGRIN AND METALLOPROTEINASE DOMAIN CONTAINING 17 ADAM 17 EC_3.4.24.86 TNF ALPHA CONVERTASE TNF ALPHA CONVERTING ENZYME CD156B ANTIGEN	GO:0008233;GO:0005575	peptidase activity;cellular_component
ENSONIG00000000097	lysine (K)-specific methyltransferase 2E	kmt2e	68.5431	85.03	-1.23898	-0.309151	6.27615	9.42219	0.00214375	0.109301	3	protein_coding	ZDB-GENE-030131-4120			GO:0005515;GO:0046872	protein binding;metal ion binding	molecular_function	PTHR16286_SF9	INACTIVE HISTONE LYSINE N METHYLTRANSFERASE 2E INACTIVE LYSINE N METHYLTRANSFERASE 2E MYELOID/LYMPHOID OR MIXED LINEAGE LEUKEMIA 5	GO:0003674;GO:0043167	molecular_function;ion binding
ENSONIG00000002797	protein kinase AMP-activated catalytic subunit alpha 2	prkaa2	37.0457	28.3956	1.302	0.380729	5.00778	9.38092	0.00219255	0.109301	2	protein_coding		100706719	I3J3R7;I3J3R8	GO:0006468;GO:0004672;GO:0005524;GO:0016740;GO:0000166;GO:0004674;GO:0016301;GO:0016310	protein phosphorylation;protein kinase activity;ATP binding;transferase activity;nucleotide binding;protein serine/threonine kinase activity;kinase activity;phosphorylation	biological_process;molecular_function	PTHR24343_SF82	5' AMP ACTIVATED KINASE CATALYTIC SUBUNIT ALPHA 2 AMPK SUBUNIT ALPHA 2 EC_2.7.11.1 ACETYL COA CARBOXYLASE KINASE ACACA KINASE EC_2.7.11.- 27 HYDROXYMETHYLGLUTARYL COA REDUCTASE KINASE HMGCR KINASE EC_2.7.-.- 11 31	GO:0003674;GO:0043167;GO:0016301;GO:0006464	molecular_function;ion binding;kinase activity;cellular protein modification process	04151+2.7.11.1;04150+2.7.11.1;05165+2.7.11.1;04926+2.7.11.1;04714+2.7.11.1;05170+2.7.11.1;05163+2.7.11.1
ENSONIG00000004293	phosphodiesterase 12	pde12	16.5316	12.154	1.36292	0.446698	3.89616	9.38996	0.00218177	0.109301	1	protein_coding	ZDB-GENE-060519-25						PTHR12121_SF37	2' 5' PHOSPHODIESTERASE 12 PRECURSOR 2' PDE 2 PDE EC_3.1.4.- MITOCHONDRIAL DEADENYLASE EC_3.1.13.4
ENSONIG00000007395			20.4442	7.83127	2.6154	1.38703	3.91551	9.41422	0.00215309	0.109301	2	protein_coding				GO:0016020;GO:0016021	membrane;integral component of membrane	cellular_component			GO:0005575	cellular_component
ENSONIG00000010415	ribitol xylosyltransferase 1	rxylt1	176.726	147.131	1.20079	0.263984	7.36296	9.39475	0.00217607	0.109301	1	protein_coding	ZDB-GENE-060929-1018	100696362	I3JW45				PTHR15576	RIBITOL 5 PHOSPHATE XYLOSYLTRANSFERASE 1 EC_2.4.2.- TRANSMEMBRANE 5 UDP D XYLOSE:RIBITOL 5 PHOSPHATE BETA1 4 XYLOSYLTRANSFERASE
ENSONIG00000010669			0.881655	2.2695	-2.54956	-1.35025	0.614523	9.40668	0.00216196	0.109301	1	protein_coding							TF602897	UNCHARACTERIZED
ENSONIG00000011388	septin-5	sept5b	325.164	260.116	1.24974	0.321624	8.14528	9.42361	0.0021421	0.109301	2	protein_coding	ZDB-GENE-040808-43	100706797	I3JZN9;I3JZN8	GO:0017157;GO:0005525;GO:0008021;GO:0000166	regulation of exocytosis;GTP binding;synaptic vesicle;nucleotide binding	biological_process;molecular_function;cellular_component	PTHR18884_SF63	SEPTIN 5 CELL DIVISION CONTROL RELATED 1 CDCREL 1 PEANUT 1	GO:0005575;GO:0043226;GO:0031410;GO:0003674;GO:0043167	cellular_component;organelle;cytoplasmic vesicle;molecular_function;ion binding
ENSONIG00000012571	4-aminobutyrate aminotransferase	abat	1713.49	1318.89	1.29913	0.377546	10.5818	9.40886	0.0021594	0.109301	1	protein_coding	ZDB-GENE-031006-4	100698450	I3K3X9	GO:0008483;GO:0030170;GO:0003824;GO:0003867;GO:0009448	transaminase activity;pyridoxal phosphate binding;catalytic activity;4-aminobutyrate transaminase activity;gamma-aminobutyric acid metabolic process	molecular_function;biological_process	PTHR11986_SF6	4 AMINOBUTYRATE AMINOTRANSFERASE MITOCHONDRIAL PRECURSOR EC_2.6.1.19 S 3 AMINO 2 METHYLPROPIONATE TRANSAMINASE EC_2.6.1.- 22 GABA AMINOTRANSFERASE GABA AT GAMMA AMINO N BUTYRATE TRANSAMINASE GABA TRANSAMINASE GABA T L AIBAT	GO:0003674;GO:0043167;GO:0044281;GO:0006520	molecular_function;ion binding;small molecule metabolic process;cellular amino acid metabolic process	00250+2.6.1.19;00650+2.6.1.19;00640+2.6.1.19;00410+2.6.1.19
ENSONIG00000012984	receptor for activated C kinase 1	rack1	386.51	514.13	-1.33019	-0.41163	8.8899	9.43969	0.0021234	0.109301	1	protein_coding	ZDB-GENE-990415-89			GO:0005515;GO:0001525;GO:0030178;GO:0032880;GO:0051302;GO:0060027;GO:2000114;GO:2000543;GO:0005737	protein binding;angiogenesis;negative regulation of Wnt signaling pathway;regulation of protein localization;regulation of cell division;convergent extension involved in gastrulation;regulation of establishment of cell polarity;positive regulation of gastrulation;cytoplasm	molecular_function;biological_process;cellular_component	PTHR19868	GUANINE NUCLEOTIDE BINDING SUBUNIT BETA RECEPTOR OF ACTIVATED KINASE C	GO:0003674;GO:0048646;GO:0005575;GO:0005737	molecular_function;anatomical structure formation involved in morphogenesis;cellular_component;cytoplasm
ENSONIG00000013208	islet cell autoantigen 1-like	ical1	30.9236	24.161	1.27688	0.35262	4.80863	9.41742	0.00214933	0.109301	1	protein_coding	ZDB-GENE-030910-4			GO:0019904	protein domain specific binding	molecular_function	PTHR10164	ISLET CELL AUTOANTIGEN 1.69 KDA ISLET CELL AUTOANTIGEN ICA69 ISLET CELL AUTOANTIGEN P69 ICAP69 P69	GO:0003674	molecular_function
ENSONIG00000014390	ubiquinol-cytochrome-c reductase complex assembly factor 2	uqcc2	51.0239	65.1063	-1.27746	-0.353282	5.8719	9.39564	0.00217502	0.109301	1	protein_coding	ZDB-GENE-040426-1726	100693558	I3KAE9	GO:0034551;GO:0005739	mitochondrial respiratory chain complex III assembly;mitochondrion	biological_process;cellular_component	TF333267	UBIQUINOL CYTOCHROME C REDUCTASE COMPLEX ASSEMBLY FACTOR 2 PRECURSOR MITOCHONDRIAL NUCLEOID FACTOR 1 MITOCHONDRIAL M19	GO:0022607;GO:0065003;GO:0005575;GO:0043226;GO:0005739	cellular component assembly;protein-containing complex assembly;cellular_component;organelle;mitochondrion
ENSONIG00000014621	calcium and integrin binding 1 (calmyrin)	cib1	24.6904	31.9999	-1.29157	-0.369122	4.76665	9.38018	0.00219344	0.109301	1	protein_coding	ZDB-GENE-050417-170			GO:0005509	calcium ion binding	molecular_function	PTHR23056_SF32	CALCIUM AND INTEGRIN BINDING 1 CIB CALMYRIN DNA PKCS INTERACTING KINASE INTERACTING KIP	GO:0003674;GO:0043167	molecular_function;ion binding
ENSONIG00000016183	sterile alpha motif domain containing 8	SAMD8	136.804	110.003	1.24329	0.314167	6.94917	9.42672	0.00213846	0.109301	1	protein_coding		100701171	I3KGY5	GO:0005515;GO:0016020;GO:0016021	protein binding;membrane;integral component of membrane	molecular_function;cellular_component	PTHR21290_SF25	SYNTHASE SYNTHASE SYNTHASE	GO:0003674;GO:0005575	molecular_function;cellular_component
ENSONIG00000018148	D-dopachrome decarboxylase	ddt	18.8901	25.2832	-1.33473	-0.416545	4.57761	9.39765	0.00217264	0.109301	1	protein_coding	ZDB-GENE-040625-160	100703572	I3KP21	GO:0043066;GO:0048839	negative regulation of apoptotic process;inner ear development	biological_process	PTHR11954_SF22	D DOPACHROME DECARBOXYLASE EC_4.1.1.84 D DOPACHROME TAUTOMERASE	GO:0048856	anatomical structure development
ENSONIG00000019711	myocardin related transcription factor Ab	mrtfab	31.6757	40.7936	-1.28458	-0.361294	5.14206	9.35803	0.00222011	0.110319	1	protein_coding	ZDB-GENE-030131-681			GO:0003713;GO:0005737;GO:0005634;GO:0010735;GO:0003785	transcription coactivator activity;cytoplasm;nucleus;positive regulation of transcription via serum response element binding;actin monomer binding	molecular_function;cellular_component;biological_process	PTHR22793	MYOCARDIN RELATED TRANSCRIPTION FACTOR MRTF MKL/MYOCARDIN MEGAKARYOBLASTIC LEUKEMIA	GO:0005575;GO:0043226;GO:0005634;GO:0005737;GO:0003674;GO:0008092	cellular_component;organelle;nucleus;cytoplasm;molecular_function;cytoskeletal protein binding
ENSONIG00000005395			12.0759	7.58657	1.58933	0.668417	3.22922	9.34966	0.00223027	0.110514	1	protein_coding				GO:0003676	nucleic acid binding	molecular_function	PTHR24409_SF10	ZINC FINGER	GO:0003674	molecular_function
ENSONIG00000018630	SEC62 homolog, preprotein translocation factor	sec62	58.4989	75.5846	-1.29019	-0.367584	6.14955	9.33742	0.00224522	0.110944	1	protein_coding	ZDB-GENE-050913-83	100697796	I3KQQ4	GO:0030176;GO:0015031;GO:0016020;GO:0016021	integral component of endoplasmic reticulum membrane;protein transport;membrane;integral component of membrane	cellular_component;biological_process	PTHR12443	TRANSLOCATION SEC62	GO:0006810;GO:0005575	transport;cellular_component
ENSONIG00000016526	cornichon family AMPA receptor auxiliary protein 4	cnih4	204.494	158.95	1.28571	0.362569	7.48935	9.31921	0.00226764	0.111429	1	protein_coding	ZDB-GENE-030131-868	100710433	I3KI66	GO:0016192;GO:0016020;GO:0016021	vesicle-mediated transport;membrane;integral component of membrane	biological_process;cellular_component	PTHR12290	CORNICHON HOMOLOG CNIH CORNICHON FAMILY AMPA RECEPTOR AUXILIARY	GO:0006810;GO:0016192;GO:0005575	transport;vesicle-mediated transport;cellular_component
ENSONIG00000022781			0.917347	2.06326	-2.20853	-1.14309	0.607846	9.32167	0.00226459	0.111429	1	lincRNA
ENSONIG00000007876	rogdi atypical leucine zipper	rogdi	306.697	248.422	1.23416	0.303532	8.11473	9.30098	0.00229032	0.112232	1	protein_coding	ZDB-GENE-030131-7582	100701867	I3JM35				PTHR13618	ROGDI HOMOLOG
ENSONIG00000005005	trafficking protein particle complex subunit 6B	trappc6bl	162.338	109.602	1.48118	0.566742	7.15957	9.29454	0.00229837	0.112316	2	protein_coding	ZDB-GENE-040426-1602	100704500	I3JBQ5;I3JBQ6	GO:0048193;GO:0043087	Golgi vesicle transport;regulation of GTPase activity	biological_process	PTHR12817	TRAFFICKING PARTICLE COMPLEX SUBUNIT TRAPP COMPLEX SUBUNIT	GO:0008150;GO:0006810;GO:0016192	biological_process;transport;vesicle-mediated transport
ENSONIG00000012793	U2 small nuclear RNA auxiliary factor 2b	u2af2b	22.8481	31.1717	-1.36273	-0.446501	4.80678	9.26904	0.0023306	0.113265	1	protein_coding	ZDB-GENE-040426-1881			GO:0006397;GO:0003723;GO:0003676;GO:0005634;GO:0008380	mRNA processing;RNA binding;nucleic acid binding;nucleus;RNA splicing	biological_process;molecular_function;cellular_component	PTHR23139_SF53	SPLICING FACTOR U2AF 65 KDA SUBUNIT U2 AUXILIARY FACTOR 65 KDA SUBUNIT U2 SNRNP AUXILIARY FACTOR LARGE SUBUNIT	GO:0005575;GO:0043226;GO:0005634;GO:0003674;GO:0003723;GO:0034641;GO:0006397	cellular_component;organelle;nucleus;molecular_function;RNA binding;cellular nitrogen compound metabolic process;mRNA processing
ENSONIG00000019340	adenosine receptor A1		18.915	13.446	1.40193	0.487415	4.04747	9.27348	0.00232496	0.113265	1	protein_coding		100698466	I3KT97	GO:0016021;GO:0007186;GO:0004930;GO:0001609;GO:0001973;GO:0016020;GO:0007165;GO:0005886	integral component of membrane;G protein-coupled receptor signaling pathway;G protein-coupled receptor activity;G protein-coupled adenosine receptor activity;adenosine receptor signaling pathway;membrane;signal transduction;plasma membrane	cellular_component;biological_process;molecular_function	PTHR24246	ADENOSINE RECEPTOR	GO:0003674;GO:0007165;GO:0005575;GO:0005886	molecular_function;signal transduction;cellular_component;plasma membrane
ENSONIG00000014377	ribosomal protein L29	rpl29	69.3868	137.889	-1.98644	-0.990182	6.99285	9.25611	0.00234711	0.113754	1	protein_coding	ZDB-GENE-040801-167			GO:0005622;GO:0005840;GO:0006412;GO:0003735	intracellular;ribosome;translation;structural constituent of ribosome	cellular_component;biological_process;molecular_function	PTHR12884	60S RIBOSOMAL L29	GO:0003674;GO:0005198;GO:0003735;GO:0009058;GO:0034641;GO:0006412;GO:0032991;GO:0005575;GO:0043226;GO:0005840;GO:0005622	molecular_function;structural molecule activity;structural constituent of ribosome;biosynthetic process;cellular nitrogen compound metabolic process;translation;protein-containing complex;cellular_component;organelle;ribosome;intracellular
ENSONIG00000007458	nucleoporin 98	nup98	24.1948	33.8703	-1.39865	-0.484036	4.85117	9.22069	0.00239296	0.11566	2	protein_coding	ZDB-GENE-040426-1180			GO:0005643;GO:0006913;GO:0017056;GO:0048484	nuclear pore;nucleocytoplasmic transport;structural constituent of nuclear pore;enteric nervous system development	cellular_component;biological_process;molecular_function	PTHR23198_SF0	NUCLEAR PORE COMPLEX NUP98 NUP96 EC_3.4.21.- [CONTAINS NUCLEAR PORE COMPLEX NUP98.98 KDA NUCLEOPORIN NUCLEOPORIN NUP98 ; NUCLEAR PORE COMPLEX NUP96 96 KDA NUCLEOPORIN NUCLEOPORIN NUP96 ]	GO:0003674;GO:0006810;GO:0006913;GO:0005198;GO:0032991;GO:0005575;GO:0048856	molecular_function;transport;nucleocytoplasmic transport;structural molecule activity;protein-containing complex;cellular_component;anatomical structure development
ENSONIG00000004084	RHO family interacting cell polarization regulator 1	ripor1	14.1431	9.65127	1.46271	0.548641	3.58735	9.20722	0.00241062	0.116196	2	protein_coding	ZDB-GENE-050420-32	100706397	I3J8F8;I3J8F7				PTHR15829	RHO FAMILY INTERACTING CELL POLARIZATION REGULATOR
ENSONIG00000006806	integrin subunit beta like 1	itgbl1	239.053	184.704	1.29389	0.371715	7.70191	9.17617	0.00245187	0.116643	1	protein_coding	ZDB-GENE-050522-410	100691283	I3JI96				PTHR10082	INTEGRIN BETA PRECURSOR
ENSONIG00000007365	mitoguardin 2	miga2	81.0459	65.2364	1.24163	0.312239	6.1366	9.18236	0.00244359	0.116643	1	protein_coding	ZDB-GENE-050320-135	100692634	I3JK98	GO:0008053	mitochondrial fusion	biological_process	PTHR21508	MITOGUARDIN	GO:0007005	mitochondrion organization
ENSONIG00000007562	prune homolog 2 with BCH domain	prune2	82.8589	65.7	1.25947	0.332822	6.23306	9.17248	0.00245682	0.116643	1	protein_coding	ZDB-GENE-050309-222			GO:0016020;GO:0016021	membrane;integral component of membrane	cellular_component	PTHR12112_SF11	PRUNE HOMOLOG 2 BNIP2 MOTIF CONTAINING MOLECULE AT THE C TERMINAL REGION 1	GO:0005575	cellular_component
ENSONIG00000009319	suppressor of IKBKE 1	im:6912630	32.2364	25.1776	1.28029	0.356475	4.8449	9.17075	0.00245913	0.116643	1	protein_coding	ZDB-GENE-041008-63	100712294	I3JS70				PTHR12186	SUPPRESSOR OF IKBKE 1 SUPPRESSOR OF IKK EPSILON
ENSONIG00000011974			3.16438	1.69864	1.87781	0.909048	1.42708	9.17052	0.00245945	0.116643	1	protein_coding				GO:0003676	nucleic acid binding	molecular_function	PTHR24409_SF10	ZINC FINGER	GO:0003674	molecular_function
ENSONIG00000019838			3.41775	6.09308	-1.77414	-0.827121	2.3874	9.18379	0.00244168	0.116643	1	protein_coding				GO:0003998;GO:0016787	acylphosphatase activity;hydrolase activity	molecular_function	PTHR10029_SF5	ACYLPHOSPHATASE 2 EC_3.6.1.7 ACYLPHOSPHATASE MUSCLE TYPE ISOZYME ACYLPHOSPHATE PHOSPHOHYDROLASE 2			00620+3.6.1.7;00627+3.6.1.7
ENSONIG00000010250	nucleoporin 93	nup93	53.4256	72.3496	-1.35198	-0.435073	5.98955	9.15712	0.00247753	0.117186	1	protein_coding	ZDB-GENE-990415-46	100696986	I3JVJ5	GO:0005643;GO:0017056;GO:0016020;GO:0005634;GO:0006913;GO:0015031;GO:0051028	nuclear pore;structural constituent of nuclear pore;membrane;nucleus;nucleocytoplasmic transport;protein transport;mRNA transport	cellular_component;molecular_function;biological_process	PTHR11225	NUCLEAR PORE COMPLEX NUP93.93 KDA NUCLEOPORIN NUCLEOPORIN NUP93	GO:0003674;GO:0006810;GO:0006913;GO:0005198;GO:0032991;GO:0005575;GO:0043226;GO:0005634	molecular_function;transport;nucleocytoplasmic transport;structural molecule activity;protein-containing complex;cellular_component;organelle;nucleus
ENSONIG00000013952	natriuretic peptide receptor 3	npr3	149.666	117.884	1.26868	0.343323	7.00268	9.13937	0.00250168	0.118013	1	protein_coding	ZDB-GENE-060531-91	100704651	I3K8U1	GO:0016021;GO:0016020;GO:0060038	integral component of membrane;membrane;cardiac muscle cell proliferation	cellular_component;biological_process	PTHR11920_SF2	ATRIAL NATRIURETIC PEPTIDE RECEPTOR 3 PRECURSOR ATRIAL NATRIURETIC PEPTIDE CLEARANCE RECEPTOR ATRIAL NATRIURETIC PEPTIDE RECEPTOR TYPE C ANP C ANPR C NPR C	GO:0005575;GO:0008283;GO:0048856;GO:0040007	cellular_component;cell population proliferation;anatomical structure development;growth
ENSONIG00000003724	autophagy related 3	atg3	82.5253	67.7563	1.21735	0.283747	6.21795	9.10106	0.00255462	0.120189	1	protein_coding	ZDB-GENE-030131-8576	100693820	I3J743	GO:0005737;GO:0015031;GO:0006914	cytoplasm;protein transport;autophagy	cellular_component;biological_process	PTHR12866	AUTOPHAGY RELATED 3 AUTOPHAGY RELATED E2 CONJUGATION ENZYME ATG3	GO:0005575;GO:0005737;GO:0006810;GO:0009056;GO:0006914	cellular_component;cytoplasm;transport;catabolic process;autophagy
ENSONIG00000011092	leucine rich repeat and fibronectin type III domain containing 1	lrfn1	33.0881	25.5769	1.2913	0.368822	4.83276	9.08629	0.00257533	0.120527	1	protein_coding	ZDB-GENE-040426-1227			GO:0005515;GO:0016020;GO:0016021	protein binding;membrane;integral component of membrane	molecular_function;cellular_component	PTHR24373_SF34	LEUCINE RICH REPEAT AND FIBRONECTIN TYPE III DOMAIN CONTAINING 1 PRECURSOR SYNAPTIC ADHESION MOLECULE 2	GO:0003674;GO:0005575	molecular_function;cellular_component
ENSONIG00000026403			4.16118	7.12417	-1.70543	-0.770135	2.607	9.08623	0.00257541	0.120527	1	lincRNA
ENSONIG00000011987	tripartite motif containing 25, like	trim25l	1.12853	0.364625	3.11409	1.63881	0.0946025	9.06556	0.00260469	0.121575	1	protein_coding	ZDB-GENE-040914-87			GO:0008270;GO:0005515;GO:0046872	zinc ion binding;protein binding;metal ion binding	molecular_function	PTHR24103_SF263	E3 UBIQUITIN LIGASE RNF135 EC_2.3.2.27 RING FINGER 135 RING TYPE E3 UBIQUITIN TRANSFERASE RNF135	GO:0003674;GO:0043167	molecular_function;ion binding
ENSONIG00000016637	inositol monophosphatase domain containing 1	impad1	22.0883	11.5876	1.90509	0.929857	3.95435	9.0554	0.00261921	0.121931	1	protein_coding	ZDB-GENE-051127-23			GO:0046854	phosphatidylinositol phosphorylation	biological_process	PTHR20854_SF18	INOSITOL MONOPHOSPHATASE 3 IMP 3 IMPASE 3 EC_3.1.3.25 INOSITOL 1 OR 4 MONOPHOSPHATASE 3 MYO INOSITOL MONOPHOSPHATASE A3	GO:0006629	lipid metabolic process
ENSONIG00000002648	centromere protein I	cenpi	5.64772	8.24051	-1.46288	-0.548812	2.86254	9.03358	0.00265064	0.12307	1	protein_coding	ZDB-GENE-060810-127			GO:0000776;GO:0034508	kinetochore;centromere complex assembly	cellular_component;biological_process	PTHR15408	CENTROMERE I CENP I FSH PRIMARY RESPONSE 1 FOLLICLE STIMULATING HORMONE PRIMARY RESPONSE LEUCINE RICH PRIMARY RESPONSE 1	GO:0051276;GO:0022607;GO:0065003;GO:0032991;GO:0005575;GO:0043226	chromosome organization;cellular component assembly;protein-containing complex assembly;protein-containing complex;cellular_component;organelle
ENSONIG00000012272	rho-related GTP-binding protein RhoA-D		188.639	149.227	1.26361	0.337556	7.39686	9.02816	0.00265852	0.123113	1	protein_coding		100693083	I3K2W1	GO:0007264;GO:0003924;GO:0005622;GO:0005525;GO:0000166;GO:0044319;GO:1902766	small GTPase mediated signal transduction;GTPase activity;intracellular;GTP binding;nucleotide binding;wound healing, spreading of cells;skeletal muscle satellite cell migration	biological_process;molecular_function;cellular_component	PTHR24072_SF100	RHO RELATED GTP BINDING PRECURSOR	GO:0003674;GO:0043167;GO:0005575;GO:0005622;GO:0003924;GO:0007165;GO:0048870;GO:0040011	molecular_function;ion binding;cellular_component;intracellular;GTPase activity;signal transduction;cell motility;locomotion
ENSONIG00000000122			6.17055	3.76027	1.63333	0.70782	2.29267	9.02256	0.00266667	0.123168	1	protein_coding				GO:0003676	nucleic acid binding	molecular_function	PTHR24377_SF205	ZINC FINGER	GO:0003674	molecular_function
ENSONIG00000020532	adrenoceptor beta 3a	adrb3a	1.52803	2.90208	-1.90436	-0.929304	1.37353	9.00732	0.002689	0.123554	1	protein_coding	ZDB-GENE-080917-21			GO:0016021;GO:0007186;GO:0004930;GO:0016020;GO:0007165	integral component of membrane;G protein-coupled receptor signaling pathway;G protein-coupled receptor activity;membrane;signal transduction	cellular_component;biological_process;molecular_function	PTHR24248_SF3	BETA 3 ADRENERGIC RECEPTOR BETA 3 ADRENORECEPTOR BETA 3 ADRENOCEPTOR	GO:0003674;GO:0007165;GO:0005575	molecular_function;signal transduction;cellular_component
ENSONIG00000024397			1.74196	0.472342	3.59466	1.84585	0.359336	9.00845	0.00268734	0.123554	1	lincRNA
ENSONIG00000008086	myosin-6		3.30471	6.95493	-2.11714	-1.08212	1.91505	8.99469	0.00270765	0.124089	1	protein_coding		100707241	I3JMU2	GO:0016459;GO:0003774;GO:0051015;GO:0005524;GO:0005515;GO:0000166;GO:0003779	myosin complex;motor activity;actin filament binding;ATP binding;protein binding;nucleotide binding;actin binding	cellular_component;molecular_function	PTHR13140_SF260	MYOSIN 6 MYOSIN HEAVY CHAIN 6 MYOSIN HEAVY CHAIN CARDIAC MUSCLE ALPHA MYHC ALPHA	GO:0003674;GO:0043167;GO:0008092;GO:0032991;GO:0005575;GO:0043226;GO:0005856	molecular_function;ion binding;cytoskeletal protein binding;protein-containing complex;cellular_component;organelle;cytoskeleton
ENSONIG00000025085			10.2707	15.6404	-1.51774	-0.601923	3.58565	8.98027	0.0027291	0.124749	2	lincRNA
ENSONIG00000026855			0.717339	2.95868	-4.14492	-2.05134	0.460633	8.97489	0.00273715	0.124794	2	lincRNA
ENSONIG00000001012	UBX domain protein 2A	ubxn2a	46.5934	66.3659	-1.42561	-0.511583	5.8894	8.96348	0.0027543	0.125253	1	protein_coding	ZDB-GENE-110411-202	100707967	I3IXE1	GO:0005515	protein binding	molecular_function	PTHR23333	UBX DOMAIN CONTAINING	GO:0003674	molecular_function
ENSONIG00000000467	SOS Ras/Rho guanine nucleotide exchange factor 2	sos2	25.0033	35.8941	-1.43626	-0.522312	4.86736	8.93291	0.00280077	0.126998	2	protein_coding	ZDB-GENE-090319-5	100701539	I3IVF6;I3IVF5	GO:0000786;GO:0046982;GO:0005085;GO:0007264;GO:0035023;GO:0005089;GO:0005622;GO:0003677;GO:0048793	nucleosome;protein heterodimerization activity;guanyl-nucleotide exchange factor activity;small GTPase mediated signal transduction;regulation of Rho protein signal transduction;Rho guanyl-nucleotide exchange factor activity;intracellular;DNA binding;pronephros development	cellular_component;molecular_function;biological_process	PTHR23113_SF150	SON OF SEVENLESS HOMOLOG 2 SOS 2	GO:0003674;GO:0003677;GO:0005575;GO:0005622;GO:0007165;GO:0032991;GO:0048856	molecular_function;DNA binding;cellular_component;intracellular;signal transduction;protein-containing complex;anatomical structure development
ENSONIG00000000791	solute carrier family 25 member 47	slc25a47a	152.57	120.447	1.26572	0.339954	7.08923	8.92844	0.00280764	0.126998	2	protein_coding	ZDB-GENE-060616-266	100700982	I3IWL3;I3IWL2	GO:0055085;GO:0022857;GO:0016020;GO:0016021	transmembrane transport;transmembrane transporter activity;membrane;integral component of membrane	biological_process;molecular_function;cellular_component	PTHR24089_SF224	SOLUTE CARRIER FAMILY 25 MEMBER 47 HEPATOCELLULAR CARCINOMA DOWN REGULATED MITOCHONDRIAL CARRIER	GO:0022857;GO:0003674;GO:0006810;GO:0055085;GO:0005575	transmembrane transporter activity;molecular_function;transport;transmembrane transport;cellular_component
ENSONIG00000018831	alpha-internexin	inab	269.774	206.614	1.30529	0.384373	7.924	8.92417	0.00281421	0.126998	1	protein_coding	ZDB-GENE-990415-83	100699687	I3KRG6	GO:0007399;GO:0005882;GO:0005198;GO:0005883;GO:0048812	nervous system development;intermediate filament;structural molecule activity;neurofilament;neuron projection morphogenesis	biological_process;cellular_component;molecular_function	PTHR23239_SF132	NEUROFILAMENT POLYPEPTIDE NF KDA NEUROFILAMENT NEUROFILAMENT TRIPLET	GO:0003674;GO:0005198;GO:0005575;GO:0048856	molecular_function;structural molecule activity;cellular_component;anatomical structure development
ENSONIG00000003291	rho GDP-dissociation inhibitor 1		72.6891	90.0872	-1.23771	-0.30767	6.3966	8.91371	0.00283038	0.127258	1	protein_coding		100702903	I3J5J0	GO:0005737;GO:0005094;GO:0050790	cytoplasm;Rho GDP-dissociation inhibitor activity;regulation of catalytic activity	cellular_component;molecular_function;biological_process	PTHR10980	RHO GDP DISSOCIATION INHIBITOR RHO GDI RHO GDI	GO:0005575;GO:0005737;GO:0003674;GO:0030234;GO:0008150	cellular_component;cytoplasm;molecular_function;enzyme regulator activity;biological_process
ENSONIG00000012864	synaptotagmin 12	syt12	761.871	606.737	1.25554	0.328312	9.40767	8.91115	0.00283435	0.127258	1	protein_coding	ZDB-GENE-081022-147	100701558	I3K4Z3	GO:0016020;GO:0046928;GO:0060291;GO:0016021	membrane;regulation of neurotransmitter secretion;long-term synaptic potentiation;integral component of membrane	cellular_component;biological_process	PTHR10024_SF181	SYNAPTOTAGMIN 12 SYNAPTOTAGMIN XII SYTXII	GO:0005575	cellular_component
ENSONIG00000012940	sideroflexin 1	sfxn1	35.5627	28.0397	1.26781	0.342336	5.05681	8.90459	0.00284455	0.127393	1	protein_coding	ZDB-GENE-040801-45	100705454	I3K583	GO:0015075;GO:0006811;GO:0055085;GO:0016020;GO:0016021;GO:0034220;GO:0005739;GO:0031966	ion transmembrane transporter activity;ion transport;transmembrane transport;membrane;integral component of membrane;ion transmembrane transport;mitochondrion;mitochondrial membrane	molecular_function;biological_process;cellular_component	PTHR11153	SIDEROFLEXIN	GO:0005575;GO:0006810;GO:0055085;GO:0022857;GO:0003674;GO:0043226;GO:0005739	cellular_component;transport;transmembrane transport;transmembrane transporter activity;molecular_function;organelle;mitochondrion
ENSONIG00000005328	cytochrome c oxidase subunit 6C-1	cox6c	127.436	211.252	-1.65715	-0.728707	7.58791	8.88974	0.00286778	0.127465	1	protein_coding	ZDB-GENE-040724-95	100695052	I3JCW1	GO:0004129;GO:0022900;GO:1902600	cytochrome-c oxidase activity;electron transport chain;proton transmembrane transport	molecular_function;biological_process	TF639653	UNCHARACTERIZED	GO:0016491;GO:0022857;GO:0003674;GO:0006091;GO:0006810;GO:0055085	oxidoreductase activity;transmembrane transporter activity;molecular_function;generation of precursor metabolites and energy;transport;transmembrane transport
ENSONIG00000008246	MARCKS-related protein	marcksl1a	435.869	552.532	-1.26734	-0.341809	9.03721	8.89713	0.00285619	0.127465	1	protein_coding	ZDB-GENE-040426-2146	100704961	I3JND3	GO:0005516;GO:0003407;GO:0007417;GO:0051216	calmodulin binding;neural retina development;central nervous system development;cartilage development	molecular_function;biological_process	PTHR14353_SF6	MARCKS RELATED 1 MARCKS 1 A MARCKS 1 B	GO:0003674;GO:0048856	molecular_function;anatomical structure development
ENSONIG00000023153			0.533601	1.89527	-3.40484	-1.76759	0.503156	8.89409	0.00286095	0.127465	1	lincRNA
ENSONIG00000020792	protein O-linked mannose N-acetylglucosaminyltransferase 2 (beta 1,4-)	pomgnt2	31.4291	23.8733	1.31403	0.393993	4.76362	8.87529	0.00289057	0.128156	1	protein_coding	ZDB-GENE-050522-242	100709211	I3KYA0	GO:0016757;GO:0005515;GO:0016020;GO:0016021	transferase activity, transferring glycosyl groups;protein binding;membrane;integral component of membrane	molecular_function;cellular_component	PTHR20961_SF0	O LINKED MANNOSE BETA 1 4 N ACETYLGLUCOSAMINYLTRANSFERASE 2 POMGNT2 EC_2.4.1.312 EXTRACELLULAR O LINKED N ACETYLGLUCOSAMINE TRANSFERASE GLYCOSYLTRANSFERASE DOMAIN CONTAINING 2	GO:0003674;GO:0016757;GO:0005575	molecular_function;transferase activity, transferring glycosyl groups;cellular_component
ENSONIG00000012639	CREB regulated transcription coactivator 1b	crtc1b	23.3332	31.5413	-1.34664	-0.429359	4.73971	8.86781	0.00290244	0.12836	1	protein_coding	ZDB-GENE-041210-266			GO:0032793;GO:0008140;GO:0051289;GO:0005737;GO:0005634	positive regulation of CREB transcription factor activity;cAMP response element binding protein binding;protein homotetramerization;cytoplasm;nucleus	biological_process;molecular_function;cellular_component	PTHR13589	CREB REGULATED TRANSCRIPTION COACTIVATOR TRANSDUCER OF REGULATED CAMP RESPONSE ELEMENT BINDING TORC TRANSDUCER OF CREB	GO:0005575;GO:0043226;GO:0005634;GO:0005737;GO:0022607;GO:0065003;GO:0003674;GO:0008134	cellular_component;organelle;nucleus;cytoplasm;cellular component assembly;protein-containing complex assembly;molecular_function;transcription factor binding
ENSONIG00000019273	ADP ribosylation factor GTPase activating protein 1	arfgap1	211.485	163.005	1.29686	0.375026	7.47342	8.86009	0.00291473	0.128582	1	protein_coding	ZDB-GENE-041114-130	100693143	I3KT09	GO:0005096;GO:0046872;GO:0043547	GTPase activator activity;metal ion binding;positive regulation of GTPase activity	molecular_function;biological_process	PTHR23180_SF35	ADP RIBOSYLATION FACTOR GTPASE ACTIVATING 1 ARF GAP 1 ADP RIBOSYLATION FACTOR 1 GTPASE ACTIVATING ARF1 GAP ARF1 DIRECTED GTPASE ACTIVATING	GO:0003674;GO:0030234;GO:0043167	molecular_function;enzyme regulator activity;ion binding
ENSONIG00000003206	copine family member 9	CPNE9 (1 of many)	57.476	72.3167	-1.2575	-0.330562	5.96358	8.83396	0.00295677	0.129459	2	protein_coding			I3J581;I3J582				PTHR10857_SF10	COPINE 9 COPINE IX
ENSONIG00000003657	cytidine monophosphate (UMP-CMP) kinase 2, mitochondrial	cmpk2	7.93587	3.14195	2.53256	1.34059	2.63539	8.84303	0.0029421	0.129459	1	protein_coding	ZDB-GENE-040724-24						PTHR10344	THYMIDYLATE KINASE EC_2.7.4.9 DTMP KINASE			00240+2.7.4.9
ENSONIG00000018109			34.2446	48.5026	-1.4133	-0.499069	5.31255	8.83716	0.00295158	0.129459	1	protein_coding				GO:0061001;GO:0034446;GO:0030334	regulation of dendritic spine morphogenesis;substrate adhesion-dependent cell spreading;regulation of cell migration	biological_process	PTHR22741_SF5	SRC KINASE SIGNALING INHIBITOR 1 SNAP 25 INTERACTING SNIP P130CAS ASSOCIATED P140CAP	GO:0007155;GO:0000902	cell adhesion;cell morphogenesis
ENSONIG00000019125	renalase, FAD dependent amine oxidase	rnls	16.8849	22.547	-1.33371	-0.41545	4.37946	8.82958	0.00296386	0.129459	1	protein_coding	ZDB-GENE-040718-351	100700836	I3KSH6	GO:0016651;GO:0055114;GO:0016491	oxidoreductase activity, acting on NAD(P)H;oxidation-reduction process;oxidoreductase activity	molecular_function;biological_process	PTHR23357	RENALASE PRECURSOR EC_1.6.3.5 MONOAMINE OXIDASE C MAO C	GO:0016491	oxidoreductase activity
ENSONIG00000006471	COP9 signalosome subunit 9	cops9	13.9828	24.5309	-1.74928	-0.806758	4.48264	8.82117	0.00297756	0.129737	1	protein_coding	ZDB-GENE-040426-1883						TF323869	UNCHARACTERIZED
ENSONIG00000002600	plasminogen activator inhibitor 1 RNA-binding protein	serbp1a	184.729	228.292	-1.23513	-0.304662	7.76295	8.8028	0.00300768	0.130444	1	protein_coding	ZDB-GENE-030131-7389	100699359	I3J316	GO:0003730;GO:0003723	mRNA 3'-UTR binding;RNA binding	molecular_function	PTHR12299	INTRACELLULAR HYALURONAN BINDING 4 IHABP4	GO:0003674;GO:0003723;GO:0003729	molecular_function;RNA binding;mRNA binding
ENSONIG00000012507	malignant fibrous histiocytoma amplified sequence 1	mfhas1	14.4805	20.1797	-1.39151	-0.476654	4.0879	8.80227	0.00300855	0.130444	2	protein_coding	ZDB-GENE-080917-20			GO:0005515	protein binding	molecular_function	PTHR23155_SF9	MALIGNANT FIBROUS HISTIOCYTOMA AMPLIFIED SEQUENCE 1	GO:0003674	molecular_function	04151+2.7.11.1;04150+2.7.11.1;05165+2.7.11.1;04926+2.7.11.1;04714+2.7.11.1;05170+2.7.11.1;05163+2.7.11.1
ENSONIG00000007330	GTP binding protein 6 (putative)	gtpbp6	2.18813	3.95633	-1.79393	-0.843125	1.59115	8.78797	0.00303223	0.13115	1	protein_coding	ZDB-GENE-031118-62	100697362	I3JK50	GO:0005525	GTP binding	molecular_function	PTHR10229	GTP BINDING 6	GO:0003674;GO:0043167	molecular_function;ion binding
ENSONIG00000006652	SPRY domain containing 7	spryd7b	138.519	109.629	1.26246	0.336234	6.93817	8.76094	0.0030775	0.131557	1	protein_coding	ZDB-GENE-040426-1634	100704363	I3JHQ8	GO:0005515	protein binding	molecular_function	PTHR20951	SPRY DOMAIN CONTAINING 7 CHRONIC LYMPHOCYTIC LEUKEMIA DELETION REGION GENE 6 HOMOLOG CLL DELETION REGION GENE 6 HOMOLOG	GO:0003674	molecular_function
ENSONIG00000012642	DCC netrin 1 receptor	dcc	16.5827	23.4523	-1.41151	-0.497243	4.19327	8.76218	0.00307541	0.131557	1	protein_coding	ZDB-GENE-011101-2			GO:0007399;GO:0007411;GO:0016021;GO:0006915;GO:0005515;GO:0005042;GO:0016020;GO:0038006;GO:0016358;GO:0021952;GO:0021960;GO:0030516;GO:0031103;GO:0033564;GO:0038007;GO:0048665;GO:0048846;GO:0050918;GO:0071678	nervous system development;axon guidance;integral component of membrane;apoptotic process;protein binding;netrin receptor activity;membrane;netrin receptor activity involved in chemoattraction;dendrite development;central nervous system projection neuron axonogenesis;anterior commissure morphogenesis;regulation of axon extension;axon regeneration;anterior/posterior axon guidance;netrin-activated …	biological_process;cellular_component;molecular_function	PTHR10489_SF68	NETRIN RECEPTOR DCC PRECURSOR TUMOR SUPPRESSOR DCC	GO:0003674;GO:0008219;GO:0005575;GO:0048856;GO:0040011;GO:0006950;GO:0007165;GO:0040007	molecular_function;cell death;cellular_component;anatomical structure development;locomotion;response to stress;signal transduction;growth
ENSONIG00000015317	sorting nexin 17	snx17	54.6336	44.619	1.22414	0.291769	5.65536	8.77647	0.00305141	0.131557	1	protein_coding	ZDB-GENE-030131-9475			GO:0035091;GO:0006886;GO:0007165;GO:0005623	phosphatidylinositol binding;intracellular protein transport;signal transduction;cell	molecular_function;biological_process;cellular_component	PTHR12431	SORTING NEXIN	GO:0007165;GO:0006810;GO:0003674;GO:0043167;GO:0008289;GO:0005575;GO:0005623	signal transduction;transport;molecular_function;ion binding;lipid binding;cellular_component;cell
ENSONIG00000017879		zgc:175066	2.13481	4.09304	-1.90234	-0.927772	1.76783	8.77122	0.00306021	0.131557	2	protein_coding	ZDB-GENE-091027-2						TF332095	AMBIGUOUS
ENSONIG00000024402			0.988569	2.29984	-2.36209	-1.24007	0.83873	8.76015	0.00307885	0.131557	1	lincRNA
ENSONIG00000021016	SLIT and NTRK like family member 1	SLITRK1	40.3642	54.5548	-1.34948	-0.432404	5.50037	8.7423	0.00310913	0.132531	1	protein_coding		100691067	I3KYX2	GO:0005515;GO:0016020;GO:0016021	protein binding;membrane;integral component of membrane	molecular_function;cellular_component	PTHR24373_SF33	SLIT AND NTRK 1 PRECURSOR	GO:0003674;GO:0005575	molecular_function;cellular_component
ENSONIG00000012508	nucleolin	ncl	201.09	245.26	-1.21926	-0.286002	7.83244	8.7304	0.00312949	0.133078	1	protein_coding	ZDB-GENE-030131-6986	100711759	I3K3Q2	GO:0003676;GO:0003723;GO:0001947;GO:0006364;GO:0009303	nucleic acid binding;RNA binding;heart looping;rRNA processing;rRNA transcription	molecular_function;biological_process	PTHR24012_SF319	NUCLEOLIN C23	GO:0003674;GO:0003723;GO:0048856;GO:0034641;GO:0009058	molecular_function;RNA binding;anatomical structure development;cellular nitrogen compound metabolic process;biosynthetic process
ENSONIG00000002349	solute carrier family 1 (high affinity aspartate/glutamate transporter), member 6	slc1a6	184.28	151.561	1.21549	0.281539	7.41284	8.6869	0.00320505	0.133994	1	protein_coding	ZDB-GENE-071004-45			GO:0015293;GO:0016021;GO:0016020;GO:0055085	symporter activity;integral component of membrane;membrane;transmembrane transport	molecular_function;cellular_component;biological_process	PTHR11958_SF29	EXCITATORY AMINO ACID TRANSPORTER 4 HIGH AFFINITY NEURONAL GLUTAMATE TRANSPORTER SODIUM DEPENDENT GLUTAMATE/ASPARTATE TRANSPORTER SOLUTE CARRIER FAMILY 1 MEMBER 6	GO:0005575;GO:0022857;GO:0003674;GO:0006810;GO:0055085	cellular_component;transmembrane transporter activity;molecular_function;transport;transmembrane transport
ENSONIG00000002581	oculocerebrorenal syndrome of Lowe	ocrl	19.578	29.3885	-1.49895	-0.583953	4.62308	8.69243	0.00319535	0.133994	1	protein_coding	ZDB-GENE-061110-61			GO:0046856;GO:0007165;GO:0016787;GO:0005623;GO:0004439;GO:0001755;GO:0003341;GO:0006897;GO:0007420;GO:0032402;GO:0043009;GO:0043473;GO:0044782;GO:0048701;GO:0048884;GO:0060271;GO:0071871;GO:0097205	phosphatidylinositol dephosphorylation;signal transduction;hydrolase activity;cell;phosphatidylinositol-4,5-bisphosphate 5-phosphatase activity;neural crest cell migration;cilium movement;endocytosis;brain development;melanosome transport;chordate embryonic development;pigmentation;cilium organization;embryonic cranial skeleton morphogenesis;neuromast development;cilium assembly;response to epine…	biological_process;molecular_function;cellular_component	PTHR11200_SF121	INOSITOL POLYPHOSPHATE 5 PHOSPHATASE OCRL 1 EC_3.1.3.36	GO:0007165;GO:0006629;GO:0005575;GO:0005623;GO:0016791;GO:0048870;GO:0040011;GO:0006810;GO:0016192;GO:0048856;GO:0009790;GO:0008150;GO:0043473;GO:0022607	signal transduction;lipid metabolic process;cellular_component;cell;phosphatase activity;cell motility;locomotion;transport;vesicle-mediated transport;anatomical structure development;embryo development;biological_process;pigmentation;cellular component assembly	00562+3.1.3.36;04070+3.1.3.36
ENSONIG00000005552	serpin family I member 1	serpini1	436.187	363.761	1.19897	0.261794	8.63598	8.68318	0.0032116	0.133994	1	protein_coding	ZDB-GENE-060503-390	100697232	I3JDN9	GO:0005615	extracellular space	cellular_component	PTHR11461_SF50	NEUROSERPIN PRECURSOR PEPTIDASE INHIBITOR 12 PI 12 SERINE PROTEASE INHIBITOR 17 SERPIN I1	GO:0005575;GO:0005615	cellular_component;extracellular space
ENSONIG00000006269	protein YIPF1	yipf2	42.9384	34.3882	1.2478	0.319389	5.24106	8.6875	0.00320399	0.133994	1	protein_coding	ZDB-GENE-040724-124	100690375	I3JGA7	GO:0016192;GO:0005794;GO:0016020;GO:0016021	vesicle-mediated transport;Golgi apparatus;membrane;integral component of membrane	biological_process;cellular_component	PTHR12822	YIP1 FAMILY MEMBER	GO:0005575;GO:0043226;GO:0005794;GO:0006810;GO:0016192	cellular_component;organelle;Golgi apparatus;transport;vesicle-mediated transport
ENSONIG00000012771	vitamin K epoxide reductase complex subunit 1 like 1	vkorc1l1	26.4543	36.6966	-1.38226	-0.46703	5.01118	8.69904	0.00318377	0.133994	1	protein_coding	ZDB-GENE-050522-210	100705457	I3K4N2	GO:0016020;GO:0016021	membrane;integral component of membrane	cellular_component	PTHR14519_SF1	VITAMIN K EPOXIDE REDUCTASE COMPLEX SUBUNIT 1 1 VKORC1 1 EC_1.17.4.4	GO:0005575	cellular_component
ENSONIG00000017364	activin A receptor type 2Ba	acvr2ba	4.10394	6.44978	-1.57234	-0.652911	2.38531	8.69006	0.00319949	0.133994	1	protein_coding	ZDB-GENE-980526-549			GO:0007178;GO:0004675;GO:0006468;GO:0004672;GO:0005524;GO:0016020;GO:0016021;GO:0016740;GO:0000166;GO:0004674;GO:0016301;GO:0016310;GO:0046872;GO:0001501;GO:0001755;GO:0030902;GO:0051216	transmembrane receptor protein serine/threonine kinase signaling pathway;transmembrane receptor protein serine/threonine kinase activity;protein phosphorylation;protein kinase activity;ATP binding;membrane;integral component of membrane;transferase activity;nucleotide binding;protein serine/threonine kinase activity;kinase activity;phosphorylation;metal ion binding;skeletal system development;neu…	biological_process;molecular_function;cellular_component	PTHR23255_SF57	ACTIVIN RECEPTOR TYPE 2B PRECURSOR EC_2.7.11.30 ACTIVIN RECEPTOR TYPE IIB ACTR IIB	GO:0005575;GO:0003674;GO:0043167;GO:0016301;GO:0006464;GO:0007165;GO:0048856;GO:0048870;GO:0040011	cellular_component;molecular_function;ion binding;kinase activity;cellular protein modification process;signal transduction;anatomical structure development;cell motility;locomotion
ENSONIG00000020629	cannabinoid receptor 1	CNR1 (1 of many)	42.6141	32.8455	1.29843	0.376773	5.24748	8.70268	0.00317742	0.133994	1	protein_coding			I3KXT8	GO:0016021;GO:0007186;GO:0004930;GO:0004949;GO:0016020;GO:0007165;GO:0038171	integral component of membrane;G protein-coupled receptor signaling pathway;G protein-coupled receptor activity;cannabinoid receptor activity;membrane;signal transduction;cannabinoid signaling pathway	cellular_component;biological_process;molecular_function	PTHR22750	MELANOCYTE STIMULATING HORMONE RECEPTOR MSH R MELANOCORTIN RECEPTOR 1 MC1 R	GO:0003674;GO:0007165;GO:0005575	molecular_function;signal transduction;cellular_component
ENSONIG00000022316			2.51194	4.44594	-1.74096	-0.799887	1.79369	8.69981	0.00318244	0.133994	1	lincRNA
ENSONIG00000006635			2.76952	0.440732	6.14957	2.62049	0.367824	8.67842	0.00322001	0.134028	1	protein_coding				GO:0004866;GO:0005615;GO:0010951	endopeptidase inhibitor activity;extracellular space;negative regulation of endopeptidase activity	molecular_function;cellular_component;biological_process	PTHR11412_SF88	ALPHA 2 MACROGLOBULIN	GO:0005575;GO:0005615;GO:0003674;GO:0030234	cellular_component;extracellular space;molecular_function;enzyme regulator activity
ENSONIG00000016817	signal transducer and activator of transcription 4	stat4	4.876	8.75409	-1.80723	-0.85378	2.72914	8.67162	0.00323204	0.134213	1	protein_coding	ZDB-GENE-030616-264	100711701	I3KJ95	GO:0045944;GO:0003700;GO:0005634;GO:0006355;GO:0003677;GO:0007165;GO:0019221;GO:0005737	positive regulation of transcription by RNA polymerase II;DNA-binding transcription factor activity;nucleus;regulation of transcription, DNA-templated;DNA binding;signal transduction;cytokine-mediated signaling pathway;cytoplasm	biological_process;molecular_function;cellular_component	PTHR11801	SIGNAL TRANSDUCER AND ACTIVATOR OF TRANSCRIPTION	GO:0007165;GO:0003674;GO:0003677;GO:0005575;GO:0043226;GO:0005634;GO:0003700;GO:0005737	signal transduction;molecular_function;DNA binding;cellular_component;organelle;nucleus;DNA-binding transcription factor activity;cytoplasm
ENSONIG00000008356	amyloid beta (A4) precursor protein-binding, family A, member 2a	apba2a	30.4576	23.5641	1.28908	0.366338	4.74713	8.65665	0.0032587	0.135003	1	protein_coding	ZDB-GENE-121107-1			GO:0007268;GO:0008021;GO:0005515;GO:0001540	chemical synaptic transmission;synaptic vesicle;protein binding;amyloid-beta binding	biological_process;cellular_component;molecular_function	PTHR12345_SF12	AMYLOID BETA A4 PRECURSOR BINDING FAMILY A MEMBER 2 ADAPTER X11BETA NEURON SPECIFIC X11L NEURONAL MUNC18 1 INTERACTING 2 MINT 2	GO:0003674;GO:0005575;GO:0043226;GO:0031410;GO:0007267	molecular_function;cellular_component;organelle;cytoplasmic vesicle;cell-cell signaling
ENSONIG00000001933	dynamin 2	dnm2a	15.0181	21.5913	-1.43314	-0.519179	4.17066	8.64312	0.003283	0.135073	1	protein_coding	ZDB-GENE-050913-84	100710480	I3J0N2	GO:0005874;GO:0006897;GO:0003924;GO:0005525;GO:0000166;GO:0043009;GO:0060026;GO:0061053;GO:0061061	microtubule;endocytosis;GTPase activity;GTP binding;nucleotide binding;chordate embryonic development;convergent extension;somite development;muscle structure development	cellular_component;biological_process;molecular_function	PTHR11566_SF23	DYNAMIN 2 EC_3.6.5.5	GO:0003674;GO:0043167;GO:0003924;GO:0006810;GO:0016192;GO:0005575;GO:0048856;GO:0009790	molecular_function;ion binding;GTPase activity;transport;vesicle-mediated transport;cellular_component;anatomical structure development;embryo development
ENSONIG00000004139	serpin family F member 1	serpinf1	56.5157	101.283	-1.79088	-0.840672	6.31473	8.64328	0.00328269	0.135073	1	protein_coding	ZDB-GENE-040912-2	100690960	I3J8M5	GO:0005615	extracellular space	cellular_component	PTHR11461_SF84	PIGMENT EPITHELIUM DERIVED FACTOR PRECURSOR PEDF SERPIN F1	GO:0005575;GO:0005615	cellular_component;extracellular space
ENSONIG00000010005	LSM6 homolog, U6 small nuclear RNA and mRNA degradation associated	lsm6	22.2052	37.1446	-1.6703	-0.740104	5.10122	8.64231	0.00328444	0.135073	1	protein_coding	ZDB-GENE-040625-50	100711394	I3JUN7	GO:0005732;GO:0000398;GO:0005634;GO:0003723;GO:0006397;GO:0008380;GO:0005681	small nucleolar ribonucleoprotein complex;mRNA splicing, via spliceosome;nucleus;RNA binding;mRNA processing;RNA splicing;spliceosomal complex	cellular_component;biological_process;molecular_function	PTHR11021_SF1	U6 SNRNA ASSOCIATED SM LSM6	GO:0034641;GO:0006397;GO:0032991;GO:0005575;GO:0043226;GO:0005634;GO:0003674;GO:0003723	cellular nitrogen compound metabolic process;mRNA processing;protein-containing complex;cellular_component;organelle;nucleus;molecular_function;RNA binding
ENSONIG00000024356			0.47864	1.30864	-2.66254	-1.41281	-0.228388	8.63873	0.00329091	0.135073	1	lincRNA
ENSONIG00000008040	formin 2b	fmn2b	28.7865	38.61	-1.33877	-0.420911	5.04685	8.6136	0.00333663	0.136632	1	protein_coding	ZDB-GENE-080225-35						PTHR23213_SF207	AMBIGUOUS
ENSONIG00000016264	ATP synthase subunit d, mitochondrial		93.9861	126.679	-1.34699	-0.429737	6.89619	8.60314	0.00335585	0.137101	1	protein_coding		100697434	I3KH79	GO:0000276;GO:0015986;GO:0015078;GO:0016020;GO:0006811;GO:0005739;GO:0005743	mitochondrial proton-transporting ATP synthase complex, coupling factor F(o);ATP synthesis coupled proton transport;proton transmembrane transporter activity;membrane;ion transport;mitochondrion;mitochondrial inner membrane	cellular_component;biological_process;molecular_function	PTHR12700	ATP SYNTHASE SUBUNIT D MITOCHONDRIAL	GO:0022857;GO:0003674;GO:0009058;GO:0044281;GO:0006810;GO:0034641;GO:0055085;GO:0032991;GO:0005575;GO:0043226;GO:0005739	transmembrane transporter activity;molecular_function;biosynthetic process;small molecule metabolic process;transport;cellular nitrogen compound metabolic process;transmembrane transport;protein-containing complex;cellular_component;organelle;mitochondrion
ENSONIG00000007226	catenin beta 1	ctnnb1	575.089	476.023	1.20792	0.272527	9.03521	8.59463	0.00337155	0.137426	1	protein_coding	ZDB-GENE-980526-362	100690187	I3JJR7	GO:0045296;GO:0007155;GO:0005515	cadherin binding;cell adhesion;protein binding	molecular_function;biological_process	PTHR23315_SF53	CATENIN BETA BETA CATENIN	GO:0003674;GO:0007155	molecular_function;cell adhesion
ENSONIG00000007536			39.2983	24.7116	1.59289	0.671648	5.10861	8.59034	0.00337951	0.137433	1	protein_coding				GO:0005515;GO:0016020;GO:0016021	protein binding;membrane;integral component of membrane	molecular_function;cellular_component	PTHR24100_SF15	BUTYROPHILIN SUBFAMILY MEMBER	GO:0003674;GO:0005575	molecular_function;cellular_component
ENSONIG00000006482	calcium voltage-gated channel auxiliary subunit gamma 5	cacng5a	150.575	113.682	1.32441	0.405351	7.02477	8.5786	0.00340137	0.137694	1	protein_coding	ZDB-GENE-120104-4	100696764	I3JH29	GO:0006816;GO:0016021;GO:0016020;GO:0005244;GO:0006811;GO:0034765;GO:0005262;GO:0070588	calcium ion transport;integral component of membrane;membrane;voltage-gated ion channel activity;ion transport;regulation of ion transmembrane transport;calcium channel activity;calcium ion transmembrane transport	biological_process;cellular_component;molecular_function	PTHR12107	VOLTAGE DEPENDENT CALCIUM CHANNEL GAMMA SUBUNIT NEURONAL VOLTAGE GATED CALCIUM CHANNEL GAMMA SUBUNIT TRANSMEMBRANE AMPAR REGULATORY GAMMA TARP GAMMA	GO:0005575;GO:0006810;GO:0022857;GO:0003674;GO:0055085	cellular_component;transport;transmembrane transporter activity;molecular_function;transmembrane transport
ENSONIG00000018164	uncharacterized protein C16orf45		83.8487	67.3007	1.24578	0.317047	6.24649	8.57854	0.00340148	0.137694	1	protein_coding		100703987	I3KP39				PTHR22704	UNCHARACTERIZED
ENSONIG00000012631	NADH:ubiquinone oxidoreductase subunit A7	ndufa7	25.4869	35.0931	-1.37432	-0.458714	5.0581	8.57005	0.00341738	0.138022	1	protein_coding	ZDB-GENE-040801-169	100691549	I3K453	GO:0005743;GO:0008137;GO:0042773	mitochondrial inner membrane;NADH dehydrogenase (ubiquinone) activity;ATP synthesis coupled electron transport	cellular_component;molecular_function;biological_process	PTHR12485	NADH DEHYDROGENASE [UBIQUINONE] 1 ALPHA SUBCOMPLEX SUBUNIT 7 COMPLEX I B14 5A CI B14 5A NADH UBIQUINONE OXIDOREDUCTASE SUBUNIT B14 5A	GO:0005575;GO:0044281;GO:0006091;GO:0034641	cellular_component;small molecule metabolic process;generation of precursor metabolites and energy;cellular nitrogen compound metabolic process
ENSONIG00000001081	NFKB inhibitor interacting Ras like 2	nkiras2	128.343	104.606	1.22721	0.295379	6.89287	8.56502	0.00342682	0.138074	1	protein_coding	ZDB-GENE-040801-166	100691521	I3IXN1	GO:0003924;GO:0005525;GO:0007165;GO:0016020;GO:0000166	GTPase activity;GTP binding;signal transduction;membrane;nucleotide binding	molecular_function;biological_process;cellular_component	PTHR24070_SF236	NF KAPPA B INHIBITOR INTERACTING RAS 2 I KAPPA B INTERACTING RAS 2 KAPPA B RAS 2 KAPPAB RAS2	GO:0005575;GO:0007165;GO:0003674;GO:0043167;GO:0003924	cellular_component;signal transduction;molecular_function;ion binding;GTPase activity
ENSONIG00000007498	beta-enolase	eno3	27.8611	38.0603	-1.36796	-0.452024	5.06371	8.5528	0.0034499	0.138074	1	protein_coding	ZDB-GENE-031006-5	100699677	I3JKR2	GO:0000015;GO:0004634;GO:0000287;GO:0006096	phosphopyruvate hydratase complex;phosphopyruvate hydratase activity;magnesium ion binding;glycolytic process	cellular_component;molecular_function;biological_process	PTHR11902	ENOLASE EC_4.2.1.11 2 PHOSPHO D GLYCERATE HYDRO LYASE 2 PHOSPHOGLYCERATE DEHYDRATASE	GO:0009058;GO:0044281;GO:0005975;GO:0009056;GO:0006091;GO:0034641;GO:0051186;GO:0034655;GO:0003674;GO:0043167;GO:0016829;GO:0032991;GO:0005575	biosynthetic process;small molecule metabolic process;carbohydrate metabolic process;catabolic process;generation of precursor metabolites and energy;cellular nitrogen compound metabolic process;cofactor metabolic process;nucleobase-containing compound catabolic process;molecular_function;ion binding;lyase activity;protein-containing complex;cellular_component	00010+4.2.1.11;00680+4.2.1.11
ENSONIG00000017290	RNA polymerase II subunit D	polr2d	11.4748	15.9976	-1.3875	-0.47249	3.92589	8.55351	0.00344856	0.138074	1	protein_coding	ZDB-GENE-040714-2	100711617	I3KL11	GO:0044237;GO:0000166;GO:0006352;GO:0003824;GO:0030880	cellular metabolic process;nucleotide binding;DNA-templated transcription, initiation;catalytic activity;RNA polymerase complex	biological_process;molecular_function;cellular_component	PTHR21297_SF0	DNA DIRECTED RNA POLYMERASE II SUBUNIT RPB4 RNA POLYMERASE II SUBUNIT B4 DNA DIRECTED RNA POLYMERASE II SUBUNIT D	GO:0003674;GO:0009058;GO:0034641;GO:0032991;GO:0005575	molecular_function;biosynthetic process;cellular nitrogen compound metabolic process;protein-containing complex;cellular_component
ENSONIG00000019686	potassium channel tetramerization domain containing 17	kctd17	17.3795	25.0893	-1.44227	-0.52834	4.37548	8.5581	0.00343989	0.138074	1	protein_coding	ZDB-GENE-130531-80			GO:0051260;GO:0005515	protein homooligomerization;protein binding	biological_process;molecular_function	PTHR14958_SF23	POTASSIUM CHANNEL TETRAMERISATION DOMAIN CONTAINING 17	GO:0003674;GO:0022607;GO:0065003	molecular_function;cellular component assembly;protein-containing complex assembly
ENSONIG00000008347	CD9 antigen		202.872	149.763	1.35519	0.438494	7.5415	8.54812	0.0034588	0.138118	2	protein_coding		100694046	I3JNQ1;I3JNQ0	GO:0016021;GO:0016020	integral component of membrane;membrane	cellular_component	PTHR19282_SF163	CD9 ANTIGEN CD9 ANTIGEN	GO:0005575	cellular_component
ENSONIG00000002813	AKT interacting protein	aktip	86.8584	44.1256	1.96826	0.976923	6.1074	8.53874	0.00347667	0.138519	1	protein_coding	ZDB-GENE-030909-5	100702142	I3J3T7				PTHR24067_SF41	CROSSBRONX
ENSONIG00000019675	transmembrane protein 184bb	tmem184bb	87.0855	66.5801	1.3062	0.385379	6.29582	8.53429	0.00348516	0.138545	1	protein_coding	ZDB-GENE-070705-124			GO:0016020;GO:0016021	membrane;integral component of membrane	cellular_component	PTHR23423_SF20	TRANSMEMBRANE	GO:0005575	cellular_component
ENSONIG00000000046	R-spondin 2	rspo2	8.04718	4.80094	1.6724	0.741917	2.77876	8.52374	0.00350544	0.138949	2	protein_coding	ZDB-GENE-060503-667	100691669	I3ITW7;I3ITW6	GO:0001501;GO:0033335;GO:0033336;GO:0033337;GO:0033338;GO:0033339;GO:0033340	skeletal system development;anal fin development;caudal fin development;dorsal fin development;medial fin development;pectoral fin development;pelvic fin development	biological_process	PTHR23275_SF2	R SPONDIN 2 PRECURSOR ROOF PLATE SPECIFIC SPONDIN 2	GO:0048856	anatomical structure development
ENSONIG00000004915			42.0228	60.7961	-1.44571	-0.531774	5.48578	8.52084	0.00351102	0.138949	1	protein_coding				GO:0005891;GO:0070588;GO:0005245;GO:0005216;GO:0006811;GO:0055085;GO:0016020;GO:0016021;GO:0005244;GO:0034765;GO:0005262;GO:0006816	voltage-gated calcium channel complex;calcium ion transmembrane transport;voltage-gated calcium channel activity;ion channel activity;ion transport;transmembrane transport;membrane;integral component of membrane;voltage-gated ion channel activity;regulation of ion transmembrane transport;calcium channel activity;calcium ion transport	cellular_component;biological_process;molecular_function	PTHR10037_SF161	VOLTAGE DEPENDENT N TYPE CALCIUM CHANNEL SUBUNIT ALPHA 1B BRAIN CALCIUM CHANNEL III BIII CALCIUM CHANNEL L TYPE ALPHA 1 POLYPEPTIDE 5 VOLTAGE GATED CALCIUM CHANNEL SUBUNIT ALPHA CAV2 2	GO:0005575;GO:0006810;GO:0055085;GO:0022857;GO:0003674;GO:0032991	cellular_component;transport;transmembrane transport;transmembrane transporter activity;molecular_function;protein-containing complex
ENSONIG00000009737	SS18, nBAF chromatin remodeling complex subunit	ss18	554.486	456.483	1.21452	0.280392	8.97751	8.51361	0.00352501	0.139191	2	protein_coding	ZDB-GENE-030131-4867	100703494	I3JTN3;I3JTN4	GO:0003713;GO:1903508	transcription coactivator activity;positive regulation of nucleic acid-templated transcription	molecular_function;biological_process	PTHR23107_SF2	SSXT SYT SYNOVIAL SARCOMA	GO:0003674	molecular_function
ENSONIG00000001011			9.6898	24.0411	-2.48483	-1.31314	3.91428	8.5088	0.00353434	0.139248	1	protein_coding				GO:0003676;GO:0090305;GO:0016787;GO:0004518;GO:0004519	nucleic acid binding;nucleic acid phosphodiester bond hydrolysis;hydrolase activity;nuclease activity;endonuclease activity	molecular_function;biological_process			GO:0003674;GO:0034641;GO:0004518	molecular_function;cellular nitrogen compound metabolic process;nuclease activity
ENSONIG00000015641	SH3 and multiple ankyrin repeat domains 2a	shank2a	45.878	70.058	-1.52556	-0.609335	5.78657	8.50207	0.00354742	0.139453	1	protein_coding	ZDB-GENE-120215-55			GO:0005515	protein binding	molecular_function	PTHR24135	SH3 AND MULTIPLE ANKYRIN REPEAT DOMAINS PROLINE RICH SYNAPSE ASSOCIATED	GO:0003674	molecular_function
ENSONIG00000008316	toll interacting protein	tollip	121.48	93.4315	1.29888	0.377268	6.75732	8.49406	0.00356308	0.139758	1	protein_coding	ZDB-GENE-030131-8820	100711534	I3JNL7	GO:0005515	protein binding	molecular_function	PTHR16461_SF5	TOLL INTERACTING	GO:0003674	molecular_function
ENSONIG00000014858			0.884733	2.13739	-2.42598	-1.27857	0.825915	8.48806	0.00357485	0.13991	1	protein_coding				GO:0001518;GO:0006814;GO:0005216;GO:0006811;GO:0055085;GO:0016020;GO:0005248;GO:0016021;GO:0034220;GO:0035725	voltage-gated sodium channel complex;sodium ion transport;ion channel activity;ion transport;transmembrane transport;membrane;voltage-gated sodium channel activity;integral component of membrane;ion transmembrane transport;sodium ion transmembrane transport	cellular_component;biological_process;molecular_function	PTHR10037_SF186	SODIUM CHANNEL TYPE 4 SUBUNIT ALPHA B VOLTAGE GATED SODIUM CHANNEL SUBUNIT ALPHA NAV1 4B	GO:0005575;GO:0006810;GO:0055085;GO:0022857;GO:0003674;GO:0032991	cellular_component;transport;transmembrane transport;transmembrane transporter activity;molecular_function;protein-containing complex
ENSONIG00000001195	DEAD-box helicase 43	ddx43	0.66646	1.94422	-2.90645	-1.53926	0.358892	8.48207	0.00358663	0.140061	2	protein_coding	ZDB-GENE-080204-77	100708493	I3IY20;I3IY21	GO:0003723;GO:0005524;GO:0003676;GO:0000166;GO:0016787;GO:0004386	RNA binding;ATP binding;nucleic acid binding;nucleotide binding;hydrolase activity;helicase activity	molecular_function	PTHR24031_SF207	ATP DEPENDENT RNA HELICASE	GO:0003674;GO:0043167;GO:0003723;GO:0004386	molecular_function;ion binding;RNA binding;helicase activity
ENSONIG00000025250			5.10904	9.30158	-1.81663	-0.861268	2.97103	8.47415	0.00360228	0.140362	2	lincRNA
ENSONIG00000009869			12.7211	6.51163	1.94949	0.9631	3.15352	8.46579	0.00361889	0.140699	4	protein_coding				GO:0005515;GO:0000166;GO:0005524	protein binding;nucleotide binding;ATP binding	molecular_function	PTHR24106_SF58	AMBIGUOUS	GO:0003674;GO:0043167	molecular_function;ion binding
ENSONIG00000015949	WD repeat domain 54	wdr54	37.2123	28.5401	1.3023	0.38106	5.06879	8.45048	0.00364946	0.141577	1	protein_coding	ZDB-GENE-040801-151	100703656	I3KG43	GO:0005515	protein binding	molecular_function	PTHR22844_SF30	WD REPEAT	GO:0003674	molecular_function
ENSONIG00000021094	D(1)-like dopamine receptor	drd1b	9.81256	6.61593	1.47962	0.565231	3.02572	8.42089	0.00370935	0.143585	1	protein_coding	ZDB-GENE-070524-2	100693077	I3KZ49	GO:0005887;GO:0016021;GO:0007186;GO:0004930;GO:0004952;GO:0007189;GO:0042311;GO:0016020;GO:0007165;GO:0007212	integral component of plasma membrane;integral component of membrane;G protein-coupled receptor signaling pathway;G protein-coupled receptor activity;dopamine neurotransmitter receptor activity;adenylate cyclase-activating G protein-coupled receptor signaling pathway;vasodilation;membrane;signal transduction;dopamine receptor signaling pathway	cellular_component;biological_process;molecular_function	PTHR24249_SF221	D 1A DOPAMINE RECEPTOR DOPAMINE D1 RECEPTOR	GO:0003674;GO:0007165;GO:0005575;GO:0003013	molecular_function;signal transduction;cellular_component;circulatory system process
ENSONIG00000024417			12.6641	8.86111	1.43058	0.516605	3.58952	8.40569	0.00374047	0.144474	2	lincRNA
ENSONIG00000003658	radical S-adenosyl methionine domain containing 2	rsad2	8.14597	3.02201	2.70582	1.43607	2.47885	8.39536	0.00376181	0.144981	1	protein_coding	ZDB-GENE-050913-129			GO:0051536;GO:0003824;GO:0009615	iron-sulfur cluster binding;catalytic activity;response to virus	molecular_function;biological_process	PTHR21339	RADICAL S ADENOSYL METHIONINE DOMAIN CONTAINING 2 VIPERIN VIRUS INHIBITORY PROTEIN ENDOPLASMIC RETICULUM ASSOCIATED INTERFERON INDUCIBLE	GO:0003674	molecular_function
ENSONIG00000003248	proteasome subunit beta 3	psmb3	63.5939	81.5358	-1.28143	-0.357759	6.2441	8.38948	0.00377399	0.145135	1	protein_coding	ZDB-GENE-040426-2682	100701559	I3J5E0	GO:0004175;GO:0005839;GO:0051603;GO:0004298;GO:0043161;GO:0019774;GO:0005634;GO:0005737;GO:0008233;GO:0016787;GO:0006508;GO:0000502	endopeptidase activity;proteasome core complex;proteolysis involved in cellular protein catabolic process;threonine-type endopeptidase activity;proteasome-mediated ubiquitin-dependent protein catabolic process;proteasome core complex, beta-subunit complex;nucleus;cytoplasm;peptidase activity;hydrolase activity;proteolysis;proteasome complex	molecular_function;cellular_component;biological_process	PTHR11599_SF49	PROTEASOME SUBUNIT BETA TYPE 3 EC_3.4.25.1 PROTEASOME CHAIN 13 PROTEASOME COMPONENT C10 II PROTEASOME THETA CHAIN	GO:0032991;GO:0005575;GO:0008233;GO:0009056;GO:0043226;GO:0005634;GO:0005737	protein-containing complex;cellular_component;peptidase activity;catabolic process;organelle;nucleus;cytoplasm
ENSONIG00000003671	dynein light chain Tctex-type 1	dynlt3 (1 of many)	59.9151	74.9121	-1.24882	-0.320566	6.15336	8.37309	0.00380818	0.145218	1	protein_coding	ZDB-GENE-040927-24	100705970	I3J6X9				PTHR21255_SF20	DYNEIN LIGHT CHAIN TCTEX TYPE 3 T COMPLEX ASSOCIATED TESTIS EXPRESSED 1
ENSONIG00000004146	GTPase IMAP family member 4		6.20814	3.36345	1.85633	0.892454	2.2848	8.3727	0.00380898	0.145218	1	protein_coding		100697299	I3J8N3	GO:0005525;GO:0016020;GO:0016021	GTP binding;membrane;integral component of membrane	molecular_function;cellular_component	PTHR10903_SF29	UNCHARACTERIZED	GO:0003674;GO:0043167;GO:0005575	molecular_function;ion binding;cellular_component
ENSONIG00000007195	protein bicaudal D homolog 2	bicd2	51.9428	37.875	1.37076	0.454976	5.49311	8.37925	0.00379529	0.145218	1	protein_coding	ZDB-GENE-120717-1	100693219	I3JJN1	GO:0008093;GO:0070840	cytoskeletal adaptor activity;dynein complex binding	molecular_function	PTHR31233	BICAUDAL D HOMOLOG BIC D	GO:0003674;GO:0008092;GO:0030674	molecular_function;cytoskeletal protein binding;protein binding, bridging
ENSONIG00000018962	cellular tumor antigen p53	tp53	40.8883	53.1425	-1.30381	-0.382734	5.50247	8.38246	0.00378859	0.145218	1	protein_coding	ZDB-GENE-990415-270	100702587	I3KRX9	GO:0044212;GO:0051262;GO:0003700;GO:0005634;GO:0006355;GO:0003677;GO:0006915;GO:0005515;GO:0005737;GO:0046872;GO:0007049	transcription regulatory region DNA binding;protein tetramerization;DNA-binding transcription factor activity;nucleus;regulation of transcription, DNA-templated;DNA binding;apoptotic process;protein binding;cytoplasm;metal ion binding;cell cycle	molecular_function;biological_process;cellular_component	PTHR11447	CELLULAR TUMOR ANTIGEN P53 TUMOR SUPPRESSOR P53	GO:0003674;GO:0008219;GO:0003677;GO:0005575;GO:0043226;GO:0005634;GO:0003700;GO:0022607;GO:0065003;GO:0005737;GO:0043167;GO:0007049	molecular_function;cell death;DNA binding;cellular_component;organelle;nucleus;DNA-binding transcription factor activity;cellular component assembly;protein-containing complex assembly;cytoplasm;ion binding;cell cycle
ENSONIG00000004206	green-sensitive opsin		1.76533	0.740026	2.34674	1.23066	0.19834	8.36302	0.00382933	0.145417	1	protein_coding		100710942	F8TJW7	GO:0007601;GO:0016021;GO:0007186;GO:0004930;GO:0007602;GO:0016020;GO:0009881;GO:0007165;GO:0018298;GO:0050896	visual perception;integral component of membrane;G protein-coupled receptor signaling pathway;G protein-coupled receptor activity;phototransduction;membrane;photoreceptor activity;signal transduction;protein-chromophore linkage;response to stimulus	biological_process;cellular_component;molecular_function	PTHR24240	OPSIN	GO:0003674;GO:0007165;GO:0005575;GO:0050877;GO:0006464;GO:0008150	molecular_function;signal transduction;cellular_component;nervous system process;cellular protein modification process;biological_process
ENSONIG00000011045			7.76934	2.23331	3.48416	1.80081	2.31808	8.35461	0.00384711	0.145417	2	protein_coding			I3JYF3;I3JYF4	GO:0004842;GO:0016740;GO:0016567	ubiquitin-protein transferase activity;transferase activity;protein ubiquitination	molecular_function;biological_process	PTHR11254_SF294	PROBABLE E3 UBIQUITIN LIGASE HUL4 EC_2.3.2.26 HECT UBIQUITIN LIGASE 4 HECT TYPE E3 UBIQUITIN TRANSFERASE HUL4	GO:0006464	cellular protein modification process
ENSONIG00000018229	autophagy/beclin-1 regulator 1b	ambra1b	14.9395	20.5143	-1.36733	-0.451357	4.15899	8.35634	0.00384343	0.145417	1	protein_coding	ZDB-GENE-050208-235			GO:0005515;GO:0007626;GO:0043009;GO:0048741	protein binding;locomotory behavior;chordate embryonic development;skeletal muscle fiber development	molecular_function;biological_process	PTHR22874	ACTIVATING MOLECULE IN BECN1 REGULATED AUTOPHAGY 1	GO:0003674;GO:0048856;GO:0009790	molecular_function;anatomical structure development;embryo development
ENSONIG00000019181			0.535843	1.23814	-2.26214	-1.17769	-0.0439958	8.3564	0.00384332	0.145417	1	protein_coding				GO:0005515;GO:0000166;GO:0005524	protein binding;nucleotide binding;ATP binding	molecular_function	PTHR24106_SF58	AMBIGUOUS	GO:0003674;GO:0043167	molecular_function;ion binding
ENSONIG00000006567	NADH:ubiquinone oxidoreductase subunit A3	ndufa3	30.0789	43.3966	-1.4411	-0.527171	5.34456	8.34468	0.00386818	0.145902	1	protein_coding	ZDB-GENE-040801-18	100710259	I3JHE1	GO:0005743;GO:0005747;GO:0016020;GO:0016021	mitochondrial inner membrane;mitochondrial respiratory chain complex I;membrane;integral component of membrane	cellular_component	PTHR15221	NADH DEHYDROGENASE [UBIQUINONE] 1 ALPHA SUBCOMPLEX SUBUNIT 3 COMPLEX I B9 CI B9 NADH UBIQUINONE OXIDOREDUCTASE B9 SUBUNIT	GO:0005575;GO:0032991	cellular_component;protein-containing complex
ENSONIG00000003098	ADP-ribosylation factor-like protein 6	arl6	57.4257	45.7458	1.25701	0.329991	5.75152	8.31842	0.00392451	0.146775	2	protein_coding	ZDB-GENE-041219-2	100696267	I3J4U2;I3J4U1	GO:0005525;GO:0000166;GO:0007368;GO:0007369;GO:0007601;GO:0008593;GO:0032402;GO:0033339;GO:0060271;GO:0070121	GTP binding;nucleotide binding;determination of left/right symmetry;gastrulation;visual perception;regulation of Notch signaling pathway;melanosome transport;pectoral fin development;cilium assembly;Kupffer's vesicle development	molecular_function;biological_process	PTHR11711_SF21	ADP RIBOSYLATION FACTOR 6	GO:0003674;GO:0043167;GO:0050877;GO:0006810;GO:0048856;GO:0022607	molecular_function;ion binding;nervous system process;transport;anatomical structure development;cellular component assembly
ENSONIG00000005381			0.458539	3.60112	-7.83991	-2.97084	0.940393	8.32397	0.00391253	0.146775	2	protein_coding							TF644985	CHAIN
ENSONIG00000010262			1.99123	4.65954	-2.32179	-1.21523	1.7061	8.32307	0.00391446	0.146775	1	protein_coding				GO:0008236;GO:0006508	serine-type peptidase activity;proteolysis	molecular_function;biological_process	PTHR12277_SF52	ALPHA/BETA HYDROLASE DOMAIN CONTAINING 17A ABHYDROLASE DOMAIN CONTAINING 17A EC_3.1.2.22	GO:0008233	peptidase activity
ENSONIG00000024636			2.47372	4.68148	-1.87179	-0.904417	1.79534	8.3205	0.00392002	0.146775	3	lincRNA
ENSONIG00000006064	macoilin-1	si:dkey-12h9.6	131.09	106.565	1.22989	0.298532	6.88285	8.30109	0.00396213	0.147248	2	protein_coding	ZDB-GENE-041001-145	100694684	I3JFJ7;I3JFJ6	GO:0016021;GO:0016020	integral component of membrane;membrane	cellular_component	PTHR13289	MACOILIN TRANSMEMBRANE	GO:0005575	cellular_component
ENSONIG00000012560			27.2244	21.2005	1.28502	0.361791	4.61577	8.30394	0.00395591	0.147248	1	protein_coding							PTHR15665	ASTEROID HOMOLOG 1
ENSONIG00000016422			60.6689	47.3889	1.27805	0.353947	5.74877	8.30314	0.00395766	0.147248	1	protein_coding				GO:0003676	nucleic acid binding	molecular_function	PTHR24409_SF19	ZINC FINGER	GO:0003674	molecular_function
ENSONIG00000006860	vacuolar protein sorting 13 homolog B	VPS13B	35.9002	49.1255	-1.36559	-0.449523	5.37263	8.29423	0.00397713	0.147496	1	protein_coding			I3JIG2				PTHR12517	VACUOLAR SORTING ASSOCIATED 13B COHEN SYNDROME 1
ENSONIG00000002428	ATP synthase F1 subunit delta	atp5f1d	117.523	150.72	-1.28158	-0.357926	7.16604	8.28552	0.00399624	0.147671	1	protein_coding	ZDB-GENE-030131-7649	100693673	I3J2E9	GO:0045261;GO:0015986;GO:0046933;GO:0099132	proton-transporting ATP synthase complex, catalytic core F(1);ATP synthesis coupled proton transport;proton-transporting ATP synthase activity, rotational mechanism;ATP hydrolysis coupled cation transmembrane transport	cellular_component;biological_process;molecular_function	PTHR13822	ATP SYNTHASE SUBUNIT DELTA MITOCHONDRIAL PRECURSOR F ATPASE DELTA SUBUNIT	GO:0022857;GO:0003674;GO:0016887;GO:0009058;GO:0044281;GO:0006810;GO:0034641;GO:0055085;GO:0032991;GO:0005575	transmembrane transporter activity;molecular_function;ATPase activity;biosynthetic process;small molecule metabolic process;transport;cellular nitrogen compound metabolic process;transmembrane transport;protein-containing complex;cellular_component
ENSONIG00000013840	synaptogyrin 1	syngr1b	101.796	83.1163	1.22458	0.292288	6.59098	8.28069	0.0040069	0.147671	1	protein_coding	ZDB-GENE-090624-2	102082341	I3K8F8	GO:0016020;GO:0016021	membrane;integral component of membrane	cellular_component	PTHR10838	SYNAPTOGYRIN	GO:0005575	cellular_component
ENSONIG00000025811			4.84333	7.48262	-1.52484	-0.608656	2.86675	8.28153	0.00400504	0.147671	1	lincRNA
ENSONIG00000003895	family with sequence similarity 163 member B	fam163ba	54.4531	43.0384	1.26255	0.336336	5.60449	8.27249	0.00402503	0.147957	1	protein_coding	ZDB-GENE-091204-96	100707886	I3J7R6	GO:0016020;GO:0016021	membrane;integral component of membrane	cellular_component	PTHR31396	UNKNOWN	GO:0005575	cellular_component
ENSONIG00000012867	zinc finger CCCH-type containing 12B	zc3h12b	17.7447	23.9546	-1.34752	-0.430305	4.3052	8.26962	0.0040314	0.147957	1	protein_coding	ZDB-GENE-060526-290			GO:0046872	metal ion binding	molecular_function	PTHR12876_SF27	PROBABLE RIBONUCLEASE Z B EC_3.1.-.- MCP INDUCED 2 ZINC FINGER CCCH DOMAIN CONTAINING 12B	GO:0003674;GO:0043167	molecular_function;ion binding
ENSONIG00000014633	trans-golgi network vesicle protein 23 homolog A	TVP23A	47.7438	57.8937	-1.21183	-0.277185	5.79245	8.25731	0.00405881	0.148348	1	protein_coding		100690443	I3KBC5	GO:0016021;GO:0016020	integral component of membrane;membrane	cellular_component	PTHR13019	GOLGI APPARATUS MEMBRANE TVP23	GO:0005575	cellular_component
ENSONIG00000020469	fukutin related protein	fkrp	21.3663	16.2035	1.31373	0.393666	4.23147	8.25896	0.00405514	0.148348	1	protein_coding	ZDB-GENE-070412-4	100691656	I3KXC8	GO:0001570;GO:0014706;GO:0030198;GO:0048747;GO:0060049	vasculogenesis;striated muscle tissue development;extracellular matrix organization;muscle fiber development;regulation of protein glycosylation	biological_process	PTHR13627	FUKUTIN RELATED EC_2.4.2.- RIBITOL 5 PHOSPHATE TRANSFERASE	GO:0030154;GO:0048856;GO:0030198	cell differentiation;anatomical structure development;extracellular matrix organization
ENSONIG00000007118	tight junction associated protein 1 (peripheral)	tjap1	4.07058	6.81303	-1.66157	-0.732551	2.46264	8.19842	0.00419269	0.152925	1	protein_coding	ZDB-GENE-081107-47			GO:0005923	bicellular tight junction	cellular_component	TF619843	TIGHT JUNCTION ASSOCIATED 1	GO:0005575	cellular_component
ENSONIG00000020481	linkage group 16 CXorf21 homolog	CXorf21	1.3686	0.529694	2.59193	1.37403	0.167321	8.18981	0.00421264	0.153337	1	protein_coding		100708008	I3KXE0				PTHR14889	UNCHARACTERIZED CXORF21
ENSONIG00000000452	serum/glucocorticoid regulated kinase 1	SGK1	147.094	177.691	-1.20832	-0.272998	7.33697	8.13134	0.00435067	0.154562	2	protein_coding		100698826	I3IVD4;I3IVD3	GO:0004674;GO:0006468;GO:0004672;GO:0005524;GO:0016740;GO:0000166;GO:0016301;GO:0016310	protein serine/threonine kinase activity;protein phosphorylation;protein kinase activity;ATP binding;transferase activity;nucleotide binding;kinase activity;phosphorylation	molecular_function;biological_process	PTHR24356_SF148	SERINE/THREONINE KINASE SGK1 EC_2.7.11.1 SERUM/GLUCOCORTICOID REGULATED KINASE 1	GO:0003674;GO:0043167;GO:0016301;GO:0006464	molecular_function;ion binding;kinase activity;cellular protein modification process
ENSONIG00000002546	NFKB activating protein	nkap	44.0281	56.7298	-1.28578	-0.362643	5.72882	8.13869	0.00433305	0.154562	2	protein_coding	ZDB-GENE-030131-8064	100693245	I3J2U6;I3J2U7	GO:0003682;GO:0045892;GO:0007219	chromatin binding;negative regulation of transcription, DNA-templated;Notch signaling pathway	molecular_function;biological_process	PTHR13087_SF0	NKAP FAMILY	GO:0007165;GO:0003674	signal transduction;molecular_function
ENSONIG00000003606	regulator of microtubule dynamics 1	rmdn1	57.1779	71.7853	-1.25538	-0.328123	6.07356	8.11284	0.00439527	0.154562	1	protein_coding	ZDB-GENE-070928-17	100704537	I3J6P4	GO:0005515	protein binding	molecular_function	PTHR16056	REGULATOR OF MICROTUBULE DYNAMICS RMD	GO:0003674	molecular_function
ENSONIG00000004109	mothers against decapentaplegic homolog 2		144.831	116.925	1.23888	0.30904	6.99449	8.11615	0.00438727	0.154562	2	protein_coding		100693777	I3J8I9;I3J8J0	GO:0007179;GO:0005667;GO:0005622;GO:0003700;GO:0006355;GO:0005515;GO:0003677;GO:0005634;GO:0005737	transforming growth factor beta receptor signaling pathway;transcription factor complex;intracellular;DNA-binding transcription factor activity;regulation of transcription, DNA-templated;protein binding;DNA binding;nucleus;cytoplasm	biological_process;cellular_component;molecular_function	PTHR13703_SF25	MOTHERS AGAINST DECAPENTAPLEGIC HOMOLOG 3 MAD HOMOLOG 3 MAD3 MOTHERS AGAINST DPP HOMOLOG 3 SMAD FAMILY MEMBER 3 SMAD 3 SMAD3	GO:0003674;GO:0003700;GO:0005575;GO:0005622;GO:0032991;GO:0007165;GO:0003677;GO:0043226;GO:0005634;GO:0005737	molecular_function;DNA-binding transcription factor activity;cellular_component;intracellular;protein-containing complex;signal transduction;DNA binding;organelle;nucleus;cytoplasm
ENSONIG00000004163	protein FAM122A		11.0605	15.5724	-1.40005	-0.485483	3.69362	8.12026	0.00437732	0.154562	1	protein_coding		102075861	I3J8Q2
ENSONIG00000005827	ADP ribosylation factor like GTPase 14 effector protein	arl14ep	127.957	106.031	1.20603	0.270268	6.85902	8.1383	0.00433398	0.154562	1	protein_coding	ZDB-GENE-060825-216	100702470	I3JEP8	GO:0003676;GO:0003677	nucleic acid binding;DNA binding	molecular_function	PTHR23080_SF72	ARL14 EFFECTOR ARF7 EFFECTOR	GO:0003674;GO:0003677	molecular_function;DNA binding
ENSONIG00000010471	Berardinelli-Seip congenital lipodystrophy 2 (seipin)	bscl2	17.383	12.6835	1.37008	0.454264	3.94631	8.13844	0.00433366	0.154562	1	protein_coding	ZDB-GENE-051113-140			GO:0019915;GO:0016020;GO:0016021	lipid storage;membrane;integral component of membrane	biological_process;cellular_component	PTHR21212	SEIPIN BERNARDINELLI SEIP CONGENITAL LIPODYSTROPHY TYPE 2	GO:0005575	cellular_component
ENSONIG00000010739	c-Maf inducing protein	cmip	48.2764	64.8886	-1.34193	-0.424307	5.81086	8.10961	0.00440311	0.154562	2	protein_coding	ZDB-GENE-050419-50						TF656897	C MAF INDUCING C MIP
ENSONIG00000011563	microsomal glutathione S-transferase 2	mgst2	6.59593	10.1133	-1.54486	-0.627476	3.22163	8.14518	0.00431758	0.154562	2	protein_coding	ZDB-GENE-060616-94		I3K0B8;I3K0B9	GO:0008047;GO:0016021;GO:0006691;GO:0016020;GO:0043085	enzyme activator activity;integral component of membrane;leukotriene metabolic process;membrane;positive regulation of catalytic activity	molecular_function;cellular_component;biological_process	PTHR10250_SF13	MICROSOMAL GLUTATHIONE S TRANSFERASE 2 MICROSOMAL GST 2 EC_2.5.1.18	GO:0005575;GO:0003674;GO:0030234;GO:0044281;GO:0008150	cellular_component;molecular_function;enzyme regulator activity;small molecule metabolic process;biological_process
ENSONIG00000011967	muskelin 1, intracellular mediator containing kelch motifs	mkln1	25.2349	38.3942	-1.51734	-0.601547	4.97824	8.10943	0.00440357	0.154562	1	protein_coding	ZDB-GENE-030131-3942			GO:0005515	protein binding	molecular_function	PTHR15526	MUSKELIN	GO:0003674	molecular_function
ENSONIG00000014986	UPF0577 protein KIAA1324-like	si:ch211-233h19.2	177.51	146.737	1.20932	0.2742	7.31732	8.15645	0.00429082	0.154562	1	protein_coding	ZDB-GENE-061009-14	100706359	I3KCM1	GO:0016020;GO:0016021	membrane;integral component of membrane	cellular_component	PTHR22727_SF3	PRECURSOR ESTROGEN INDUCED GENE 121	GO:0005575	cellular_component
ENSONIG00000015716	bolA-like protein 2	zgc:112271	16.3467	22.4336	-1.3716	-0.455858	4.38514	8.14368	0.00432116	0.154562	1	protein_coding	ZDB-GENE-050522-443	100706616	I3KF84				PTHR12735_SF2	BOLA
ENSONIG00000015863	ubiquitin specific peptidase 54b	usp54b	24.1743	31.753	-1.31165	-0.391382	4.76724	8.11676	0.00438579	0.154562	2	protein_coding	ZDB-GENE-090828-3			GO:0016579;GO:0036459	protein deubiquitination;thiol-dependent ubiquitinyl hydrolase activity	biological_process;molecular_function	PTHR22975_SF5	INACTIVE UBIQUITIN CARBOXYL TERMINAL HYDROLASE 54 INACTIVE UBIQUITIN SPECIFIC PEPTIDASE 54	GO:0006464	cellular protein modification process
ENSONIG00000017797	prefoldin subunit 1	pfdn1	34.5892	49.7647	-1.43587	-0.521927	5.54008	8.12639	0.00436254	0.154562	1	protein_coding	ZDB-GENE-050306-50	100694901	I3KMU0	GO:0006457;GO:0051082;GO:0016272	protein folding;unfolded protein binding;prefoldin complex	biological_process;molecular_function;cellular_component	PTHR20903_SF0	PREFOLDIN SUBUNIT 1	GO:0003674;GO:0051082;GO:0006457;GO:0032991;GO:0005575	molecular_function;unfolded protein binding;protein folding;protein-containing complex;cellular_component
ENSONIG00000020137	inositol-tetrakisphosphate 1-kinase	itpk1b	140.985	113.804	1.23808	0.3081	7.00346	8.1106	0.00440072	0.154562	1	protein_coding	ZDB-GENE-131126-72	100698428	I3KW72	GO:0000287;GO:0005622;GO:0005524;GO:0046872;GO:0047325;GO:0052725;GO:0052726;GO:0032957;GO:0016740;GO:0000166;GO:0016301;GO:0016310	magnesium ion binding;intracellular;ATP binding;metal ion binding;inositol tetrakisphosphate 1-kinase activity;inositol-1,3,4-trisphosphate 6-kinase activity;inositol-1,3,4-trisphosphate 5-kinase activity;inositol trisphosphate metabolic process;transferase activity;nucleotide binding;kinase activity;phosphorylation	molecular_function;cellular_component;biological_process	PTHR14217	UNKNOWN	GO:0003674;GO:0043167;GO:0005575;GO:0005622;GO:0016301;GO:0044281	molecular_function;ion binding;cellular_component;intracellular;kinase activity;small molecule metabolic process	00562+2.7.1.134+2.7.1.159;04070+2.7.1.159
ENSONIG00000021870			5.60658	8.5551	-1.52368	-0.607561	2.7061	8.15245	0.00430029	0.154562	1	miRNA
ENSONIG00000024226			3.98559	1.38056	2.86126	1.51665	1.29257	8.16339	0.00427445	0.154562	2	lincRNA
ENSONIG00000025768			72.6953	93.0973	-1.28126	-0.357566	6.51273	8.14274	0.0043234	0.154562	3	lincRNA
ENSONIG00000015328	low density lipoprotein receptor adapter protein 1	si:dkey-71h2.2	87.8492	70.1145	1.2534	0.325843	6.20748	8.10543	0.00441329	0.154596	1	protein_coding	ZDB-GENE-041014-145	100692480	I3KDU1	GO:0005515	protein binding	molecular_function	PTHR11232_SF38	LOW DENSITY LIPOPROTEIN RECEPTOR ADAPTER 1 FRAGMENT	GO:0003674	molecular_function
ENSONIG00000002222	phosphatidylinositol glycan anchor biosynthesis, class T	pigt	31.3325	24.5474	1.27774	0.353596	4.81538	8.08908	0.00445328	0.155382	1	protein_coding	ZDB-GENE-090313-46			GO:0016255;GO:0042765;GO:0007369	attachment of GPI anchor to protein;GPI-anchor transamidase complex;gastrulation	biological_process;cellular_component	PTHR12959	GPI TRANSAMIDASE COMPONENT PIG T PRECURSOR PHOSPHATIDYLINOSITOL GLYCAN BIOSYNTHESIS CLASS T	GO:0009058;GO:0006464;GO:0006629;GO:0032991;GO:0005575	biosynthetic process;cellular protein modification process;lipid metabolic process;protein-containing complex;cellular_component
ENSONIG00000005424	transmembrane protein 179	zgc:153018	262.443	204.79	1.28148	0.357806	7.7838	8.08909	0.00445325	0.155382	1	protein_coding	ZDB-GENE-060929-752	100705753	I3JD73	GO:0016020;GO:0016021	membrane;integral component of membrane	cellular_component	PTHR31872	TRANSMEMBRANE 179	GO:0005575	cellular_component
ENSONIG00000021427	chemokine XC receptor 1		0.538228	1.29598	-2.39008	-1.25706	0.198775	8.07984	0.00447603	0.155868	1	protein_coding		100690617	I3L032	GO:0006935;GO:0004950;GO:0016021;GO:0007186;GO:0004930;GO:0016020;GO:0007165;GO:0070098	chemotaxis;chemokine receptor activity;integral component of membrane;G protein-coupled receptor signaling pathway;G protein-coupled receptor activity;membrane;signal transduction;chemokine-mediated signaling pathway	biological_process;molecular_function;cellular_component	PTHR24227	C C CHEMOKINE RECEPTOR TYPE C C CKR CC CKR CCR ANTIGEN	GO:0003674;GO:0007165;GO:0005575;GO:0040011	molecular_function;signal transduction;cellular_component;locomotion
ENSONIG00000006089	tyrosine-protein kinase yes	YES1	19.1629	14.493	1.32675	0.407899	4.16202	8.06429	0.00451461	0.156903	1	protein_coding		100709943	I3JFN1	GO:0004713;GO:0006468;GO:0004672;GO:0005524;GO:0005515;GO:0016740;GO:0000166;GO:0016301;GO:0016310;GO:0004715;GO:0018108	protein tyrosine kinase activity;protein phosphorylation;protein kinase activity;ATP binding;protein binding;transferase activity;nucleotide binding;kinase activity;phosphorylation;non-membrane spanning protein tyrosine kinase activity;peptidyl-tyrosine phosphorylation	molecular_function;biological_process	PTHR24418_SF90	TYROSINE KINASE YES EC_2.7.10.2 P61 YES	GO:0003674;GO:0043167;GO:0016301;GO:0006464	molecular_function;ion binding;kinase activity;cellular protein modification process	04660+2.7.10.2
ENSONIG00000006880	neurocalcin-delta A	ncalda	219.903	180.631	1.21737	0.283765	7.62783	8.03731	0.00458236	0.158634	1	protein_coding	ZDB-GENE-080220-28	100692199	I3JII8	GO:0005509	calcium ion binding	molecular_function	PTHR23055_SF87	NEUROCALCIN DELTA	GO:0003674;GO:0043167	molecular_function;ion binding
ENSONIG00000014807	leucine rich repeat containing 17	LRRC17 (1 of many)	0.591698	1.44076	-2.46835	-1.30355	0.0345753	8.03815	0.00458022	0.158634	1	protein_coding			I3KBZ7	GO:0005515	protein binding	molecular_function	PTHR24365_SF22	LEUCINE RICH REPEAT CONTAINING 17 PRECURSOR	GO:0003674	molecular_function
ENSONIG00000003065	NEDD8 activating enzyme E1 subunit 1	nae1	98.7022	80.636	1.22361	0.291144	6.53473	8.03201	0.00459579	0.158788	1	protein_coding	ZDB-GENE-040426-1552	100695127	I3J4P7	GO:0045116;GO:0019781;GO:0008641	protein neddylation;NEDD8 activating enzyme activity;ubiquitin-like modifier activating enzyme activity	biological_process;molecular_function	PTHR10953_SF29	NEDD8 ACTIVATING ENZYME E1 REGULATORY SUBUNIT APP BP1 AMYLOID BINDING 1	GO:0016874;GO:0006464	ligase activity;cellular protein modification process
ENSONIG00000004202	synaptoporin	synpr	52.9205	42.0452	1.25833	0.331508	5.63358	8.0169	0.00463427	0.159495	1	protein_coding	ZDB-GENE-030616-625			GO:0008021;GO:0016020;GO:0016021	synaptic vesicle;membrane;integral component of membrane	cellular_component	PTHR10306	SYNAPTOPHYSIN	GO:0005575;GO:0043226;GO:0031410	cellular_component;organelle;cytoplasmic vesicle
ENSONIG00000014961	semaphorin 3E	sema3e	178.767	146.658	1.21872	0.285372	7.31046	8.01802	0.00463141	0.159495	1	protein_coding	ZDB-GENE-030131-7864	100705568	I3KCJ0	GO:0005515;GO:0002040	protein binding;sprouting angiogenesis	molecular_function;biological_process	PTHR11036_SF22	SEMAPHORIN 3E PRECURSOR	GO:0003674;GO:0048646	molecular_function;anatomical structure formation involved in morphogenesis
ENSONIG00000000291	NOP10 ribonucleoprotein	nop10	8.24154	13.1475	-1.58707	-0.666365	3.61389	8.0132	0.00464376	0.159511	1	protein_coding	ZDB-GENE-041007-4	100692034	I3IUS6	GO:0042254;GO:0030515;GO:0001522;GO:0006364;GO:0060215	ribosome biogenesis;snoRNA binding;pseudouridine synthesis;rRNA processing;primitive hemopoiesis	biological_process;molecular_function	PTHR13305_SF0	UNCHARACTERIZED	GO:0034641;GO:0003674;GO:0003723;GO:0042254;GO:0048856	cellular nitrogen compound metabolic process;molecular_function;RNA binding;ribosome biogenesis;anatomical structure development
ENSONIG00000013550			9.74893	6.723	1.44988	0.535929	3.07745	8.00196	0.00467269	0.160193	1	protein_coding							PTHR10794	ABHYDROLASE DOMAIN CONTAINING
ENSONIG00000005497	SUV3-like helicase	supv3l1	16.6354	12.3722	1.3464	0.429105	4.06562	7.99299	0.00469587	0.160367	2	protein_coding	ZDB-GENE-030131-2838						PTHR12131	ATP DEPENDENT RNA HELICASE MITOCHONDRIAL PRECURSOR EC_3.6.4.13
ENSONIG00000026071			57.9184	82.829	-1.42826	-0.514258	6.03002	7.99552	0.00468933	0.160367	2	lincRNA
ENSONIG00000015183	peroxisomal biogenesis factor 19	pex19	154.192	119.059	1.29462	0.372531	7.08579	7.95813	0.0047872	0.163171	1	protein_coding	ZDB-GENE-050417-424	100695929	I3KDB5	GO:0005777	peroxisome	cellular_component	PTHR12774	PEROXISOMAL BIOGENESIS FACTOR 19 PRECURSOR PEROXIN 19 PEROXISOMAL FARNESYLATED	GO:0005575;GO:0043226;GO:0005777	cellular_component;organelle;peroxisome
ENSONIG00000010045	ribosomal protein S3A	rps3a	451.606	583.479	-1.29196	-0.369565	9.10938	7.94406	0.00482455	0.164127	1	protein_coding	ZDB-GENE-030131-9184	100690034	I3JUT9	GO:0005622;GO:0005840;GO:0006412;GO:0003735;GO:0005737;GO:0022627;GO:0043009	intracellular;ribosome;translation;structural constituent of ribosome;cytoplasm;cytosolic small ribosomal subunit;chordate embryonic development	cellular_component;biological_process;molecular_function	TF629374	40S RIBOSOMAL S3A	GO:0003674;GO:0005198;GO:0003735;GO:0009058;GO:0034641;GO:0006412;GO:0032991;GO:0005575;GO:0043226;GO:0005840;GO:0005622;GO:0005737;GO:0048856;GO:0009790	molecular_function;structural molecule activity;structural constituent of ribosome;biosynthetic process;cellular nitrogen compound metabolic process;translation;protein-containing complex;cellular_component;organelle;ribosome;intracellular;cytoplasm;anatomical structure development;embryo development
ENSONIG00000003330	anaphase promoting complex subunit 11	anapc11	17.3258	22.4413	-1.29978	-0.378269	4.37619	7.93509	0.00484853	0.164627	2	protein_coding	ZDB-GENE-061013-383	100703623	I3J5Q1;I3J5Q0	GO:0005680;GO:0004842;GO:0016567	anaphase-promoting complex;ubiquitin-protein transferase activity;protein ubiquitination	cellular_component;molecular_function;biological_process	PTHR11210_SF1	ANAPHASE PROMOTING COMPLEX SUBUNIT 11 APC11 CYCLOSOME SUBUNIT 11	GO:0032991;GO:0005575;GO:0006464	protein-containing complex;cellular_component;cellular protein modification process
ENSONIG00000003042	sarcoglycan, beta (dystrophin-associated glycoprotein)	sgcb	95.6316	77.2181	1.23753	0.307466	6.39741	7.92727	0.00486952	0.165023	1	protein_coding	ZDB-GENE-030131-6695			GO:0016012;GO:0016021;GO:0007517;GO:0016020;GO:0042383	sarcoglycan complex;integral component of membrane;muscle organ development;membrane;sarcolemma	cellular_component;biological_process	PTHR21142	BETA SARCOGLYCAN BETA SG 43 KDA DYSTROPHIN ASSOCIATED GLYCOPROTEIN 43DAG	GO:0048856;GO:0005575;GO:0032991;GO:0005886	anatomical structure development;cellular_component;protein-containing complex;plasma membrane
ENSONIG00000000700	docking protein 2	dok2	2.56114	4.33487	-1.66682	-0.737095	1.88463	7.91431	0.00490452	0.165328	2	protein_coding	ZDB-GENE-080721-4			GO:0060319	primitive erythrocyte differentiation	biological_process	PTHR21258_SF14	DOCKING 2 DOWNSTREAM OF TYROSINE KINASE 2 P56 DOK 2	GO:0002376;GO:0042592;GO:0030154	immune system process;homeostatic process;cell differentiation
ENSONIG00000015465	WD repeat domain 41	wdr41	35.9217	27.1804	1.31847	0.398863	5.008	7.91589	0.00490025	0.165328	1	protein_coding	ZDB-GENE-050706-152			GO:0010506;GO:0005515	regulation of autophagy;protein binding	biological_process;molecular_function	PTHR22805	WD REPEAT CONTAINING 41	GO:0003674	molecular_function
ENSONIG00000021082	uncharacterized LOC100702170	rpz	40.5996	57.7964	-1.42281	-0.50874	5.72008	7.91356	0.00490657	0.165328	1	protein_coding	ZDB-GENE-070117-651	100702170	I3KZ37	GO:0016020;GO:0016021;GO:0033333	membrane;integral component of membrane;fin development	cellular_component;biological_process	TF649781	RAPUNZEL	GO:0005575;GO:0048856	cellular_component;anatomical structure development
ENSONIG00000008648	secernin 3	scrn3	23.9904	17.7857	1.34892	0.43181	4.43479	7.90626	0.0049264	0.16568	1	protein_coding	ZDB-GENE-030131-4783	100700104	I3JPS9	GO:0016805;GO:0006508	dipeptidase activity;proteolysis	molecular_function;biological_process	PTHR12994	SECERNIN
ENSONIG00000001424	RNA polymerase III subunit K	polr3k	4.28831	6.98241	-1.61587	-0.692315	2.60528	7.87713	0.00500639	0.1671	1	protein_coding	ZDB-GENE-040718-291	100701443	I3IYV3	GO:0042779;GO:0008270;GO:0006351;GO:0003676;GO:0005634;GO:0003899;GO:0046872;GO:0005730;GO:0061484	tRNA 3'-trailer cleavage;zinc ion binding;transcription, DNA-templated;nucleic acid binding;nucleus;DNA-directed 5'-3' RNA polymerase activity;metal ion binding;nucleolus;hematopoietic stem cell homeostasis	biological_process;molecular_function;cellular_component	PTHR11239_SF12	DNA DIRECTED RNA POLYMERASE III SUBUNIT RPC10 RNA POLYMERASE III SUBUNIT C10 DNA DIRECTED RNA POLYMERASES III 12.5 KDA POLYPEPTIDE RNA POLYMERASE III SUBUNIT C11	GO:0003674;GO:0009058;GO:0034641;GO:0043167;GO:0005575;GO:0043226;GO:0005634;GO:0016779;GO:0005730;GO:0042592	molecular_function;biosynthetic process;cellular nitrogen compound metabolic process;ion binding;cellular_component;organelle;nucleus;nucleotidyltransferase activity;nucleolus;homeostatic process
ENSONIG00000011112	cell adhesion molecule 1	cadm1b	274.037	227.779	1.20316	0.266831	8.00293	7.88566	0.00498282	0.1671	2	protein_coding	ZDB-GENE-080327-34	100699154	I3JYP2;I3JYP1	GO:0016020;GO:0016021	membrane;integral component of membrane	cellular_component	PTHR23277_SF53	CELL ADHESION MOLECULE 1 PRECURSOR IMMUNOGLOBULIN SUPERFAMILY MEMBER 4 IGSF4 NECTIN 2 NECL 2 SPERMATOGENIC IMMUNOGLOBULIN SUPERFAMILY SGIGSF SYNAPTIC CELL ADHESION MOLECULE SYNCAM TUMOR SUPPRESSOR IN LUNG CANCER 1 TSLC 1	GO:0005575	cellular_component
ENSONIG00000014105	fibrinogen beta chain	fgb	0.162983	1.21526	-7.49703	-2.90632	-0.884754	7.88011	0.00499814	0.1671	1	protein_coding	ZDB-GENE-030131-9261	100689963	I3K9D6	GO:0005102;GO:0007596;GO:0030168;GO:0051258;GO:0005577;GO:0072378	signaling receptor binding;blood coagulation;platelet activation;protein polymerization;fibrinogen complex;blood coagulation, fibrin clot formation	molecular_function;biological_process;cellular_component	PTHR19143_SF23	FIBRINOGEN BETA CHAIN FIBRINOPEPTIDE B; FIBRINOGEN BETA CHAIN]	GO:0003674;GO:0022607;GO:0065003;GO:0032991;GO:0005575;GO:0005615	molecular_function;cellular component assembly;protein-containing complex assembly;protein-containing complex;cellular_component;extracellular space
ENSONIG00000024562			1.56572	3.12924	-1.98181	-0.986819	1.23705	7.88213	0.00499257	0.1671	3	lincRNA
ENSONIG00000015282			0.410943	1.11164	-2.65038	-1.4062	-0.125169	7.85571	0.00506604	0.168715	1	protein_coding			I3KDN4	GO:0005496;GO:0003707;GO:0008270;GO:0043565;GO:0003700;GO:0005634;GO:0006355;GO:0003677;GO:0046872;GO:0043401	steroid binding;steroid hormone receptor activity;zinc ion binding;sequence-specific DNA binding;DNA-binding transcription factor activity;nucleus;regulation of transcription, DNA-templated;DNA binding;metal ion binding;steroid hormone mediated signaling pathway	molecular_function;cellular_component;biological_process	PTHR24084_SF23	STEROID HORMONE RECEPTOR ERR2 ESTROGEN RECEPTOR 2 ESTROGEN RELATED RECEPTOR BETA ERR BETA NUCLEAR RECEPTOR SUBFAMILY 3 GROUP B MEMBER 2	GO:0003674;GO:0003677;GO:0005575;GO:0043226;GO:0005634;GO:0003700;GO:0043167;GO:0008289;GO:0007165	molecular_function;DNA binding;cellular_component;organelle;nucleus;DNA-binding transcription factor activity;ion binding;lipid binding;signal transduction
ENSONIG00000020750	E3 ubiquitin-protein ligase rnf146	RNF146 (1 of many)	34.4111	27.3968	1.25144	0.323587	4.95775	7.85293	0.00507385	0.168715	1	protein_coding		100707174	I3KY59	GO:0061630;GO:0016055;GO:0008270;GO:0072572;GO:0016567	ubiquitin protein ligase activity;Wnt signaling pathway;zinc ion binding;poly-ADP-D-ribose binding;protein ubiquitination	molecular_function;biological_process	PTHR13417_SF2	E3 UBIQUITIN LIGASE RNF146 EC_2.3.2.27 RING FINGER 146 RING TYPE E3 UBIQUITIN TRANSFERASE RNF146	GO:0003674;GO:0043167;GO:0007165;GO:0006464	molecular_function;ion binding;signal transduction;cellular protein modification process
ENSONIG00000018149	coiled-coil-helix-coiled-coil-helix domain containing 10	chchd10	14.4303	18.8638	-1.30379	-0.382708	4.1102	7.83218	0.00513243	0.170343	1	protein_coding	ZDB-GENE-040426-1753			GO:0007409;GO:0014866	axonogenesis;skeletal myofibril assembly	biological_process	PTHR13523_SF4	COILED COIL HELIX COILED COIL HELIX DOMAIN CONTAINING 10 MITOCHONDRIAL PRECURSOR 4	GO:0007010;GO:0022607;GO:0048856;GO:0048646	cytoskeleton organization;cellular component assembly;anatomical structure development;anatomical structure formation involved in morphogenesis
ENSONIG00000007363	alpha-N-acetylgalactosaminide alpha-2,6-sialyltransferase 3	st6galnac4	100.358	75.9555	1.31992	0.400451	6.45225	7.79833	0.00522945	0.171134	1	protein_coding	ZDB-GENE-060322-6	100701389	I3JK96	GO:0006486;GO:0008373;GO:0016020;GO:0016021;GO:0016740;GO:0016757;GO:0005794;GO:0097503	protein glycosylation;sialyltransferase activity;membrane;integral component of membrane;transferase activity;transferase activity, transferring glycosyl groups;Golgi apparatus;sialylation	biological_process;molecular_function;cellular_component	PTHR13713_SF35	ALPHA N ACETYL NEURAMINYL 2 3 BETA GALACTOSYL 1 3 N ACETYL GALACTOSAMINIDE ALPHA 2 6 SIALYLTRANSFERASE EC_2.4.99.7 NEUAC ALPHA 2 3 GAL BETA 1 3 GALNAC ALPHA 2 6 SIALYLTRANSFERASE ST6GALNAC IV ST6GALNACIV SIALYLTRANSFERASE 7D SIAT7 D	GO:0016757;GO:0006464;GO:0005575;GO:0043226;GO:0005794	transferase activity, transferring glycosyl groups;cellular protein modification process;cellular_component;organelle;Golgi apparatus
ENSONIG00000007750	CBP80/20-dependent translation initiation factor	ctif	22.8717	30.5548	-1.33175	-0.413328	4.71799	7.80775	0.00520227	0.171134	1	protein_coding	ZDB-GENE-130530-1003			GO:0003723;GO:0005515	RNA binding;protein binding	molecular_function	PTHR23254	MIF4G DOMAIN CONTAINING	GO:0003674;GO:0003723	molecular_function;RNA binding
ENSONIG00000011292	BRCA1 associated protein	brap	36.1946	28.6368	1.26246	0.336232	4.99311	7.79353	0.00524335	0.171134	1	protein_coding	ZDB-GENE-040718-168	100695683	I3JZB8	GO:0008270;GO:0003676	zinc ion binding;nucleic acid binding	molecular_function	PTHR24007	BRCA1 ASSOCIATED EC_2.3.2.27 BRAP2 IMPEDES MITOGENIC SIGNAL PROPAGATION IMP RING TYPE E3 UBIQUITIN TRANSFERASE BRAP2	GO:0003674;GO:0043167	molecular_function;ion binding
ENSONIG00000011297	zinc finger DHHC-type containing 12	zdhhc12b	78.2565	61.5867	1.27181	0.346883	6.11129	7.81083	0.00519339	0.171134	1	protein_coding	ZDB-GENE-070705-356	100696593	I3JZC4	GO:0016020;GO:0016021;GO:0016740;GO:0016746;GO:0019706	membrane;integral component of membrane;transferase activity;transferase activity, transferring acyl groups;protein-cysteine S-palmitoyltransferase activity	cellular_component;molecular_function	PTHR22883_SF33	PROBABLE PALMITOYLTRANSFERASE ZDHHC12 EC_2.3.1.225 ZINC FINGER DHHC DOMAIN CONTAINING 12 DHHC 12	GO:0005575;GO:0016746	cellular_component;transferase activity, transferring acyl groups
ENSONIG00000012205	Fas apoptotic inhibitory molecule 2	FAIM2	504.541	412.388	1.22321	0.290675	8.83429	7.79896	0.00522764	0.171134	1	protein_coding				GO:0016020;GO:0016021	membrane;integral component of membrane	cellular_component	PTHR23291	TRANSMEMBRANE BAX INHIBITOR MOTIF CONTAINING	GO:0005575	cellular_component
ENSONIG00000013177	protein interacting with cyclin A1	proca1	23.2435	33.2679	-1.42651	-0.512494	4.90417	7.79494	0.00523927	0.171134	1	protein_coding	ZDB-GENE-110418-1			GO:0050482;GO:0006644;GO:0004623;GO:0005576	arachidonic acid secretion;phospholipid metabolic process;phospholipase A2 activity;extracellular region	biological_process;molecular_function;cellular_component	PTHR12253_SF9	INTERACTING WITH CYCLIN A1	GO:0006629;GO:0006810;GO:0005575;GO:0005576	lipid metabolic process;transport;cellular_component;extracellular region	00590+3.1.1.4;00564+3.1.1.4;00592+3.1.1.4;00565+3.1.1.4;00591+3.1.1.4
ENSONIG00000015192	cAMP responsive element binding protein 3-like 3 like	creb3l3l	143.335	117.096	1.22344	0.290947	7.00603	7.79693	0.0052335	0.171134	2	protein_coding	ZDB-GENE-040426-2942			GO:0030968;GO:0035497;GO:0045944;GO:0003700;GO:0006355	endoplasmic reticulum unfolded protein response;cAMP response element binding;positive regulation of transcription by RNA polymerase II;DNA-binding transcription factor activity;regulation of transcription, DNA-templated	biological_process;molecular_function	PTHR22952_SF100;PTHR22952_SF98	CYCLIC AMP RESPONSIVE ELEMENT BINDING 3 CREB 3 CAMP RESPONSIVE ELEMENT BINDING 3 TRANSCRIPTION FACTOR LZIP [CONTAINS PROCESSED CYCLIC AMP RESPONSIVE ELEMENT BINDING;CYCLIC AMP RESPONSIVE ELEMENT BINDING 3 3 CAMP RESPONSIVE ELEMENT BINDING 3 3 TRANSCRIPTION FACTOR CREB H [CONTAINS PROCESSED CYCLIC AMP RESPONSIVE ELEMENT BINDING 3 3]	GO:0003674;GO:0003700;GO:0003677;GO:0006950;GO:0007165	molecular_function;DNA-binding transcription factor activity;DNA binding;response to stress;signal transduction
ENSONIG00000015925	cytochrome c oxidase subunit 7C, mitochondrial	cox7c	131.891	226.619	-1.71785	-0.7806	7.70282	7.81913	0.0051696	0.171134	1	protein_coding	ZDB-GENE-030131-8062	100701956	I3KG16	GO:0004129;GO:0016020;GO:0016021;GO:0022900;GO:1902600	cytochrome-c oxidase activity;membrane;integral component of membrane;electron transport chain;proton transmembrane transport	molecular_function;cellular_component;biological_process	PTHR13313_SF0	UNCHARACTERIZED	GO:0016491;GO:0022857;GO:0003674;GO:0005575;GO:0006091;GO:0006810;GO:0055085	oxidoreductase activity;transmembrane transporter activity;molecular_function;cellular_component;generation of precursor metabolites and energy;transport;transmembrane transport
ENSONIG00000020860	C1GALT1 specific chaperone 1	c1galt1c1	3.68303	1.69245	2.15344	1.10665	1.44555	7.79665	0.00523433	0.171134	1	protein_coding	ZDB-GENE-030131-2772	100694593	I3KYG7				PTHR23033_SF2	C1GALT1 SPECIFIC CHAPERONE 1 CORE 1 BETA1 3 GALACTOSYLTRANSFERASE 2 C1GAL T2 C1GALT2 CORE 1 BETA3 GAL T2 CORE 1 BETA3 GALACTOSYLTRANSFERASE SPECIFIC MOLECULAR CHAPERONE
ENSONIG00000001599	ATP-binding cassette sub-family A member 1	ABCA1 (1 of many)	16.6741	23.6412	-1.41832	-0.504181	4.43388	7.7831	0.00527372	0.171493	1	protein_coding		100699821	I3IZG5	GO:0042626;GO:0016887;GO:0055085;GO:0016021;GO:0005524;GO:0016020;GO:0000166	ATPase activity, coupled to transmembrane movement of substances;ATPase activity;transmembrane transport;integral component of membrane;ATP binding;membrane;nucleotide binding	molecular_function;biological_process;cellular_component	PTHR19229_SF34	ATP BINDING CASSETTE SUB FAMILY A MEMBER 1 ATP BINDING CASSETTE TRANSPORTER 1 ABC 1 ATP BINDING CASSETTE 1	GO:0003674;GO:0043167;GO:0005575;GO:0006810;GO:0055085;GO:0016887;GO:0022857	molecular_function;ion binding;cellular_component;transport;transmembrane transport;ATPase activity;transmembrane transporter activity
ENSONIG00000006047	FXYD domain containing ion transport regulator 6	fxyd6	147.017	115.346	1.27331	0.34858	7.03846	7.78449	0.00526965	0.171493	1	protein_coding	ZDB-GENE-030131-5919			GO:0016020;GO:0099106;GO:0043269;GO:0016021;GO:0006811	membrane;ion channel regulator activity;regulation of ion transport;integral component of membrane;ion transport	cellular_component;molecular_function;biological_process	PTHR14132	FXYD DOMAIN CONTAINING ION TRANSPORT REGULATOR SODIUM/POTASSIUM TRANSPORTING ATPASE SUBUNIT	GO:0005575;GO:0003674;GO:0006810	cellular_component;molecular_function;transport
ENSONIG00000006366			14.0782	20.1842	-1.43001	-0.516029	4.19551	7.77184	0.0053067	0.17151	2	protein_coding				GO:0005201;GO:0005515	extracellular matrix structural constituent;protein binding	molecular_function	PTHR24023_SF54	COLLAGEN ALPHA 1 I CHAIN ALPHA 1 TYPE I COLLAGEN	GO:0003674;GO:0005198	molecular_function;structural molecule activity
ENSONIG00000011183	G elongation factor mitochondrial 2	gfm2	17.4831	12.5575	1.39877	0.48416	4.03252	7.77373	0.00530115	0.17151	1	protein_coding	ZDB-GENE-060201-3	100700485	I3JYY3	GO:0005739;GO:0003924;GO:0005525;GO:0032790;GO:0000166;GO:0006412;GO:0032543	mitochondrion;GTPase activity;GTP binding;ribosome disassembly;nucleotide binding;translation;mitochondrial translation	cellular_component;molecular_function;biological_process	PTHR23115_SF13	RIBOSOME RELEASING FACTOR 2 MITOCHONDRIAL RRF2MT ELONGATION FACTOR G 2 MITOCHONDRIAL EF G2MT MEF G 2	GO:0003674;GO:0043167;GO:0003924;GO:0005575;GO:0043226;GO:0005739;GO:0009058;GO:0034641;GO:0006412	molecular_function;ion binding;GTPase activity;cellular_component;organelle;mitochondrion;biosynthetic process;cellular nitrogen compound metabolic process;translation
ENSONIG00000014524			4.92139	7.48013	-1.51782	-0.601999	2.62123	7.76795	0.00531813	0.17151	1	protein_coding				GO:0005515	protein binding	molecular_function	PTHR12156_SF17	PLECKSTRIN HOMOLOGY DOMAIN FAMILY B MEMBER 2 LL5 BETA	GO:0003674	molecular_function
ENSONIG00000019708	mitochondrial ribosomal protein S21	mrps21	9.17878	13.7376	-1.49155	-0.576814	3.6832	7.76639	0.00532273	0.17151	1	protein_coding	ZDB-GENE-070615-13	100695239	I3KUL1	GO:0005840;GO:0006412;GO:0003735	ribosome;translation;structural constituent of ribosome	cellular_component;biological_process;molecular_function	TF637327	28S RIBOSOMAL S21	GO:0003674;GO:0005198;GO:0003735;GO:0009058;GO:0034641;GO:0006412;GO:0032991;GO:0005575;GO:0043226;GO:0005840	molecular_function;structural molecule activity;structural constituent of ribosome;biosynthetic process;cellular nitrogen compound metabolic process;translation;protein-containing complex;cellular_component;organelle;ribosome
ENSONIG00000026788			3.10404	1.61457	1.91396	0.936564	1.35429	7.77568	0.00529543	0.17151	1	lincRNA
ENSONIG00000007595	late endosomal/lysosomal adaptor, MAPK and MTOR activator 4	lamtor4	22.0594	33.8677	-1.53145	-0.614896	4.93874	7.75345	0.00536101	0.172117	1	protein_coding	ZDB-GENE-030131-7438	100709523	I3JL30	GO:0071986;GO:0032008;GO:0071230	Ragulator complex;positive regulation of TOR signaling;cellular response to amino acid stimulus	cellular_component;biological_process	TF324352	RAGULATOR COMPLEX LAMTOR4 LATE ENDOSOMAL/LYSOSOMAL ADAPTOR AND MAPK AND MTOR ACTIVATOR 4 [CONTAINS RAGULATOR COMPLEX LAMTOR4 N TERMINALLY PROCESSED]	GO:0032991;GO:0005575	protein-containing complex;cellular_component
ENSONIG00000020453	solute carrier family 35 member G2	slc35g2b	106.127	87.0265	1.21894	0.285624	6.60778	7.75447	0.00535797	0.172117	1	protein_coding	ZDB-GENE-050320-142	100701887	I3KXB2	GO:0016021;GO:0016020	integral component of membrane;membrane	cellular_component	PTHR22911	SOLUTE CARRIER FAMILY 35 MEMBER ACYL MALONYL CONDENSING ENZYME 1	GO:0005575	cellular_component
ENSONIG00000005099	mediator complex subunit 19	med19a	27.6971	34.5521	-1.24394	-0.314914	5.04597	7.74655	0.00538152	0.172462	1	protein_coding	ZDB-GENE-060929-232	100706646	I3JC19	GO:0016592;GO:0003712;GO:0006357;GO:0005634	mediator complex;transcription coregulator activity;regulation of transcription by RNA polymerase II;nucleus	cellular_component;molecular_function;biological_process	PTHR22536	MEDIATOR OF RNA POLYMERASE II TRANSCRIPTION SUBUNIT 19 MEDIATOR COMPLEX SUBUNIT 19	GO:0003674;GO:0032991;GO:0005575;GO:0043226;GO:0005634	molecular_function;protein-containing complex;cellular_component;organelle;nucleus
ENSONIG00000011151	transportin 1	tnpo1	23.7069	31.1426	-1.3164	-0.396594	4.65605	7.7337	0.00541996	0.173197	1	protein_coding	ZDB-GENE-080819-1			GO:0006606;GO:0006886;GO:0008536;GO:0005634;GO:0007224;GO:0061053	protein import into nucleus;intracellular protein transport;Ran GTPase binding;nucleus;smoothened signaling pathway;somite development	biological_process;molecular_function;cellular_component	PTHR10527_SF21	TRANSPORTIN 1 IMPORTIN BETA 2 KARYOPHERIN BETA 2	GO:0006810;GO:0006913;GO:0005575;GO:0043226;GO:0005634;GO:0007165;GO:0048856;GO:0009790	transport;nucleocytoplasmic transport;cellular_component;organelle;nucleus;signal transduction;anatomical structure development;embryo development
ENSONIG00000013659			39.5974	53.5927	-1.35129	-0.434338	5.5103	7.73234	0.00542405	0.173197	1	protein_coding			I3K7T8	GO:0005882;GO:0005198;GO:0061564;GO:0005883	intermediate filament;structural molecule activity;axon development;neurofilament	cellular_component;molecular_function;biological_process	PTHR23214	NEUROFILAMENT HEAVY POLYPEPTIDE NF H 200 KDA NEUROFILAMENT NEUROFILAMENT TRIPLET H	GO:0003674;GO:0005198;GO:0005575;GO:0048856	molecular_function;structural molecule activity;cellular_component;anatomical structure development
ENSONIG00000022592			1.99673	3.50007	-1.73638	-0.796082	1.47713	7.72673	0.00544093	0.173424	2	lincRNA
ENSONIG00000014546	L-lactate dehydrogenase A chain	ldha	762.382	607.55	1.25459	0.327212	9.44408	7.71852	0.00546573	0.173901	1	protein_coding	ZDB-GENE-991026-5	100534427	I3KB11	GO:0004459;GO:0016616;GO:0019752;GO:0005975;GO:0003824;GO:0005737;GO:0055114;GO:0016491;GO:0001666	L-lactate dehydrogenase activity;oxidoreductase activity, acting on the CH-OH group of donors, NAD or NADP as acceptor;carboxylic acid metabolic process;carbohydrate metabolic process;catalytic activity;cytoplasm;oxidation-reduction process;oxidoreductase activity;response to hypoxia	molecular_function;biological_process;cellular_component	PTHR11540_SF17	L LACTATE DEHYDROGENASE A CHAIN LDH A EC_1.1.1.27	GO:0016491;GO:0005575;GO:0005737;GO:0003674;GO:0005975;GO:0044281;GO:0006950	oxidoreductase activity;cellular_component;cytoplasm;molecular_function;carbohydrate metabolic process;small molecule metabolic process;response to stress	00270+1.1.1.27;00010+1.1.1.27;00620+1.1.1.27;00640+1.1.1.27
ENSONIG00000005857	leucine-rich repeat and immunoglobulin-like domain-containing nogo receptor-interacting protein 1-B	lingo1b	163.481	138.778	1.17786	0.236167	7.22799	7.71343	0.00548114	0.174078	1	protein_coding	ZDB-GENE-040912-136	100703008	I3JET5	GO:0005515;GO:0016020;GO:0016021;GO:0042552;GO:0048666	protein binding;membrane;integral component of membrane;myelination;neuron development	molecular_function;cellular_component;biological_process	PTHR24373_SF31	LEUCINE RICH REPEAT AND IMMUNOGLOBULIN DOMAIN CONTAINING NOGO RECEPTOR INTERACTING 1 PRECURSOR	GO:0003674;GO:0005575;GO:0048856	molecular_function;cellular_component;anatomical structure development
ENSONIG00000010831	ORAI calcium release-activated calcium modulator 1a	orai1a	7.72456	5.02417	1.5324	0.615789	2.75188	7.70181	0.00551654	0.174888	1	protein_coding	ZDB-GENE-110721-1			GO:0016020;GO:0016021	membrane;integral component of membrane	cellular_component	PTHR31501	CALCIUM RELEASE ACTIVATED CALCIUM CHANNEL 1 ORAI	GO:0005575	cellular_component
ENSONIG00000014398	NADH:ubiquinone oxidoreductase subunit B4	ndufb4	25.0412	36.83	-1.46841	-0.554251	5.13826	7.69038	0.0055516	0.175685	1	protein_coding	ZDB-GENE-040426-1973	100707800	I3KAF7	GO:0005739;GO:0008137;GO:0016020;GO:0016021;GO:0055114	mitochondrion;NADH dehydrogenase (ubiquinone) activity;membrane;integral component of membrane;oxidation-reduction process	cellular_component;molecular_function;biological_process	PTHR15469	NADH DEHYDROGENASE [UBIQUINONE] 1 BETA SUBCOMPLEX SUBUNIT 4 COMPLEX I B15 CI B15 NADH UBIQUINONE OXIDOREDUCTASE B15 SUBUNIT	GO:0005575;GO:0043226;GO:0005739	cellular_component;organelle;mitochondrion
ENSONIG00000005737	contactin 5	cntn5	67.4802	53.0005	1.27203	0.347134	5.9187	7.67856	0.00558806	0.176074	2	protein_coding	ZDB-GENE-030131-5640	100699136	I3JEE0;I3JEE1	GO:0005515	protein binding	molecular_function	PTHR10489_SF51	CONTACTIN 5 PRECURSOR NEURAL RECOGNITION MOLECULE NB 2	GO:0003674	molecular_function
ENSONIG00000006026	nuclear receptor subfamily 4, group A, member 3	nr4a3	13.692	19.1871	-1.40069	-0.486143	3.9777	7.68266	0.0055754	0.176074	1	protein_coding	ZDB-GENE-070824-4			GO:0003707;GO:0008270;GO:0043565;GO:0003700;GO:0005634;GO:0006355;GO:0003677;GO:0004879;GO:0046872;GO:0043401;GO:0030522;GO:0001780	steroid hormone receptor activity;zinc ion binding;sequence-specific DNA binding;DNA-binding transcription factor activity;nucleus;regulation of transcription, DNA-templated;DNA binding;nuclear receptor activity;metal ion binding;steroid hormone mediated signaling pathway;intracellular receptor signaling pathway;neutrophil homeostasis	molecular_function;cellular_component;biological_process	PTHR24085	NUCLEAR RECEPTOR SUBFAMILY 4 GROUP A MEMBER	GO:0003674;GO:0003677;GO:0005575;GO:0043226;GO:0005634;GO:0003700;GO:0043167;GO:0007165;GO:0002376;GO:0042592	molecular_function;DNA binding;cellular_component;organelle;nucleus;DNA-binding transcription factor activity;ion binding;signal transduction;immune system process;homeostatic process
ENSONIG00000010009	cofilin-2	cfl1l	21.4261	32.0122	-1.49433	-0.5795	4.85246	7.67672	0.00559377	0.176074	1	protein_coding	ZDB-GENE-040426-2770	100691336	I3JUP2	GO:0015629;GO:0005622;GO:0003779;GO:0030042	actin cytoskeleton;intracellular;actin binding;actin filament depolymerization	cellular_component;molecular_function;biological_process	PTHR11913	COFILIN	GO:0003674;GO:0008092;GO:0005575;GO:0005622;GO:0043226;GO:0005856	molecular_function;cytoskeletal protein binding;cellular_component;intracellular;organelle;cytoskeleton
ENSONIG00000009895			4.97831	8.19813	-1.63251	-0.707092	2.73278	7.6734	0.00560407	0.176085	1	protein_coding				GO:0016020;GO:0005515	membrane;protein binding	cellular_component;molecular_function	PTHR19134_SF206	RECEPTOR TYPE TYROSINE PHOSPHATASE MU PRECURSOR TYROSINE PHOSPHATASE MU R PTP MU EC_3.1.3.48	GO:0003674;GO:0005575	molecular_function;cellular_component
ENSONIG00000000534	phosphorylase, glycogen, liver	pygl	15.3476	19.8872	-1.29597	-0.374031	4.19176	7.65764	0.00565324	0.177001	1	protein_coding	ZDB-GENE-041205-1			GO:0004645;GO:0008184;GO:0030170;GO:0005975;GO:0016740;GO:0016757;GO:0102250;GO:0102499	phosphorylase activity;glycogen phosphorylase activity;pyridoxal phosphate binding;carbohydrate metabolic process;transferase activity;transferase activity, transferring glycosyl groups;linear malto-oligosaccharide phosphorylase activity;SHG alpha-glucan phosphorylase activity	molecular_function;biological_process	PTHR11468	GLYCOGEN PHOSPHORYLASE EC_2.4.1.1	GO:0005975;GO:0003674;GO:0043167;GO:0016757	carbohydrate metabolic process;molecular_function;ion binding;transferase activity, transferring glycosyl groups	00500+2.4.1.1
ENSONIG00000010270	DnaJ heat shock protein family (Hsp40) member C12	dnajc12	44.9386	33.9999	1.32051	0.401095	5.36487	7.65779	0.00565276	0.177001	2	protein_coding	ZDB-GENE-070801-3	100701075	I3JVM0;I3JVL9				PTHR24078_SF137	DNAJ HOMOLOG SUBFAMILY C MEMBER 12 J DOMAIN CONTAINING 1
ENSONIG00000004183	zinc finger CCCH-type containing 18	zc3h18	51.1577	63.2343	-1.23506	-0.304583	5.79356	7.64698	0.00568674	0.177136	2	protein_coding	ZDB-GENE-050419-13	100708274	I3J8S3;I3J8S4	GO:0046872	metal ion binding	molecular_function	PTHR12506_SF10	ZINC FINGER CCCH DOMAIN CONTAINING 18 NUCLEAR NHN1	GO:0003674;GO:0043167	molecular_function;ion binding
ENSONIG00000009388	ataxin 2-like	atxn2l	25.8576	33.0895	-1.2765	-0.352197	4.81321	7.64643	0.00568849	0.177136	2	protein_coding	ZDB-GENE-030131-3246						PTHR12854_SF8	ATAXIN 2
ENSONIG00000015767	neurotrimin	ntm	34.4444	25.3477	1.3544	0.437659	4.88245	7.64015	0.00570831	0.177136	2	protein_coding	ZDB-GENE-060421-6020		I3KFF3;I3KFF2	GO:0042802	identical protein binding	molecular_function	PTHR19831_SF19	OPIOID BINDING PROTEIN/CELL ADHESION MOLECULE	GO:0003674	molecular_function
ENSONIG00000016695	immunoglobulin superfamily member 11	igsf11	87.582	68.3631	1.28021	0.356378	6.26784	7.64882	0.00568095	0.177136	2	protein_coding	ZDB-GENE-080303-21	100701470	I3KIT7;I3KIT8	GO:0016020;GO:0016021;GO:0050934;GO:0097324	membrane;integral component of membrane;late stripe melanocyte differentiation;melanocyte migration	cellular_component;biological_process	PTHR12231_SF74	IMMUNOGLOBULIN SUPERFAMILY MEMBER 11 PRECURSOR IGSF11 BRAIN AND TESTIS SPECIFIC IMMUNOGLOBULIN SUPERFAMILY BT IGSF	GO:0005575;GO:0030154;GO:0048870;GO:0040011	cellular_component;cell differentiation;cell motility;locomotion
ENSONIG00000019261	leucine rich repeat containing 8 VRAC subunit Db	lrrc8db	27.62	20.831	1.32278	0.403569	4.54063	7.63721	0.00571762	0.177136	1	protein_coding	ZDB-GENE-061013-487			GO:0006884;GO:0005515;GO:0005225;GO:0098656;GO:0034702;GO:0016020;GO:0016021;GO:0005623;GO:0015698	cell volume homeostasis;protein binding;volume-sensitive anion channel activity;anion transmembrane transport;ion channel complex;membrane;integral component of membrane;cell;inorganic anion transport	biological_process;molecular_function;cellular_component	PTHR23155_SF39	VOLUME REGULATED ANION CHANNEL SUBUNIT LRRC8D LEUCINE RICH REPEAT CONTAINING 5 LEUCINE RICH REPEAT CONTAINING 8D	GO:0003674;GO:0042592;GO:0022857;GO:0006810;GO:0055085;GO:0032991;GO:0005575;GO:0005623	molecular_function;homeostatic process;transmembrane transporter activity;transport;transmembrane transport;protein-containing complex;cellular_component;cell
ENSONIG00000019428	neuronal vesicle trafficking associated 1	NSG1	508.019	426.702	1.19046	0.251519	8.87852	7.6395	0.00571037	0.177136	1	protein_coding		100699369	I3KTK9	GO:0048268;GO:0016021;GO:0032051;GO:0007212;GO:0016020	clathrin coat assembly;integral component of membrane;clathrin light chain binding;dopamine receptor signaling pathway;membrane	biological_process;cellular_component;molecular_function	TF332232	NEURONAL VESICLE TRAFFICKING ASSOCIATED NEURON SPECIFIC FAMILY MEMBER	GO:0005575;GO:0022607;GO:0065003;GO:0003674;GO:0007165	cellular_component;cellular component assembly;protein-containing complex assembly;molecular_function;signal transduction
ENSONIG00000014843	sodium/potassium-transporting ATPase subunit beta-3		746.585	599.276	1.24576	0.31703	9.44653	7.6163	0.00578429	0.178888	1	protein_coding		100695267	I3KC45	GO:0005890;GO:0006814;GO:0006813;GO:0016020;GO:0016021;GO:0006811	sodium:potassium-exchanging ATPase complex;sodium ion transport;potassium ion transport;membrane;integral component of membrane;ion transport	cellular_component;biological_process	PTHR11523	SODIUM/POTASSIUM TRANSPORTING ATPASE SUBUNIT BETA SODIUM/POTASSIUM DEPENDENT ATPASE SUBUNIT BETA	GO:0006810;GO:0032991;GO:0005575	transport;protein-containing complex;cellular_component
ENSONIG00000003686	ATP synthase membrane subunit ea	atp5mea	25.0287	55.3048	-2.20736	-1.14233	5.59839	7.61076	0.00580209	0.178964	1	protein_coding	ZDB-GENE-070928-12			GO:0000276;GO:0015986;GO:0015078	mitochondrial proton-transporting ATP synthase complex, coupling factor F(o);ATP synthesis coupled proton transport;proton transmembrane transporter activity	cellular_component;biological_process;molecular_function	PTHR12427_SF0	AMBIGUOUS	GO:0022857;GO:0003674;GO:0009058;GO:0044281;GO:0006810;GO:0034641;GO:0055085;GO:0032991;GO:0005575	transmembrane transporter activity;molecular_function;biosynthetic process;small molecule metabolic process;transport;cellular nitrogen compound metabolic process;transmembrane transport;protein-containing complex;cellular_component
ENSONIG00000010384	methionyl aminopeptidase type 1D, mitochondrial	metap1d	25.7253	20.0061	1.28391	0.360545	4.56179	7.60368	0.00582491	0.178964	1	protein_coding	ZDB-GENE-050522-71	100690700	I3JW05	GO:0004177;GO:0008235;GO:0006508;GO:0008233;GO:0016787;GO:0046872;GO:0070006;GO:0070084	aminopeptidase activity;metalloexopeptidase activity;proteolysis;peptidase activity;hydrolase activity;metal ion binding;metalloaminopeptidase activity;protein initiator methionine removal	molecular_function;biological_process	PTHR10804_SF82	METHIONINE AMINOPEPTIDASE 1D MITOCHONDRIAL PRECURSOR MAP 1D METAP 1D EC_3.4.11.18 METHIONYL AMINOPEPTIDASE TYPE 1D MITOCHONDRIAL PEPTIDASE M 1D	GO:0008233;GO:0003674;GO:0043167;GO:0006464	peptidase activity;molecular_function;ion binding;cellular protein modification process
ENSONIG00000013378	EWS RNA-binding protein 1b	ewsr1b	112.613	136.003	-1.20774	-0.272309	7.00282	7.60206	0.00583017	0.178964	1	protein_coding	ZDB-GENE-030131-1600			GO:0003723;GO:0003676;GO:0006355;GO:0046872	RNA binding;nucleic acid binding;regulation of transcription, DNA-templated;metal ion binding	molecular_function;biological_process	PTHR23238_SF3	RNA BINDING EWS	GO:0003674;GO:0003723;GO:0043167	molecular_function;RNA binding;ion binding
ENSONIG00000017214	NADH:ubiquinone oxidoreductase subunit B10	ndufb10	62.7089	81.8073	-1.30339	-0.382265	6.29211	7.59985	0.00583731	0.178964	1	protein_coding	ZDB-GENE-040426-1691	100701139	I3KKS0				PTHR13094	NADH DEHYDROGENASE [UBIQUINONE] 1 BETA SUBCOMPLEX SUBUNIT 10 COMPLEX I PDSW CI PDSW NADH UBIQUINONE OXIDOREDUCTASE PDSW SUBUNIT
ENSONIG00000017695	Fas associated factor family member 2	faf2	71.2787	59.0283	1.20552	0.269654	6.0248	7.60866	0.00580887	0.178964	2	protein_coding	ZDB-GENE-050208-312	100710930	I3KMG8;I3KMG7	GO:0005515;GO:0016020;GO:0016021	protein binding;membrane;integral component of membrane	molecular_function;cellular_component	PTHR23322_SF23	FAS ASSOCIATED FACTOR 2 UBX DOMAIN CONTAINING 8	GO:0003674;GO:0005575	molecular_function;cellular_component
ENSONIG00000001865	Kv channel-interacting protein 1	kcnip1b	151.506	127.636	1.18651	0.24672	7.10059	7.59327	0.00585865	0.179209	1	protein_coding	ZDB-GENE-041212-57	100710683	I3J0D6	GO:0005509	calcium ion binding	molecular_function	PTHR23055_SF27	KV CHANNEL INTERACTING 1 KCHIP1 A TYPE POTASSIUM CHANNEL MODULATORY 1 POTASSIUM CHANNEL INTERACTING 1	GO:0003674;GO:0043167	molecular_function;ion binding
ENSONIG00000005476	neuronal PAS domain protein 4	npas4a	111.353	136.342	-1.22321	-0.290673	6.87714	7.59114	0.00586557	0.179209	2	protein_coding	ZDB-GENE-060616-396	100694411	I3JDE2;I3JDE1	GO:0046983;GO:0005515;GO:0005634;GO:0001568;GO:0030900	protein dimerization activity;protein binding;nucleus;blood vessel development;forebrain development	molecular_function;cellular_component;biological_process	PTHR23043_SF13	NEURONAL PAS DOMAIN CONTAINING 4 NEURONAL PAS4 HLH PAS TRANSCRIPTION FACTOR NXF	GO:0003674;GO:0005575;GO:0043226;GO:0005634;GO:0048856	molecular_function;cellular_component;organelle;nucleus;anatomical structure development
ENSONIG00000009271	adenylate cyclase activating polypeptide 1a (pituitary) receptor type I	adcyap1r1a	331.4	277.101	1.19605	0.258283	8.23804	7.58195	0.00589555	0.179324	1	protein_coding	ZDB-GENE-050315-1			GO:0004999;GO:0004888;GO:0007166;GO:0016021;GO:0007186;GO:0004930;GO:0016020;GO:0007165	vasoactive intestinal polypeptide receptor activity;transmembrane signaling receptor activity;cell surface receptor signaling pathway;integral component of membrane;G protein-coupled receptor signaling pathway;G protein-coupled receptor activity;membrane;signal transduction	molecular_function;biological_process;cellular_component	PTHR12011_SF228	PITUITARY ADENYLATE CYCLASE ACTIVATING POLYPEPTIDE TYPE I RECEPTOR PRECURSOR PACAP TYPE I RECEPTOR PACAP R 1 PACAP R1	GO:0005575;GO:0003674;GO:0007165	cellular_component;molecular_function;signal transduction
ENSONIG00000012246	cytosolic 5'-nucleotidase 1A	nt5c1ab	259.915	210.547	1.23427	0.303657	7.85812	7.58292	0.00589239	0.179324	1	protein_coding	ZDB-GENE-131120-153	100708436	I3K2S8	GO:0009117;GO:0008253;GO:0000287;GO:0000166;GO:0005737;GO:0016311	nucleotide metabolic process;5'-nucleotidase activity;magnesium ion binding;nucleotide binding;cytoplasm;dephosphorylation	biological_process;molecular_function;cellular_component	PTHR31367	CYTOSOLIC 5' NUCLEOTIDASE 1B CN1B EC_3.1.3.5 AUTOIMMUNE INFERTILITY RELATED CYTOSOLIC 5' NUCLEOTIDASE IB CN IB	GO:0005575;GO:0005737;GO:0003674;GO:0043167;GO:0016791;GO:0044281;GO:0034641	cellular_component;cytoplasm;molecular_function;ion binding;phosphatase activity;small molecule metabolic process;cellular nitrogen compound metabolic process	00240+3.1.3.5;00230+3.1.3.5;00760+3.1.3.5
ENSONIG00000014015			2.10315	0.395703	5.32823	2.41366	0.828415	7.58067	0.00589975	0.179324	1	protein_coding				GO:0016567;GO:0004842;GO:0008270;GO:0005515;GO:0046872	protein ubiquitination;ubiquitin-protein transferase activity;zinc ion binding;protein binding;metal ion binding	biological_process;molecular_function	PTHR24103_SF249	AMBIGUOUS	GO:0003674;GO:0043167;GO:0006464	molecular_function;ion binding;cellular protein modification process
ENSONIG00000001155	inositol-3-phosphate synthase 1	ISYNA1	184.511	377.144	-2.04404	-1.03143	7.93878	7.55987	0.00596823	0.179706	1	protein_coding		100704062	I3IXX3	GO:0006021;GO:0004512;GO:0008654	inositol biosynthetic process;inositol-3-phosphate synthase activity;phospholipid biosynthetic process	biological_process;molecular_function	PTHR11510	INOSITOL 3 PHOSPHATE SYNTHASE 1 IPS 1 EC_5.5.1.4 MYO INOSITOL 1 PHOSPHATE SYNTHASE MI 1 P SYNTHASE MIP SYNTHASE	GO:0009058;GO:0006629;GO:0016853;GO:0044281;GO:0005975	biosynthetic process;lipid metabolic process;isomerase activity;small molecule metabolic process;carbohydrate metabolic process	00521+5.5.1.4;00562+5.5.1.4
ENSONIG00000002697	importin 13	ipo13	83.335	68.2999	1.22018	0.287092	6.22769	7.56927	0.00593719	0.179706	1	protein_coding	ZDB-GENE-070706-1		I3J3E2	GO:0006886;GO:0008536;GO:0005634;GO:0007632;GO:0007634;GO:0010842	intracellular protein transport;Ran GTPase binding;nucleus;visual behavior;optokinetic behavior;retina layer formation	biological_process;molecular_function;cellular_component	PTHR12363	IMPORTIN	GO:0006810;GO:0005575;GO:0043226;GO:0005634;GO:0048856;GO:0048646	transport;cellular_component;organelle;nucleus;anatomical structure development;anatomical structure formation involved in morphogenesis
ENSONIG00000006861	integrin alpha 4	itga4	1.296	2.7119	-2.09495	-1.06692	1.0695	7.57293	0.00592515	0.179706	2	protein_coding	ZDB-GENE-110411-108			GO:0008305;GO:0007155;GO:0016020;GO:0016021;GO:0007229	integrin complex;cell adhesion;membrane;integral component of membrane;integrin-mediated signaling pathway	cellular_component;biological_process	PTHR23220_SF78	INTEGRIN ALPHA 4 PRECURSOR CD49 ANTIGEN FAMILY MEMBER D INTEGRIN ALPHA IV VLA 4 SUBUNIT ALPHA CD49D ANTIGEN	GO:0007155;GO:0032991;GO:0005575;GO:0007165	cell adhesion;protein-containing complex;cellular_component;signal transduction
ENSONIG00000007105	lysophosphatidylcholine acyltransferase 1	LPCAT1 (1 of many)	52.5645	39.3199	1.33478	0.4166	5.54763	7.55873	0.00597202	0.179706	1	protein_coding		100699650	I3JJB9	GO:0016746;GO:0005509;GO:0016020;GO:0016021	transferase activity, transferring acyl groups;calcium ion binding;membrane;integral component of membrane	molecular_function;cellular_component	PTHR23063	GLYCEROL 3 PHOSPHATE ACYLTRANSFERASE EC_2.3.1.15 1 3 PHOSPHATE O ACYLTRANSFERASE 1 AGP ACYLTRANSFERASE 1 AGPAT LYSOPHOSPHATIDIC ACID ACYLTRANSFERASE LPAAT	GO:0003674;GO:0043167;GO:0016746;GO:0005575	molecular_function;ion binding;transferase activity, transferring acyl groups;cellular_component
ENSONIG00000012256	mitogen-activated protein kinase kinase kinase kinase 4	MAP4K4 (1 of many)	78.2899	61.1359	1.28025	0.356431	6.1385	7.5634	0.00595656	0.179706	2	protein_coding			I3K2U0;I3K2T9	GO:0006468;GO:0004672;GO:0005524	protein phosphorylation;protein kinase activity;ATP binding	biological_process;molecular_function	PTHR24361_SF225	MITOGEN ACTIVATED KINASE KINASE KINASE KINASE 4 EC_2.7.11.1 HPK/GCK KINASE HGK MAPK/ERK KINASE KINASE KINASE 4 MEK KINASE KINASE 4 MEKKK 4 NCK INTERACTING KINASE	GO:0003674;GO:0043167;GO:0016301;GO:0006464	molecular_function;ion binding;kinase activity;cellular protein modification process
ENSONIG00000017727	regulator of G-protein signaling 5	si:ch211-196h16.12	26.6891	36.9864	-1.38278	-0.467572	5.0754	7.55529	0.00598342	0.179706	1	protein_coding	ZDB-GENE-121214-351	100708390	I3KMK6				PTHR10845_SF155	REGULATOR OF G SIGNALING 21 RGS21
ENSONIG00000020087			30.4201	6.35408	4.78049	2.25716	4.48869	7.55616	0.00598054	0.179706	1	protein_coding				GO:0008305;GO:0007155;GO:0016020;GO:0016021;GO:0007229	integrin complex;cell adhesion;membrane;integral component of membrane;integrin-mediated signaling pathway	cellular_component;biological_process	PTHR23220_SF17	INTEGRIN ALPHA X PRECURSOR CD11 ANTIGEN FAMILY MEMBER C LEUKOCYTE ADHESION GLYCOPROTEIN P150 95 ALPHA CHAIN LEUKOCYTE ADHESION RECEPTOR P150 95 CD11C ANTIGEN	GO:0007155;GO:0032991;GO:0005575;GO:0007165	cell adhesion;protein-containing complex;cellular_component;signal transduction
ENSONIG00000019067	protein kinase AMP-activated non-catalytic subunit gamma 1	prkag1	67.2248	55.1085	1.21817	0.284716	5.95673	7.54224	0.00602691	0.180705	1	protein_coding	ZDB-GENE-040426-2188	100691214	I3KSB1	GO:0032559;GO:0071900	adenyl ribonucleotide binding;regulation of protein serine/threonine kinase activity	molecular_function;biological_process	PTHR13780	5' AMP ACTIVATED KINASE SUBUNIT GAMMA AMPK SUBUNIT GAMMA	GO:0003674;GO:0008150	molecular_function;biological_process
ENSONIG00000001722			11.9222	16.3119	-1.36386	-0.447699	3.73319	7.52336	0.0060904	0.181082	1	protein_coding				GO:0034993;GO:0005635;GO:0090286;GO:0051015;GO:0016021;GO:0005515;GO:0016020;GO:0003779	meiotic nuclear membrane microtubule tethering complex;nuclear envelope;cytoskeletal anchoring at nuclear membrane;actin filament binding;integral component of membrane;protein binding;membrane;actin binding	cellular_component;biological_process;molecular_function	PTHR11915_SF264	NESPRIN 2 KASH DOMAIN CONTAINING 2 KASH2 NUCLEAR ENVELOPE SPECTRIN REPEAT 2 NUCLEUS AND ACTIN CONNECTING ELEMENT PROTEIN NUANCE SYNAPTIC NUCLEAR ENVELOPE 2 SYNE 2	GO:0003674;GO:0005575;GO:0008092;GO:0007010;GO:0005635;GO:0032991	molecular_function;cellular_component;cytoskeletal protein binding;cytoskeleton organization;nuclear envelope;protein-containing complex
ENSONIG00000010080	annexin A5b	anxa5b	12.1616	16.8174	-1.38408	-0.468926	3.88608	7.5338	0.00605521	0.181082	1	protein_coding	ZDB-GENE-030131-9076			GO:0050819;GO:0005509;GO:0005544;GO:2000145;GO:0005737	negative regulation of coagulation;calcium ion binding;calcium-dependent phospholipid binding;regulation of cell motility;cytoplasm	biological_process;molecular_function;cellular_component	PTHR10502_SF26	ANNEXIN A5 ANCHORIN CII ANNEXIN V ANNEXIN 5 CALPHOBINDIN I CBP I ENDONEXIN II LIPOCORTIN V PLACENTAL ANTICOAGULANT 4 PLACENTAL ANTICOAGULANT I PAP I THROMBOPLASTIN INHIBITOR VASCULAR ANTICOAGULANT ALPHA VAC ALPHA	GO:0003674;GO:0043167;GO:0008289;GO:0005575;GO:0005737	molecular_function;ion binding;lipid binding;cellular_component;cytoplasm
ENSONIG00000013130	serine/threonine-protein kinase TAO1		135.808	112.185	1.21123	0.276471	6.97622	7.5256	0.00608284	0.181082	2	protein_coding		100712260	I3K5X2;I3K5X3	GO:0006468;GO:0004672;GO:0005524	protein phosphorylation;protein kinase activity;ATP binding	biological_process;molecular_function	PTHR24361_SF189	SERINE/THREONINE KINASE TAO1 EC_2.7.11.1 THOUSAND AND ONE AMINO ACID 1	GO:0003674;GO:0043167;GO:0016301;GO:0006464	molecular_function;ion binding;kinase activity;cellular protein modification process
ENSONIG00000013733	thrombospondin-4-B	thbs4a	2.85073	1.23479	2.28145	1.18995	0.896119	7.52328	0.00609067	0.181082	1	protein_coding	ZDB-GENE-080215-11	100693277	I3K831	GO:0007155;GO:0005576;GO:0005509	cell adhesion;extracellular region;calcium ion binding	biological_process;cellular_component;molecular_function	PTHR10199_SF4	THROMBOSPONDIN 4 PRECURSOR	GO:0003674;GO:0043167;GO:0005575;GO:0005576;GO:0007155	molecular_function;ion binding;cellular_component;extracellular region;cell adhesion
ENSONIG00000019941	sodium-dependent neutral amino acid transporter B(0)AT2	slc6a16b	29.971	40.2279	-1.34007	-0.422308	5.19444	7.52967	0.00606912	0.181082	1	protein_coding	ZDB-GENE-070424-95	100691964	I3KVH0	GO:0005328;GO:0016021;GO:0016020;GO:0055085;GO:0015293;GO:0006836	neurotransmitter:sodium symporter activity;integral component of membrane;membrane;transmembrane transport;symporter activity;neurotransmitter transport	molecular_function;cellular_component;biological_process	PTHR11616_SF113	TRANSPORTER	GO:0005575;GO:0022857;GO:0003674;GO:0006810;GO:0055085	cellular_component;transmembrane transporter activity;molecular_function;transport;transmembrane transport
ENSONIG00000004845	cornifelin homolog B		2.35781	0.702742	3.36787	1.75184	1.0894	7.51909	0.00610487	0.1812	2	protein_coding		100700962	I3JB56;I3JB57				PTHR15907_SF34	UNCHARACTERIZED
ENSONIG00000001404	phosphomevalonate kinase	pmvk	15.677	20.5647	-1.30819	-0.387567	4.19654	7.49714	0.00617971	0.182579	1	protein_coding	ZDB-GENE-070410-91	100708938	I3IYT1	GO:0006695;GO:0004631;GO:0005737;GO:0016740;GO:0000166;GO:0005524;GO:0016301;GO:0016310;GO:0006629;GO:0006694;GO:0008202;GO:0008203;GO:0016126;GO:0019287;GO:0005777;GO:0005829	cholesterol biosynthetic process;phosphomevalonate kinase activity;cytoplasm;transferase activity;nucleotide binding;ATP binding;kinase activity;phosphorylation;lipid metabolic process;steroid biosynthetic process;steroid metabolic process;cholesterol metabolic process;sterol biosynthetic process;isopentenyl diphosphate biosynthetic process, mevalonate pathway;peroxisome;cytosol	biological_process;molecular_function;cellular_component	PTHR13101	PHOSPHOMEVALONATE KINASE PMKASE EC_2.7.4.2	GO:0005575;GO:0005737;GO:0016301;GO:0009058;GO:0044281;GO:0006629;GO:0003674;GO:0043167;GO:0006790;GO:0034641;GO:0051186;GO:0043226;GO:0005777;GO:0005829	cellular_component;cytoplasm;kinase activity;biosynthetic process;small molecule metabolic process;lipid metabolic process;molecular_function;ion binding;sulfur compound metabolic process;cellular nitrogen compound metabolic process;cofactor metabolic process;organelle;peroxisome;cytosol	00900+2.7.4.2
ENSONIG00000018143			45.0938	56.4684	-1.25077	-0.322815	5.6135	7.50068	0.00616756	0.182579	1	protein_coding				GO:0032012;GO:0005086;GO:0005543;GO:0005515	regulation of ARF protein signal transduction;ARF guanyl-nucleotide exchange factor activity;phospholipid binding;protein binding	biological_process;molecular_function	PTHR10663_SF115	PH AND SEC7 DOMAIN CONTAINING 1 EXCHANGE FACTOR ADP RIBOSYLATION FACTOR GUANINE NUCLEOTIDE FACTOR 6 EXCHANGE FACTOR ARF6 EXCHANGE FACTOR ARF6 A PLECKSTRIN HOMOLOGY AND SEC7 DOMAIN CONTAINING 1	GO:0003674;GO:0043167;GO:0008289	molecular_function;ion binding;lipid binding
ENSONIG00000024611			4.58309	7.20806	-1.56283	-0.644157	2.52856	7.49638	0.0061823	0.182579	1	lincRNA
ENSONIG00000026250			0.978399	2.89079	-2.94171	-1.55665	0.99979	7.48992	0.00620453	0.18293	3	lincRNA
ENSONIG00000007270	protein tyrosine phosphatase, receptor type, f, a	ptprfa	30.4891	39.5778	-1.29853	-0.376883	5.10474	7.4805	0.00623706	0.183583	2	protein_coding	ZDB-GENE-020107-2			GO:0016791;GO:0016311;GO:0006470;GO:0004725;GO:0005515;GO:0016020;GO:0016021;GO:0016787;GO:0004721;GO:0035335;GO:0097374	phosphatase activity;dephosphorylation;protein dephosphorylation;protein tyrosine phosphatase activity;protein binding;membrane;integral component of membrane;hydrolase activity;phosphoprotein phosphatase activity;peptidyl-tyrosine dephosphorylation;sensory neuron axon guidance	molecular_function;biological_process;cellular_component	PTHR19134_SF203	RECEPTOR TYPE TYROSINE PHOSPHATASE F PRECURSOR EC_3.1.3.48 LEUKOCYTE COMMON ANTIGEN RELATED LAR	GO:0003674;GO:0016791;GO:0006464;GO:0005575	molecular_function;phosphatase activity;cellular protein modification process;cellular_component
ENSONIG00000005546	PQ loop repeat containing 2 like		69.7346	57.0557	1.22122	0.288326	5.98331	7.47305	0.00626295	0.184039	2	protein_coding		100696699	I3JDN1;I3JDN2	GO:0016020;GO:0016021	membrane;integral component of membrane	cellular_component	PTHR16201_SF38	UNCHARACTERIZED PQLC2L PQ LOOP REPEAT CONTAINING 2	GO:0005575	cellular_component
ENSONIG00000017128	SS18L1, nBAF chromatin remodeling complex subunit	SS18L1	62.5178	45.9717	1.35905	0.442604	5.69499	7.46431	0.0062934	0.184627	1	protein_coding		100708315	I3KKF4	GO:0003713;GO:1903508	transcription coactivator activity;positive regulation of nucleic acid-templated transcription	molecular_function;biological_process	PTHR23107_SF4	CALCIUM RESPONSIVE SS18 1	GO:0003674	molecular_function
ENSONIG00000002953	cytochrome c oxidase subunit 5A, mitochondrial	cox5ab	139.035	176.23	-1.26719	-0.341627	7.38776	7.45848	0.00631384	0.184641	1	protein_coding	ZDB-GENE-030131-5162	100707142	I3J4B0	GO:0004129;GO:0005743;GO:0022900;GO:1902600;GO:0021522;GO:0048568	cytochrome-c oxidase activity;mitochondrial inner membrane;electron transport chain;proton transmembrane transport;spinal cord motor neuron differentiation;embryonic organ development	molecular_function;cellular_component;biological_process	PTHR14200	CYTOCHROME C OXIDASE SUBUNIT 5A MITOCHONDRIAL PRECURSOR CYTOCHROME C OXIDASE POLYPEPTIDE VA	GO:0005575;GO:0016491;GO:0022857;GO:0003674;GO:0006091;GO:0006810;GO:0055085;GO:0030154;GO:0048856	cellular_component;oxidoreductase activity;transmembrane transporter activity;molecular_function;generation of precursor metabolites and energy;transport;transmembrane transport;cell differentiation;anatomical structure development
ENSONIG00000017096	cell growth regulator with EF-hand domain 1	cgref1	57.8375	47.194	1.2256	0.293487	5.77812	7.45728	0.00631804	0.184641	1	protein_coding	ZDB-GENE-131121-137		I3KKB4	GO:0005509	calcium ion binding	molecular_function	TF653310	CELL GROWTH REGULATOR WITH EF HAND DOMAIN 1	GO:0003674;GO:0043167	molecular_function;ion binding
ENSONIG00000018405			1.9524	4.13354	-2.15248	-1.106	1.64053	7.45524	0.00632519	0.184641	1	protein_coding				GO:0016020;GO:0016021	membrane;integral component of membrane	cellular_component	PTHR19433_SF60	IMMUNE TYPE RECEPTOR	GO:0005575	cellular_component
ENSONIG00000005163	GS homeobox 1	gsx1	16.3567	21.8799	-1.33367	-0.415399	4.26395	7.44272	0.00636934	0.184831	1	protein_coding	ZDB-GENE-041008-135	100710933	I3JC99	GO:0043565;GO:0006355;GO:0003677;GO:0005634	sequence-specific DNA binding;regulation of transcription, DNA-templated;DNA binding;nucleus	molecular_function;biological_process;cellular_component	PTHR24337	HOMEOBOX	GO:0003674;GO:0003677;GO:0005575;GO:0043226;GO:0005634	molecular_function;DNA binding;cellular_component;organelle;nucleus
ENSONIG00000009408	mindbomb E3 ubiquitin protein ligase 1	mib1	28.8091	40.4443	-1.40242	-0.487921	5.09853	7.44344	0.0063668	0.184831	1	protein_coding	ZDB-GENE-030404-2			GO:0016567;GO:0004842;GO:0008270;GO:0046872;GO:0005515	protein ubiquitination;ubiquitin-protein transferase activity;zinc ion binding;metal ion binding;protein binding	biological_process;molecular_function	PTHR24202_SF52	E3 UBIQUITIN LIGASE MIB1 EC_2.3.2.27 DAPK INTERACTING 1 DIP 1 MIND BOMB HOMOLOG 1 RING TYPE E3 UBIQUITIN TRANSFERASE MIB1	GO:0003674;GO:0043167;GO:0006464	molecular_function;ion binding;cellular protein modification process
ENSONIG00000013444	glutamyl-tRNA amidotransferase subunit C	gatc	25.7254	32.355	-1.2562	-0.32907	4.91343	7.4386	0.00638394	0.184831	1	protein_coding	ZDB-GENE-060526-381		I3K710	GO:0006450;GO:0000166;GO:0005524;GO:0006412;GO:0005739;GO:0016874;GO:0016884;GO:0050567;GO:0032543;GO:0070681;GO:0030956	regulation of translational fidelity;nucleotide binding;ATP binding;translation;mitochondrion;ligase activity;carbon-nitrogen ligase activity, with glutamine as amido-N-donor;glutaminyl-tRNA synthase (glutamine-hydrolyzing) activity;mitochondrial translation;glutaminyl-tRNAGln biosynthesis via transamidation;glutamyl-tRNA(Gln) amidotransferase complex	biological_process;molecular_function;cellular_component	PTHR15004	GLUTAMYL TRNA GLN AMIDOTRANSFERASE SUBUNIT C MITOCHONDRIAL GLU ADT SUBUNIT C EC_6.3.5.-	GO:0008150;GO:0003674;GO:0043167;GO:0009058;GO:0034641;GO:0006412;GO:0005575;GO:0043226;GO:0005739;GO:0016874;GO:0044281;GO:0006520;GO:0006399;GO:0032991	biological_process;molecular_function;ion binding;biosynthetic process;cellular nitrogen compound metabolic process;translation;cellular_component;organelle;mitochondrion;ligase activity;small molecule metabolic process;cellular amino acid metabolic process;tRNA metabolic process;protein-containing complex
ENSONIG00000018262	acyl-CoA oxidase 1	acox1	152.705	129.561	1.17816	0.236535	7.11886	7.44057	0.00637695	0.184831	1	protein_coding	ZDB-GENE-041010-219	100707091	I3KPF2	GO:0005777;GO:0016627;GO:0006631;GO:0006635;GO:0071949;GO:0050660;GO:0055114;GO:0003997	peroxisome;oxidoreductase activity, acting on the CH-CH group of donors;fatty acid metabolic process;fatty acid beta-oxidation;FAD binding;flavin adenine dinucleotide binding;oxidation-reduction process;acyl-CoA oxidase activity	cellular_component;molecular_function;biological_process	PTHR10909_SF263	PEROXISOMAL ACYL COENZYME A OXIDASE 1 AOX EC_1.3.3.6 PALMITOYL COA OXIDASE	GO:0003674;GO:0043167;GO:0044281;GO:0009056;GO:0006629;GO:0016491;GO:0005575;GO:0043226;GO:0005777	molecular_function;ion binding;small molecule metabolic process;catabolic process;lipid metabolic process;oxidoreductase activity;cellular_component;organelle;peroxisome	00071+1.3.3.6;00592+1.3.3.6
ENSONIG00000025002			4.17925	7.55891	-1.79566	-0.844517	2.55456	7.43955	0.00638058	0.184831	1	lincRNA
ENSONIG00000003647			95.6546	80.9433	1.18167	0.240826	6.45735	7.4261	0.00642844	0.18521	1	pseudogene
ENSONIG00000004396	neuropilin-2	nrp2b	114.493	137.418	-1.19918	-0.262042	6.95002	7.42956	0.0064161	0.18521	2	protein_coding	ZDB-GENE-040611-3	100695821	I3J9J3;I3J9J4	GO:0005021;GO:0001525;GO:0017154;GO:0007411;GO:0016020;GO:0038084;GO:0016021;GO:0046872;GO:0007275;GO:0007399;GO:0030154;GO:0071526;GO:0001570;GO:0001755;GO:0007413;GO:0030947	vascular endothelial growth factor-activated receptor activity;angiogenesis;semaphorin receptor activity;axon guidance;membrane;vascular endothelial growth factor signaling pathway;integral component of membrane;metal ion binding;multicellular organism development;nervous system development;cell differentiation;semaphorin-plexin signaling pathway;vasculogenesis;neural crest cell migration;axonal …	molecular_function;biological_process;cellular_component	PTHR10127_SF30	NEUROPILIN 2 PRECURSOR VASCULAR ENDOTHELIAL CELL GROWTH FACTOR 165 RECEPTOR 2	GO:0005575;GO:0003674;GO:0007165;GO:0048646;GO:0043167;GO:0048856;GO:0030154;GO:0048870;GO:0040011	cellular_component;molecular_function;signal transduction;anatomical structure formation involved in morphogenesis;ion binding;anatomical structure development;cell differentiation;cell motility;locomotion
ENSONIG00000006231	monocarboxylate transporter 4	slc16a3 (1 of many)	200.883	164.223	1.22314	0.290591	7.55063	7.42798	0.00642174	0.18521	1	protein_coding	ZDB-GENE-030131-5487	100711927	I3JG62	GO:0005887;GO:0055085;GO:0016021;GO:0008028;GO:0015129;GO:0015718;GO:0016020;GO:0035873	integral component of plasma membrane;transmembrane transport;integral component of membrane;monocarboxylic acid transmembrane transporter activity;lactate transmembrane transporter activity;monocarboxylic acid transport;membrane;lactate transmembrane transport	cellular_component;biological_process;molecular_function	PTHR11360_SF27	MONOCARBOXYLATE TRANSPORTER 4 MCT 4 SOLUTE CARRIER FAMILY 16 MEMBER 3	GO:0005575;GO:0006810;GO:0055085;GO:0022857;GO:0003674	cellular_component;transport;transmembrane transport;transmembrane transporter activity;molecular_function
ENSONIG00000014520	tetraspanin-5	tspan5b	309.628	260.482	1.1886	0.249269	8.16577	7.4229	0.0064399	0.185239	2	protein_coding	ZDB-GENE-041212-12	100707215	I3KAX7;I3KAX6	GO:0016021;GO:0016020	integral component of membrane;membrane	cellular_component	PTHR19282_SF64	TETRASPANIN 17 TSPAN 17 F BOX ONLY 23 TETRASPAN SB134 TRANSMEMBRANE 4 SUPERFAMILY MEMBER 17	GO:0005575	cellular_component
ENSONIG00000005370	CXADR like membrane protein		16.4203	22.2756	-1.35904	-0.442588	4.31116	7.39017	0.00655813	0.186519	1	protein_coding		100712352	I3JD13	GO:0016020;GO:0016021	membrane;integral component of membrane	cellular_component	PTHR12231_SF72	CXADR MEMBRANE	GO:0005575	cellular_component
ENSONIG00000005730	neogenin 1a	neo1a	34.1118	41.708	-1.22005	-0.286946	5.30166	7.40034	0.00652116	0.186519	2	protein_coding	ZDB-GENE-021031-1			GO:0055072;GO:0007399;GO:0038023;GO:0007411;GO:0005887;GO:0016021;GO:0005515;GO:0030513;GO:0016020;GO:0001756;GO:0001841	iron ion homeostasis;nervous system development;signaling receptor activity;axon guidance;integral component of plasma membrane;integral component of membrane;protein binding;positive regulation of BMP signaling pathway;membrane;somitogenesis;neural tube formation	biological_process;molecular_function;cellular_component	PTHR10489_SF55	NEOGENIN	GO:0003674;GO:0005575;GO:0048856;GO:0042592;GO:0048646	molecular_function;cellular_component;anatomical structure development;homeostatic process;anatomical structure formation involved in morphogenesis
ENSONIG00000007627	progestin and adipoQ receptor family member VII, a	paqr7a	141.394	105.742	1.336	0.417922	6.93767	7.40665	0.00649831	0.186519	1	protein_coding	ZDB-GENE-070705-346			GO:0016021;GO:0016020	integral component of membrane;membrane	cellular_component	PTHR20855_SF34	MEMBRANE PROGESTIN RECEPTOR	GO:0005575	cellular_component
ENSONIG00000008734			3.40737	1.2222	2.77309	1.4715	0.988344	7.38915	0.00656184	0.186519	1	protein_coding				GO:0005515	protein binding	molecular_function	PTHR24106_SF58	AMBIGUOUS	GO:0003674	molecular_function
ENSONIG00000010818	ring finger and WD repeat domain 3	rfwd3	11.0645	14.813	-1.33907	-0.421232	3.7485	7.39281	0.00654851	0.186519	1	protein_coding	ZDB-GENE-120529-1	100702066	I3JXK7	GO:0036297;GO:0016567;GO:0004842;GO:0005634;GO:0005515	interstrand cross-link repair;protein ubiquitination;ubiquitin-protein transferase activity;nucleus;protein binding	biological_process;molecular_function;cellular_component	PTHR16047	E3 UBIQUITIN LIGASE RFWD3 EC_2.3.2.27 RING FINGER AND WD REPEAT DOMAIN CONTAINING 3 RING FINGER 201	GO:0003674;GO:0005575;GO:0043226;GO:0005634;GO:0006464;GO:0006259;GO:0006950;GO:0034641	molecular_function;cellular_component;organelle;nucleus;cellular protein modification process;DNA metabolic process;response to stress;cellular nitrogen compound metabolic process
ENSONIG00000012769	regulator of G protein signaling 7 binding protein b	rgs7bpb	240.605	200.933	1.19751	0.260034	7.77943	7.38987	0.00655923	0.186519	1	protein_coding	ZDB-GENE-030131-9502						PTHR21029	REGULATOR OF G SIGNALING BINDING
ENSONIG00000017636	G protein-coupled receptor 174	gpr174	1.177	2.77746	-2.38947	-1.25669	1.10904	7.38726	0.00656877	0.186519	1	protein_coding	ZDB-GENE-100930-1			GO:0016021;GO:0007186;GO:0004930;GO:0016020	integral component of membrane;G protein-coupled receptor signaling pathway;G protein-coupled receptor activity;membrane	cellular_component;biological_process;molecular_function	PTHR24232	RECEPTOR	GO:0003674;GO:0007165;GO:0005575	molecular_function;signal transduction;cellular_component
ENSONIG00000020260	contactin-3	cntn3b	85.821	107.816	-1.25556	-0.328326	6.57043	7.40355	0.00650954	0.186519	1	protein_coding	ZDB-GENE-130530-645	100696343	I3KWN3	GO:0005112;GO:0007399;GO:0007155;GO:0005515;GO:0022008;GO:0030182	Notch binding;nervous system development;cell adhesion;protein binding;neurogenesis;neuron differentiation	molecular_function;biological_process	PTHR10489_SF568	CONTACTIN 4 PRECURSOR BRAIN DERIVED IMMUNOGLOBULIN SUPERFAMILY 2 BIG 2	GO:0003674;GO:0007155;GO:0048856;GO:0030154	molecular_function;cell adhesion;anatomical structure development;cell differentiation
ENSONIG00000001733	MAM domain-containing glycosylphosphatidylinositol anchor protein 2		29.745	40.3522	-1.35413	-0.437361	5.01714	7.36699	0.00664321	0.187173	2	protein_coding		100711078	I3IZY0;I3IZX9	GO:0016020;GO:0005515	membrane;protein binding	cellular_component;molecular_function	PTHR23282_SF62	MAM DOMAIN CONTAINING GLYCOSYLPHOSPHATIDYLINOSITOL ANCHOR 2 PRECURSOR MAM DOMAIN CONTAINING 1	GO:0003674;GO:0005575	molecular_function;cellular_component
ENSONIG00000013770	heat shock 10 protein 1	hspe1	17.4615	26.2681	-1.50011	-0.585064	4.6227	7.37303	0.00662093	0.187173	1	protein_coding	ZDB-GENE-000906-2			GO:0005737;GO:0006457	cytoplasm;protein folding	cellular_component;biological_process	PTHR10772_SF5	10 KDA HEAT SHOCK PROTEIN MITOCHONDRIAL HSP10.10 KDA CHAPERONIN CHAPERONIN 10 CPN10	GO:0006457;GO:0005575;GO:0005737	protein folding;cellular_component;cytoplasm
ENSONIG00000019703	CUGBP Elav-like family member 3	celf3a	85.4518	70.8639	1.20687	0.271271	6.29307	7.37091	0.00662873	0.187173	1	protein_coding	ZDB-GENE-000501-2	100694969	I3KUK2	GO:0003723;GO:0003676	RNA binding;nucleic acid binding	molecular_function	PTHR24622_SF169	CUGBP ELAV FAMILY MEMBER 3 BRUNO 1 CUG BP AND ETR 3 FACTOR 3 ELAV TYPE RNA BINDING 1 ETR 1 RNA BINDING BRUNOL 1 TRINUCLEOTIDE REPEAT CONTAINING GENE 4	GO:0003674;GO:0003723	molecular_function;RNA binding
ENSONIG00000019729	CDC28 protein kinase regulatory subunit 1B	cks1b	2.56671	1.37312	1.88212	0.912357	1.19989	7.36658	0.00664471	0.187173	2	protein_coding	ZDB-GENE-040801-112	100697628	I3KUN7;I3KUN6	GO:0016538;GO:0051301;GO:0007049;GO:0000079	cyclin-dependent protein serine/threonine kinase regulator activity;cell division;cell cycle;regulation of cyclin-dependent protein serine/threonine kinase activity	molecular_function;biological_process	PTHR23415	60S RIBOSOME SUBUNIT BIOGENESIS NIP7 HOMOLOG	GO:0003674;GO:0008150;GO:0030234;GO:0051301;GO:0007049	molecular_function;biological_process;enzyme regulator activity;cell division;cell cycle
ENSONIG00000023529			1.12152	0.405285	2.80205	1.48648	0.135488	7.37631	0.00660886	0.187173	1	lincRNA
ENSONIG00000004152	staufen double-stranded RNA binding protein 1	stau1	490.679	408.261	1.20156	0.264907	8.80888	7.36153	0.00666341	0.187402	1	protein_coding	ZDB-GENE-030131-6372			GO:0003723;GO:0007281	RNA binding;germ cell development	molecular_function;biological_process	PTHR10910_SF59	DOUBLE STRANDED RNA BINDING STAUFEN HOMOLOG 1	GO:0003674;GO:0003723;GO:0048856	molecular_function;RNA binding;anatomical structure development
ENSONIG00000000109	si:ch211-156l18.8	si:ch211-156l18.8	11.0443	19.3174	-1.74515	-0.803352	3.80986	7.3578	0.00667724	0.187493	1	protein_coding	ZDB-GENE-141215-43			GO:0007601;GO:0016021;GO:0007186;GO:0004930;GO:0016020	visual perception;integral component of membrane;G protein-coupled receptor signaling pathway;G protein-coupled receptor activity;membrane	biological_process;cellular_component;molecular_function	PTHR32546_SF7	PROBABLE G COUPLED RECEPTOR 179 PRECURSOR PROBABLE G COUPLED RECEPTOR 158 1 GPR158	GO:0003674;GO:0007165;GO:0005575;GO:0050877	molecular_function;signal transduction;cellular_component;nervous system process
ENSONIG00000008537	5'-nucleotidase domain containing 3	nt5dc3	97.5839	79.3507	1.22888	0.297347	6.42211	7.35142	0.006701	0.187862	1	protein_coding	ZDB-GENE-080523-3			GO:0046872	metal ion binding	molecular_function	PTHR12103_SF11	5' NUCLEOTIDASE DOMAIN CONTAINING 3 EC_3.1.3.-	GO:0003674;GO:0043167	molecular_function;ion binding
ENSONIG00000018107	Fas (tnfrsf6)-associated via death domain	fadd	8.47604	5.83857	1.4506	0.53665	2.90845	7.3443	0.00672758	0.188308	1	protein_coding	ZDB-GENE-070606-3			GO:0042981;GO:0007165;GO:0005515;GO:0043065	regulation of apoptotic process;signal transduction;protein binding;positive regulation of apoptotic process	biological_process;molecular_function	TF622686	FAS ASSOCIATED DEATH DOMAIN FAS ASSOCIATING DEATH DOMAIN CONTAINING MEDIATOR OF RECEPTOR INDUCED TOXICITY FADD	GO:0003674;GO:0007165	molecular_function;signal transduction
ENSONIG00000006601			1.83546	3.31246	-1.82781	-0.870119	1.64047	7.33704	0.00675478	0.188748	2	protein_coding							PTHR22538	CILIA AND FLAGELLA ASSOCIATED 74
ENSONIG00000013573	dishevelled associated activator of morphogenesis 1b	daam1b	9.73924	13.2267	-1.35189	-0.434975	3.46748	7.33383	0.00676687	0.188748	2	protein_coding	ZDB-GENE-030131-4212		I3K7H2;I3K7H3	GO:0017048;GO:0016043;GO:0030036;GO:0003779;GO:0060026	Rho GTPase binding;cellular component organization;actin cytoskeleton organization;actin binding;convergent extension	molecular_function;biological_process	PTHR23213_SF181	DISHEVELED ASSOCIATED ACTIVATOR OF MORPHOGENESIS 1	GO:0003674;GO:0008092;GO:0007010	molecular_function;cytoskeletal protein binding;cytoskeleton organization
ENSONIG00000024767			1.33404	2.40064	-1.7868	-0.83738	0.808051	7.33159	0.00677531	0.188748	1	lincRNA
ENSONIG00000007745	NADH:ubiquinone oxidoreductase subunit S6	ndufs6	50.3447	71.3118	-1.4152	-0.501008	6.05804	7.32521	0.00679941	0.188827	1	protein_coding	ZDB-GENE-040912-86	100693065	I3JLL6	GO:0006120;GO:0005747;GO:0016020;GO:0055114;GO:0005739;GO:0005743;GO:0070469	mitochondrial electron transport, NADH to ubiquinone;mitochondrial respiratory chain complex I;membrane;oxidation-reduction process;mitochondrion;mitochondrial inner membrane;respirasome	biological_process;cellular_component	PTHR13156_SF0	NADH DEHYDROGENASE [UBIQUINONE] IRON SULFUR 6 MITOCHONDRIAL PRECURSOR COMPLEX I 13KD A CI 13KD A NADH UBIQUINONE OXIDOREDUCTASE 13 KDA A SUBUNIT	GO:0044281;GO:0006091;GO:0034641;GO:0032991;GO:0005575;GO:0043226;GO:0005739	small molecule metabolic process;generation of precursor metabolites and energy;cellular nitrogen compound metabolic process;protein-containing complex;cellular_component;organelle;mitochondrion
ENSONIG00000013325	dynein light chain Tctex-type 1	dynlt1	7.06947	10.4102	-1.47851	-0.564145	3.30112	7.32519	0.0067995	0.188827	1	protein_coding	ZDB-GENE-041210-9	100698497	I3K6L2				PTHR21255_SF19	DYNEIN LIGHT CHAIN TCTEX TYPE 1 T COMPLEX TESTIS SPECIFIC 1
ENSONIG00000003845	alpha-1,3-mannosyl-glycoprotein 4-beta-N-acetylglucosaminyltransferase C	mgat4c	43.8189	34.0585	1.28798	0.365111	5.2813	7.30684	0.00686926	0.189564	2	protein_coding	ZDB-GENE-091204-429	100694611	I3J7K3;I3J7K4				PTHR12062_SF8	ALPHA 1 3 MANNOSYL GLYCOPROTEIN 4 BETA N ACETYLGLUCOSAMINYLTRANSFERASE C EC_2.4.1.145 N GLYCOSYL OLIGOSACCHARIDE GLYCOPROTEIN N ACETYLGLUCOSAMINYLTRANSFERASE IVC GNT IVC N ACETYLGLUCOSAMINYLTRANSFERASE IVC UDP N ACETYLGLUCOSAMINE: ALPHA 1 3 D MANNOSIDE BETA 1 4 N ACETYLGLUCOSAMINYLTRANSFERASE IVC
ENSONIG00000007511	ST8 alpha-N-acetyl-neuraminide alpha-2,8-sialyltransferase 5	st8sia5	396.464	335.722	1.18079	0.23975	8.49365	7.31317	0.00684509	0.189564	1	protein_coding	ZDB-GENE-060322-8	100695317		GO:0006486;GO:0008373;GO:0016020;GO:0016021;GO:0016740;GO:0016757;GO:0005794;GO:0097503	protein glycosylation;sialyltransferase activity;membrane;integral component of membrane;transferase activity;transferase activity, transferring glycosyl groups;Golgi apparatus;sialylation	biological_process;molecular_function;cellular_component	PTHR11987	N ALPHA 2 8 SIALYLTRANSFERASE ALPHA 2 8 SIALYLTRANSFERASE SIALYLTRANSFERASE SIAT8 SIALYLTRANSFERASE ST8SIA	GO:0016757;GO:0006464;GO:0005575;GO:0043226;GO:0005794	transferase activity, transferring glycosyl groups;cellular protein modification process;cellular_component;organelle;Golgi apparatus
ENSONIG00000011812	matrix metallopeptidase 9	mmp9	13.0586	8.78087	1.48274	0.56827	3.44433	7.3061	0.00687211	0.189564	1	protein_coding	ZDB-GENE-040426-2132	100701193	I3K177	GO:0031012;GO:0004222;GO:0008237;GO:0008270;GO:0006508;GO:0001503;GO:0030574;GO:0050900;GO:0008233;GO:0016787;GO:0046872;GO:0002633;GO:0009617;GO:0030199;GO:0031101;GO:0033334;GO:0035701;GO:0042060;GO:0060429;GO:0090594	extracellular matrix;metalloendopeptidase activity;metallopeptidase activity;zinc ion binding;proteolysis;ossification;collagen catabolic process;leukocyte migration;peptidase activity;hydrolase activity;metal ion binding;positive regulation of granuloma formation;response to bacterium;collagen fibril organization;fin regeneration;fin morphogenesis;hematopoietic stem cell migration;wound healing;…	cellular_component;molecular_function;biological_process	PTHR10201_SF30	MATRIX METALLOPROTEINASE 9 PRECURSOR MMP 9 EC_3.4.24.35.92 KDA GELATINASE 92 KDA TYPE IV COLLAGENASE GELATINASE B GELB	GO:0003674;GO:0043167;GO:0008233;GO:0005575;GO:0031012;GO:0009056;GO:0002376;GO:0048870;GO:0040011;GO:0030198;GO:0048856;GO:0040007;GO:0006950	molecular_function;ion binding;peptidase activity;cellular_component;extracellular matrix;catabolic process;immune system process;cell motility;locomotion;extracellular matrix organization;anatomical structure development;growth;response to stress
ENSONIG00000014067	si:ch211-161h7.8	si:ch211-161h7.8 (1 of many)	20.2423	14.3889	1.4073	0.492927	4.28354	7.31138	0.00685195	0.189564	1	protein_coding	ZDB-GENE-091204-302						PTHR13253_SF12	UNCHARACTERIZED
ENSONIG00000017334	ankyrin repeat and BTB domain containing 1	abtb1	34.7494	26.8816	1.29087	0.368347	4.94132	7.30134	0.00689033	0.189564	1	protein_coding	ZDB-GENE-141212-241	100694121	I3KL64	GO:0005515	protein binding	molecular_function	PTHR24413_SF83	ANKYRIN REPEAT AND BTB/POZ DOMAIN CONTAINING 1	GO:0003674	molecular_function
ENSONIG00000020089			0.878174	0.24929	3.43406	1.77991	-0.267079	7.30351	0.00688201	0.189564	1	protein_coding				GO:0008305;GO:0007155;GO:0016020;GO:0016021;GO:0007229	integrin complex;cell adhesion;membrane;integral component of membrane;integrin-mediated signaling pathway	cellular_component;biological_process	PTHR23220_SF17	INTEGRIN ALPHA X PRECURSOR CD11 ANTIGEN FAMILY MEMBER C LEUKOCYTE ADHESION GLYCOPROTEIN P150 95 ALPHA CHAIN LEUKOCYTE ADHESION RECEPTOR P150 95 CD11C ANTIGEN	GO:0007155;GO:0032991;GO:0005575;GO:0007165	cell adhesion;protein-containing complex;cellular_component;signal transduction
ENSONIG00000012151	ADAM metallopeptidase with thrombospondin type 1 motif 5	ADAMTS5	31.8217	22.3841	1.41992	0.505808	4.80965	7.29152	0.00692808	0.190307	2	protein_coding		100694579	I3K2F6;I3K2F7	GO:0062023;GO:0004222;GO:0008237;GO:0008270;GO:0006508	collagen-containing extracellular matrix;metalloendopeptidase activity;metallopeptidase activity;zinc ion binding;proteolysis	cellular_component;molecular_function;biological_process	PTHR13723_SF37	A DISINTEGRIN AND METALLOPROTEINASE WITH THROMBOSPONDIN MOTIFS 5 ADAM TS 5 ADAM TS5 ADAMTS 5 EC_3.4.24.- ADMP 2 AGGRECANASE 2	GO:0003674;GO:0043167;GO:0008233;GO:0005575;GO:0031012	molecular_function;ion binding;peptidase activity;cellular_component;extracellular matrix
ENSONIG00000000737	prolyl 4-hydroxylase subunit alpha 1	p4ha1b	7.8924	12.2518	-1.54559	-0.628156	3.34009	7.283	0.00696102	0.190368	1	protein_coding	ZDB-GENE-030131-4089	100702773	I3IWD9	GO:0031418;GO:0016702;GO:0004656;GO:0005783;GO:0016705;GO:0005506;GO:0055114;GO:0016491;GO:0005515;GO:0046872;GO:0019511	L-ascorbic acid binding;oxidoreductase activity, acting on single donors with incorporation of molecular oxygen, incorporation of two atoms of oxygen;procollagen-proline 4-dioxygenase activity;endoplasmic reticulum;oxidoreductase activity, acting on paired donors, with incorporation or reduction of molecular oxygen;iron ion binding;oxidation-reduction process;oxidoreductase activity;protein bindi…	molecular_function;cellular_component;biological_process	PTHR10869_SF40	PROLYL 4 HYDROXYLASE SUBUNIT ALPHA 1 4 PH ALPHA 1 EC_1.14.11.2 PROCOLLAGEN PROLINE 2 OXOGLUTARATE 4 DIOXYGENASE SUBUNIT ALPHA 1	GO:0003674;GO:0016491;GO:0043167;GO:0005575;GO:0043226;GO:0005783;GO:0006464	molecular_function;oxidoreductase activity;ion binding;cellular_component;organelle;endoplasmic reticulum;cellular protein modification process	00330+1.14.11.2
ENSONIG00000001738	zinc finger protein like 1	zfpl1	93.3214	77.3792	1.20536	0.269462	6.44173	7.28517	0.00695262	0.190368	1	protein_coding	ZDB-GENE-040426-1255	100696637	I3IZY7	GO:0016020;GO:0016021	membrane;integral component of membrane	cellular_component	PTHR12981	ZINC FINGER 1	GO:0005575	cellular_component
ENSONIG00000005713	myosin IXA	MYO9A	13.7297	18.3283	-1.32946	-0.410836	3.97244	7.2826	0.00696259	0.190368	1	protein_coding			I3JEA8	GO:0016459;GO:0003774;GO:0035556;GO:0043547;GO:0005096;GO:0005524;GO:0007165;GO:0005515;GO:0000166;GO:0046872;GO:0003779	myosin complex;motor activity;intracellular signal transduction;positive regulation of GTPase activity;GTPase activator activity;ATP binding;signal transduction;protein binding;nucleotide binding;metal ion binding;actin binding	cellular_component;molecular_function;biological_process	PTHR13140_SF9	UNCONVENTIONAL MYOSIN IXA UNCONVENTIONAL MYOSIN 9A	GO:0003674;GO:0007165;GO:0043167;GO:0030234;GO:0032991;GO:0005575;GO:0043226;GO:0005856;GO:0008092	molecular_function;signal transduction;ion binding;enzyme regulator activity;protein-containing complex;cellular_component;organelle;cytoskeleton;cytoskeletal protein binding
ENSONIG00000006733	phosphomannomutase 2	pmm2	19.9304	26.3133	-1.32325	-0.404081	4.58935	7.27881	0.00697727	0.190475	1	protein_coding	ZDB-GENE-030722-6	100707130	I3JI11	GO:0005737;GO:0004615;GO:0009298;GO:0016853;GO:0006487;GO:0022008;GO:0048701;GO:0090171	cytoplasm;phosphomannomutase activity;GDP-mannose biosynthetic process;isomerase activity;protein N-linked glycosylation;neurogenesis;embryonic cranial skeleton morphogenesis;chondrocyte morphogenesis	cellular_component;molecular_function;biological_process	PTHR10466	PHOSPHOMANNOMUTASE PMM EC_5.4.2.8	GO:0005575;GO:0005737;GO:0009058;GO:0044281;GO:0034641;GO:0016853;GO:0006464;GO:0030154;GO:0048856;GO:0009790;GO:0000902	cellular_component;cytoplasm;biosynthetic process;small molecule metabolic process;cellular nitrogen compound metabolic process;isomerase activity;cellular protein modification process;cell differentiation;anatomical structure development;embryo development;cell morphogenesis	00520+5.4.2.8;00051+5.4.2.8
ENSONIG00000003536	heme-binding protein 1	soul3	148.565	123.973	1.19755	0.260091	7.12697	7.27044	0.00700985	0.190483	1	protein_coding	ZDB-GENE-060825-287	102083261	I3J6G3				PTHR11220_SF7	HEME BINDING
ENSONIG00000014184	POU class 2 homeobox 1	pou2f1b	16.2242	22.0108	-1.34804	-0.430861	4.26033	7.27374	0.00699698	0.190483	2	protein_coding	ZDB-GENE-030131-2422	100691666	I3K9N4;I3K9N3	GO:0043565;GO:0003700;GO:0005634;GO:0006355;GO:0003677	sequence-specific DNA binding;DNA-binding transcription factor activity;nucleus;regulation of transcription, DNA-templated;DNA binding	molecular_function;cellular_component;biological_process	PTHR11636_SF47	POU DOMAIN CLASS 2 TRANSCRIPTION FACTOR 1 OCTAMER BINDING 1 OCT 1 OCTAMER BINDING TRANSCRIPTION FACTOR 1 OTF 1	GO:0003674;GO:0003677;GO:0005575;GO:0043226;GO:0005634;GO:0003700	molecular_function;DNA binding;cellular_component;organelle;nucleus;DNA-binding transcription factor activity
ENSONIG00000017195	FYVE, RhoGEF and PH domain containing 3	FGD3	103.736	87.2684	1.18925	0.250049	6.56763	7.2712	0.0070069	0.190483	1	protein_coding			I3KKP2	GO:0035023;GO:0005089;GO:0046872	regulation of Rho protein signal transduction;Rho guanyl-nucleotide exchange factor activity;metal ion binding	biological_process;molecular_function	PTHR12673_SF14	FYVE RHOGEF AND PH DOMAIN CONTAINING 3	GO:0003674;GO:0043167	molecular_function;ion binding
ENSONIG00000016016	zinc finger, RAN-binding domain containing 1b	zranb1b	29.3304	40.8659	-1.39157	-0.476718	5.10486	7.2666	0.00702486	0.190598	1	protein_coding	ZDB-GENE-061110-94			GO:0046872	metal ion binding	molecular_function	TF645663	UBIQUITIN THIOESTERASE ZRANB1 EC_3.4.19.12 ZINC FINGER RAN BINDING DOMAIN CONTAINING	GO:0003674;GO:0043167	molecular_function;ion binding
ENSONIG00000020904	organic solute carrier partner 1a	oscp1a	0.732475	1.63318	-2.19346	-1.13321	0.303322	7.26026	0.00704972	0.190979	1	protein_coding	ZDB-GENE-080204-2						PTHR21196	U7 SNRNA ASSOCIATED SM LSM10
ENSONIG00000000693	EH domain-containing protein 3	ehd3	125.589	104.754	1.1985	0.261228	6.86973	7.25716	0.00706188	0.191016	1	protein_coding	ZDB-GENE-041014-352	100697227	I3IW84	GO:0032456;GO:0005525;GO:0005509;GO:0005515;GO:0005623;GO:0060271	endocytic recycling;GTP binding;calcium ion binding;protein binding;cell;cilium assembly	biological_process;molecular_function;cellular_component	PTHR11216_SF67	EH DOMAIN CONTAINING 3	GO:0003674;GO:0043167;GO:0006810;GO:0016192;GO:0005575;GO:0005623;GO:0022607	molecular_function;ion binding;transport;vesicle-mediated transport;cellular_component;cell;cellular component assembly
ENSONIG00000009856	forkhead box N2b	foxn2b	9.87244	13.3621	-1.34638	-0.429085	3.55963	7.24753	0.00709986	0.191421	1	protein_coding	ZDB-GENE-050417-1		I3JU38	GO:0043565;GO:0003700;GO:0006355;GO:0003677;GO:0005634	sequence-specific DNA binding;DNA-binding transcription factor activity;regulation of transcription, DNA-templated;DNA binding;nucleus	molecular_function;biological_process;cellular_component	PTHR13962_SF10	FORKHEAD BOX N2	GO:0003674;GO:0003700;GO:0003677;GO:0005575;GO:0043226;GO:0005634	molecular_function;DNA-binding transcription factor activity;DNA binding;cellular_component;organelle;nucleus
ENSONIG00000015733	afadin, adherens junction formation factor a	afdna	35.7781	50.7078	-1.41588	-0.501696	5.4135	7.24242	0.00712011	0.191421	1	protein_coding	ZDB-GENE-050419-52		I3KFA3	GO:0007165;GO:0005515;GO:0005911	signal transduction;protein binding;cell-cell junction	biological_process;molecular_function;cellular_component	PTHR10398	AFADIN AFADIN ADHERENS JUNCTION FORMATION FACTOR	GO:0003674;GO:0007165;GO:0005575	molecular_function;signal transduction;cellular_component
ENSONIG00000016366	electron transfer flavoprotein subunit beta	etfb	58.153	47.8339	1.21444	0.280292	5.76913	7.24954	0.00709191	0.191421	1	protein_coding	ZDB-GENE-040426-1931			GO:0009055;GO:0022900	electron transfer activity;electron transport chain	molecular_function;biological_process	PTHR21294	ELECTRON TRANSFER FLAVOPROTEIN SUBUNIT BETA BETA ETF	GO:0016491;GO:0006091	oxidoreductase activity;generation of precursor metabolites and energy
ENSONIG00000017930			27.9649	13.3605	2.09201	1.06489	4.17954	7.24244	0.00712002	0.191421	1	protein_coding
ENSONIG00000012683	cyclin I	ccni	266.169	318.628	-1.19686	-0.259251	8.24529	7.21522	0.0072288	0.194048	2	protein_coding	ZDB-GENE-040426-2898	100690799	I3K4C0;I3K4C1	GO:0051726	regulation of cell cycle	biological_process	PTHR10177_SF187	CYCLIN I
ENSONIG00000016487			1.91208	0.757077	2.49279	1.31776	0.341506	7.18689	0.0073438	0.196836	1	protein_coding				GO:0005515	protein binding	molecular_function	PTHR24106_SF58	AMBIGUOUS	GO:0003674	molecular_function
ENSONIG00000021068			1.6069	3.37239	-2.07668	-1.05428	1.26832	7.17797	0.00738041	0.197518	1	protein_coding				GO:0015074;GO:0003676;GO:0004523;GO:0090502	DNA integration;nucleic acid binding;RNA-DNA hybrid ribonuclease activity;RNA phosphodiester bond hydrolysis, endonucleolytic	biological_process;molecular_function	PTHR24559_SF165	UNCHARACTERIZED	GO:0003674;GO:0006259;GO:0034641;GO:0004518	molecular_function;DNA metabolic process;cellular nitrogen compound metabolic process;nuclease activity
ENSONIG00000017519	tripartite motif-containing protein 16	ftr82	106.22	129.329	-1.21718	-0.283541	6.96174	7.17444	0.00739497	0.197609	1	protein_coding	ZDB-GENE-030219-207	100708751	I3KLU5	GO:0008270;GO:0005515;GO:0046872;GO:0001944	zinc ion binding;protein binding;metal ion binding;vasculature development	molecular_function;biological_process	PTHR24103_SF294	FINTRIM FAMILY MEMBER 82	GO:0003674;GO:0043167;GO:0048856	molecular_function;ion binding;anatomical structure development
ENSONIG00000013364	insulin-like growth factor-binding protein 5	igfbp5a	71.7114	54.3789	1.31775	0.398077	5.96766	7.1682	0.00742073	0.197998	2	protein_coding	ZDB-GENE-070620-8	100696646	I3K6Q4;I3K6Q3	GO:0005520;GO:0005576	insulin-like growth factor binding;extracellular region	molecular_function;cellular_component	PTHR11551_SF4	INSULIN GROWTH FACTOR BINDING 5 PRECURSOR IBP 5 IGF BINDING 5 IGFBP 5	GO:0005575;GO:0005576;GO:0003674	cellular_component;extracellular region;molecular_function
ENSONIG00000000501	Scm polycomb group protein like 4	scml4	41.6212	32.1551	1.29226	0.369897	5.32082	7.15231	0.00748676	0.198025	2	protein_coding	ZDB-GENE-041210-338			GO:0005515;GO:0016020;GO:0016021;GO:0060216	protein binding;membrane;integral component of membrane;definitive hemopoiesis	molecular_function;cellular_component;biological_process	PTHR12247_SF6	SEX COMB ON MIDLEG 4	GO:0003674;GO:0005575;GO:0048856	molecular_function;cellular_component;anatomical structure development
ENSONIG00000010565	phosphatidylethanolamine binding protein 1	pebp1	166.71	211.757	-1.26972	-0.344515	7.66433	7.15125	0.00749119	0.198025	1	protein_coding	ZDB-GENE-040426-2621	100701308	I3JWN9				PTHR11362_SF10	PHOSPHATIDYLETHANOLAMINE BINDING 1 PEBP 1 HCNPPP [CONTAINS HIPPOCAMPAL CHOLINERGIC NEUROSTIMULATING PEPTIDE HCNP ]
ENSONIG00000011739	calcium/calmodulin-dependent protein kinase type II subunit beta	camk2b1	973.188	788.371	1.23446	0.303877	9.70265	7.15055	0.0074941	0.198025	2	protein_coding	ZDB-GENE-030131-9588	100695100	I3K0Y6;I3K0Y5	GO:0005516;GO:0004683;GO:0004674;GO:0006468;GO:0004672;GO:0005524	calmodulin binding;calmodulin-dependent protein kinase activity;protein serine/threonine kinase activity;protein phosphorylation;protein kinase activity;ATP binding	molecular_function;biological_process	PTHR24347_SF107	CALCIUM/CALMODULIN DEPENDENT KINASE TYPE II SUBUNIT BETA CAM KINASE II SUBUNIT BETA CAMK II SUBUNIT BETA EC_2.7.11.17	GO:0003674;GO:0043167;GO:0016301;GO:0006464	molecular_function;ion binding;kinase activity;cellular protein modification process
ENSONIG00000015339	calcium and integrin-binding family member 2	cib2	2.19315	0.89044	2.46015	1.29874	1.10384	7.14911	0.00750011	0.198025	2	protein_coding	ZDB-GENE-040426-1663	100692410	I3KDV3;I3KDV4	GO:0005509;GO:0007638;GO:0043010;GO:0048884	calcium ion binding;mechanosensory behavior;camera-type eye development;neuromast development	molecular_function;biological_process	PTHR23056_SF22	CALCIUM AND INTEGRIN BINDING FAMILY MEMBER 2 KINASE INTERACTING 2 KIP 2	GO:0003674;GO:0043167;GO:0048856	molecular_function;ion binding;anatomical structure development
ENSONIG00000017447	glutathione hydrolase 7	GGT7	430.61	356.986	1.206	0.270228	8.57665	7.16116	0.0074499	0.198025	1	protein_coding		100698815	I3KLK9	GO:0006751;GO:0036374;GO:0006508	glutathione catabolic process;glutathione hydrolase activity;proteolysis	biological_process;molecular_function	PTHR11686_SF18	GLUTATHIONE HYDROLASE 7 PRECURSOR EC_3.4.19.13 GAMMA GLUTAMYLTRANSFERASE 7 GGT 7 EC_2.3.2.- 2 GAMMA GLUTAMYLTRANSFERASE 3 GAMMA GLUTAMYLTRANSPEPTIDASE 7 [CONTAINS GLUTATHIONE HYDROLASE 7 HEAVY CHAIN; GLUTATHIONE HYDROLASE 7 LIGHT CHAIN]	GO:0009056;GO:0006790;GO:0034641;GO:0051186	catabolic process;sulfur compound metabolic process;cellular nitrogen compound metabolic process;cofactor metabolic process	00430+2.3.2.2;00460+2.3.2.2;00480+2.3.2.2+3.4.19.13
ENSONIG00000018597	SERPINE1 mRNA binding protein 1b	serbp1b	7.99028	13.114	-1.64158	-0.715081	3.42257	7.16223	0.00744546	0.198025	1	protein_coding	ZDB-GENE-031118-196			GO:0003723	RNA binding	molecular_function	PTHR12299	INTRACELLULAR HYALURONAN BINDING 4 IHABP4	GO:0003674;GO:0003723	molecular_function;RNA binding
ENSONIG00000022070		RF00002	9.55215	15.8427	-1.65829	-0.729699	3.77629	7.15028	0.00749523	0.198025	1	rRNA
ENSONIG00000003140	neuropilin (NRP) and tolloid (TLL)-like 2b	neto2b	174.139	147.448	1.18033	0.239186	7.26634	7.14443	0.00751973	0.198247	1	protein_coding	ZDB-GENE-060503-638			GO:0005515;GO:2000312;GO:0016020;GO:0016021	protein binding;regulation of kainate selective glutamate receptor activity;membrane;integral component of membrane	molecular_function;biological_process;cellular_component	PTHR10127_SF314	NEUROPILIN AND TOLLOID 2 PRECURSOR BRAIN SPECIFIC TRANSMEMBRANE CONTAINING 2 CUB AND 1 LDL RECEPTOR CLASS A DOMAINS 2	GO:0003674;GO:0005575	molecular_function;cellular_component
ENSONIG00000022686			15.5069	9.58633	1.61007	0.687124	3.69873	7.12976	0.00758149	0.199578	1	lincRNA
ENSONIG00000018330	ependymin		11.8793	17.9928	-1.50871	-0.593311	4.06903	7.12446	0.00760393	0.199872	2	protein_coding		100693001	I3KPN7;I3KPN8	GO:0007160;GO:0005576;GO:0005509	cell-matrix adhesion;extracellular region;calcium ion binding	biological_process;cellular_component;molecular_function	PTHR10697_SF5	EPENDYMIN	GO:0003674;GO:0043167;GO:0005575;GO:0005576;GO:0007155	molecular_function;ion binding;cellular_component;extracellular region;cell adhesion
ENSONIG00000000174	tropomodulin 3	tmod2	414.814	349.276	1.18744	0.247857	8.57069	7.12056	0.00762049	0.20001	1	protein_coding	ZDB-GENE-040912-185	100709294	I3IUD4	GO:0048821;GO:0030036;GO:0051694;GO:0005523	erythrocyte development;actin cytoskeleton organization;pointed-end actin filament capping;tropomyosin binding	biological_process;molecular_function	PTHR10901_SF15	TROPOMODULIN 3 UBIQUITOUS TROPOMODULIN U TMOD	GO:0003674;GO:0008092;GO:0007010;GO:0048856	molecular_function;cytoskeletal protein binding;cytoskeleton organization;anatomical structure development
ENSONIG00000003020	epithelial cell adhesion molecule	epcam	2.08128	0.672623	3.05508	1.61121	0.392416	7.11541	0.00764242	0.200056	2	protein_coding	ZDB-GENE-040426-2209	100707379	I3J4J3;I3J4J2	GO:0016020;GO:0016021;GO:0001889;GO:0002009;GO:0055113;GO:0098609;GO:0005886;GO:0016323;GO:0048471	membrane;integral component of membrane;liver development;morphogenesis of an epithelium;epiboly involved in gastrulation with mouth forming second;cell-cell adhesion;plasma membrane;basolateral plasma membrane;perinuclear region of cytoplasm	cellular_component;biological_process	PTHR14168	EPITHELIAL CELL ADHESION MOLECULE PRECURSOR EP CAM TUMOR ASSOCIATED CALCIUM SIGNAL TRANSDUCER 1 CD326 ANTIGEN	GO:0005575;GO:0048856;GO:0007155;GO:0005886	cellular_component;anatomical structure development;cell adhesion;plasma membrane
ENSONIG00000005308			31.6608	13.7653	2.30144	1.20254	4.48868	7.11483	0.00764489	0.200056	1	protein_coding				GO:0005044;GO:0016020;GO:0006898	scavenger receptor activity;membrane;receptor-mediated endocytosis	molecular_function;cellular_component;biological_process	PTHR19331_SF253	RECEPTOR PRECURSOR	GO:0005575;GO:0003674;GO:0006810;GO:0016192	cellular_component;molecular_function;transport;vesicle-mediated transport
ENSONIG00000012737			0.567036	1.36301	-2.39566	-1.26042	0.183944	7.11043	0.00766369	0.200252	1	protein_coding				GO:0005044;GO:0016020;GO:0016021;GO:0006898	scavenger receptor activity;membrane;integral component of membrane;receptor-mediated endocytosis	molecular_function;cellular_component;biological_process	PTHR19331_SF250	DELETED IN MALIGNANT BRAIN TUMORS 1 PRECURSOR HENSIN	GO:0005575;GO:0003674;GO:0006810;GO:0016192	cellular_component;molecular_function;transport;vesicle-mediated transport
ENSONIG00000007010	synuclein gamma		8.23262	12.0497	-1.46815	-0.553997	3.41762	7.08746	0.0077625	0.20042	1	protein_coding		100708837	I3JIZ8				PTHR13820	SYNUCLEIN
ENSONIG00000009250	PQ loop repeat containing 2	pqlc2	67.1046	53.2487	1.25974	0.333124	5.98532	7.08118	0.00778978	0.20042	1	protein_coding	ZDB-GENE-050306-4	100706031	I3JRY8	GO:0016020;GO:0016021	membrane;integral component of membrane	cellular_component	PTHR16201_SF36	LYSOSOMAL AMINO ACID TRANSPORTER 1 HOMOLOG PQ LOOP REPEAT CONTAINING 2	GO:0005575	cellular_component
ENSONIG00000009294	elongation factor 1-delta	eef1da	17.5836	24.3972	-1.38675	-0.471705	4.48425	7.07784	0.0078043	0.20042	2	protein_coding	ZDB-GENE-040426-2740	100711252	I3JS43;I3JS42	GO:0006414;GO:0003746;GO:0005853;GO:0006412	translational elongation;translation elongation factor activity;eukaryotic translation elongation factor 1 complex;translation	biological_process;molecular_function;cellular_component	PTHR11595	ELONGATION FACTOR 1 EF 1	GO:0003674;GO:0003723;GO:0009058;GO:0008135;GO:0032991;GO:0005575;GO:0034641;GO:0006412	molecular_function;RNA binding;biosynthetic process;translation factor activity, RNA binding;protein-containing complex;cellular_component;cellular nitrogen compound metabolic process;translation
ENSONIG00000009546	transmembrane protein 104	tmem104	11.6079	15.2282	-1.30624	-0.385416	3.74515	7.0852	0.00777234	0.20042	1	protein_coding	ZDB-GENE-070822-4			GO:0016020;GO:0016021	membrane;integral component of membrane	cellular_component	PTHR16189	TRANSMEMBRANE 104	GO:0005575	cellular_component
ENSONIG00000012935	TAP binding protein like	tapbpl	1.67754	0.583428	2.87418	1.52315	0.757607	7.10619	0.00768182	0.20042	1	protein_coding	ZDB-GENE-121003-1	100706487	I3K576	GO:0016020;GO:0019885;GO:0016021	membrane;antigen processing and presentation of endogenous peptide antigen via MHC class I;integral component of membrane	cellular_component;biological_process	PTHR23411_SF3	TAPASIN RELATED PRECURSOR TAPASIN R TAP BINDING TAP BINDING RELATED TAPBP R TAPASIN	GO:0005575;GO:0002376	cellular_component;immune system process
ENSONIG00000013035	RNA binding motif protein 14b	rbm14b	32.8891	44.0162	-1.3364	-0.418355	5.21826	7.08805	0.00775997	0.20042	1	protein_coding	ZDB-GENE-040426-2455			GO:0008270;GO:0003676;GO:0003723	zinc ion binding;nucleic acid binding;RNA binding	molecular_function	PTHR24011_SF226	RNA BINDING 14 RNA BINDING MOTIF 14	GO:0003674;GO:0043167;GO:0003723	molecular_function;ion binding;RNA binding
ENSONIG00000013397	neuritin 1	nrn1a	39.0176	51.0986	-1.30687	-0.386121	5.55656	7.10171	0.00770105	0.20042	1	protein_coding	ZDB-GENE-040718-212	100700033	I3K6U5	GO:0007399	nervous system development	biological_process	PTHR15902	NEURITIN PRECURSOR	GO:0048856	anatomical structure development
ENSONIG00000014431	MLLT10, histone lysine methyltransferase DOT1L cofactor	mllt10	4.16696	7.80148	-1.86439	-0.898707	2.66924	7.08948	0.00775377	0.20042	1	protein_coding	ZDB-GENE-041114-176			GO:0005623;GO:0046872;GO:0019725;GO:0060070;GO:0060729	cell;metal ion binding;cellular homeostasis;canonical Wnt signaling pathway;intestinal epithelial structure maintenance	cellular_component;molecular_function;biological_process	PTHR13793_SF86	UNKNOWN	GO:0005575;GO:0005623;GO:0003674;GO:0043167;GO:0042592;GO:0007165	cellular_component;cell;molecular_function;ion binding;homeostatic process;signal transduction
ENSONIG00000014571	interferon regulatory factor 7	irf7	23.7028	14.3181	1.6579	0.729353	4.20203	7.08926	0.00775471	0.20042	1	protein_coding	ZDB-GENE-040426-1518			GO:0044212;GO:0003700;GO:0006355;GO:0005515;GO:0009615;GO:0030097;GO:0045580;GO:1902037	transcription regulatory region DNA binding;DNA-binding transcription factor activity;regulation of transcription, DNA-templated;protein binding;response to virus;hemopoiesis;regulation of T cell differentiation;negative regulation of hematopoietic stem cell differentiation	molecular_function;biological_process	PTHR11949_SF2	INTERFERON REGULATORY FACTOR IRF	GO:0003674;GO:0003700;GO:0003677;GO:0048856	molecular_function;DNA-binding transcription factor activity;DNA binding;anatomical structure development
ENSONIG00000015799	vacuolar protein sorting-associated protein 26B-like	VPS26B (1 of many)	86.9165	69.3637	1.25183	0.324043	6.29972	7.09986	0.00770901	0.20042	1	protein_coding		100706835	I3KFJ3				PTHR12233	VACUOLAR SORTING ASSOCIATED 26
ENSONIG00000017656	cullin 1	cul1a	56.1305	72.1871	-1.28513	-0.361917	6.0306	7.07743	0.00780607	0.20042	1	protein_coding	ZDB-GENE-030131-2603	100699353	I3KMB9	GO:0006511;GO:0031625;GO:0031461;GO:0030593	ubiquitin-dependent protein catabolic process;ubiquitin protein ligase binding;cullin-RING ubiquitin ligase complex;neutrophil chemotaxis	biological_process;molecular_function;cellular_component	PTHR11932_SF19	CULLIN 1 CUL 1	GO:0009056;GO:0003674;GO:0019899;GO:0032991;GO:0005575;GO:0002376;GO:0048870;GO:0040011	catabolic process;molecular_function;enzyme binding;protein-containing complex;cellular_component;immune system process;cell motility;locomotion
ENSONIG00000018665	transferrin receptor 1a	tfr1a	39.9293	49.2419	-1.23356	-0.302829	5.53697	7.08952	0.00775362	0.20042	1	protein_coding	ZDB-GENE-041220-1			GO:0016020;GO:0016021;GO:0005623;GO:0006879;GO:0030218;GO:0035162;GO:0042541	membrane;integral component of membrane;cell;cellular iron ion homeostasis;erythrocyte differentiation;embryonic hemopoiesis;hemoglobin biosynthetic process	cellular_component;biological_process	PTHR10404	TRANSFERRIN RECEPTOR	GO:0005575;GO:0005623;GO:0042592;GO:0002376;GO:0030154;GO:0048856;GO:0009058	cellular_component;cell;homeostatic process;immune system process;cell differentiation;anatomical structure development;biosynthetic process
ENSONIG00000001427	ankyrin repeat domain 50	ANKRD50	175.145	143.32	1.22265	0.290009	7.3153	7.07422	0.0078201	0.200489	1	protein_coding		100697410	I3IYV7	GO:0005515	protein binding	molecular_function	PTHR24151	ANKYRIN REPEAT DOMAIN CONTAINING 50	GO:0003674	molecular_function
ENSONIG00000009204	E3 ubiquitin-protein ligase Itchy	itchb	24.9044	32.3857	-1.30026	-0.378806	4.8022	7.06276	0.00787025	0.201054	2	protein_coding	ZDB-GENE-131024-2	100697163	I3JRS8;I3JRS9	GO:0061630;GO:0004842;GO:0006511;GO:0005515;GO:0016740;GO:0016567;GO:0048920	ubiquitin protein ligase activity;ubiquitin-protein transferase activity;ubiquitin-dependent protein catabolic process;protein binding;transferase activity;protein ubiquitination;posterior lateral line neuromast primordium migration	molecular_function;biological_process	PTHR11254_SF66	E3 UBIQUITIN LIGASE ITCHY EC_2.3.2.26 HECT TYPE E3 UBIQUITIN TRANSFERASE ITCHY HOMOLOG	GO:0003674;GO:0009056;GO:0006464;GO:0048856;GO:0048870;GO:0040011	molecular_function;catabolic process;cellular protein modification process;anatomical structure development;cell motility;locomotion
ENSONIG00000011174	unc-119 lipid binding chaperone B	unc119.1	92.6141	77.2368	1.19818	0.260842	6.39391	7.0614	0.00787622	0.201054	1	protein_coding	ZDB-GENE-030219-130	100707809	I3JYX1	GO:0007399;GO:0060271;GO:0070121	nervous system development;cilium assembly;Kupffer's vesicle development	biological_process	PTHR12951	UNC 119	GO:0048856;GO:0022607	anatomical structure development;cellular component assembly
ENSONIG00000011817	calcium/calmodulin-dependent protein kinase 1Da	camk1da	8.03344	11.7087	-1.45309	-0.539125	3.27563	7.06316	0.00786851	0.201054	1	protein_coding	ZDB-GENE-080402-7			GO:0006468;GO:0004672;GO:0005524;GO:0010857;GO:0031018;GO:0051216;GO:1990798	protein phosphorylation;protein kinase activity;ATP binding;calcium-dependent protein kinase activity;endocrine pancreas development;cartilage development;pancreas regeneration	biological_process;molecular_function	PTHR24347_SF116	CALCIUM/CALMODULIN DEPENDENT KINASE TYPE 1D EC_2.7.11.17 CAM KINASE I DELTA CAM KI DELTA CAMKI DELTA CAMKI KINASE CKLIK	GO:0003674;GO:0043167;GO:0016301;GO:0006464;GO:0048856	molecular_function;ion binding;kinase activity;cellular protein modification process;anatomical structure development
ENSONIG00000002908			8.31884	12.6637	-1.51002	-0.594563	3.35472	7.05002	0.00792642	0.201155	1	protein_coding							PTHR23233_SF43	B CELL LYMPHOMA/LEUKEMIA 11A BCL 11A B CELL CLL/LYMPHOMA 11A COUP TF INTERACTING 1 ECOTROPIC VIRAL INTEGRATION SITE 9 EVI 9
ENSONIG00000003258			23.295	29.8812	-1.28201	-0.358407	4.70724	7.05698	0.00789571	0.201155	1	protein_coding				GO:0008305;GO:0007155;GO:0016020;GO:0016021;GO:0007229	integrin complex;cell adhesion;membrane;integral component of membrane;integrin-mediated signaling pathway	cellular_component;biological_process	PTHR23220_SF17	INTEGRIN ALPHA X PRECURSOR CD11 ANTIGEN FAMILY MEMBER C LEUKOCYTE ADHESION GLYCOPROTEIN P150 95 ALPHA CHAIN LEUKOCYTE ADHESION RECEPTOR P150 95 CD11C ANTIGEN	GO:0007155;GO:0032991;GO:0005575;GO:0007165	cell adhesion;protein-containing complex;cellular_component;signal transduction
ENSONIG00000004735	neurogenic locus notch homolog protein 2	notch2	26.3602	36.2492	-1.37364	-0.458001	5.04772	7.05479	0.00790534	0.201155	2	protein_coding	ZDB-GENE-000329-4	100698688		GO:0050793;GO:0030154;GO:0038023;GO:0007275;GO:0007219;GO:0016021;GO:0005509;GO:0006355;GO:0005515;GO:0016020;GO:0046872	regulation of developmental process;cell differentiation;signaling receptor activity;multicellular organism development;Notch signaling pathway;integral component of membrane;calcium ion binding;regulation of transcription, DNA-templated;protein binding;membrane;metal ion binding	biological_process;molecular_function;cellular_component	PTHR24033_SF4	NEUROGENIC LOCUS NOTCH HOMOLOG 2 PRECURSOR NOTCH 2 [CONTAINS NOTCH 2 EXTRACELLULAR TRUNCATION; NOTCH 2 INTRACELLULAR DOMAIN]	GO:0003674;GO:0043167;GO:0005575;GO:0007165;GO:0048856;GO:0030154	molecular_function;ion binding;cellular_component;signal transduction;anatomical structure development;cell differentiation
ENSONIG00000010801	chloride voltage-gated channel 2	CLCN2 (1 of many)	43.5983	53.9312	-1.23767	-0.307629	5.59999	7.04837	0.00793375	0.201155	2	protein_coding		100707223	I3JXI5;I3JXI6	GO:0006821;GO:0055085;GO:0016020;GO:0005247;GO:0016021;GO:1902476	chloride transport;transmembrane transport;membrane;voltage-gated chloride channel activity;integral component of membrane;chloride transmembrane transport	biological_process;cellular_component;molecular_function	PTHR11689_SF64	CHLORIDE CHANNEL 2 CLC 2	GO:0005575;GO:0006810;GO:0055085;GO:0022857;GO:0003674	cellular_component;transport;transmembrane transport;transmembrane transporter activity;molecular_function
ENSONIG00000013301	sestrin 1	sesn1	23.8598	33.355	-1.39825	-0.483619	4.84108	7.04763	0.00793704	0.201155	1	protein_coding	ZDB-GENE-040718-408	100696900	I3K6I4	GO:1901031;GO:0005634;GO:0007368	regulation of response to reactive oxygen species;nucleus;determination of left/right symmetry	biological_process;cellular_component	PTHR12474	SESTRIN	GO:0005575;GO:0043226;GO:0005634	cellular_component;organelle;nucleus
ENSONIG00000021393	melanocortin 1 receptor	mc1r	1.93608	0.833954	2.32959	1.22008	0.760868	7.04167	0.00796349	0.201537	1	protein_coding	ZDB-GENE-030502-1	100705045	I3KZZ8	GO:0016021;GO:0007186;GO:0004930;GO:0004977;GO:0004980;GO:0016020;GO:0007165;GO:0005886	integral component of membrane;G protein-coupled receptor signaling pathway;G protein-coupled receptor activity;melanocortin receptor activity;melanocyte-stimulating hormone receptor activity;membrane;signal transduction;plasma membrane	cellular_component;biological_process;molecular_function	PTHR22750	MELANOCYTE STIMULATING HORMONE RECEPTOR MSH R MELANOCORTIN RECEPTOR 1 MC1 R	GO:0003674;GO:0007165;GO:0005575;GO:0005886	molecular_function;signal transduction;cellular_component;plasma membrane
ENSONIG00000006345	histone deacetylase 5	hdac5	19.9175	27.9513	-1.40552	-0.4911	4.48879	7.03705	0.00798403	0.201768	2	protein_coding	ZDB-GENE-121219-3	100693872	I3JGK7;I3JGK8	GO:0000118;GO:0016575;GO:0006325;GO:0004407;GO:0005737;GO:0005634;GO:0040029;GO:0016787;GO:0046872;GO:0032041;GO:0070932	histone deacetylase complex;histone deacetylation;chromatin organization;histone deacetylase activity;cytoplasm;nucleus;regulation of gene expression, epigenetic;hydrolase activity;metal ion binding;NAD-dependent histone deacetylase activity (H3-K14 specific);histone H3 deacetylation	cellular_component;biological_process;molecular_function	PTHR10625_SF57	HISTONE DEACETYLASE 5 HD5 EC_3.5.1.98	GO:0005575;GO:0043226;GO:0005634;GO:0005737;GO:0016810;GO:0006464;GO:0032991;GO:0003674;GO:0043167	cellular_component;organelle;nucleus;cytoplasm;hydrolase activity, acting on carbon-nitrogen (but not peptide) bonds;cellular protein modification process;protein-containing complex;molecular_function;ion binding
ENSONIG00000017707	GTP binding protein 4	gtpbp4	131.412	167.501	-1.27421	-0.349601	7.30851	7.0325	0.00800435	0.201993	1	protein_coding	ZDB-GENE-030131-5982	100691224	I3KMI2	GO:0005730;GO:0005525;GO:0005634;GO:0042254	nucleolus;GTP binding;nucleus;ribosome biogenesis	cellular_component;molecular_function;biological_process	PTHR11702_SF23	NUCLEOLAR GTP BINDING 1	GO:0003674;GO:0043167;GO:0005575;GO:0043226;GO:0005730;GO:0005634;GO:0042254	molecular_function;ion binding;cellular_component;organelle;nucleolus;nucleus;ribosome biogenesis
ENSONIG00000001761	serine/threonine-protein phosphatase 2A catalytic subunit beta isoform		343.581	417.856	-1.21595	-0.282078	8.60144	7.01693	0.00807424	0.202718	1	protein_coding		100710281	I3J016	GO:0016787;GO:0004721;GO:0006470	hydrolase activity;phosphoprotein phosphatase activity;protein dephosphorylation	molecular_function;biological_process	PTHR11668_SF216	SERINE/THREONINE PHOSPHATASE CATALYTIC SUBUNIT EC_3.1.3.16	GO:0016791;GO:0006464	phosphatase activity;cellular protein modification process	04660+3.1.3.16;04658+3.1.3.16
ENSONIG00000011712			34.0484	45.73	-1.34031	-0.42257	5.26558	7.01013	0.00810499	0.202718	2	protein_coding				GO:0004674;GO:0006468;GO:0004672;GO:0005524	protein serine/threonine kinase activity;protein phosphorylation;protein kinase activity;ATP binding	molecular_function;biological_process	PTHR13902_SF10;PTHR13902_SF46	SERINE/THREONINE KINASE WNK2 EC_2.7.11.1 KINASE LYSINE DEFICIENT 2 KINASE WITH NO LYSINE 2;SERINE/THREONINE KINASE WNK1 EC_2.7.11.1 KINASE LYSINE DEFICIENT 1 KINASE WITH NO LYSINE 1	GO:0003674;GO:0043167;GO:0016301;GO:0006464	molecular_function;ion binding;kinase activity;cellular protein modification process	04151+2.7.11.1;04150+2.7.11.1;05165+2.7.11.1;04926+2.7.11.1;04714+2.7.11.1;05170+2.7.11.1;05163+2.7.11.1
ENSONIG00000013768	heparan sulfate glucosamine 3-O-sulfotransferase 1	hs3st1l2	4.14416	6.51336	-1.56602	-0.647103	2.48637	7.00826	0.00811346	0.202718	1	protein_coding	ZDB-GENE-070202-3	100694141	I3K873	GO:0008146;GO:0016740;GO:0060271	sulfotransferase activity;transferase activity;cilium assembly	molecular_function;biological_process	PTHR10605_SF25	SULFOTRANSFERASE EC_2.8.2.-	GO:0022607	cellular component assembly
ENSONIG00000014796	KxDL motif containing 1	kxd1	17.8405	13.4639	1.32168	0.40237	4.00332	7.01932	0.00806349	0.202718	1	protein_coding	ZDB-GENE-040801-207						PTHR13511	KXDL MOTIF CONTAINING 1
ENSONIG00000015650	collagen alpha-2(VI) chain	col6a2	4.99177	7.99588	-1.60774	-0.685032	2.73976	7.00577	0.00812475	0.202718	1	protein_coding	ZDB-GENE-070501-7	100700514	I3KF00	GO:0007409;GO:0007517;GO:0048747	axonogenesis;muscle organ development;muscle fiber development	biological_process	PTHR24023_SF119	COLLAGEN ALPHA 2 VI CHAIN PRECURSOR	GO:0048856	anatomical structure development
ENSONIG00000017426	DEAH-box helicase 35	zgc:158828	46.8567	35.4937	1.3177	0.398018	5.35726	7.0089	0.00811057	0.202718	1	protein_coding	ZDB-GENE-070410-11	100704043	I3KLI2	GO:0004386;GO:0000166;GO:0005524;GO:0016787	helicase activity;nucleotide binding;ATP binding;hydrolase activity	molecular_function	PTHR18934_SF89	PROBABLE ATP DEPENDENT RNA HELICASE DHX35 EC_3.6.4.13 DEAH BOX 35	GO:0004386;GO:0003674;GO:0043167	helicase activity;molecular_function;ion binding
ENSONIG00000020357	prickle homolog 2b	prickle2b	183.237	146.948	1.24652	0.317909	7.33853	7.02008	0.00806006	0.202718	2	protein_coding	ZDB-GENE-030724-6			GO:0008270;GO:0005623;GO:0046872;GO:0003407;GO:0032402;GO:0060271;GO:0070121	zinc ion binding;cell;metal ion binding;neural retina development;melanosome transport;cilium assembly;Kupffer's vesicle development	molecular_function;cellular_component;biological_process	PTHR24218	PRICKLE	GO:0003674;GO:0043167;GO:0005575;GO:0005623;GO:0048856;GO:0006810;GO:0022607	molecular_function;ion binding;cellular_component;cell;anatomical structure development;transport;cellular component assembly
ENSONIG00000022836			117.73	93.4226	1.25962	0.332984	6.73705	7.0069	0.0081196	0.202718	1	lincRNA
ENSONIG00000015137	cell adhesion molecule 3	cadm3	354.04	295.447	1.19803	0.26066	8.31588	6.99995	0.00815118	0.203055	1	protein_coding	ZDB-GENE-060512-196	100705599	I3KD57	GO:0016020;GO:0016021	membrane;integral component of membrane	cellular_component	PTHR23277_SF57	CELL ADHESION MOLECULE 3 PRECURSOR IMMUNOGLOBULIN SUPERFAMILY MEMBER 4B IGSF4B NECTIN 1 NECL 1 SYNAPTIC CELL ADHESION MOLECULE 3 TSLC1 1	GO:0005575	cellular_component
ENSONIG00000015505	eotaxin-like		1.23474	2.59247	-2.08138	-1.05754	1.22014	6.99775	0.00816123	0.203055	1	protein_coding		109199677	I3KEG8	GO:0008009;GO:0006955;GO:0005576;GO:0060326	chemokine activity;immune response;extracellular region;cell chemotaxis	molecular_function;biological_process;cellular_component			GO:0005575;GO:0005576;GO:0002376;GO:0048870;GO:0040011	cellular_component;extracellular region;immune system process;cell motility;locomotion
ENSONIG00000004373	ubiquitin-conjugating enzyme E2 2		47.7383	59.2395	-1.23889	-0.309044	5.8264	6.98899	0.00820126	0.203479	1	protein_coding		100694779	I3J9G7	GO:0016740;GO:0000166;GO:0005524	transferase activity;nucleotide binding;ATP binding	molecular_function	PTHR24068_SF36	UBIQUITIN CONJUGATING ENZYME E2 D1 EC_2.3.2.23 E3 INDEPENDENT E2 UBIQUITIN CONJUGATING ENZYME D1 EC_2.3.2.- 24 E2 UBIQUITIN CONJUGATING ENZYME D1 UBIQUITIN CARRIER D1 UBIQUITIN LIGASE D1	GO:0003674;GO:0043167	molecular_function;ion binding
ENSONIG00000018698	ribosomal protein S7	rps7	73.7128	98.3357	-1.33341	-0.415123	6.57691	6.98927	0.00819998	0.203479	1	protein_coding	ZDB-GENE-040426-1718			GO:0005622;GO:0005840;GO:0006412;GO:0003735;GO:0030097;GO:0043009;GO:0051726	intracellular;ribosome;translation;structural constituent of ribosome;hemopoiesis;chordate embryonic development;regulation of cell cycle	cellular_component;biological_process;molecular_function	PTHR11278	40S RIBOSOMAL S7	GO:0003674;GO:0005198;GO:0003735;GO:0009058;GO:0034641;GO:0006412;GO:0032991;GO:0005575;GO:0043226;GO:0005840;GO:0005622;GO:0048856;GO:0009790	molecular_function;structural molecule activity;structural constituent of ribosome;biosynthetic process;cellular nitrogen compound metabolic process;translation;protein-containing complex;cellular_component;organelle;ribosome;intracellular;anatomical structure development;embryo development
ENSONIG00000018315	linkage group 15 C1orf198 homolog	si:ch73-111k22.2	356.13	300.543	1.18467	0.244489	8.33972	6.98444	0.00822215	0.203711	2	protein_coding	ZDB-GENE-030131-5221	100702939	I3KPL8;I3KPL7				TF334642	UNCHARACTERIZED
ENSONIG00000005526	ribonuclease T2	rnaset2	79.5722	62.329	1.27682	0.352553	6.11174	6.96877	0.00829446	0.203917	1	protein_coding	ZDB-GENE-030131-2513	100699911	I3JDK5	GO:0033897;GO:0003723;GO:0090502;GO:0016075	ribonuclease T2 activity;RNA binding;RNA phosphodiester bond hydrolysis, endonucleolytic;rRNA catabolic process	molecular_function;biological_process	PTHR11240	RIBONUCLEASE T2 PRECURSOR RNASE T2 EC_3.1.27.1	GO:0003674;GO:0003723;GO:0004518;GO:0034641;GO:0009056;GO:0034655	molecular_function;RNA binding;nuclease activity;cellular nitrogen compound metabolic process;catabolic process;nucleobase-containing compound catabolic process
ENSONIG00000010478	transmembrane protein 17	tmem17	2.57156	4.19522	-1.61728	-0.693566	1.95575	6.96758	0.00829996	0.203917	1	protein_coding	ZDB-GENE-070615-15	100700647	I3JWC7	GO:0016020;GO:0016021	membrane;integral component of membrane	cellular_component	PTHR13531	TRANSMEMBRANE	GO:0005575	cellular_component
ENSONIG00000011813	arrestin domain containing 3	arrdc3a	229.903	181.032	1.27014	0.34499	7.67274	6.97489	0.00826613	0.203917	1	protein_coding	ZDB-GENE-030131-2913	100699685	I3K178				PTHR11188_SF49	ARRESTIN DOMAIN CONTAINING 3
ENSONIG00000012356	carboxy-terminal domain RNA polymerase II polypeptide A small phosphatase 1		14.8063	19.0379	-1.28753	-0.364611	4.06624	6.97014	0.00828808	0.203917	2	protein_coding		100699205	I3K369;I3K370	GO:0006357;GO:0016791;GO:0008420;GO:0016311;GO:0006470	regulation of transcription by RNA polymerase II;phosphatase activity;RNA polymerase II CTD heptapeptide repeat phosphatase activity;dephosphorylation;protein dephosphorylation	biological_process;molecular_function	PTHR12210	MITOCHONDRIAL IMPORT INNER MEMBRANE TRANSLOCASE SUBUNIT TIM50 PRECURSOR	GO:0016791;GO:0006464	phosphatase activity;cellular protein modification process	04660+3.1.3.16;04658+3.1.3.16
ENSONIG00000015749	radixin		38.0377	45.8271	-1.20267	-0.266246	5.43395	6.97824	0.00825065	0.203917	2	protein_coding		100691947	I3KFC6;I3KFC7	GO:0008092;GO:0005856;GO:0003779	cytoskeletal protein binding;cytoskeleton;actin binding	molecular_function;cellular_component	PTHR23281	MOESIN	GO:0003674;GO:0008092;GO:0005575;GO:0043226;GO:0005856	molecular_function;cytoskeletal protein binding;cellular_component;organelle;cytoskeleton
ENSONIG00000017771			2.02922	0.800119	2.53863	1.34405	0.49191	6.96517	0.00831114	0.203917	1	protein_coding				GO:0005515	protein binding	molecular_function	PTHR10271	INTERFERON INDUCED WITH TETRATRICOPEPTIDE REPEATS IFIT INTERFERON INDUCED KDA IFI	GO:0003674	molecular_function
ENSONIG00000020772	potassium voltage-gated channel subfamily A member 1	KCNA5	20.246	27.3863	-1.34668	-0.429412	4.48769	6.97751	0.00825406	0.203917	1	protein_coding		100696994	I3KY80	GO:0008076;GO:0006813;GO:0005249;GO:0051260;GO:0005216;GO:0006811;GO:0055085;GO:0016020;GO:0005515;GO:0016021;GO:0005244;GO:0034765;GO:0005267;GO:0071805	voltage-gated potassium channel complex;potassium ion transport;voltage-gated potassium channel activity;protein homooligomerization;ion channel activity;ion transport;transmembrane transport;membrane;protein binding;integral component of membrane;voltage-gated ion channel activity;regulation of ion transmembrane transport;potassium channel activity;potassium ion transmembrane transport	cellular_component;biological_process;molecular_function	PTHR11537_SF25	POTASSIUM VOLTAGE GATED CHANNEL SUBFAMILY A MEMBER 5 VOLTAGE GATED POTASSIUM CHANNEL SUBUNIT KV1 5	GO:0003674;GO:0005575;GO:0006810;GO:0055085;GO:0022857;GO:0022607;GO:0065003;GO:0032991	molecular_function;cellular_component;transport;transmembrane transport;transmembrane transporter activity;cellular component assembly;protein-containing complex assembly;protein-containing complex
ENSONIG00000000332			4.33966	1.81777	2.3808	1.25144	1.47156	6.95794	0.00834482	0.20446	1	protein_coding							PTHR24106_SF58	AMBIGUOUS
ENSONIG00000000982			0.547572	1.26799	-2.36241	-1.24026	-0.0745922	6.95301	0.00836784	0.20474	3	protein_coding				GO:0016020;GO:0016021	membrane;integral component of membrane	cellular_component	PTHR19433_SF1	IMMUNE TYPE RECEPTOR	GO:0005575	cellular_component
ENSONIG00000007099	solute carrier family 24 member 1	SLC24A1 (1 of many)	72.0328	58.2964	1.23469	0.304145	6.00398	6.93589	0.00844831	0.206423	2	protein_coding			I3JJB3;I3JJB2	GO:0055085;GO:0016021;GO:0016020	transmembrane transport;integral component of membrane;membrane	biological_process;cellular_component	PTHR10846	SODIUM/POTASSIUM/CALCIUM EXCHANGER NA + /K + /CA 2+ EXCHANGE RETINAL NA CA+K EXCHANGER SOLUTE CARRIER FAMILY 24 MEMBER	GO:0005575;GO:0006810;GO:0055085	cellular_component;transport;transmembrane transport
ENSONIG00000012321	plakophilin 1	PKP1 (1 of many)	3.45771	6.0791	-1.74457	-0.802869	2.3785	6.93321	0.00846098	0.206448	1	protein_coding			I3K325	GO:0098609;GO:0007155;GO:0005634;GO:0005515;GO:0030057	cell-cell adhesion;cell adhesion;nucleus;protein binding;desmosome	biological_process;cellular_component;molecular_function	PTHR10372_SF3	PLAKOPHILIN 1 BAND 6 B6P	GO:0003674;GO:0005575;GO:0043226;GO:0005634;GO:0007155	molecular_function;cellular_component;organelle;nucleus;cell adhesion
ENSONIG00000002056	copine-4	cpne4b	283.401	230.601	1.22837	0.29674	8.02245	6.92702	0.00849031	0.206594	1	protein_coding	ZDB-GENE-060503-926	100693691	I3J127				PTHR10857_SF4	COPINE 4 COPINE IV
ENSONIG00000016119	creatine kinase M-type		0.562694	1.47257	-2.52073	-1.33384	0.0914293	6.92796	0.00848584	0.206594	2	protein_coding		100698694	I3KGQ8;I3KGQ9	GO:0016301;GO:0003824;GO:0016772;GO:0006886;GO:0008536;GO:0016740;GO:0000166;GO:0005524;GO:0016310;GO:0005623	kinase activity;catalytic activity;transferase activity, transferring phosphorus-containing groups;intracellular protein transport;Ran GTPase binding;transferase activity;nucleotide binding;ATP binding;phosphorylation;cell	molecular_function;biological_process;cellular_component	PTHR11547	CREATINE KINASE TYPE EC_2.7.3.2 CREATINE KINASE CREATINE	GO:0006810;GO:0003674;GO:0016301;GO:0043167;GO:0005575;GO:0005623	transport;molecular_function;kinase activity;ion binding;cellular_component;cell
ENSONIG00000014196	NADH:ubiquinone oxidoreductase subunit A5	ndufa5	26.6398	39.4146	-1.47646	-0.562147	5.19164	6.92036	0.00852197	0.207079	1	protein_coding	ZDB-GENE-050320-17	100698436	I3K9P9	GO:0005747;GO:0022904	mitochondrial respiratory chain complex I;respiratory electron transport chain	cellular_component;biological_process	PTHR12653_SF0	NADH DEHYDROGENASE [UBIQUINONE] 1 ALPHA SUBCOMPLEX SUBUNIT 5 COMPLEX I SUBUNIT B13 COMPLEX I 13KD B CI 13KD B NADH UBIQUINONE OXIDOREDUCTASE 13 KDA B SUBUNIT	GO:0032991;GO:0005575;GO:0006091	protein-containing complex;cellular_component;generation of precursor metabolites and energy
ENSONIG00000004299	ankyrin repeat and SOCS box containing 14a	asb14a	3.38221	7.00747	-2.07516	-1.05322	2.81391	6.91648	0.00854049	0.207244	1	protein_coding	ZDB-GENE-140106-2			GO:0035556;GO:0005515;GO:0016567	intracellular signal transduction;protein binding;protein ubiquitination	biological_process;molecular_function	PTHR24188_SF3	ANKYRIN REPEAT AND SOCS BOX 14	GO:0003674;GO:0007165;GO:0006464	molecular_function;signal transduction;cellular protein modification process
ENSONIG00000000165	spire-type actin nucleation factor 1b	spire1b	188.751	147.396	1.28072	0.356955	7.37158	6.9021	0.00860946	0.207545	1	protein_coding	ZDB-GENE-120608-4		I3IUC1	GO:0045010;GO:0016192;GO:0003779	actin nucleation;vesicle-mediated transport;actin binding	biological_process;molecular_function	PTHR21345	SPIRE	GO:0003674;GO:0008092;GO:0006810;GO:0016192	molecular_function;cytoskeletal protein binding;transport;vesicle-mediated transport
ENSONIG00000004979	capicua transcriptional repressor a	cica	35.2629	46.7016	-1.32205	-0.402776	5.31646	6.90295	0.00860536	0.207545	2	protein_coding	ZDB-GENE-060503-700			GO:0003677;GO:0005634	DNA binding;nucleus	molecular_function;cellular_component	PTHR13059_SF11	CAPICUA	GO:0003674;GO:0003677;GO:0005575;GO:0043226;GO:0005634	molecular_function;DNA binding;cellular_component;organelle;nucleus
ENSONIG00000011128	N-terminal EF-hand calcium binding protein 2	necab2	40.6086	53.487	-1.31578	-0.395919	5.5358	6.90167	0.00861154	0.207545	1	protein_coding	ZDB-GENE-050706-167			GO:0005509	calcium ion binding	molecular_function	PTHR12178	N TERMINAL EF HAND CALCIUM BINDING EF HAND CALCIUM BINDING NEURONAL CALCIUM BINDING	GO:0003674;GO:0043167	molecular_function;ion binding
ENSONIG00000013036	COP9 signalosome complex subunit 7a	cops7a	68.1358	81.2395	-1.1915	-0.25278	6.22981	6.90235	0.00860824	0.207545	1	protein_coding	ZDB-GENE-030131-8680	100692548	I3K5K0	GO:0008180;GO:0010387	COP9 signalosome;COP9 signalosome assembly	cellular_component;biological_process	PTHR15350_SF7	COP9 SIGNALOSOME COMPLEX SUBUNIT 7A SGN7A SIGNALOSOME SUBUNIT 7A JAB1 CONTAINING SIGNALOSOME SUBUNIT 7A	GO:0032991;GO:0005575;GO:0022607;GO:0065003	protein-containing complex;cellular_component;cellular component assembly;protein-containing complex assembly
ENSONIG00000014898	opiate receptor-like 1	oprl1	18.9373	26.5838	-1.40019	-0.485624	4.5335	6.90839	0.00857923	0.207545	1	protein_coding	ZDB-GENE-040312-4			GO:0004985;GO:0016021;GO:0007186;GO:0004930;GO:0001626;GO:0016020;GO:0007165;GO:0038003;GO:0042923;GO:0005887	opioid receptor activity;integral component of membrane;G protein-coupled receptor signaling pathway;G protein-coupled receptor activity;nociceptin receptor activity;membrane;signal transduction;opioid receptor signaling pathway;neuropeptide binding;integral component of plasma membrane	molecular_function;cellular_component;biological_process	PTHR24229_SF11	NOCICEPTIN RECEPTOR KAPPA TYPE 3 OPIOID RECEPTOR KOR 3 ORPHANIN FQ RECEPTOR	GO:0003674;GO:0007165;GO:0005575	molecular_function;signal transduction;cellular_component
ENSONIG00000017238	mitochondrial ribosomal protein S25	mrps25	21.9166	27.5557	-1.25299	-0.32537	4.69922	6.88817	0.0086768	0.208833	1	protein_coding	ZDB-GENE-050417-52	100712250	I3KKU6	GO:0005739;GO:0003735	mitochondrion;structural constituent of ribosome	cellular_component;molecular_function	PTHR13274	28S RIBOSOMAL S25 MITOCHONDRIAL MRP S25 S25MT	GO:0003674;GO:0005198;GO:0003735;GO:0005575;GO:0043226;GO:0005739	molecular_function;structural molecule activity;structural constituent of ribosome;cellular_component;organelle;mitochondrion
ENSONIG00000010610	ring finger protein, transmembrane 2	rnft2	58.0133	47.1671	1.22788	0.296171	5.68793	6.87566	0.00873774	0.210014	1	protein_coding	ZDB-GENE-050522-168	100702387	I3JWU4	GO:0016020;GO:0016021	membrane;integral component of membrane	cellular_component	PTHR15860_SF2	RING FINGER AND TRANSMEMBRANE DOMAIN CONTAINING 2 TRANSMEMBRANE 118	GO:0005575	cellular_component
ENSONIG00000009229	delta-type opioid receptor	oprk1	42.7062	31.9138	1.33885	0.420991	5.21439	6.86855	0.00877256	0.210565	1	protein_coding	ZDB-GENE-030729-1	100712161	I3JRW4	GO:0004985;GO:0016021;GO:0007186;GO:0004930;GO:0016020;GO:0007165;GO:0038003;GO:0042277	opioid receptor activity;integral component of membrane;G protein-coupled receptor signaling pathway;G protein-coupled receptor activity;membrane;signal transduction;opioid receptor signaling pathway;peptide binding	molecular_function;cellular_component;biological_process	PTHR24229_SF1	KAPPA TYPE OPIOID RECEPTOR K OR 1 KOR 1	GO:0003674;GO:0007165;GO:0005575	molecular_function;signal transduction;cellular_component
ENSONIG00000007810			19.5477	14.8874	1.31058	0.390208	4.11971	6.8642	0.00879398	0.210793	1	protein_coding				GO:0003676	nucleic acid binding	molecular_function	PTHR24409_SF11	ZINC FINGER	GO:0003674	molecular_function
ENSONIG00000000896	YY1 transcription factor b	yy1b	59.7894	72.1113	-1.20545	-0.269568	6.04979	6.84659	0.00888108	0.211701	1	protein_coding	ZDB-GENE-040426-2127			GO:0003676;GO:0046890;GO:0070328	nucleic acid binding;regulation of lipid biosynthetic process;triglyceride homeostasis	molecular_function;biological_process	PTHR14003_SF10	TRANSCRIPTION FACTOR YY2 YIN AND YANG 2 YY 2	GO:0003674;GO:0042592	molecular_function;homeostatic process
ENSONIG00000002110	WD repeat containing, antisense to TP73	wrap73	278.82	229.947	1.2121	0.277507	7.93836	6.84458	0.00889107	0.211701	1	protein_coding	ZDB-GENE-030131-6313	100695386	I3J192	GO:0005515	protein binding	molecular_function	PTHR16220	WD REPEAT CONTAINING WRAP73 WD REPEAT CONTAINING 8 WD REPEAT CONTAINING ANTISENSE TO TP73 GENE	GO:0003674	molecular_function
ENSONIG00000002951	family with sequence similarity 219 member B	fam219b	81.9615	66.3361	1.23433	0.303729	6.21421	6.84312	0.00889831	0.211701	2	protein_coding	ZDB-GENE-050327-82	100706880	I3J4A6;I3J4A7				PTHR31281	UNKNOWN
ENSONIG00000003236	agouti-related protein		0.828895	1.93657	-2.30836	-1.20687	0.447723	6.83726	0.00892757	0.211701	1	protein_coding		100691312	I3J5C4	GO:0005102;GO:0005576;GO:0009755;GO:0010469	signaling receptor binding;extracellular region;hormone-mediated signaling pathway;regulation of signaling receptor activity	molecular_function;cellular_component;biological_process	PTHR16551	AGOUTI SIGNALING PRECURSOR ASP AGOUTI SWITCH	GO:0005575;GO:0005576;GO:0003674;GO:0007165;GO:0008150	cellular_component;extracellular region;molecular_function;signal transduction;biological_process
ENSONIG00000010620	F-box protein 21	fbxo21	48.3609	38.8849	1.24144	0.312018	5.38876	6.85211	0.00885368	0.211701	1	protein_coding	ZDB-GENE-100922-229			GO:0003677;GO:0005515	DNA binding;protein binding	molecular_function	PTHR31350_SF1	F BOX ONLY 21	GO:0003674;GO:0003677	molecular_function;DNA binding
ENSONIG00000012022	uncharacterized LOC102081782		13.392	8.62345	1.55272	0.634799	3.42301	6.83889	0.00891944	0.211701	1	protein_coding		102081782	I3K1Y7
ENSONIG00000014677	rho-associated, coiled-coil containing protein kinase 2b	rock2b	16.4905	12.5239	1.32077	0.401378	3.93993	6.84999	0.00886419	0.211701	1	protein_coding	ZDB-GENE-060125-2		I3KBI2	GO:0007266;GO:0006939;GO:0017048;GO:0032956;GO:0030036;GO:0035556;GO:0004674;GO:0006468;GO:0004672;GO:0005524;GO:0010825;GO:0016740;GO:0000166;GO:0016301;GO:0016310;GO:0046872	Rho protein signal transduction;smooth muscle contraction;Rho GTPase binding;regulation of actin cytoskeleton organization;actin cytoskeleton organization;intracellular signal transduction;protein serine/threonine kinase activity;protein phosphorylation;protein kinase activity;ATP binding;positive regulation of centrosome duplication;transferase activity;nucleotide binding;kinase activity;phospho…	biological_process;molecular_function	PTHR22988	RHO ASSOCIATED KINASE EC_2.7.11.1 RHO ASSOCIATED COILED COIL CONTAINING KINASE RHO ASSOCIATED COILED COIL CONTAINING KINASE ROCK ROCK	GO:0003674;GO:0043167;GO:0016301;GO:0006464;GO:0007165;GO:0007010	molecular_function;ion binding;kinase activity;cellular protein modification process;signal transduction;cytoskeleton organization	04151+2.7.11.1;04150+2.7.11.1;05165+2.7.11.1;04926+2.7.11.1;04714+2.7.11.1;05170+2.7.11.1;05163+2.7.11.1
ENSONIG00000016260	neuronal vesicle trafficking-associated protein 1	caly	274.378	232.149	1.18169	0.240848	7.98028	6.83935	0.00891712	0.211701	1	protein_coding	ZDB-GENE-090313-405	102077312	I3KH75	GO:0048268;GO:0016021;GO:0032051;GO:0007212;GO:0016020	clathrin coat assembly;integral component of membrane;clathrin light chain binding;dopamine receptor signaling pathway;membrane	biological_process;cellular_component;molecular_function	TF332232	NEURONAL VESICLE TRAFFICKING ASSOCIATED NEURON SPECIFIC FAMILY MEMBER	GO:0005575;GO:0022607;GO:0065003;GO:0003674;GO:0007165	cellular_component;cellular component assembly;protein-containing complex assembly;molecular_function;signal transduction
ENSONIG00000023975			4.83189	7.5788	-1.55931	-0.640906	2.51917	6.83368	0.0089455	0.211842	1	lincRNA
ENSONIG00000014004			2.00452	0.677345	2.94224	1.55691	0.338827	6.83019	0.00896299	0.211972	1	protein_coding							PTHR24106_SF58	AMBIGUOUS
ENSONIG00000001247	electron transfer flavoprotein dehydrogenase	etfdh	77.8615	64.2493	1.21021	0.275259	6.13174	6.81097	0.00905997	0.212104	1	protein_coding	ZDB-GENE-040912-168	100691348		GO:0022900;GO:0004174;GO:0055114;GO:0016491;GO:0016020;GO:0016021;GO:0022904	electron transport chain;electron-transferring-flavoprotein dehydrogenase activity;oxidation-reduction process;oxidoreductase activity;membrane;integral component of membrane;respiratory electron transport chain	biological_process;molecular_function;cellular_component	PTHR10617_SF98	ELECTRON TRANSFER FLAVOPROTEIN UBIQUINONE OXIDOREDUCTASE MITOCHONDRIAL PRECURSOR ETF QO ETF UBIQUINONE OXIDOREDUCTASE EC_1.5.5.1 ELECTRON TRANSFERRING FLAVOPROTEIN DEHYDROGENASE ETF DEHYDROGENASE	GO:0016491;GO:0006091;GO:0005575	oxidoreductase activity;generation of precursor metabolites and energy;cellular_component
ENSONIG00000002021	ADP ribosylation factor like GTPase 16	arl16	32.9864	26.2592	1.25251	0.324817	4.99033	6.8074	0.0090781	0.212104	1	protein_coding	ZDB-GENE-070410-114	100702080	I3J0Y9	GO:0005525;GO:0000166	GTP binding;nucleotide binding	molecular_function	PTHR11711_SF42	UNCHARACTERIZED	GO:0003674;GO:0043167	molecular_function;ion binding
ENSONIG00000003305	solute carrier family 45 member 3	slc45a3	2.00116	0.344336	5.71579	2.51495	-0.0757315	6.81981	0.00901521	0.212104	1	protein_coding	ZDB-GENE-070509-3	100693075	I3J5L3	GO:0055085;GO:0016021;GO:0016020	transmembrane transport;integral component of membrane;membrane	biological_process;cellular_component	PTHR19432	SOLUTE CARRIER FAMILY 45 MEMBER	GO:0005575;GO:0006810;GO:0055085	cellular_component;transport;transmembrane transport
ENSONIG00000009333	mediator complex subunit 15	med15	25.914	33.9332	-1.30541	-0.384506	4.92513	6.80065	0.00911245	0.212104	1	protein_coding	ZDB-GENE-040426-2032		I3JS85	GO:0016592;GO:0003712;GO:0006357;GO:0005634	mediator complex;transcription coregulator activity;regulation of transcription by RNA polymerase II;nucleus	cellular_component;molecular_function;biological_process	PTHR31804_SF1	MEDIATOR OF RNA POLYMERASE II TRANSCRIPTION SUBUNIT 15 MEDIATOR COMPLEX SUBUNIT 15	GO:0003674;GO:0032991;GO:0005575;GO:0043226;GO:0005634	molecular_function;protein-containing complex;cellular_component;organelle;nucleus
ENSONIG00000014296	ribosomal protein L7	rpl7	463.622	592.601	-1.27813	-0.35404	9.14517	6.80541	0.00908822	0.212104	1	protein_coding	ZDB-GENE-030131-8654	100702526	I3KA28	GO:0051726	regulation of cell cycle	biological_process	PTHR11524	60S RIBOSOMAL L7
ENSONIG00000015002	heterogeneous nuclear ribonucleoprotein K	hnrnpk	198.992	168.15	1.18281	0.242224	7.52156	6.81669	0.00903097	0.212104	1	protein_coding	ZDB-GENE-040426-1926	100693526	I3KCP3	GO:0006396;GO:0006357;GO:0003723;GO:0003676;GO:0003677	RNA processing;regulation of transcription by RNA polymerase II;RNA binding;nucleic acid binding;DNA binding	biological_process;molecular_function	PTHR10288_SF102	HETEROGENEOUS NUCLEAR RNP K 2 KH DOMAIN CONTAINING 1	GO:0003674;GO:0003677;GO:0003723;GO:0034641	molecular_function;DNA binding;RNA binding;cellular nitrogen compound metabolic process
ENSONIG00000015741	calcium channel, voltage-dependent, T type, alpha 1H subunit a	cacna1ha	52.2319	67.907	-1.29836	-0.376694	5.88968	6.81311	0.00904911	0.212104	1	protein_coding	ZDB-GENE-130103-1			GO:0005891;GO:0070588;GO:0005245;GO:0005216;GO:0006811;GO:0055085;GO:0016020;GO:0016021	voltage-gated calcium channel complex;calcium ion transmembrane transport;voltage-gated calcium channel activity;ion channel activity;ion transport;transmembrane transport;membrane;integral component of membrane	cellular_component;biological_process;molecular_function	PTHR10037_SF181	VOLTAGE DEPENDENT T TYPE SUBUNIT	GO:0005575;GO:0006810;GO:0055085;GO:0022857;GO:0003674;GO:0032991	cellular_component;transport;transmembrane transport;transmembrane transporter activity;molecular_function;protein-containing complex
ENSONIG00000017143	decapping exoribonuclease	DXO	111.363	93.879	1.18576	0.245812	6.70897	6.8183	0.00902282	0.212104	2	protein_coding		100689965	I3KKH1;I3KKH2				PTHR12395	DECAPPING NUCLEASE RAI1 EC_3.6.1.-
ENSONIG00000018614	uridine-cytidine kinase 2b	uck2b	17.9393	14.0752	1.27351	0.348811	4.00717	6.80292	0.00910088	0.212104	1	protein_coding	ZDB-GENE-030131-5265			GO:0016301;GO:0005524;GO:0019206;GO:0006238;GO:0044206;GO:0016740;GO:0000166;GO:0016310;GO:0004849;GO:0044211	kinase activity;ATP binding;nucleoside kinase activity;CMP salvage;UMP salvage;transferase activity;nucleotide binding;phosphorylation;uridine kinase activity;CTP salvage	molecular_function;biological_process	PTHR10285	URIDINE CYTIDINE KINASE EC_2.7.1.48 CYTIDINE MONOPHOSPHOKINASE URIDINE MONOPHOSPHOKINASE	GO:0003674;GO:0043167;GO:0016301;GO:0009058;GO:0044281;GO:0034641	molecular_function;ion binding;kinase activity;biosynthetic process;small molecule metabolic process;cellular nitrogen compound metabolic process	00240+2.7.1.48;00983+2.7.1.48
ENSONIG00000019160	low density lipoprotein receptor-related protein 1Aa	lrp1aa	127.637	169.268	-1.32541	-0.406434	7.14045	6.80804	0.00907482	0.212104	1	protein_coding	ZDB-GENE-030131-7889			GO:0005509;GO:0005515;GO:0016020;GO:0016021;GO:1901342	calcium ion binding;protein binding;membrane;integral component of membrane;regulation of vasculature development	molecular_function;cellular_component;biological_process	PTHR10529_SF100	PROLOW DENSITY LIPOPROTEIN RECEPTOR RELATED 1 PRECURSOR LRP 1 ALPHA 2 MACROGLOBULIN RECEPTOR A2MR CD91 ANTIGEN [CONTAINS LOW DENSITY LIPOPROTEIN RECEPTOR RELATED 1.85 KDA SUBUNIT LRP 85 ; LOW DENSITY LIPOPROTEIN RECEPTOR RELATED 1.515 KDA SUBUNIT LRP 515 ; LOW DENSITY LIPOPROTEIN RECEPTOR RELATED 1 INTRACELLULAR DOMAIN LRPICD ]	GO:0003674;GO:0043167;GO:0005575	molecular_function;ion binding;cellular_component
ENSONIG00000019286	tetratricopeptide repeat protein 39C	TTC39C (1 of many)	619.259	505.153	1.22562	0.29351	9.11405	6.82423	0.00899292	0.212104	1	protein_coding		100690369	I3KT25	GO:0005515	protein binding	molecular_function	PTHR31859	TETRATRICOPEPTIDE REPEAT TPR REPEAT	GO:0003674	molecular_function
ENSONIG00000021001	hydroxycarboxylic acid receptor 2		26.6784	21.902	1.22009	0.286986	4.66978	6.80423	0.00909422	0.212104	1	protein_coding		100690406	I3KYV7	GO:0016021;GO:0007186;GO:0004930;GO:0016020;GO:0007165	integral component of membrane;G protein-coupled receptor signaling pathway;G protein-coupled receptor activity;membrane;signal transduction	cellular_component;biological_process;molecular_function	PTHR24231	RECEPTOR G COUPLED RECEPTOR	GO:0003674;GO:0007165;GO:0005575	molecular_function;signal transduction;cellular_component
ENSONIG00000006117	tubby bipartite transcription factor	tub	158.43	131.212	1.20688	0.271286	7.14	6.79481	0.00914232	0.212241	1	protein_coding	ZDB-GENE-121009-1						PTHR16517_SF20	TUBBY
ENSONIG00000012556	protein tyrosine phosphatase, receptor type, s, a	ptprsa	122.795	168.767	-1.37361	-0.457976	7.12384	6.79633	0.00913456	0.212241	2	protein_coding	ZDB-GENE-020107-3			GO:0016791;GO:0016311;GO:0006470;GO:0004725;GO:0005515;GO:0016020;GO:0016021;GO:0016787;GO:0004721;GO:0035335;GO:0021772	phosphatase activity;dephosphorylation;protein dephosphorylation;protein tyrosine phosphatase activity;protein binding;membrane;integral component of membrane;hydrolase activity;phosphoprotein phosphatase activity;peptidyl-tyrosine dephosphorylation;olfactory bulb development	molecular_function;biological_process;cellular_component	PTHR19134_SF204	RECEPTOR TYPE TYROSINE PHOSPHATASE S PRECURSOR R PTP S EC_3.1.3.48 RECEPTOR TYPE TYROSINE PHOSPHATASE SIGMA R PTP SIGMA	GO:0003674;GO:0016791;GO:0006464;GO:0005575;GO:0048856	molecular_function;phosphatase activity;cellular protein modification process;cellular_component;anatomical structure development
[truncated: 16,928 more rows]

## Sheet: DEG
gene_id	gene_description	gene_name	baseMeanCPM_KT_30	baseMeanCPM_V_30	FC	logFC	logCPM	LR	PValue	FDR	transcript_count	gene_biotype	zfin_id_id	Entrez_id	Uniprot_id	go_id	go_term	go_ontology	interpro_family	interpro_family_description	goslim_goa_accession	goslim_goa_description	kegg_path_enzyme
[truncated: 319 more rows]
